# Supplementary material for: The UK Coronavirus Job Retention Scheme and diet, physical activity, and sleep during the COVID-19 pandemic: evidence from eight longitudinal population surveys
Source: Springer Nature journal article supplement (doi:10.1186/s12916-022-02343-y), 2022-04-06

## Additional File 4: Stratified Results

### Results stratified by Age

|                                                                         |    |
|-------------------------------------------------------------------------|----|
| Figure set 1: Currently eats 2 or fewer fruit & veg .....               | 3  |
| Figure set 2: Fewer fruit & veg .....                                   | 5  |
| Figure set 3: More fruit & veg .....                                    | 7  |
| Figure set 4: Less than 3 days a week of at least 30min exercise .....  | 9  |
| Figure set 5: Less time/ fewer days of physical exercise .....          | 11 |
| Figure set 6: More time/ days of physical exercise .....                | 13 |
| Figure set 7: Sleeps outside 'Normal Range' (i.e. <6 or 9+ hours) ..... | 15 |
| Figure set 8: Sleeps less than before .....                             | 17 |
| Figure set 9: Sleeps less than before .....                             | 19 |
| Figure set 10: From 6/9h a night to outside 'normal range' .....        | 22 |
| Figure set 11: From outside 'normal range' to 6/9h a night .....        | 24 |

### Results stratified by Education

|                                                                          |    |
|--------------------------------------------------------------------------|----|
| Figure set 12: Currently eats 2 or fewer fruit and veg .....             | 26 |
| Figure set 13: Fewer fruit and veg .....                                 | 28 |
| Figure set 14: More fruit and veg .....                                  | 30 |
| Figure set 15: Less than 3 days a week of at least 30min exercise .....  | 32 |
| Figure set 16: Less time/ fewer days of physical exercise .....          | 34 |
| Figure set 17: More time/ days of physical exercise .....                | 37 |
| Figure set 18: Sleeps outside 'normal range' (i.e. <6 or 9+ hours) ..... | 40 |
| Figure set 19: Sleeps less than before .....                             | 42 |
| Figure set 20: Sleeps more than before .....                             | 45 |
| Figure set 21: From 6/9h a night to 'normal range' .....                 | 48 |
| Figure set 22: From 'normal range' to 6/9h a night .....                 | 50 |

## Results stratified by Sex

|                                                                          |    |
|--------------------------------------------------------------------------|----|
| Figure set 23: Currently eats 2 or fewer fruit and veg .....             | 52 |
| Figure set 24: Fewer fruit and veg .....                                 | 54 |
| Figure set 25: More fruit and veg .....                                  | 56 |
| Figure set 26: Less than 3 days a week of at least 30min exercise .....  | 58 |
| Figure set 27: Less time/fewer days of physical exercise .....           | 60 |
| Figure set 28: More time/ days of physical exercise.....                 | 63 |
| Figure set 29: Sleeps outside ‘normal range’ (i.e. <6 or 9+ hours) ..... | 66 |
| Figure set 30: Sleeps less than before .....                             | 68 |
| Figure set 31: Sleeps more than before.....                              | 71 |
| Figure set 32: From 6/9h a night to outside ‘normal range’ .....         | 74 |
| Figure set 33: From outside ‘normal range’ to 6/9h a night .....         | 76 |

Notes: Moderation by age, education, and sex was assessed with stratified regressions using “full” adjustment that includes socio-demographic characteristics as well as pre-pandemic measures of psychological distress, self-rated health, and health behaviours

Figure set 1: Currently eats 2 or fewer fruit & veg

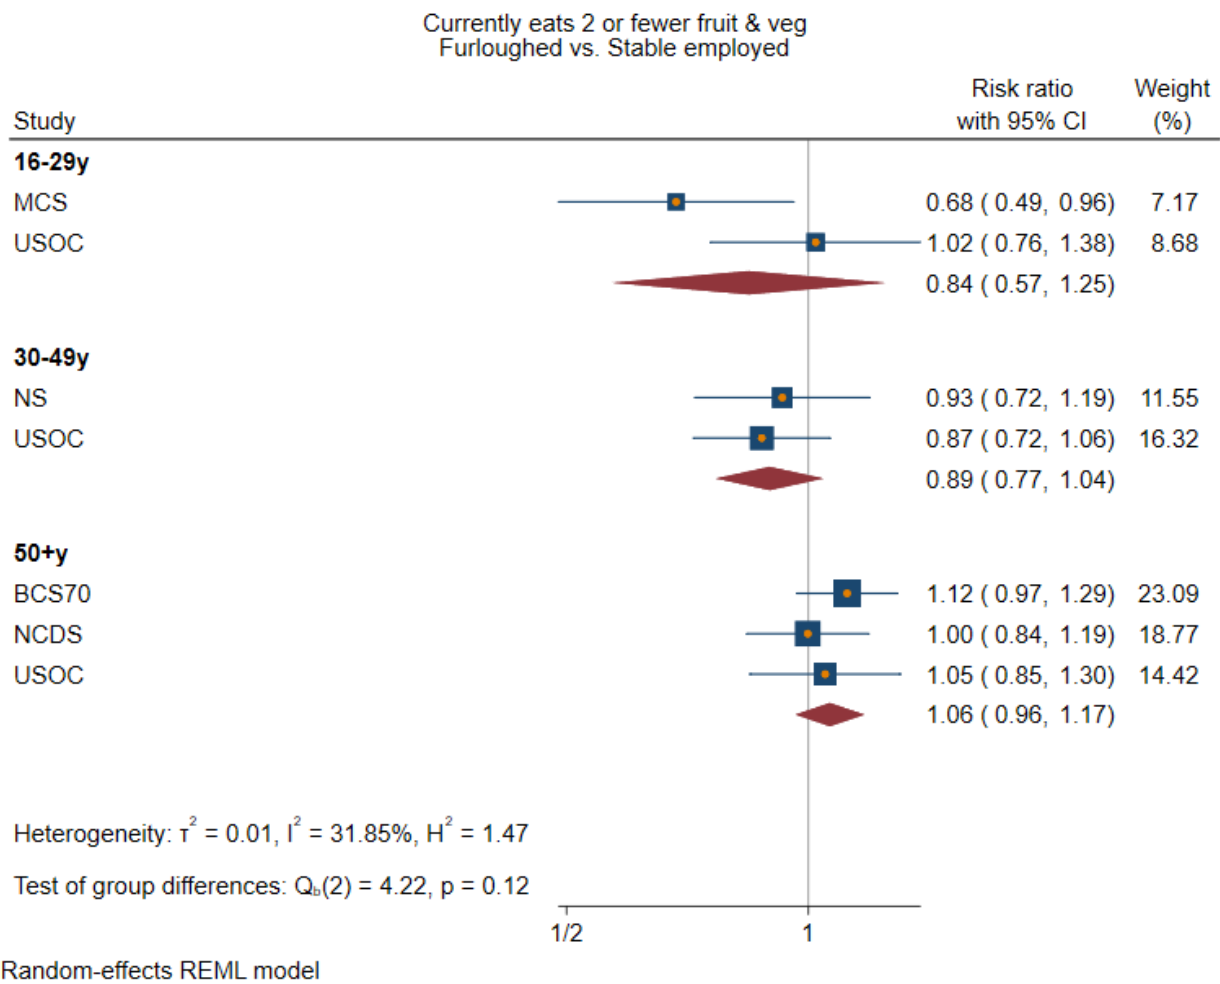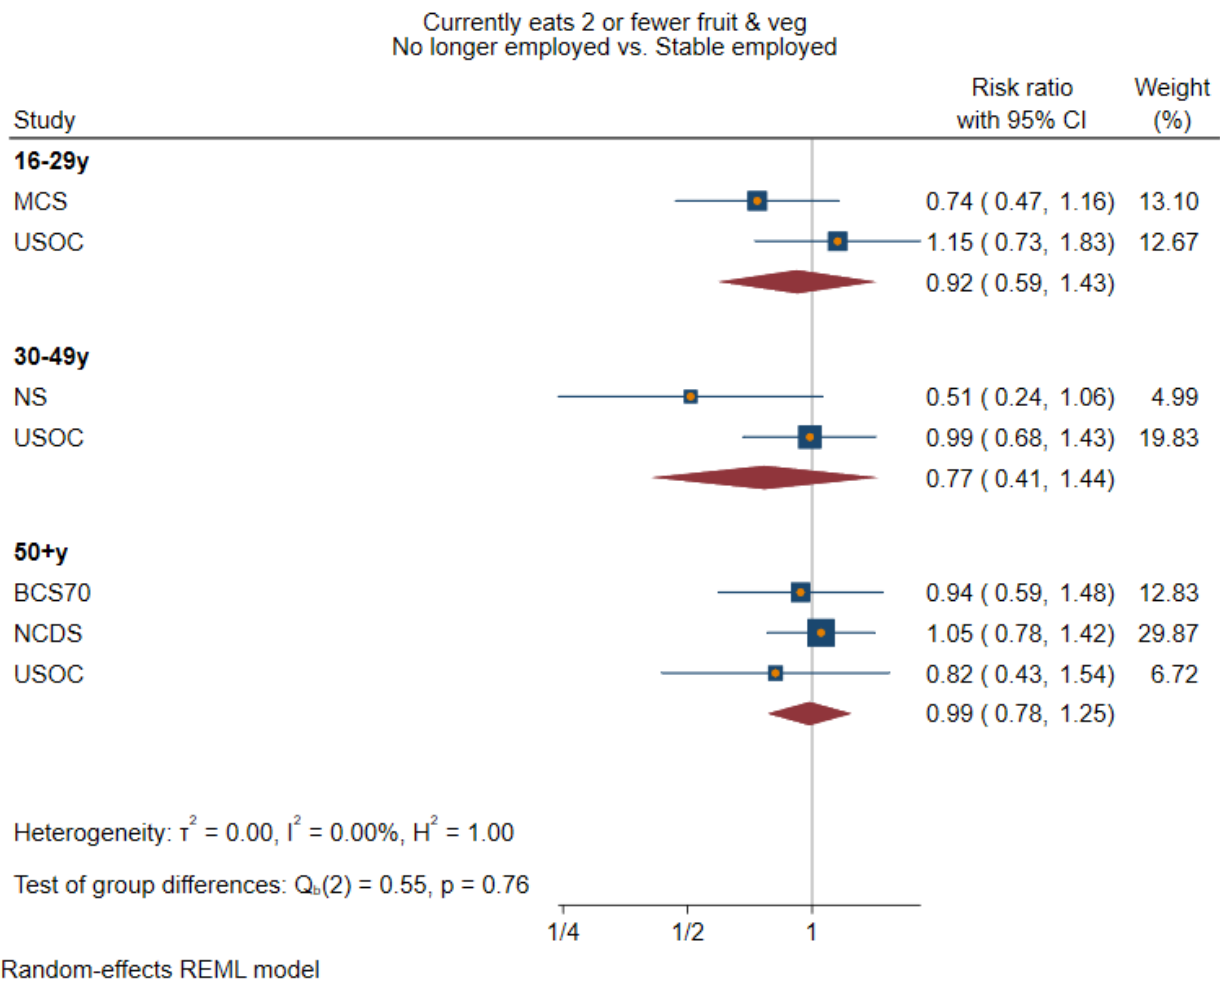

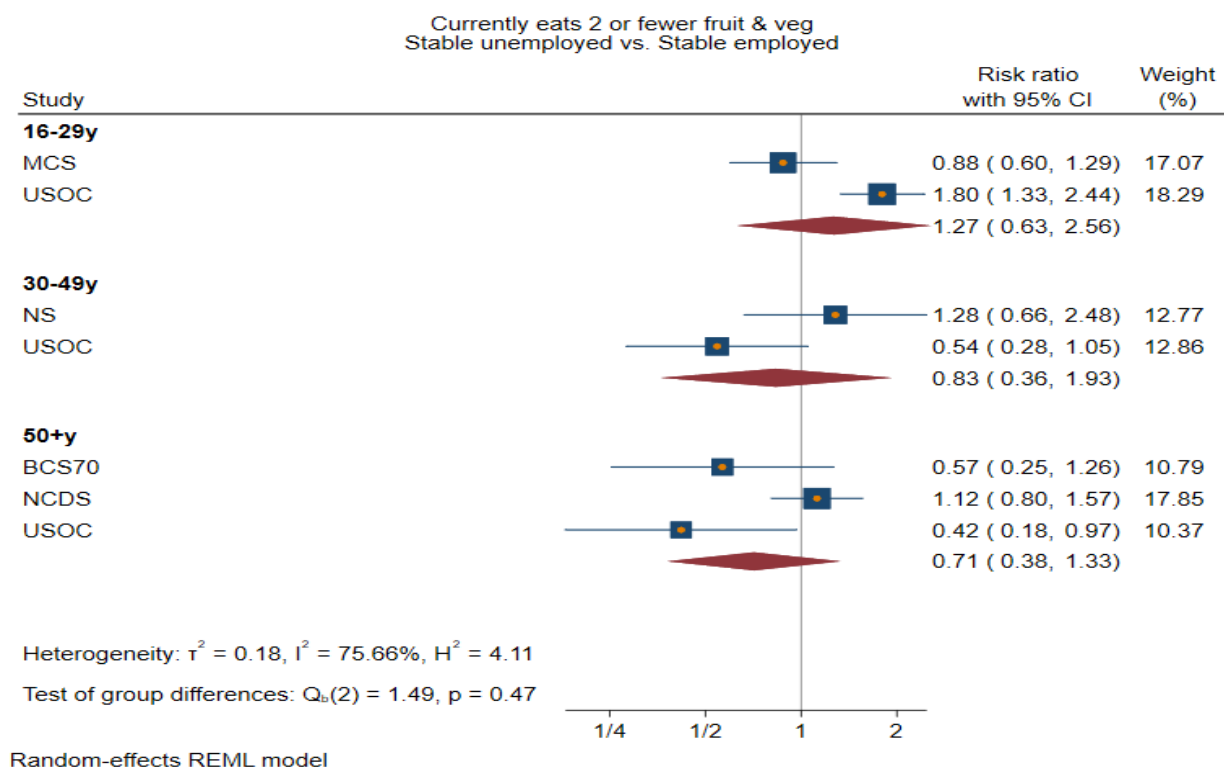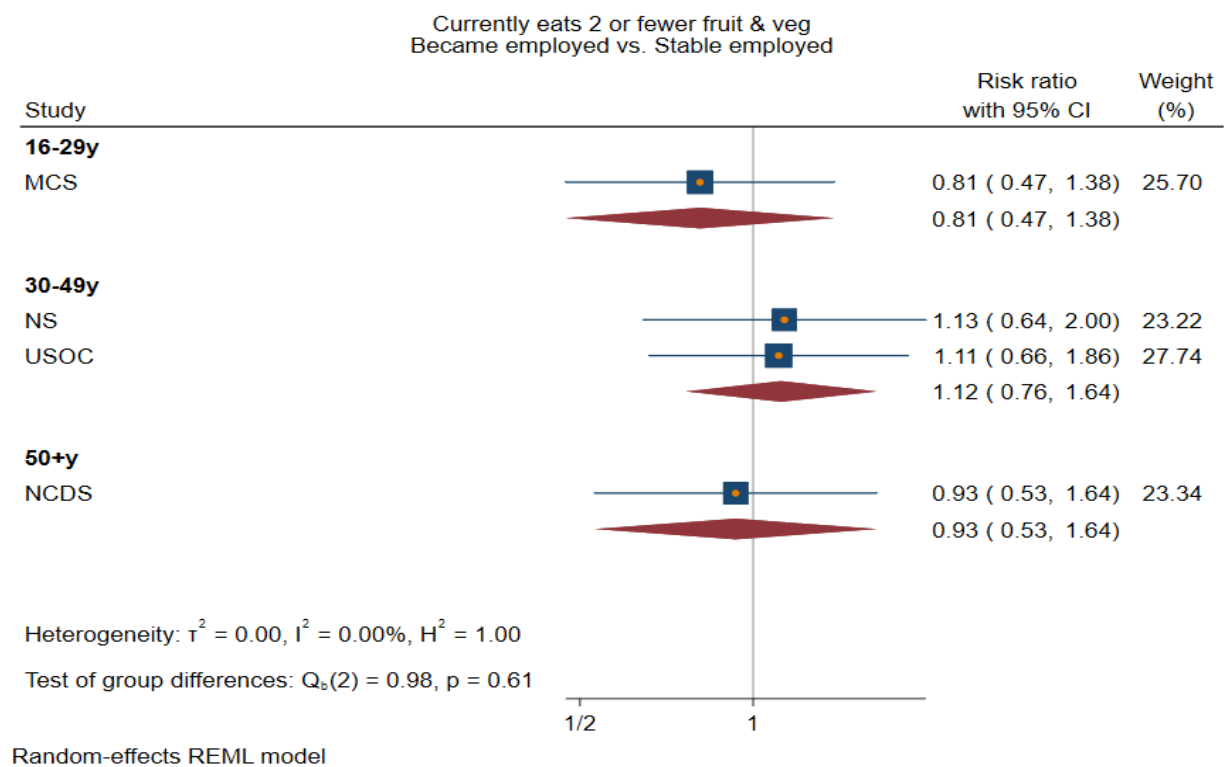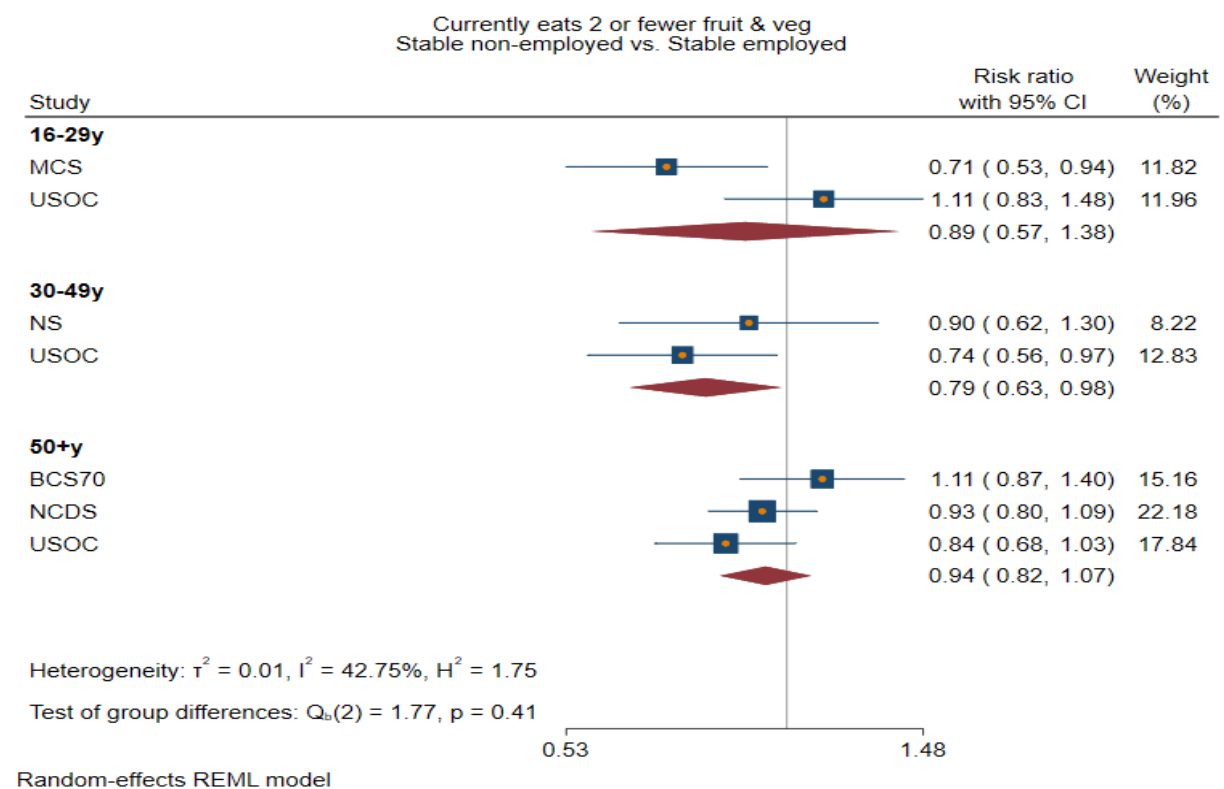

Figure set 2: Fewer fruit & veg

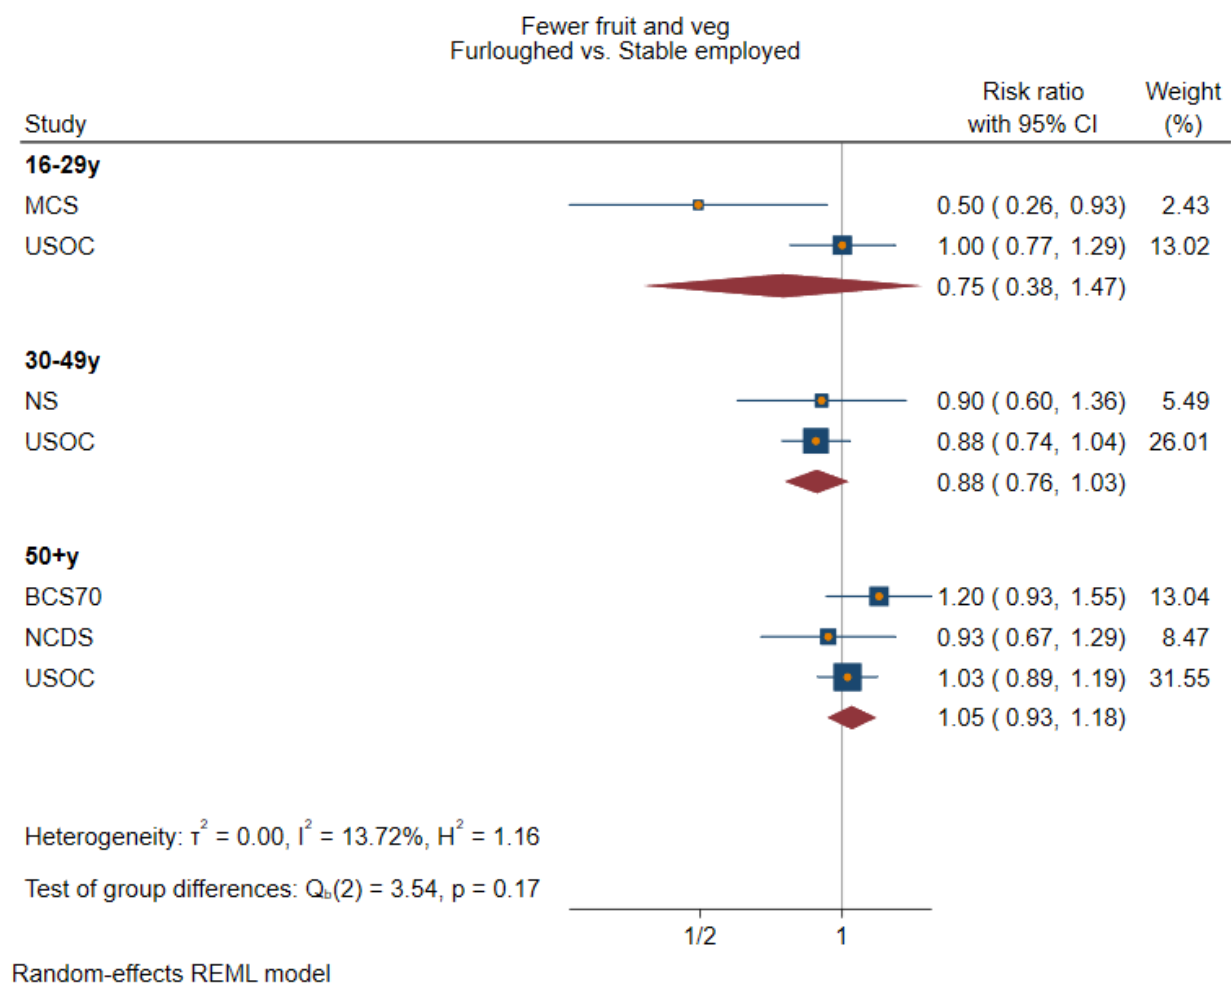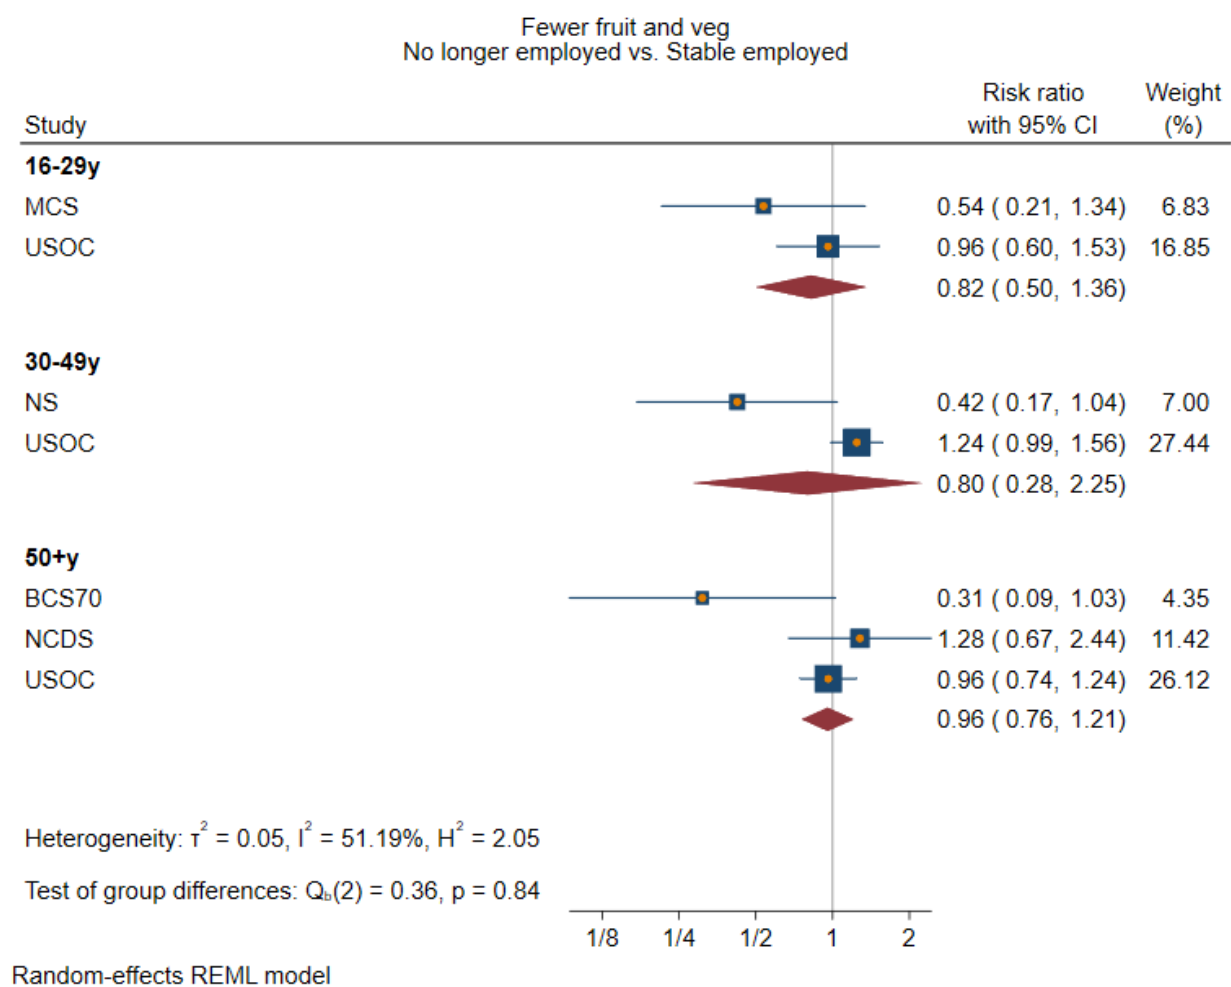

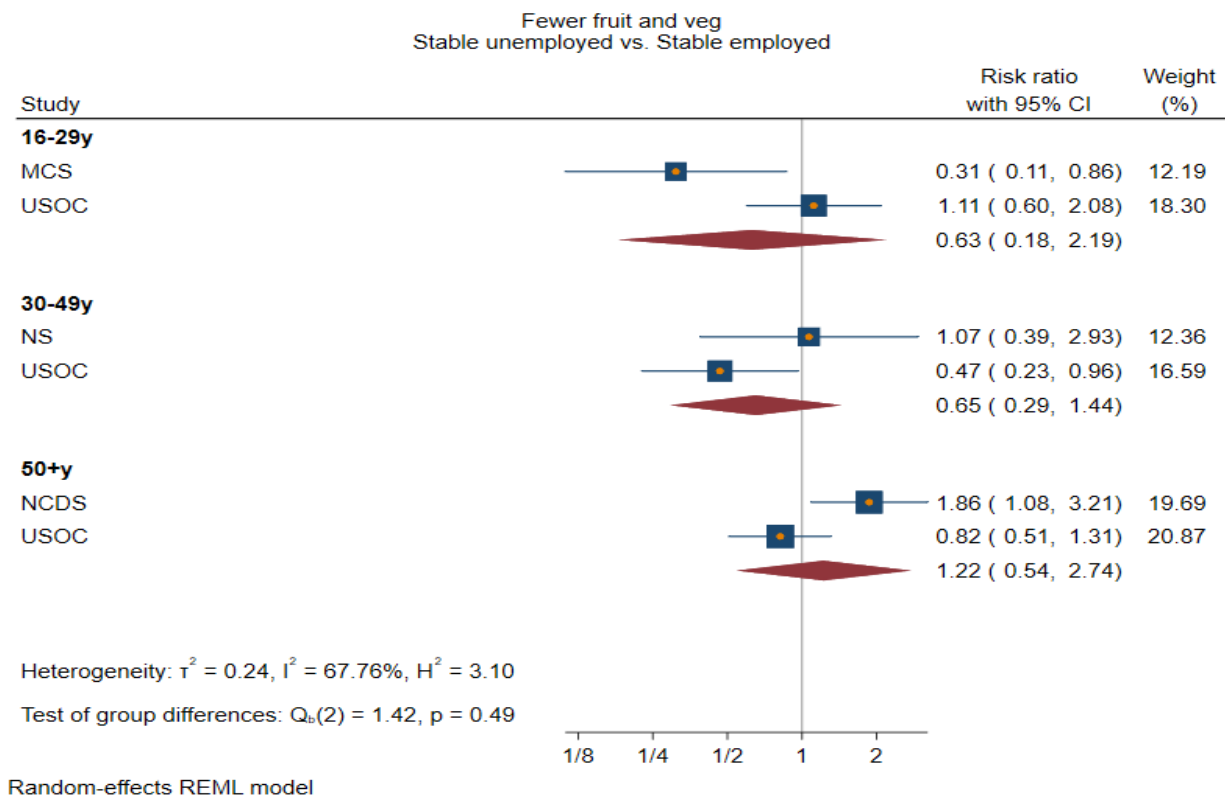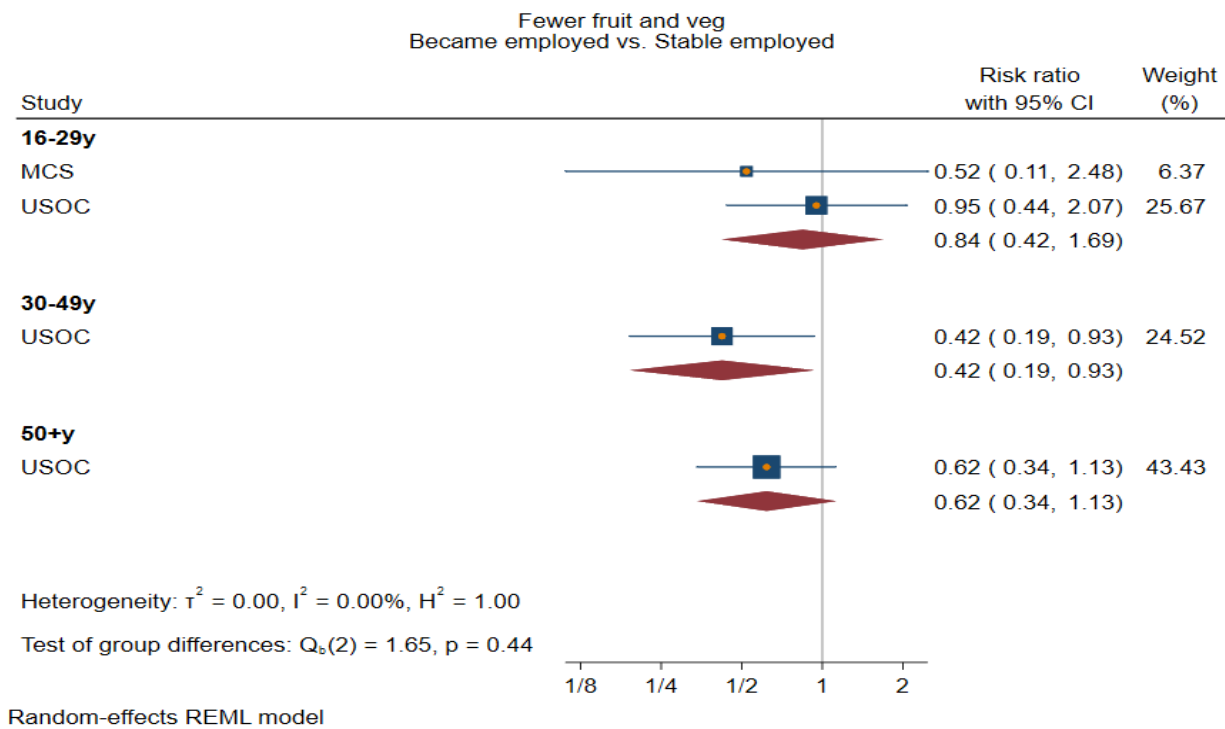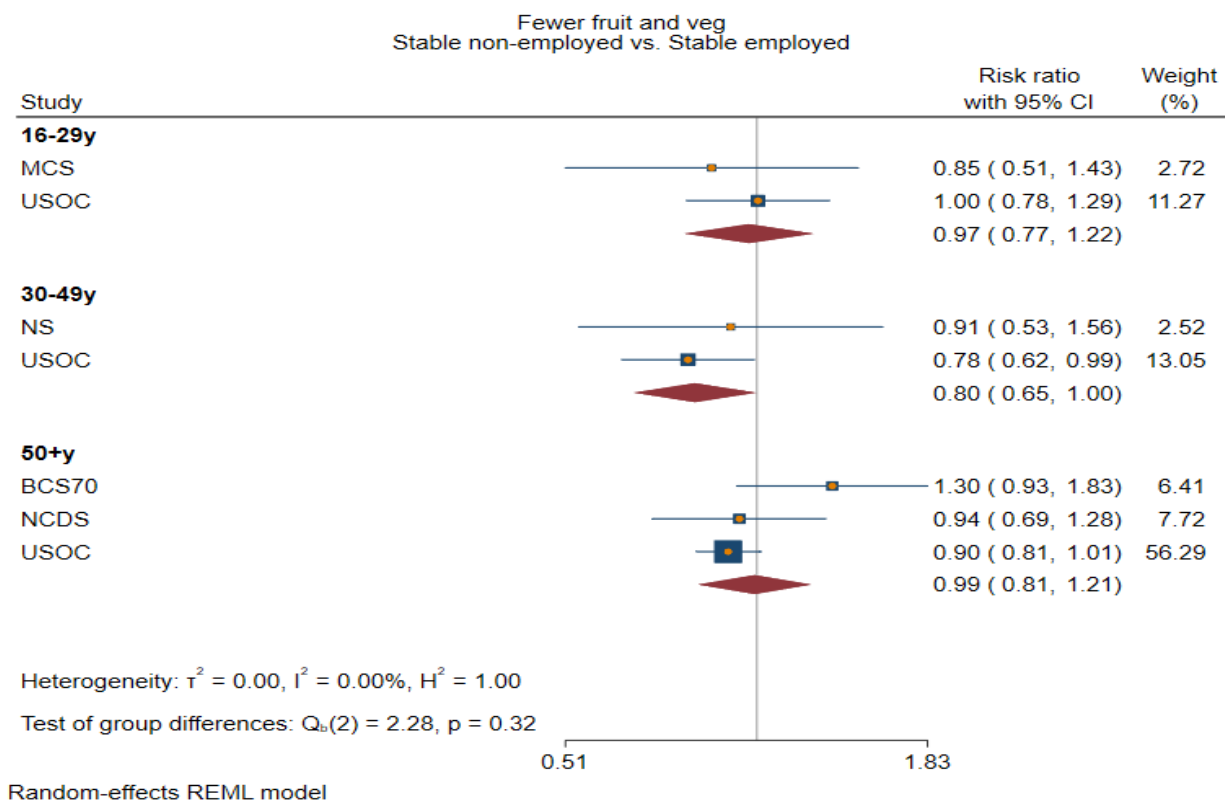

Figure set 3: More fruit & veg

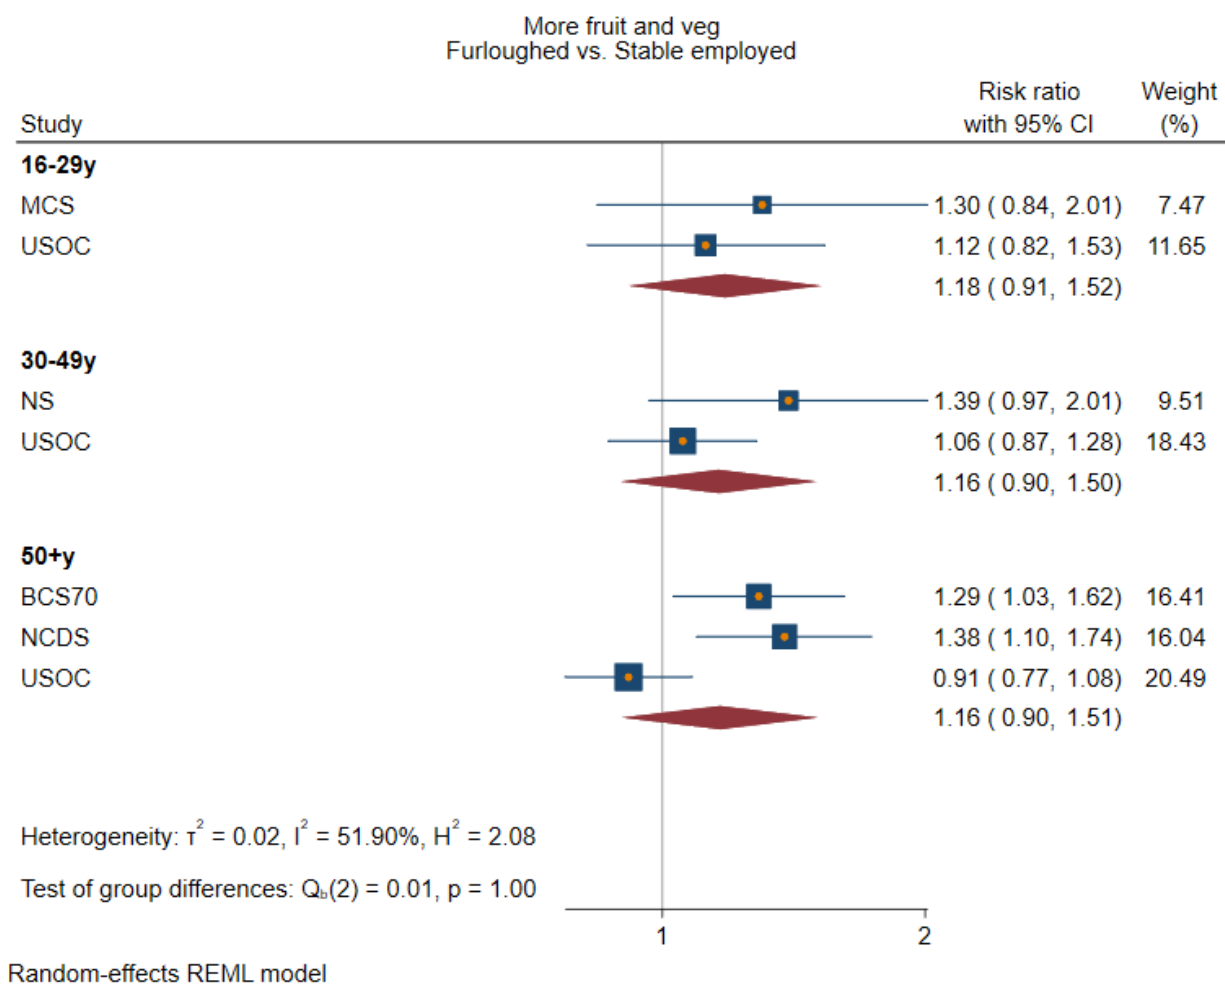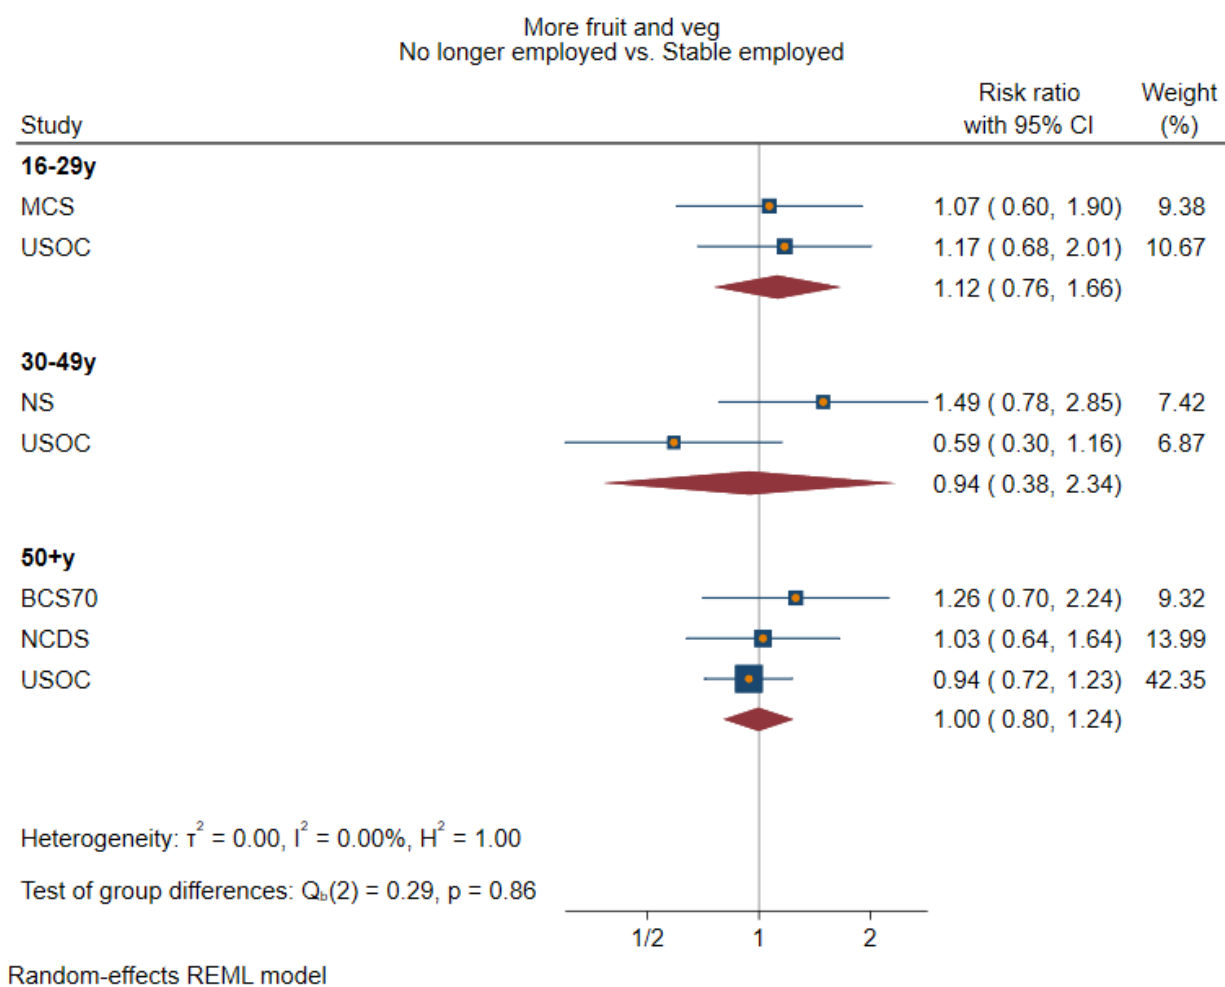

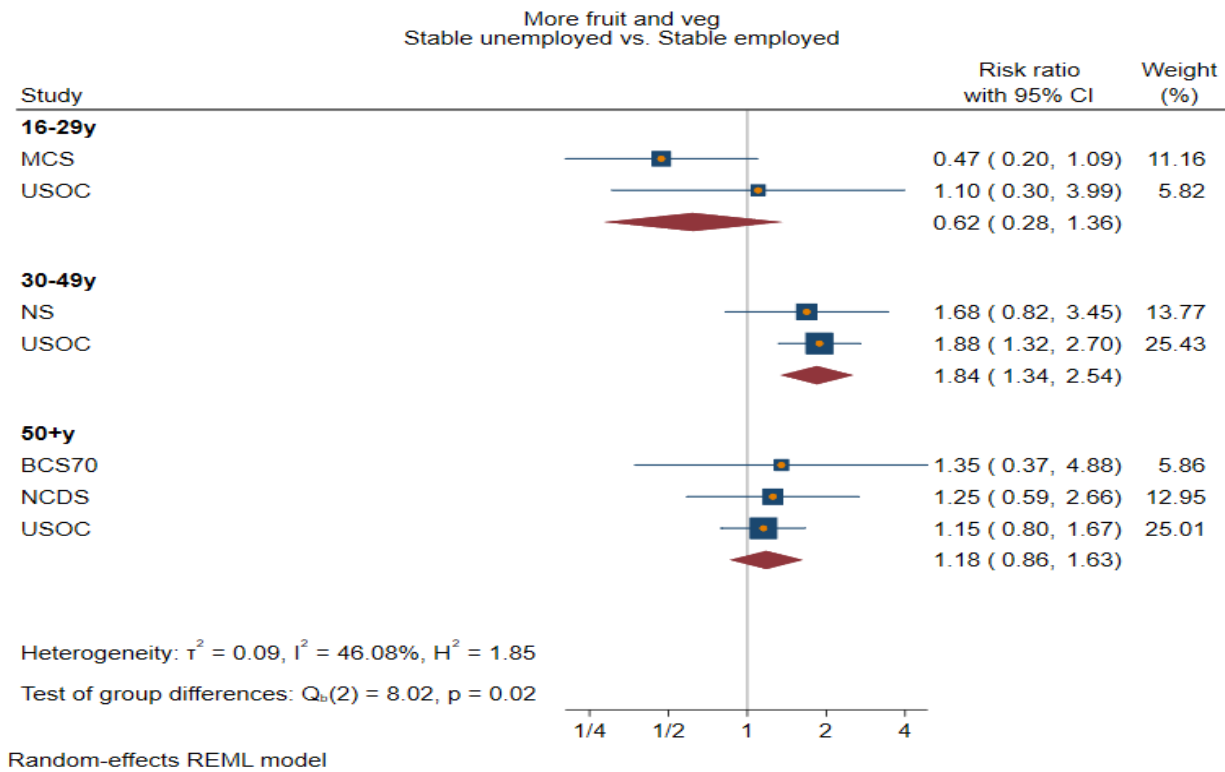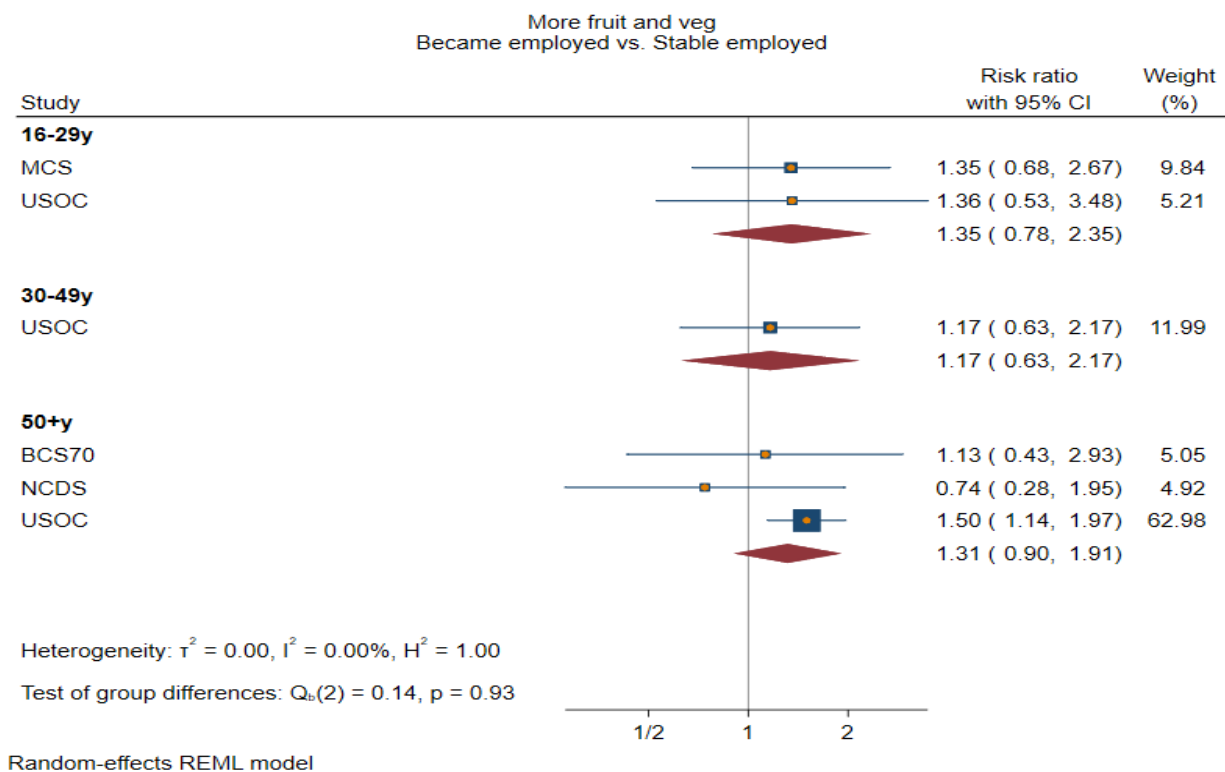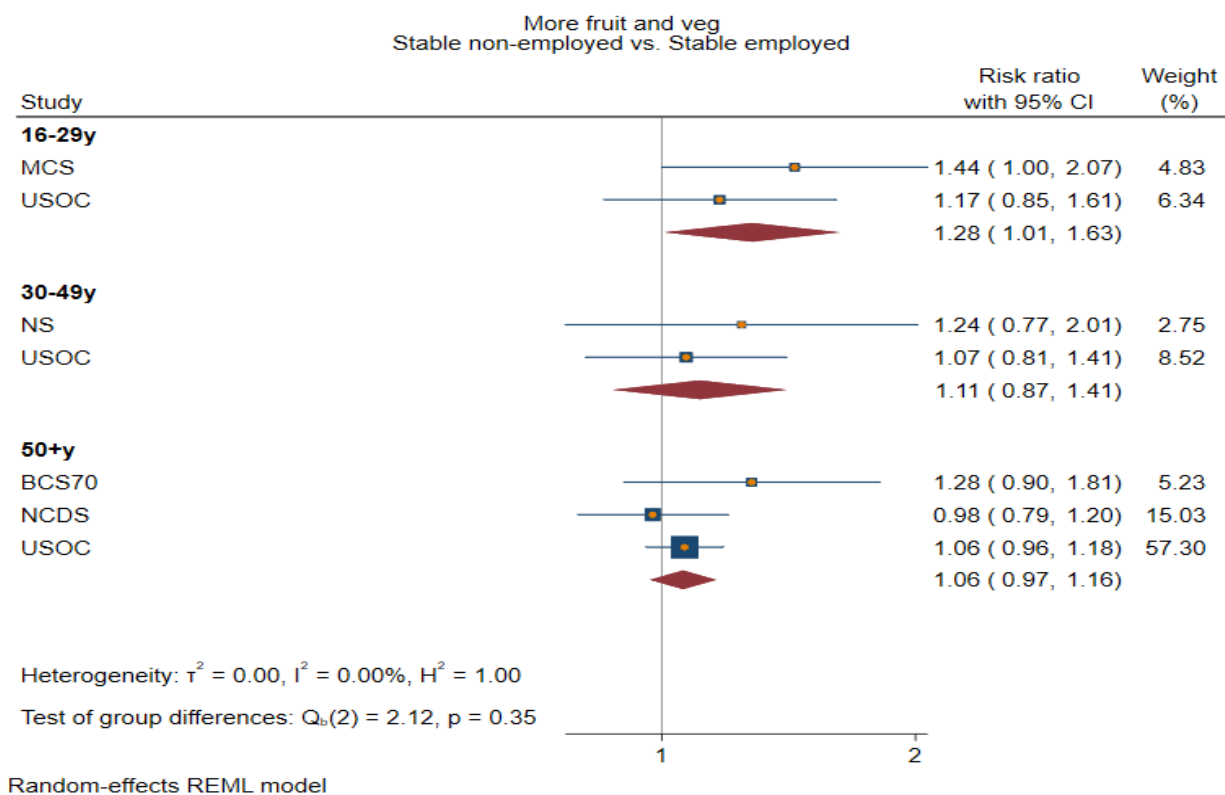



Figure set 4: Less than 3 days a week of at least 30min exercise

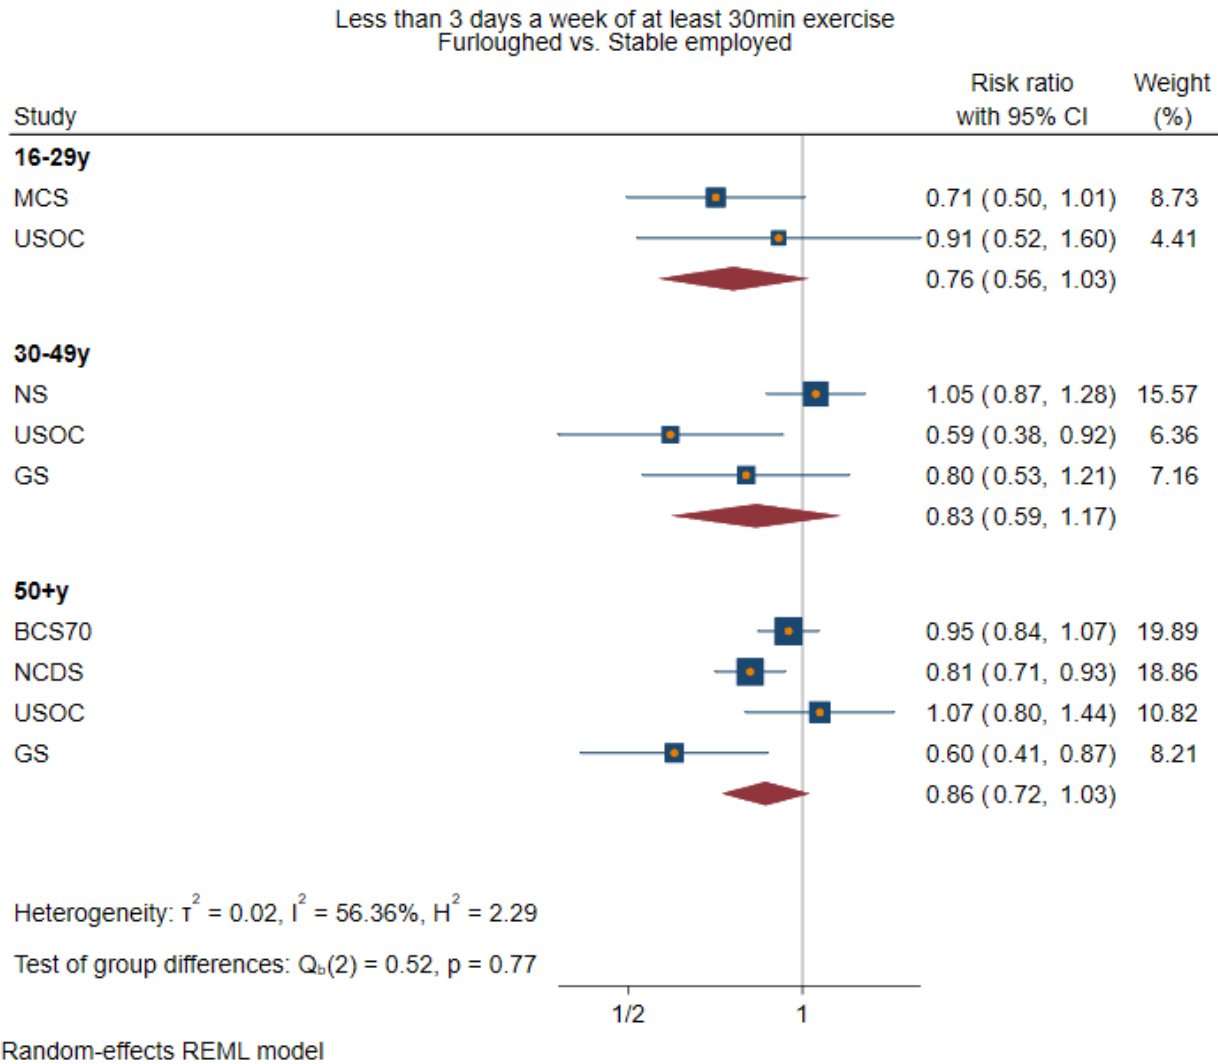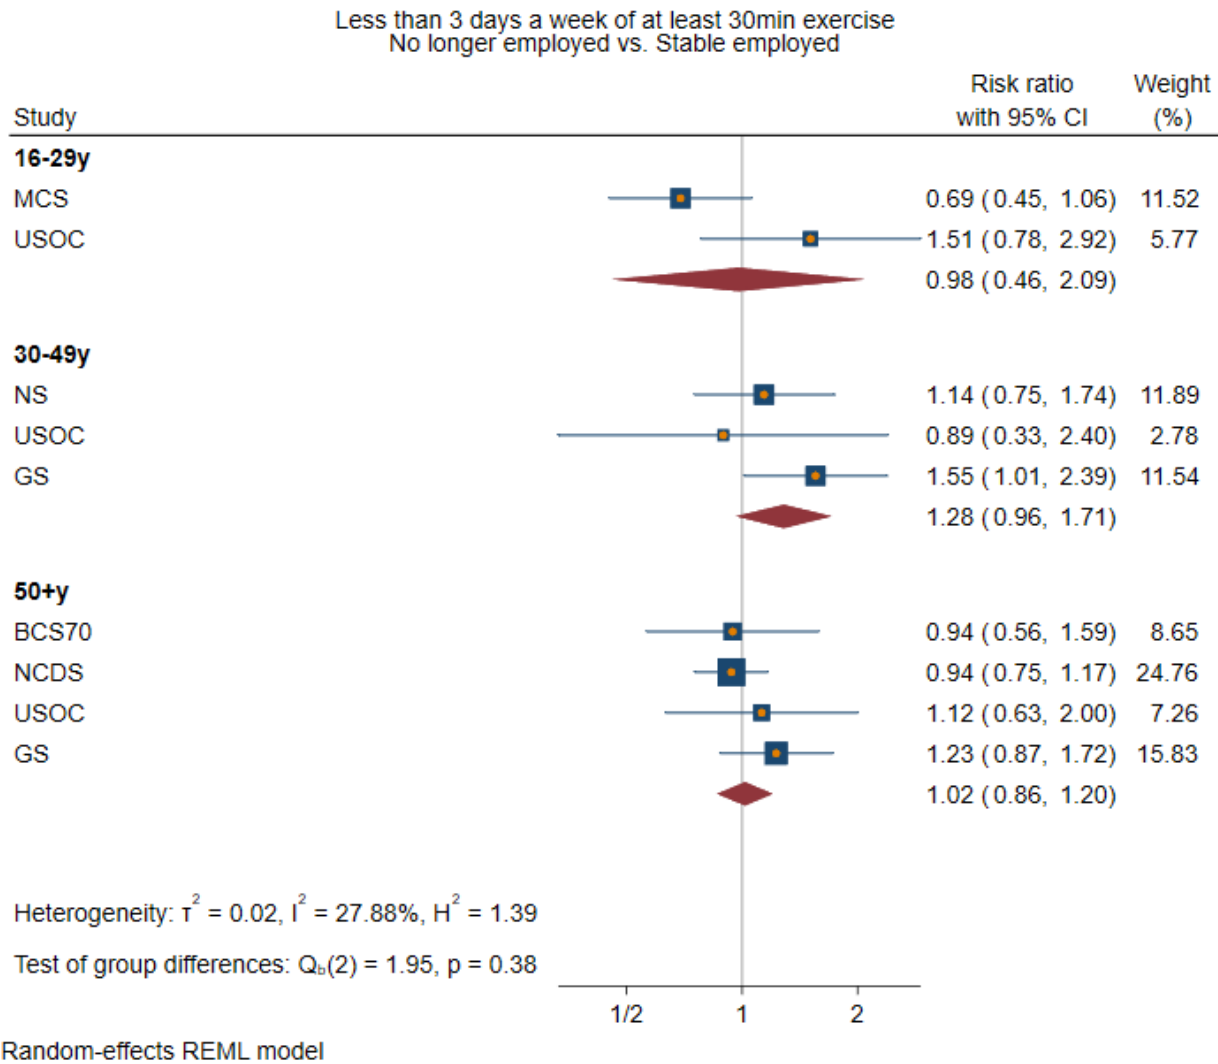

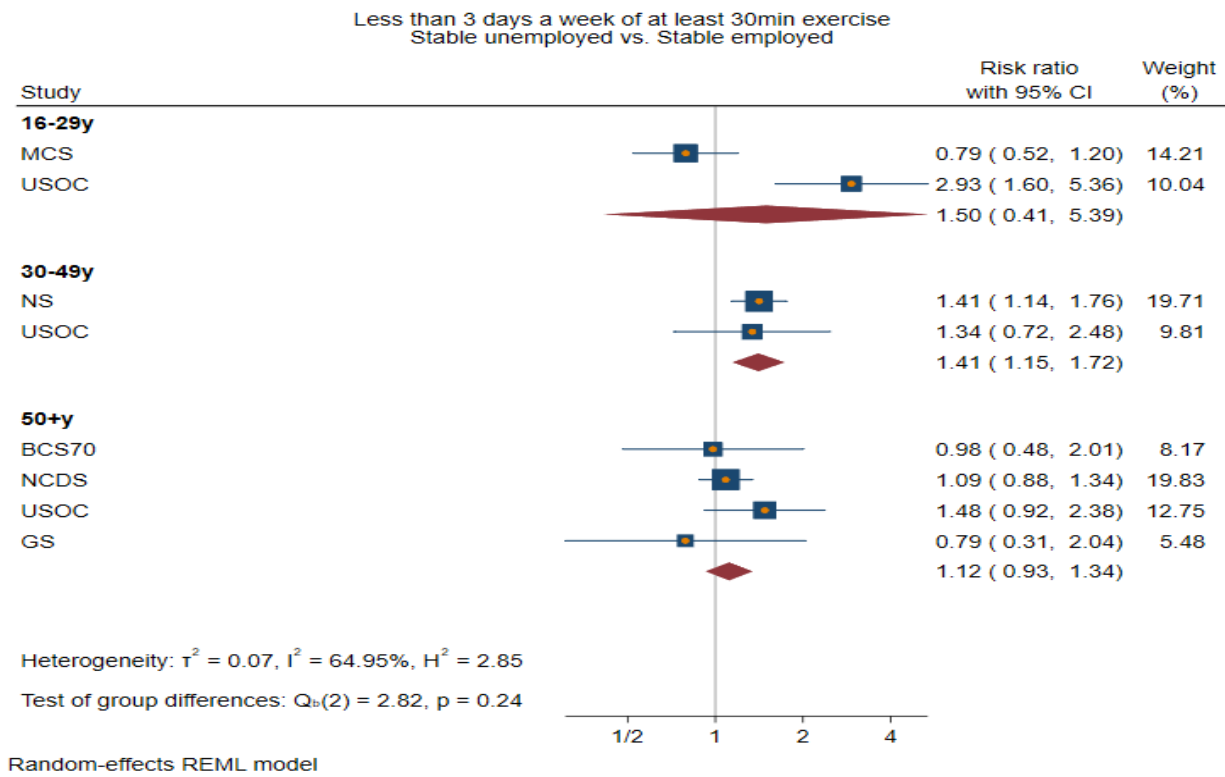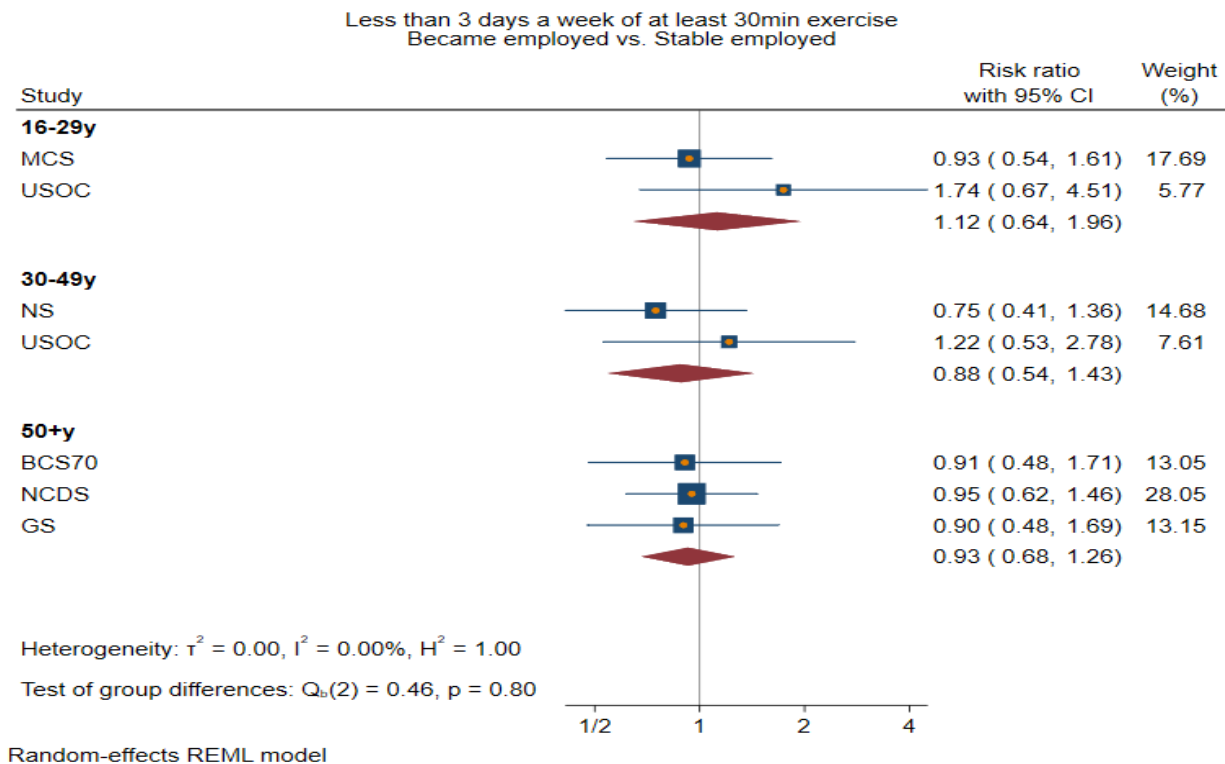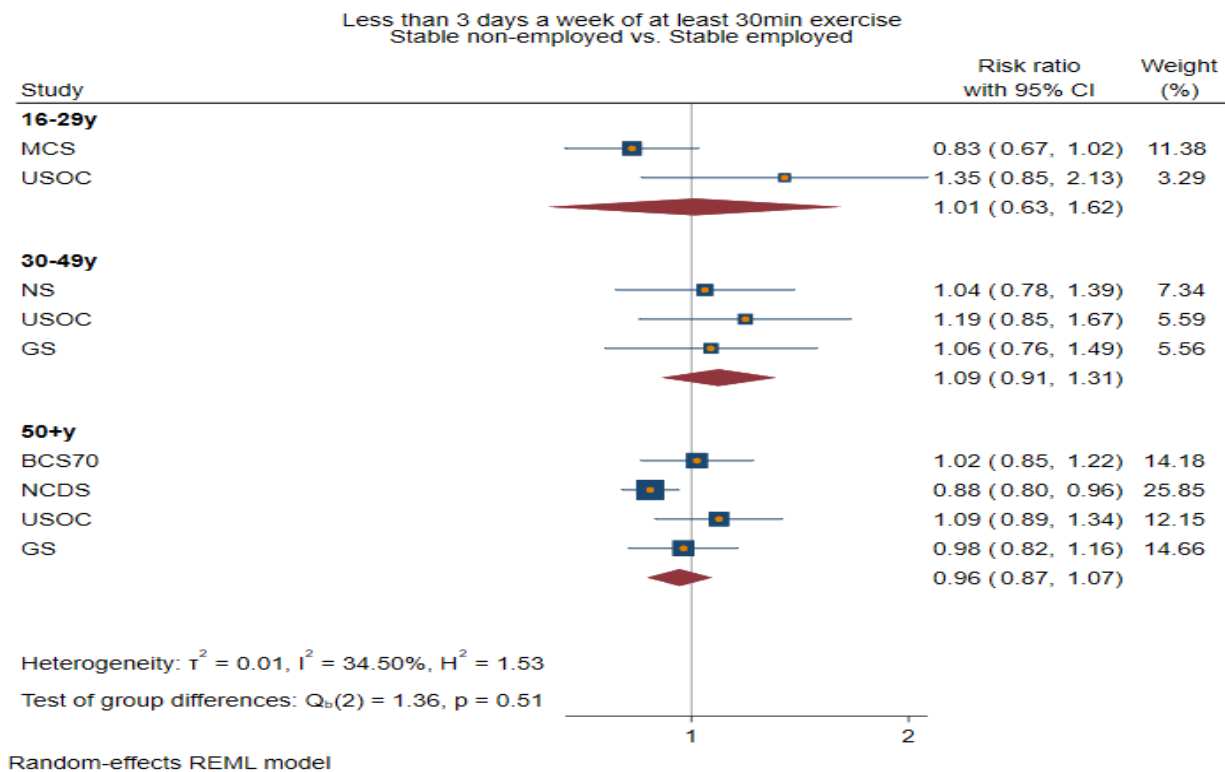

Figure set 5: Less time/ fewer days of physical exercise

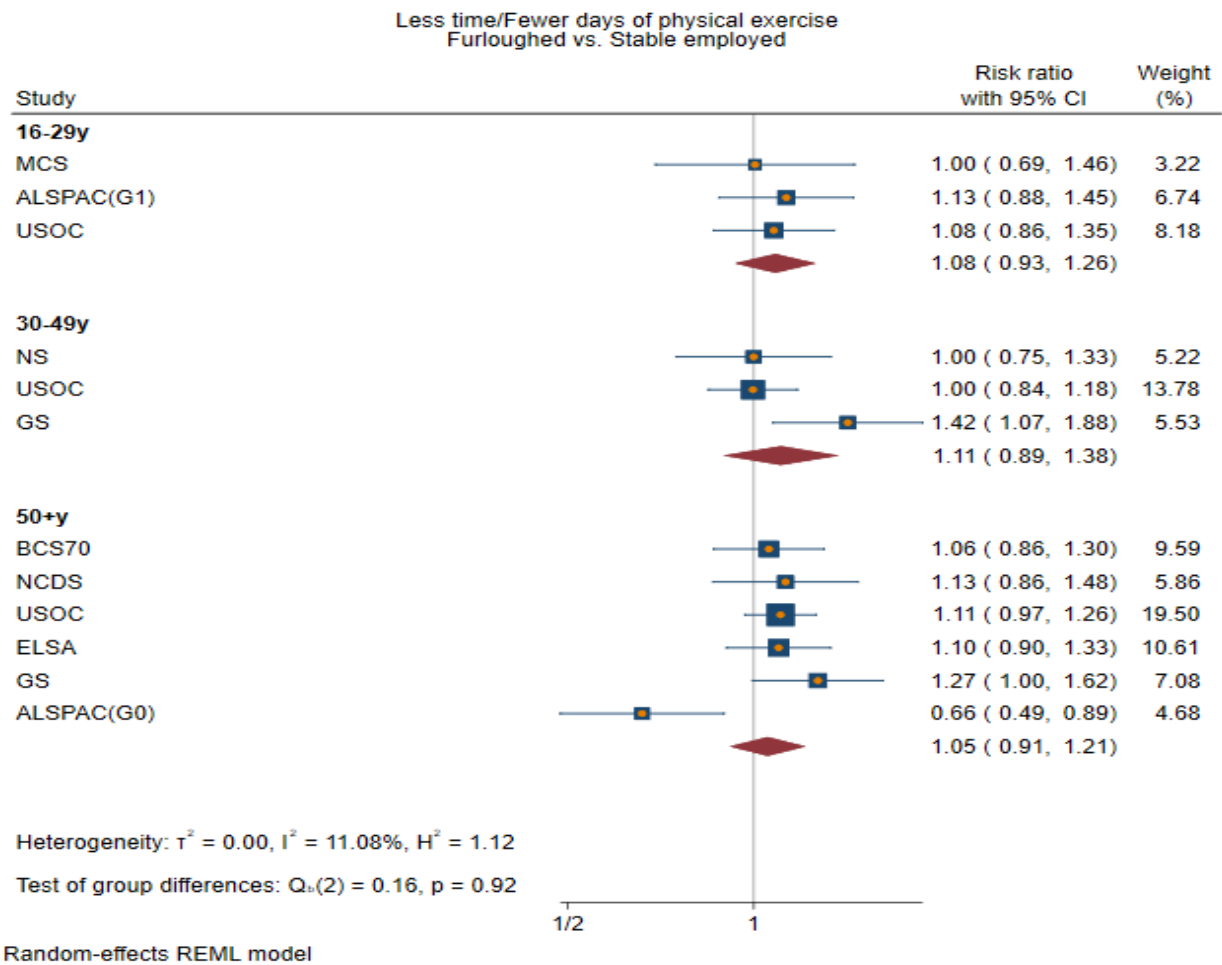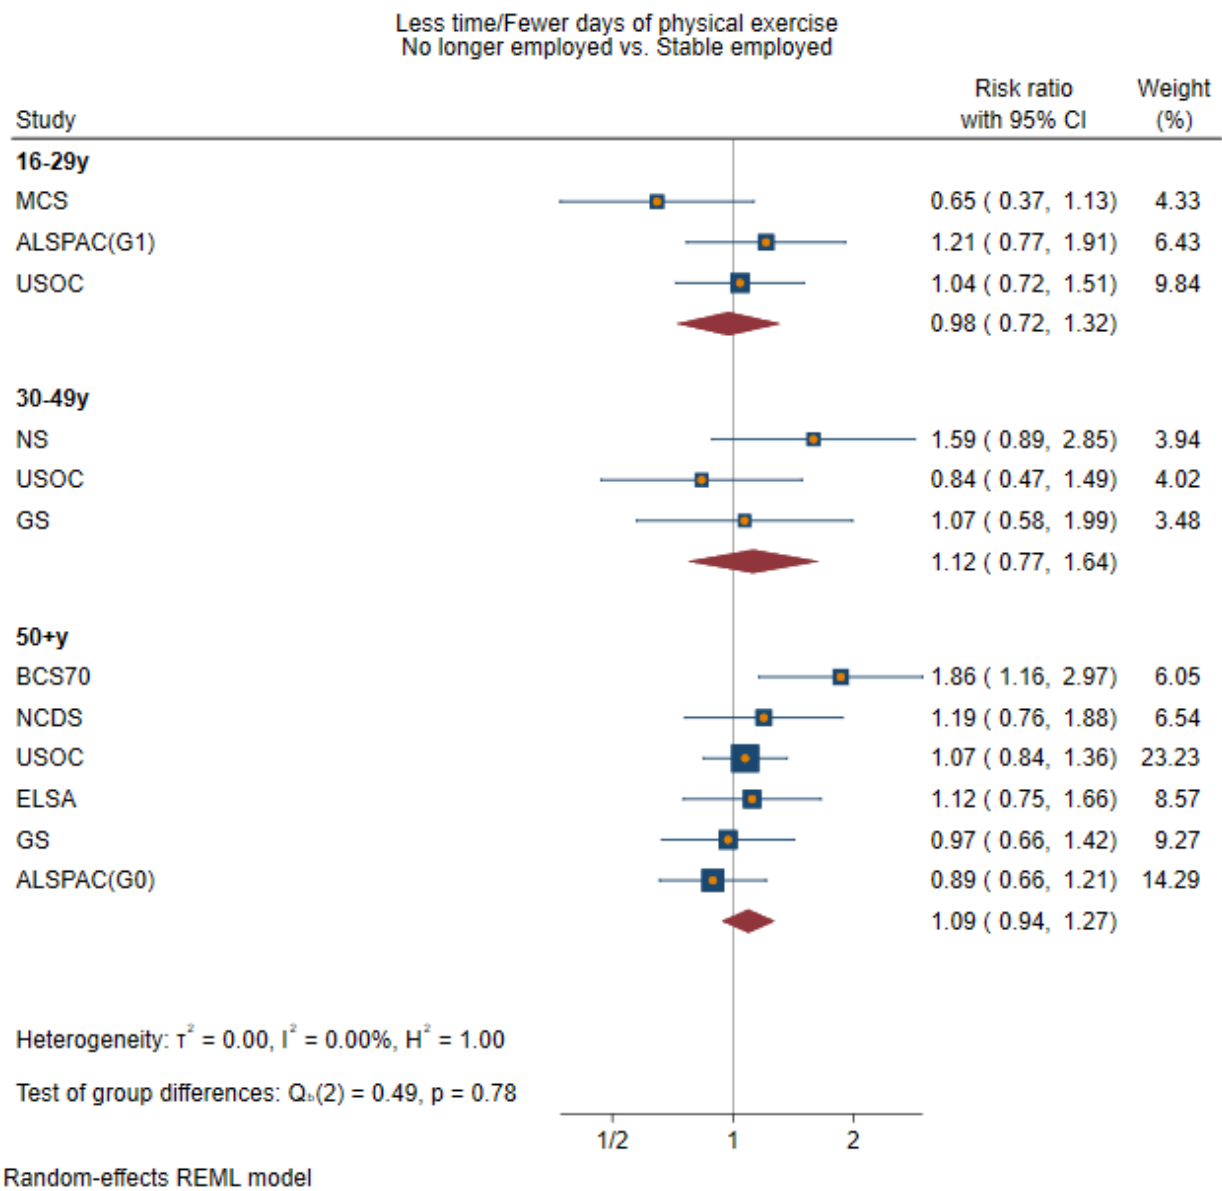

Less time/Fewer days of physical exercise  
Stable unemployed vs. Stable employed

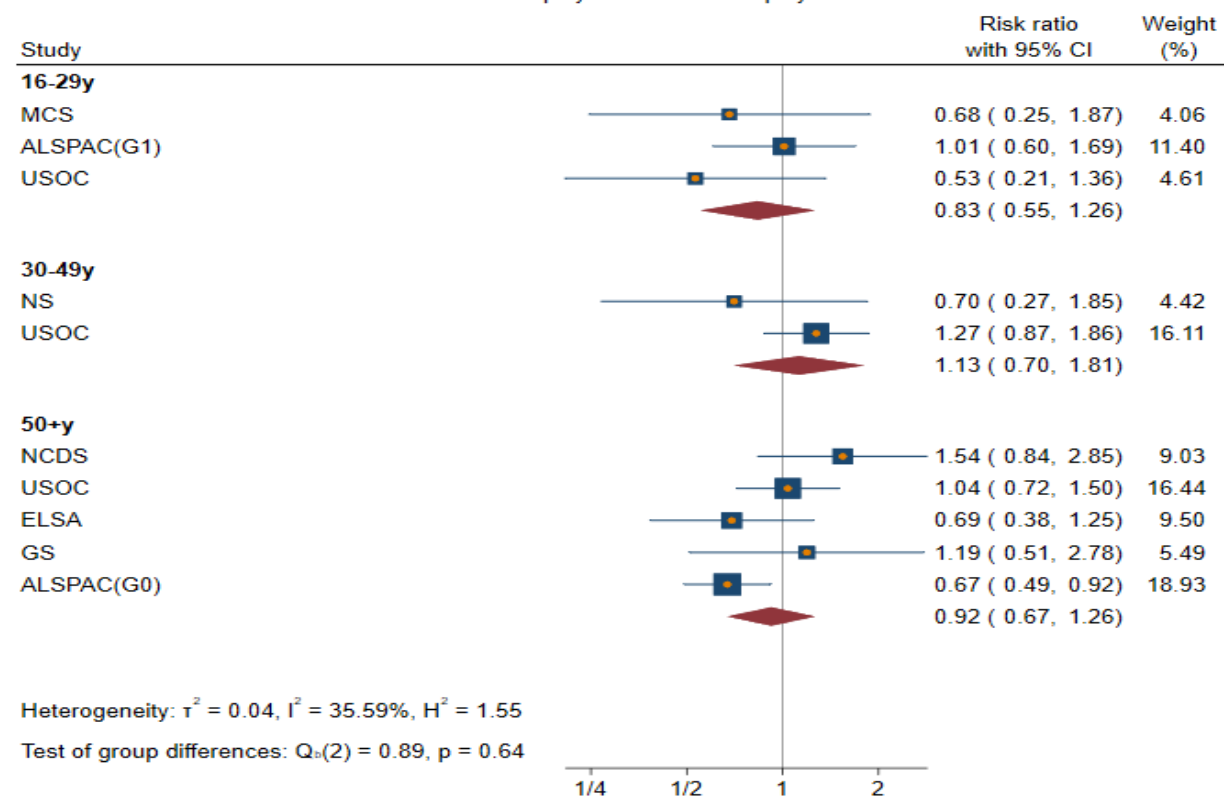

Random-effects REML model

Less time/Fewer days of physical exercise  
Became employed vs. Stable employed

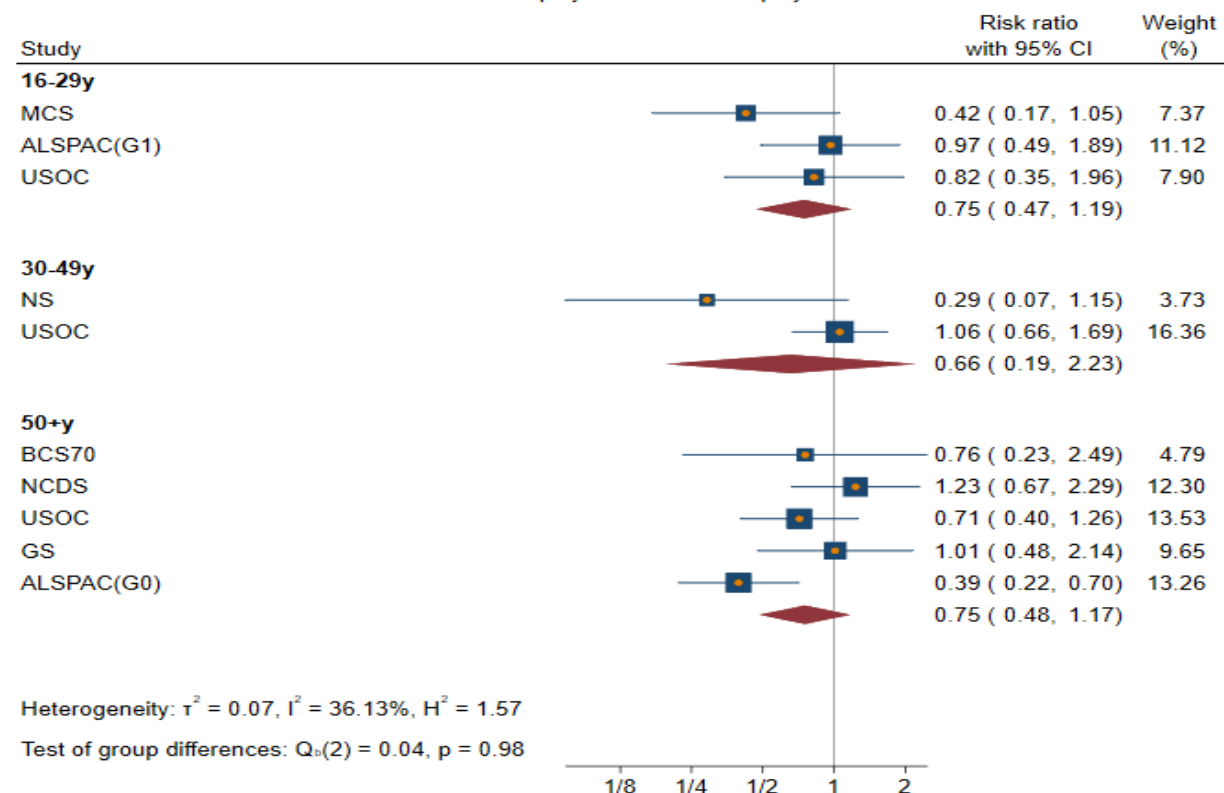

Random-effects REML model

Less time/Fewer days of physical exercise  
Stable non-employed vs. Stable employed

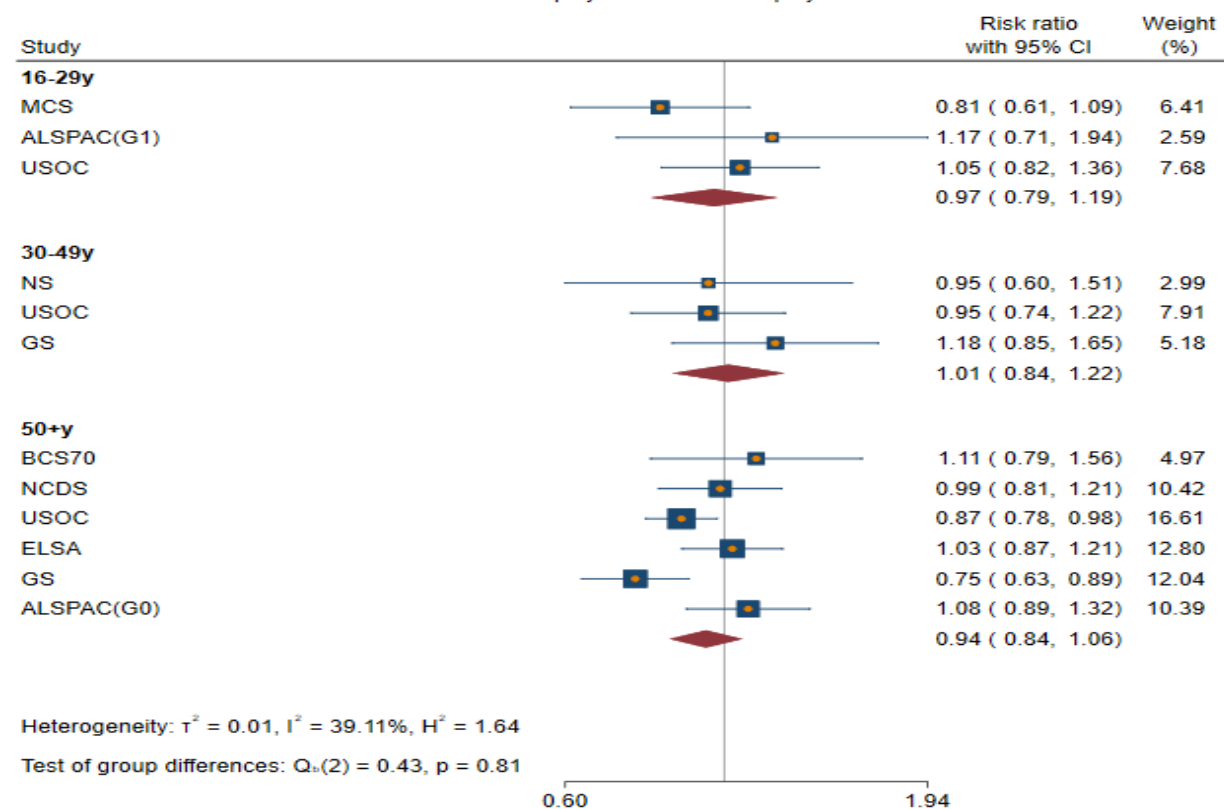

Random-effects REML model

Figure set 6: More time/ days of physical exercise

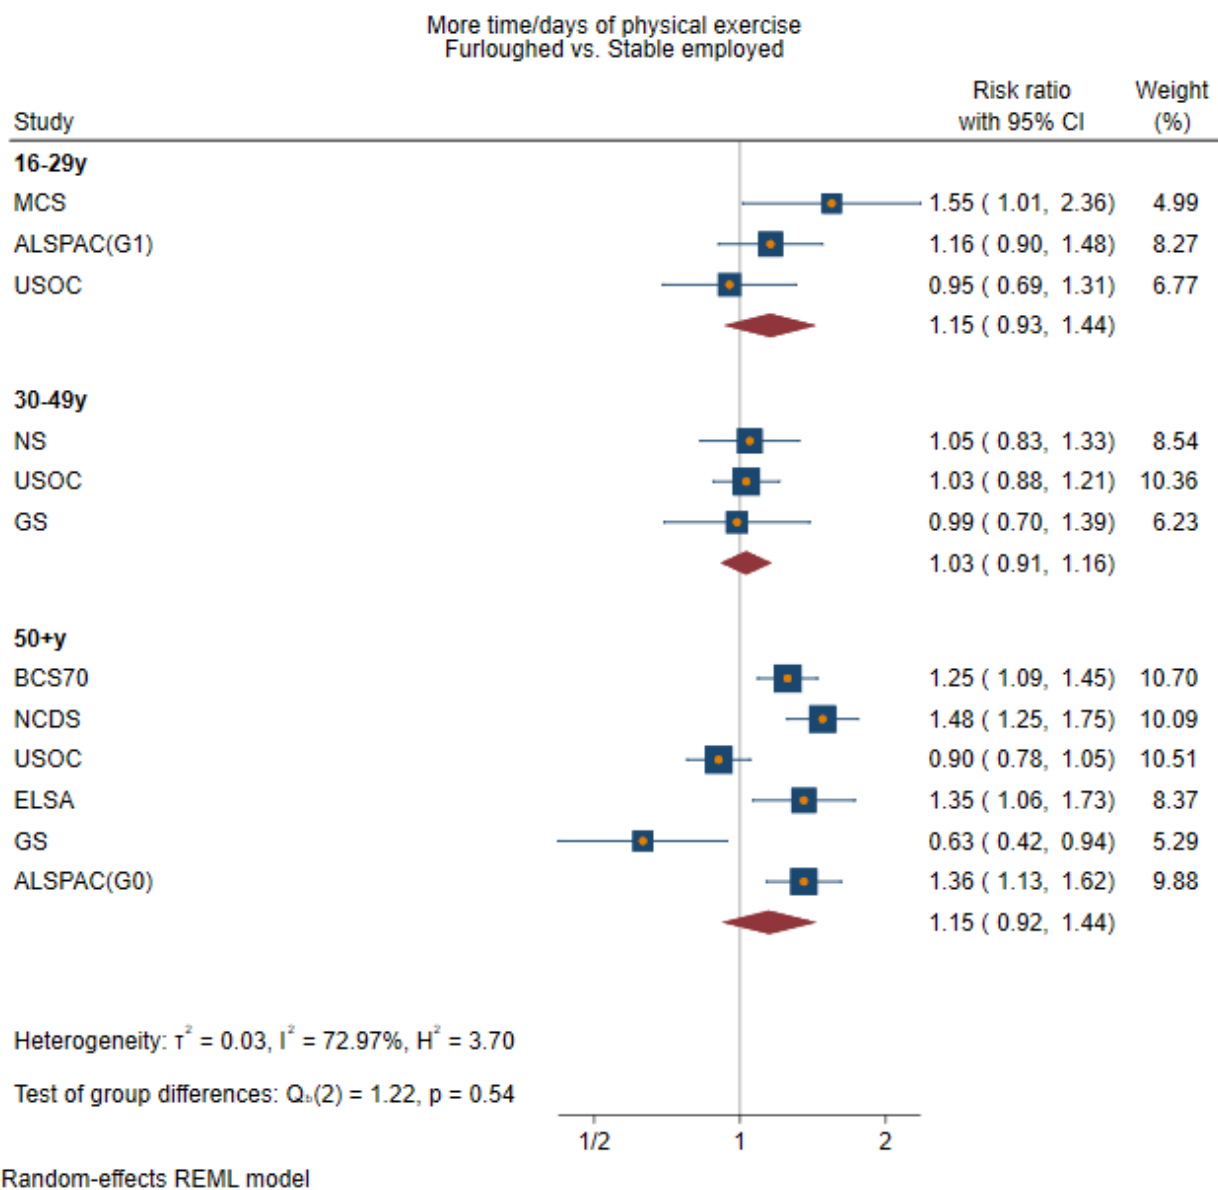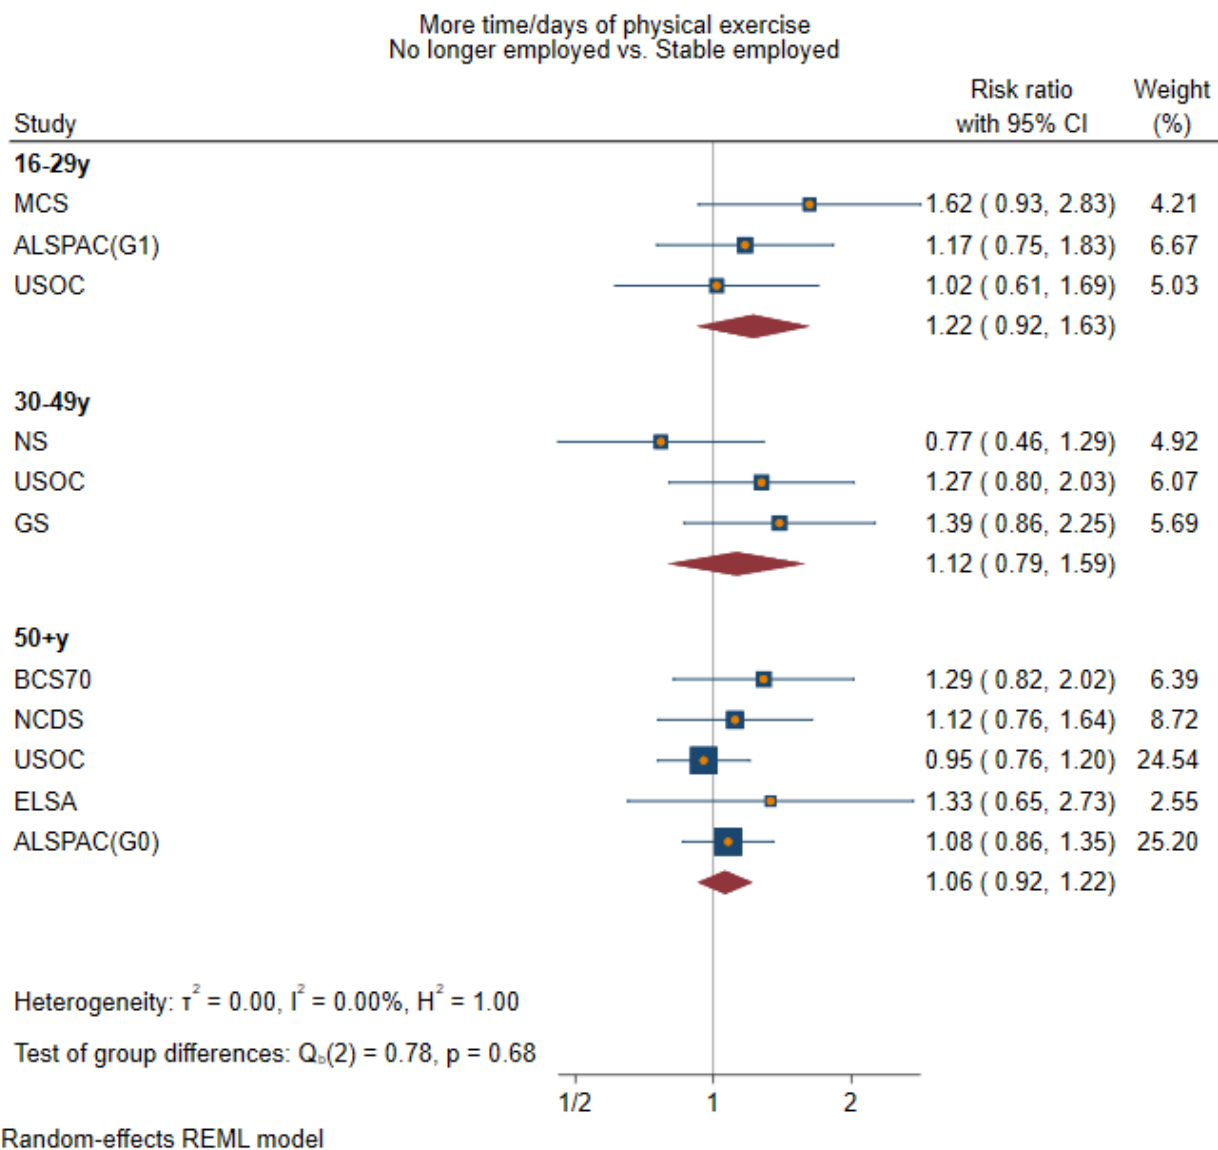

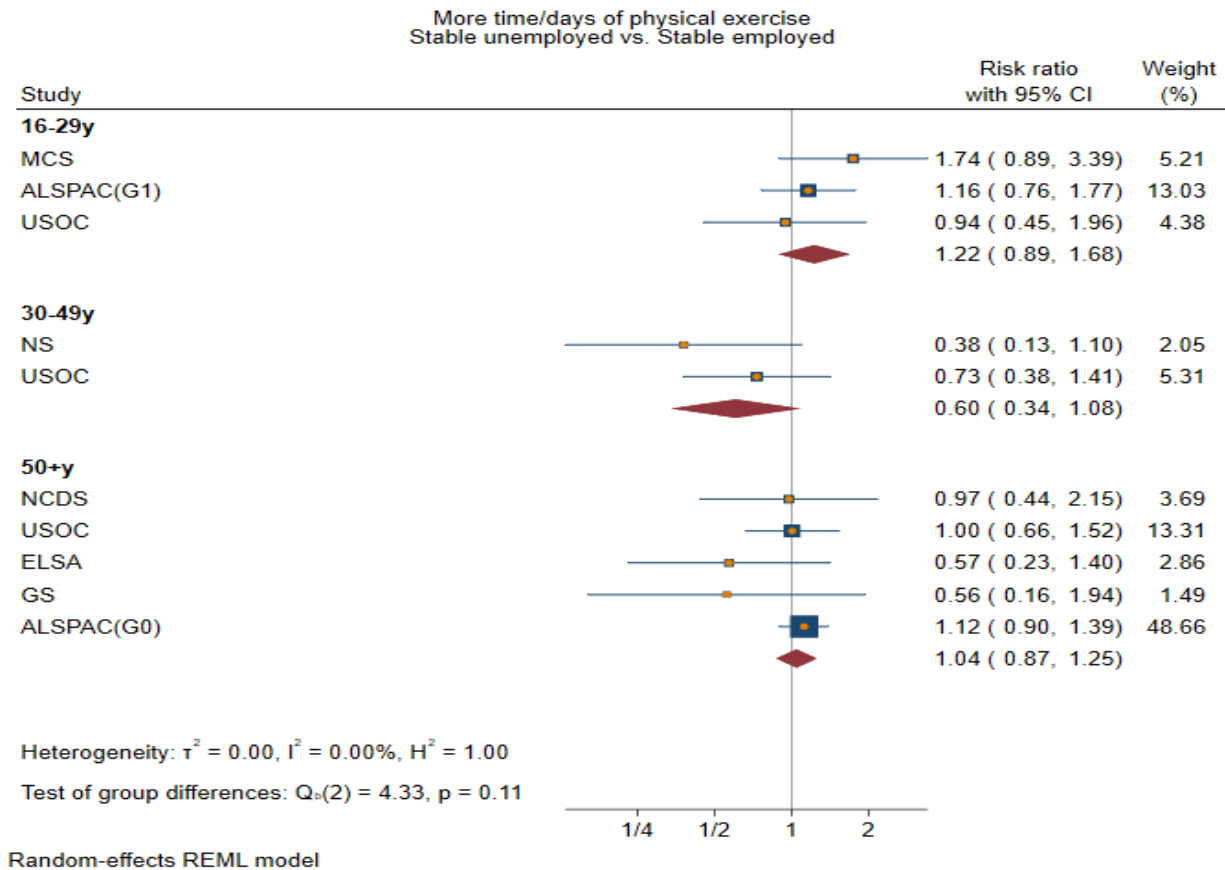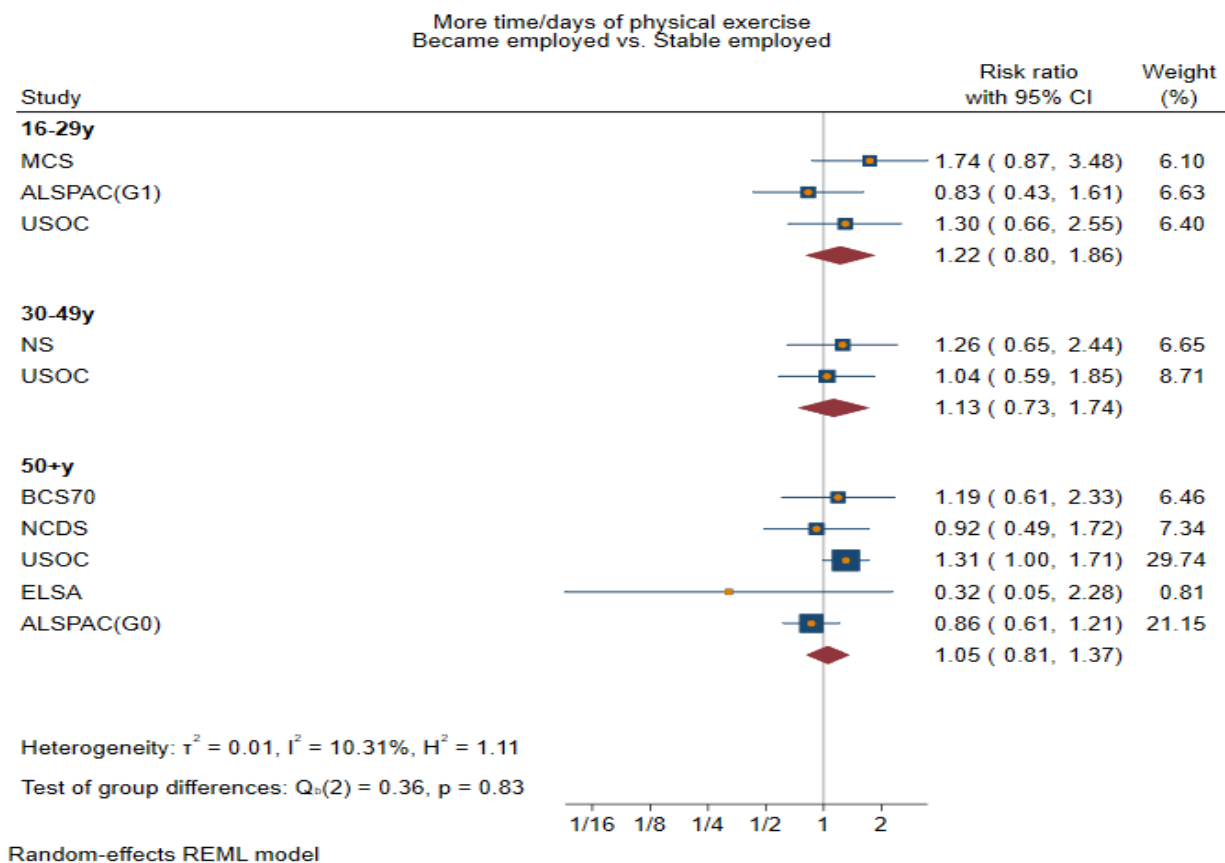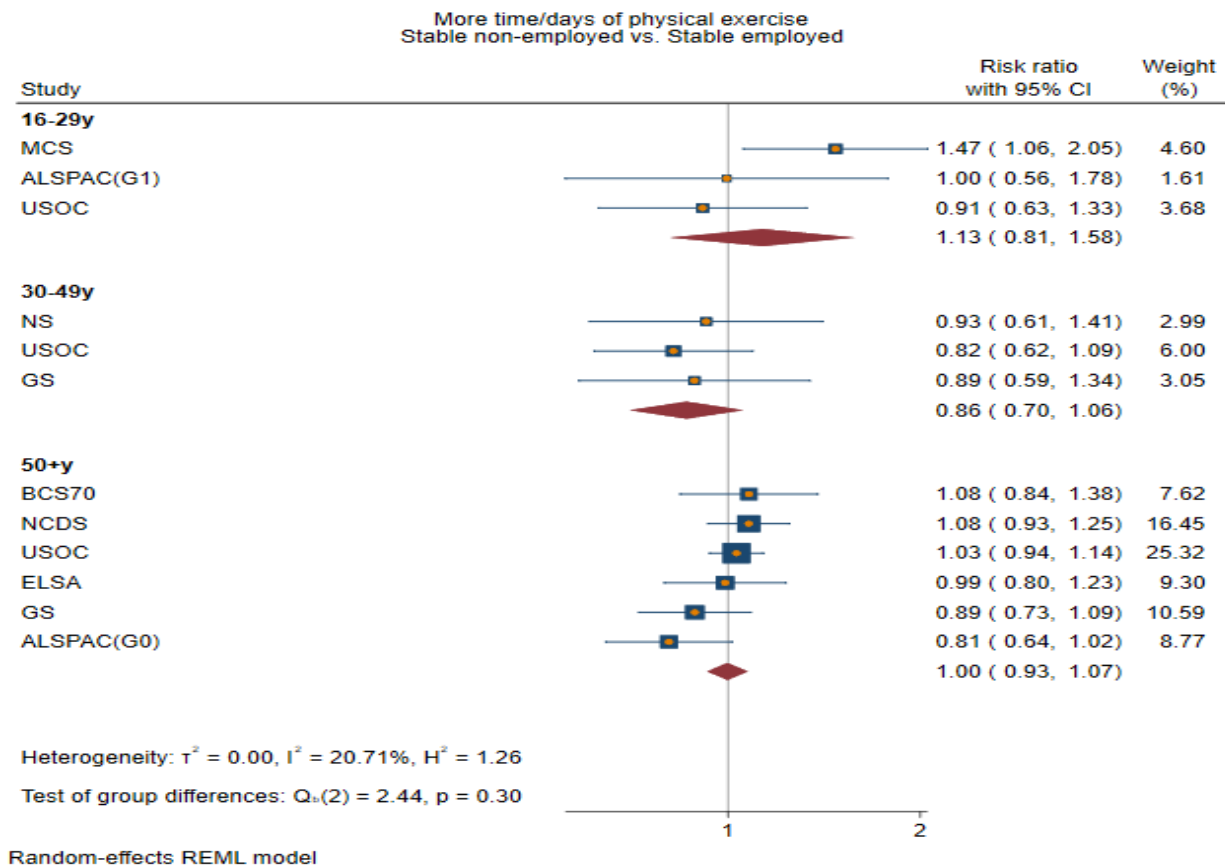

Figure set 7: Sleeps outside ‘Normal Range’ (i.e. <6 or 9+ hours)

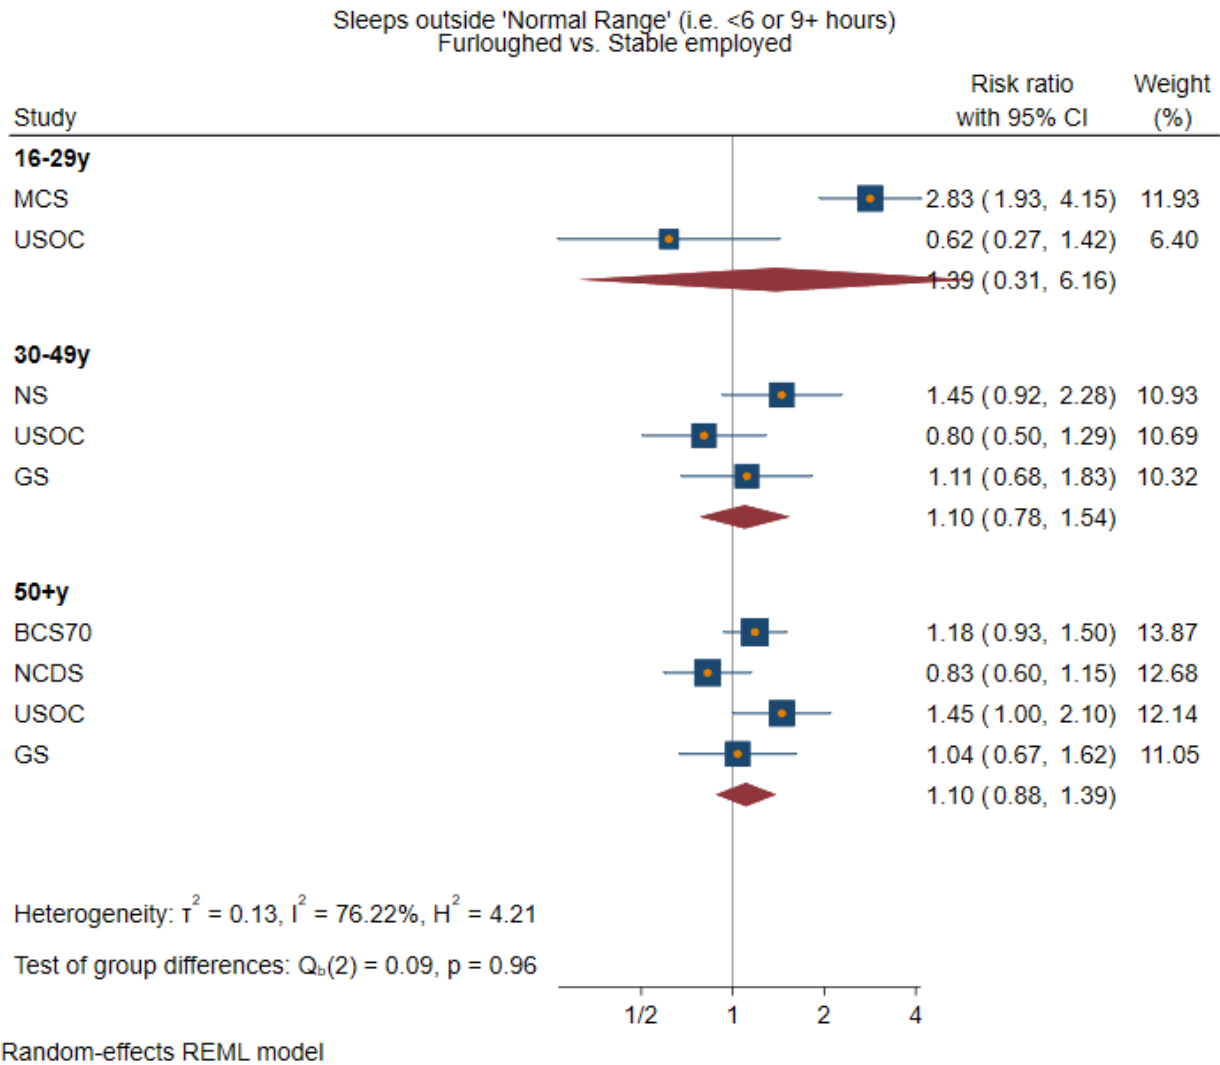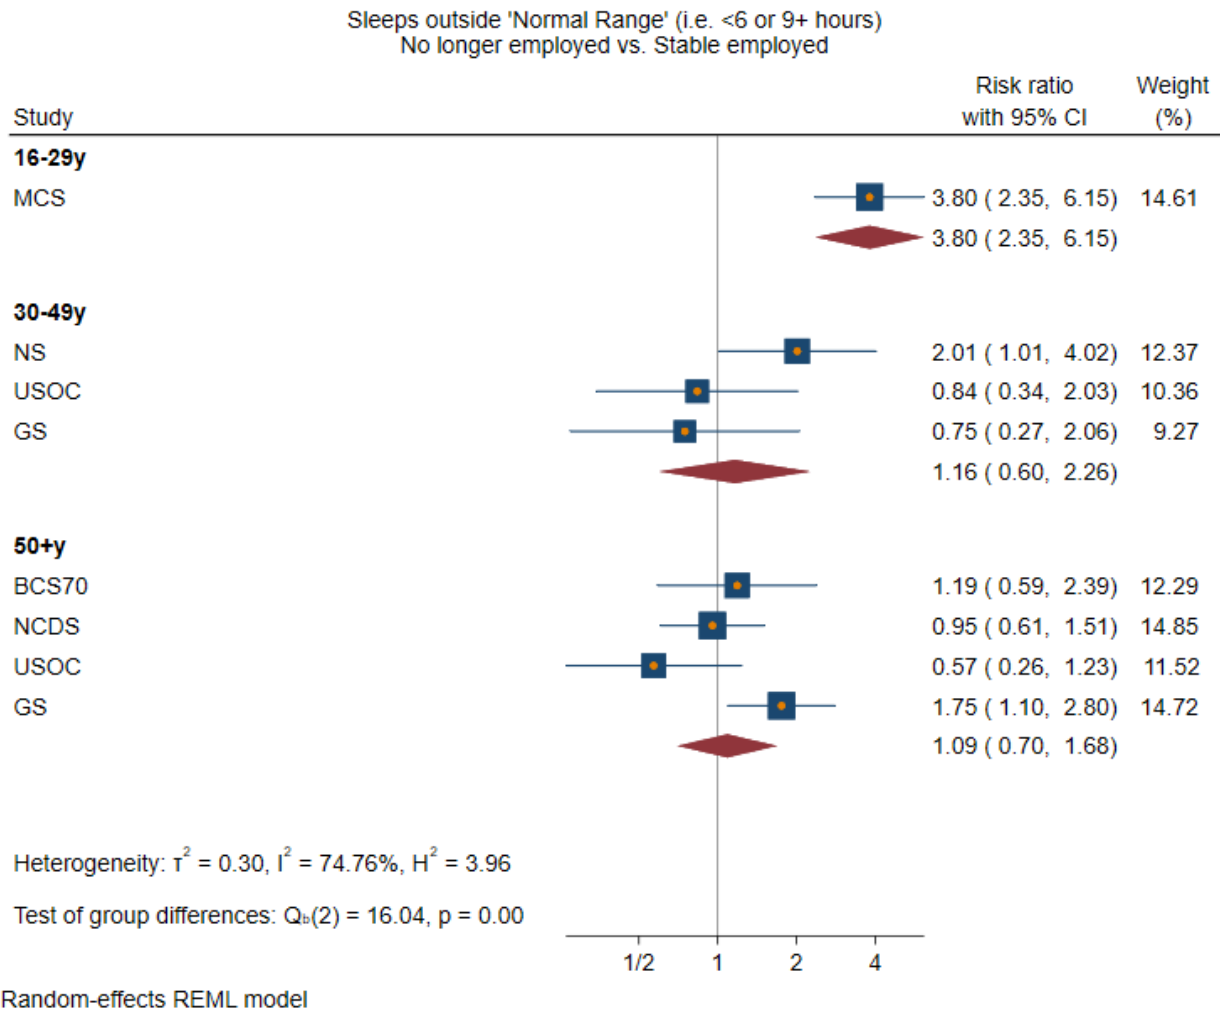



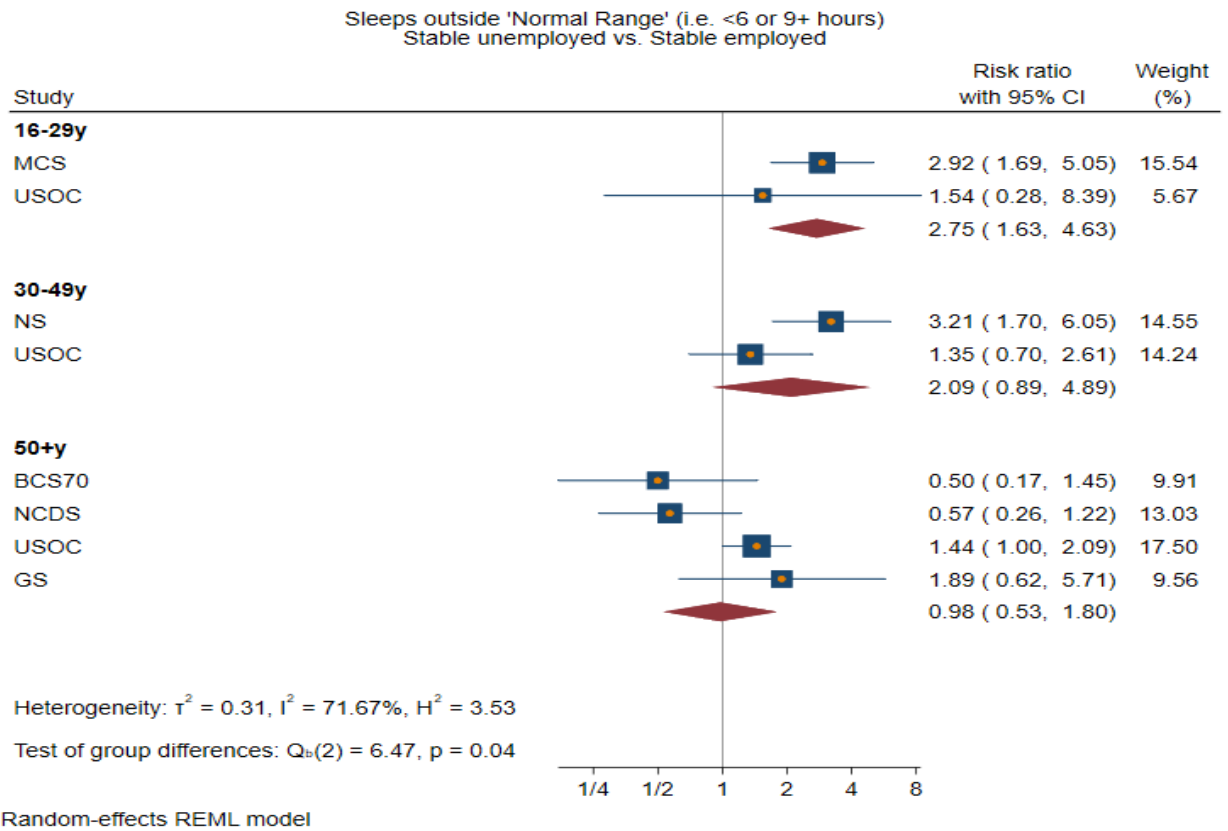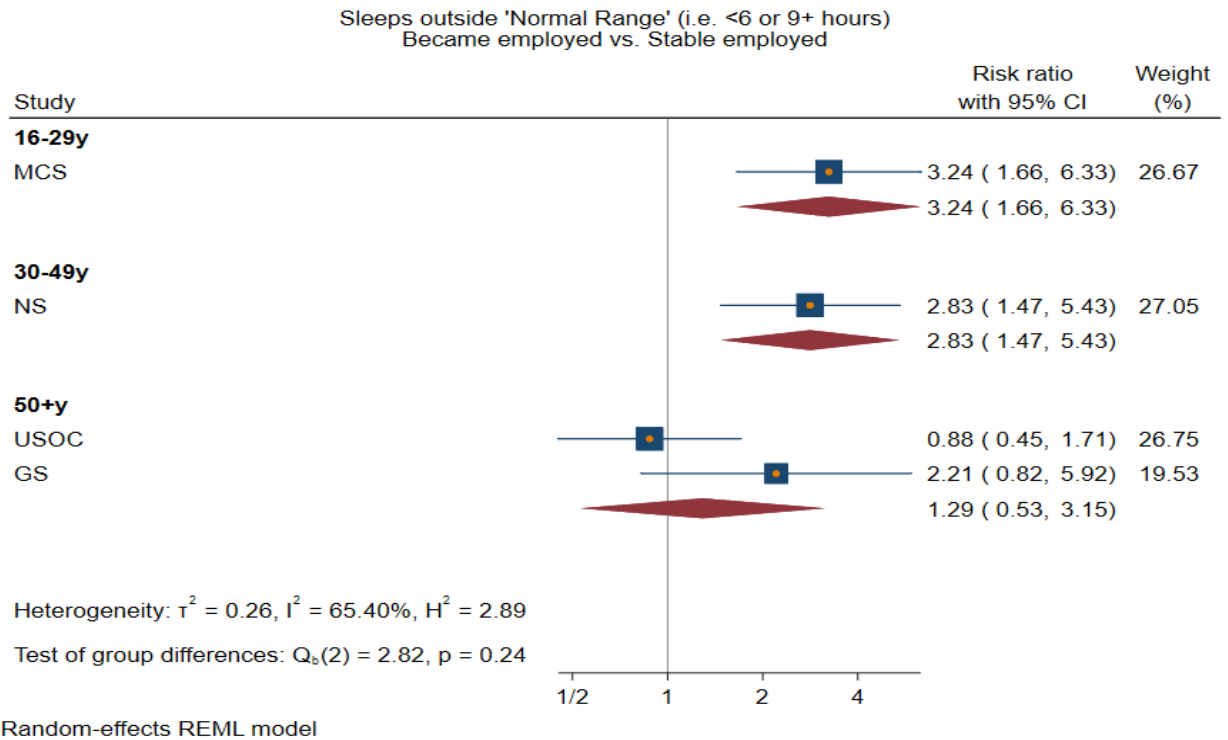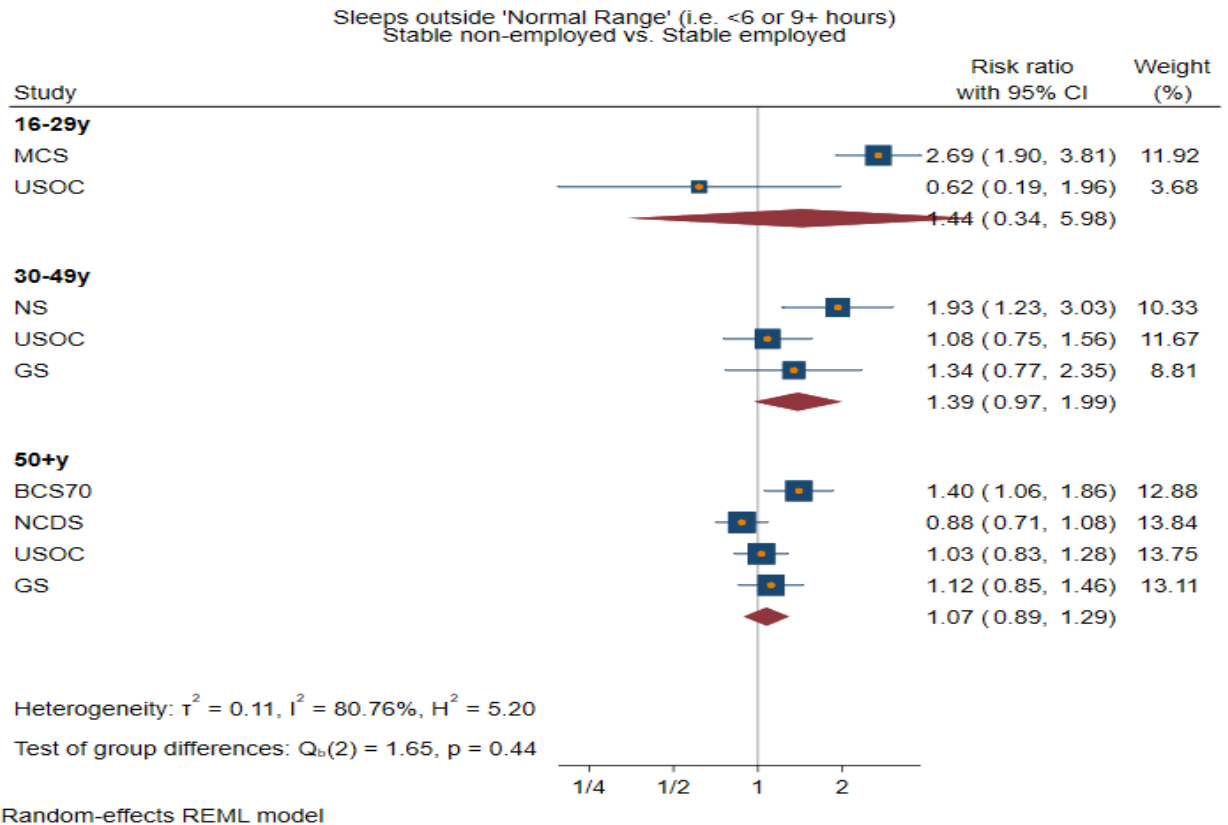



Figure set 8: Sleeps less than before

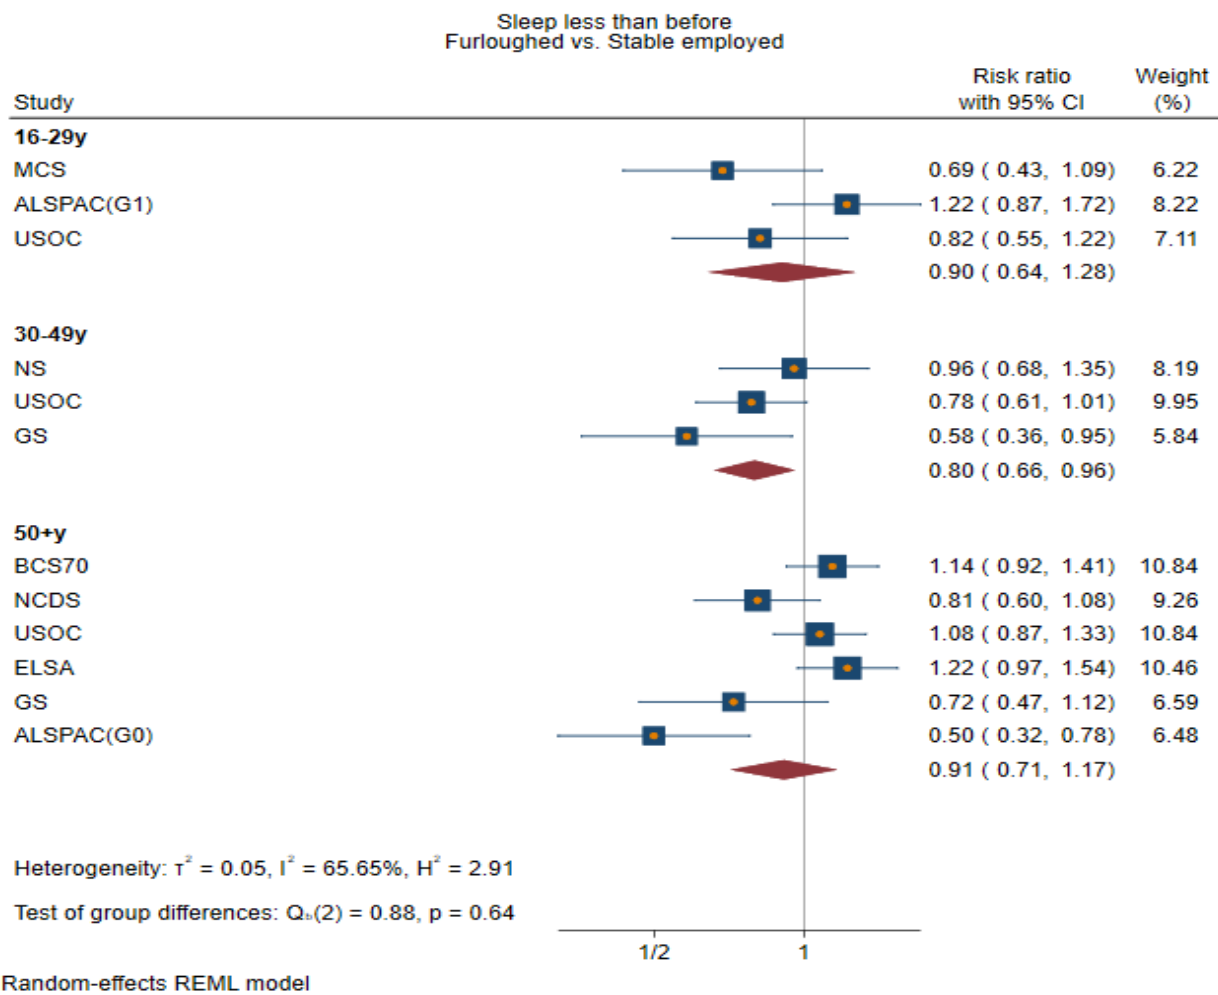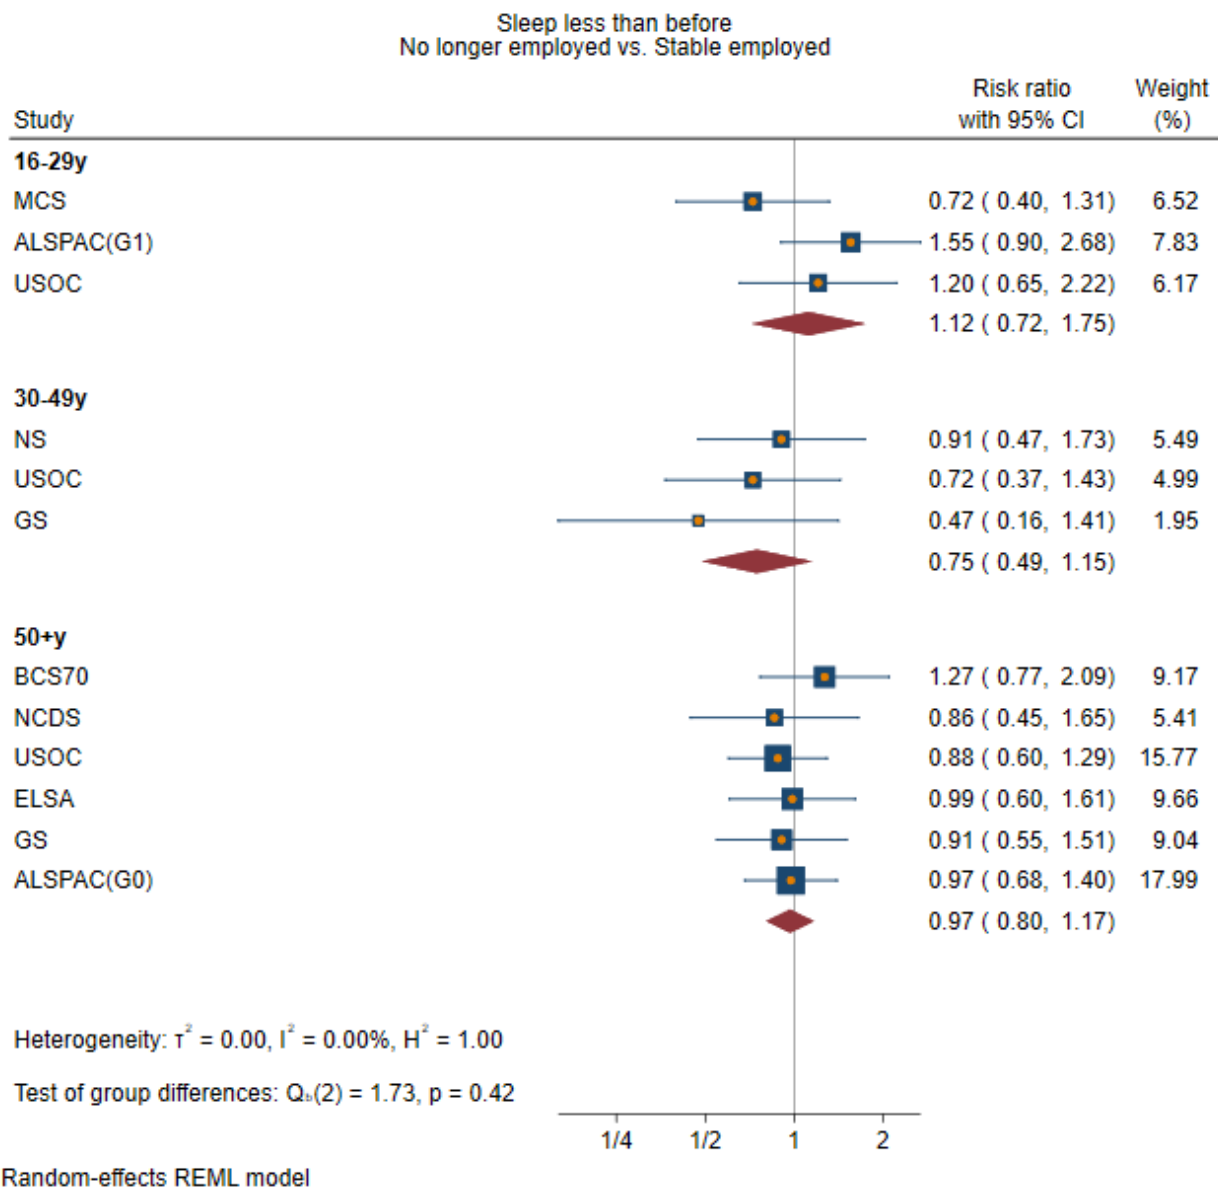

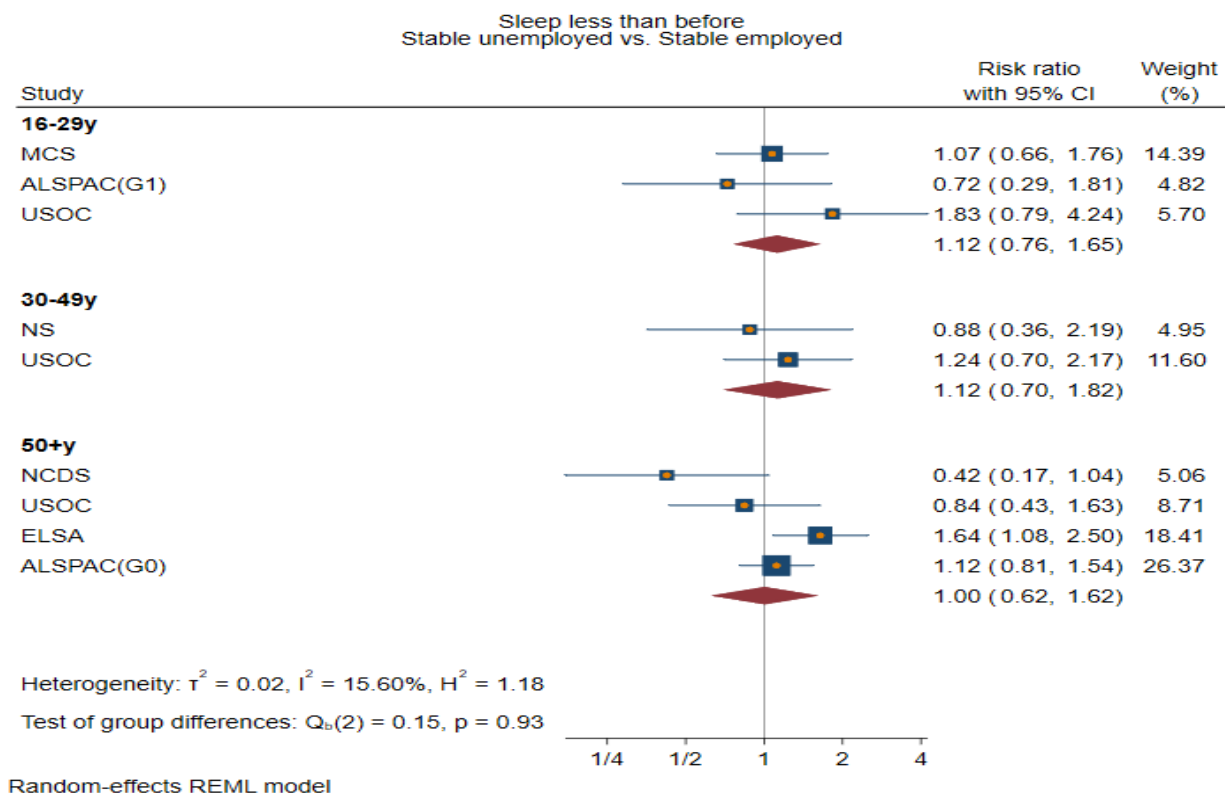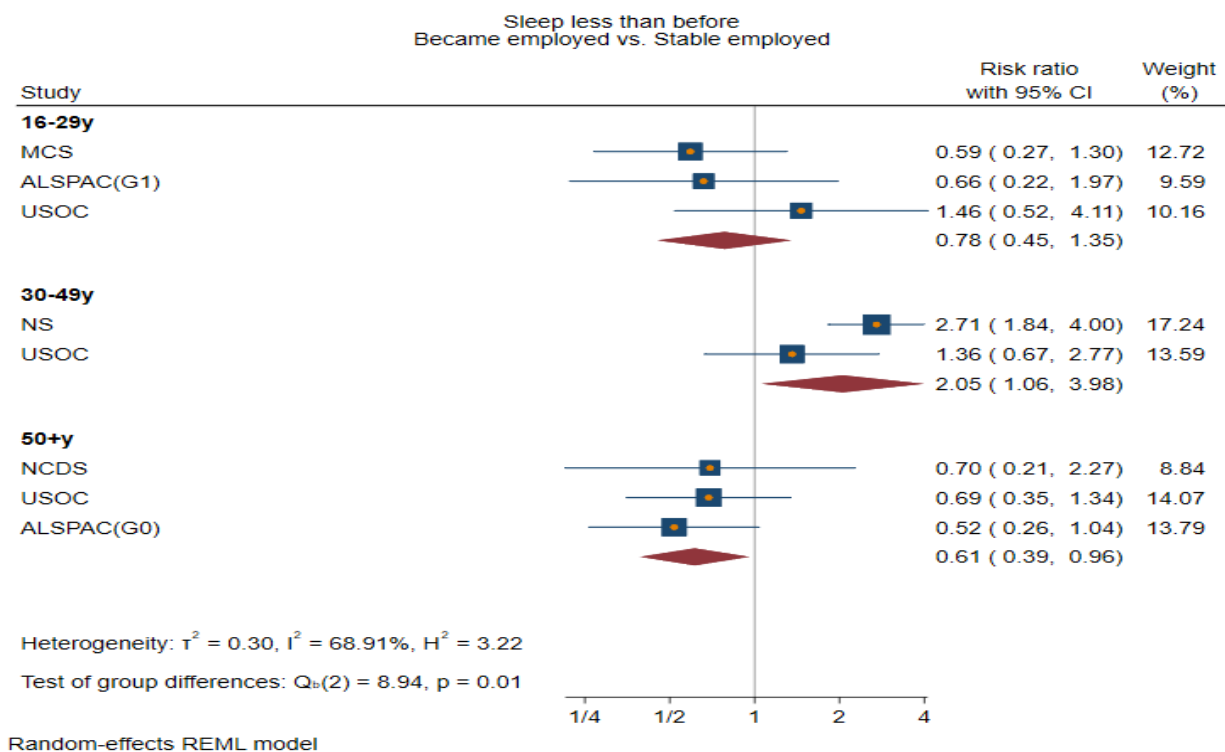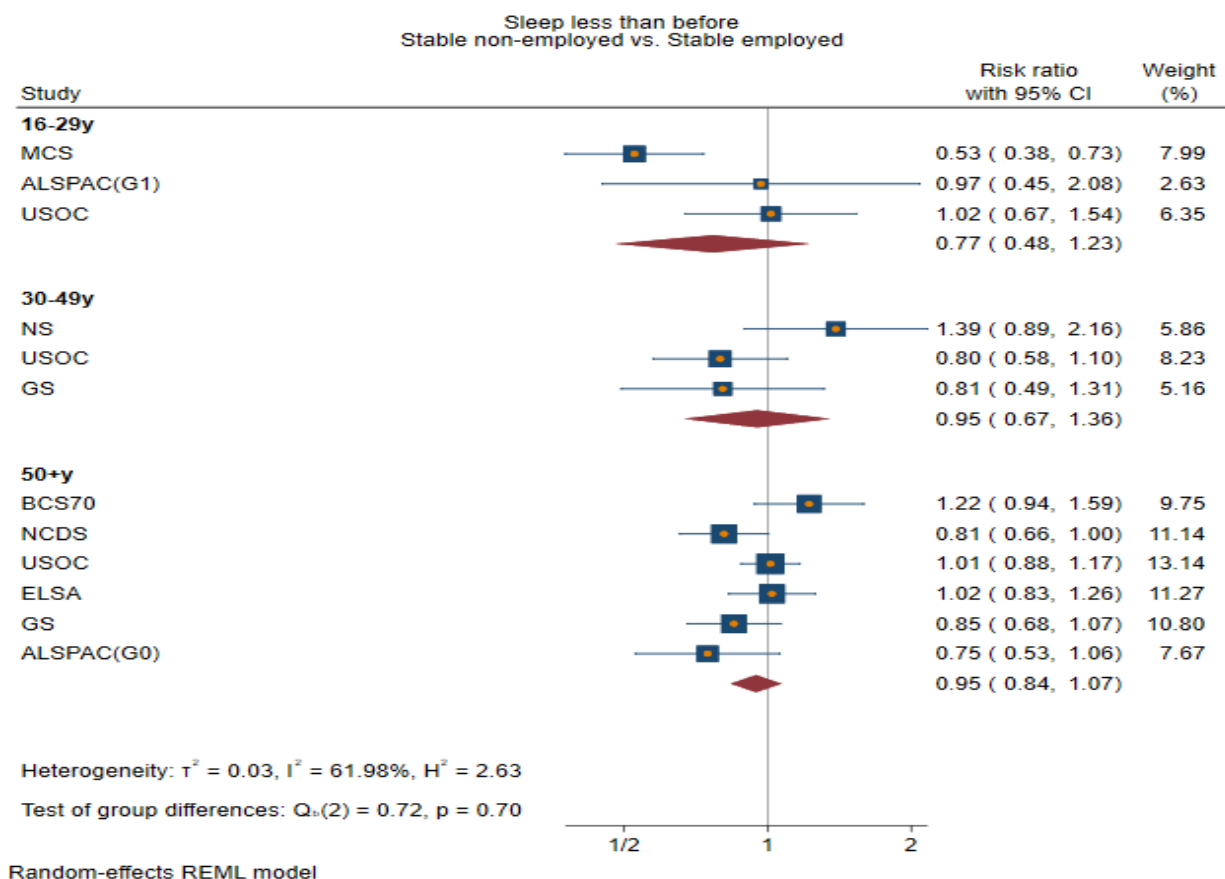

# Figure set 9: Sleeps less than before

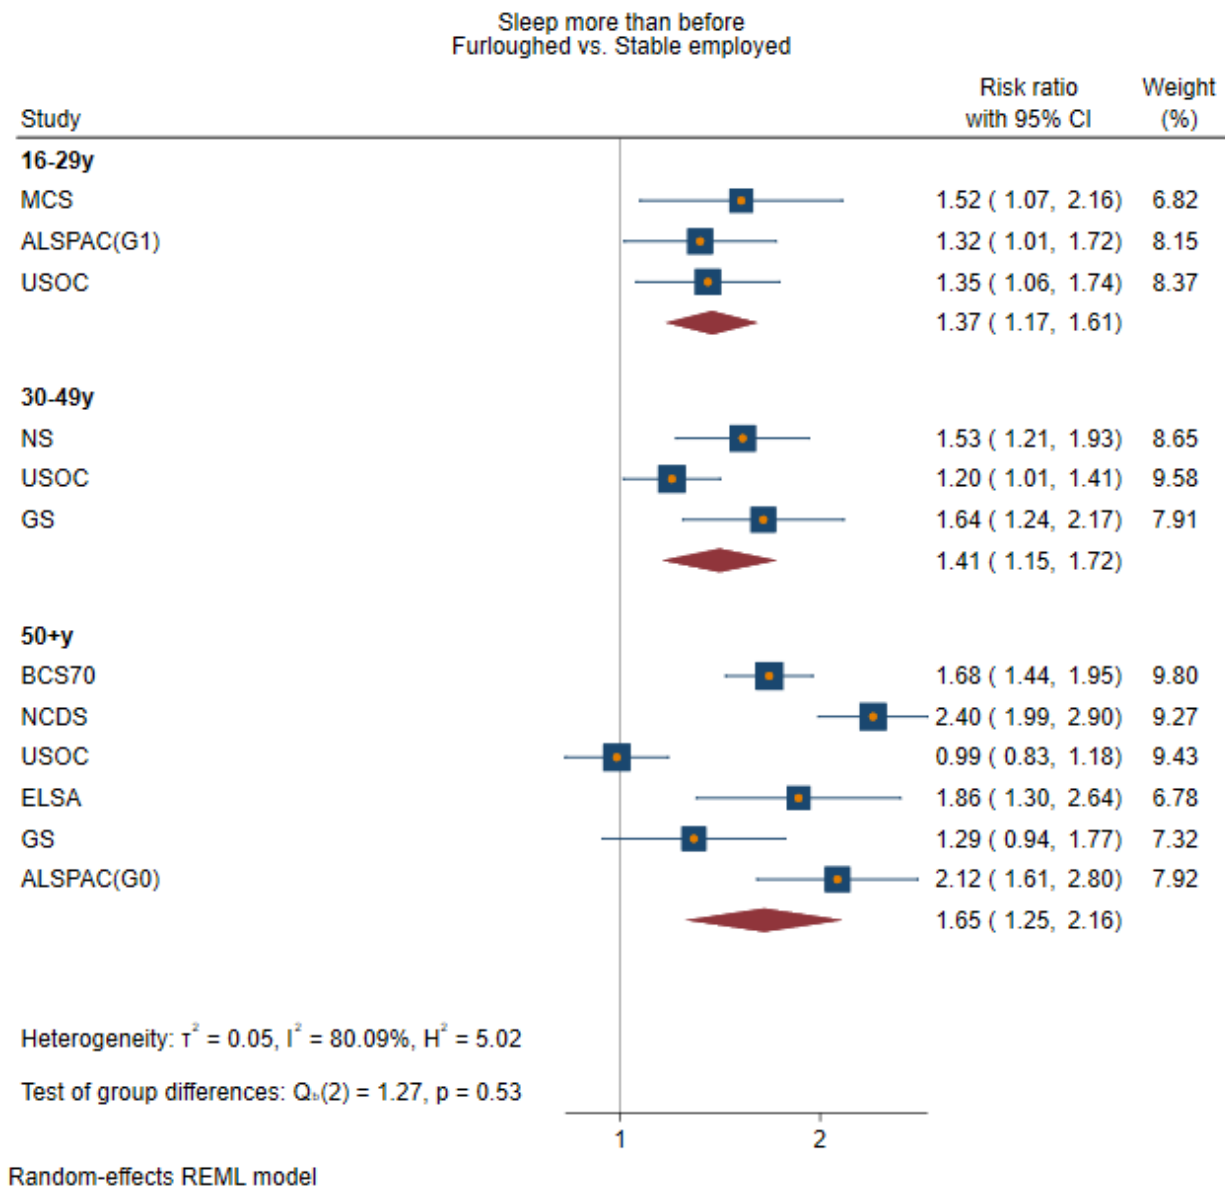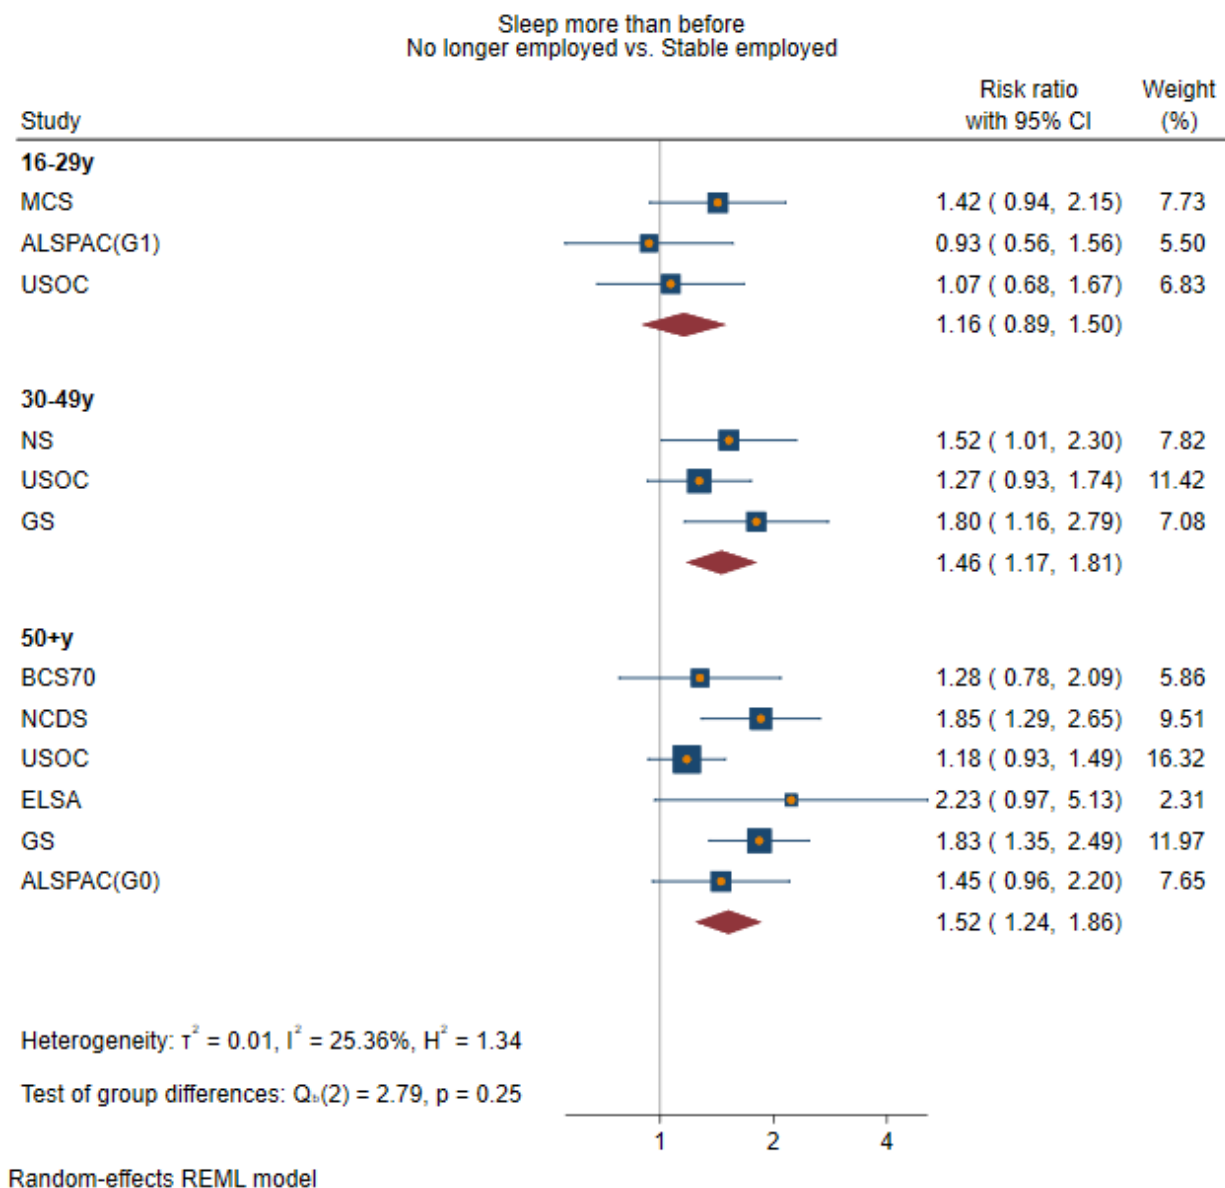

Sleep more than before  
Stable unemployed vs. Stable employed

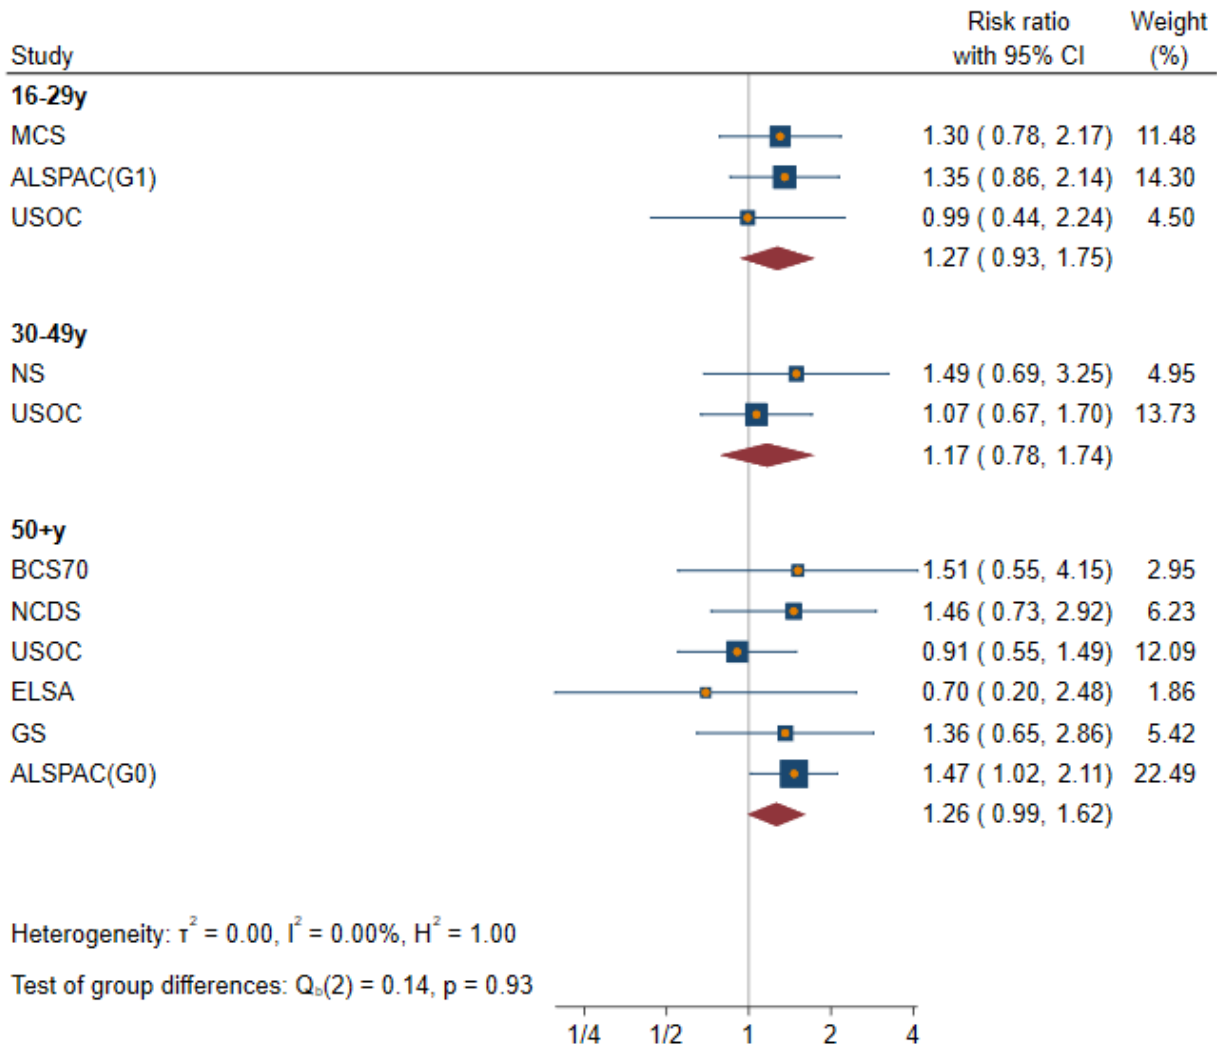

Random-effects REML model

Sleep more than before  
Became employed vs. Stable employed

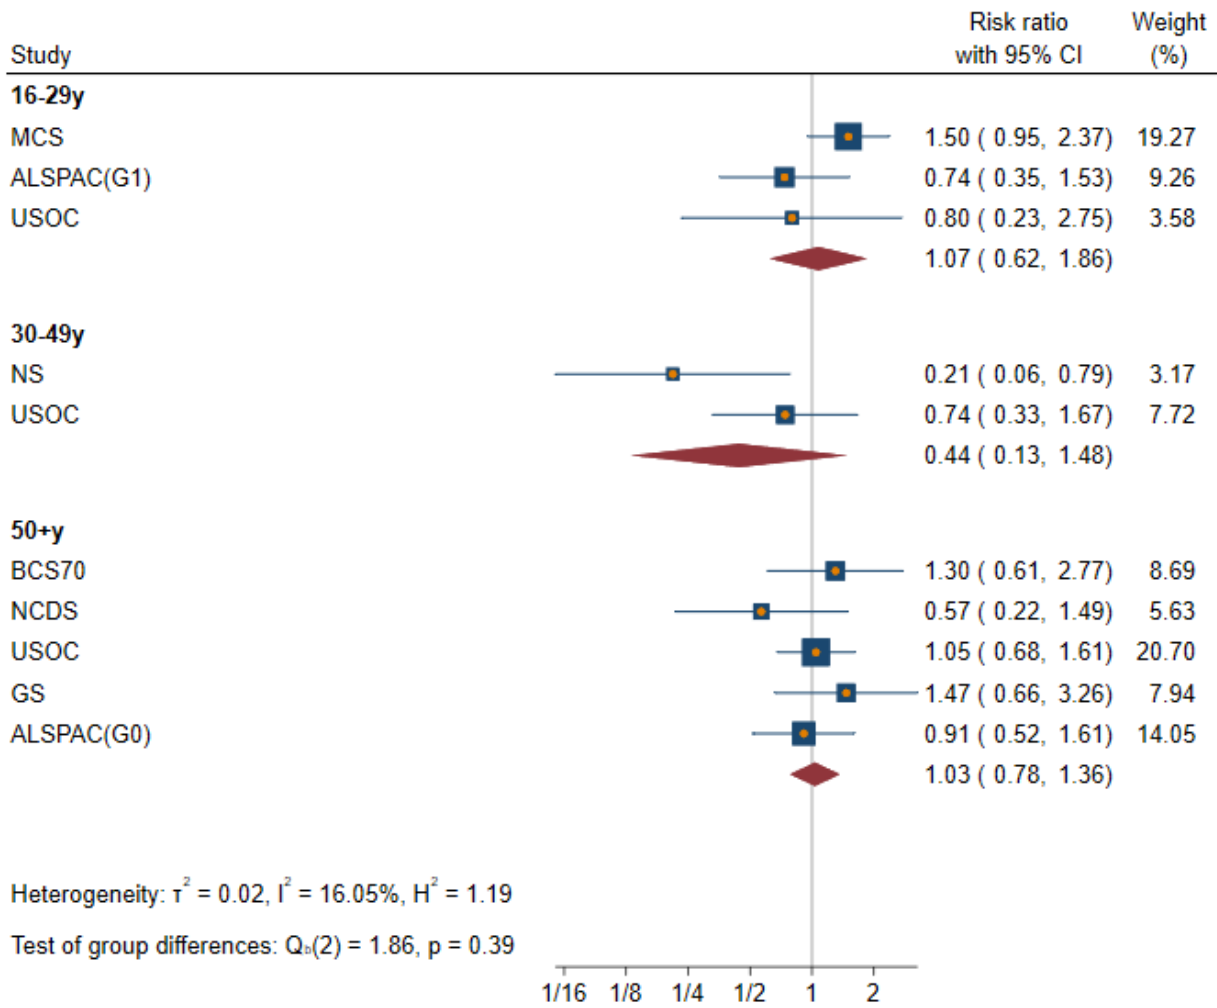

Random-effects REML model

Sleep more than before  
Stable non-employed vs. Stable employed

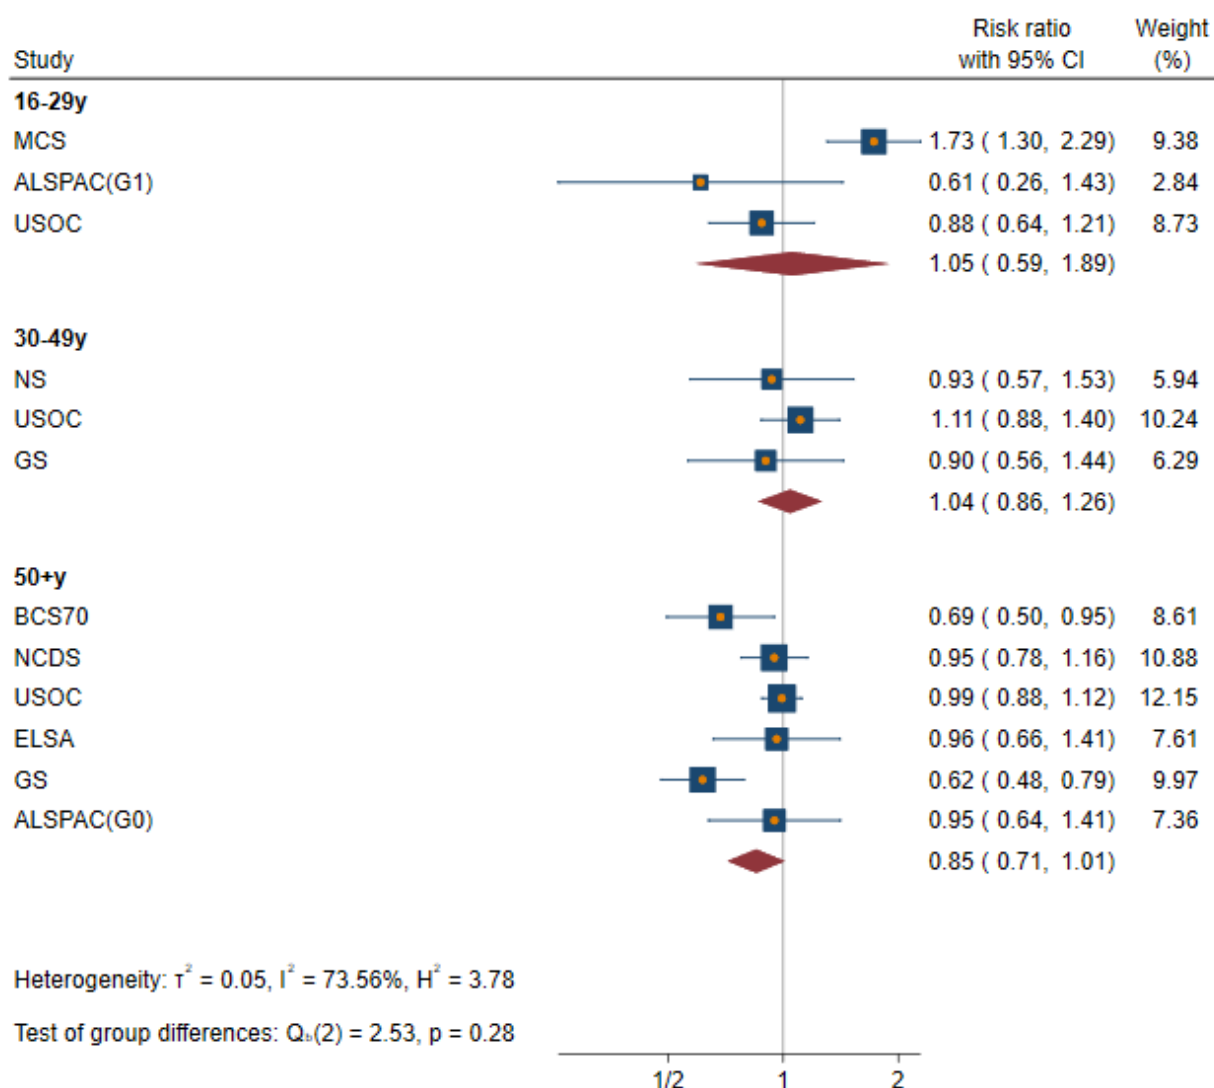

Random-effects REML model

Figure set 10: From 6/9h a night to outside ‘normal range’

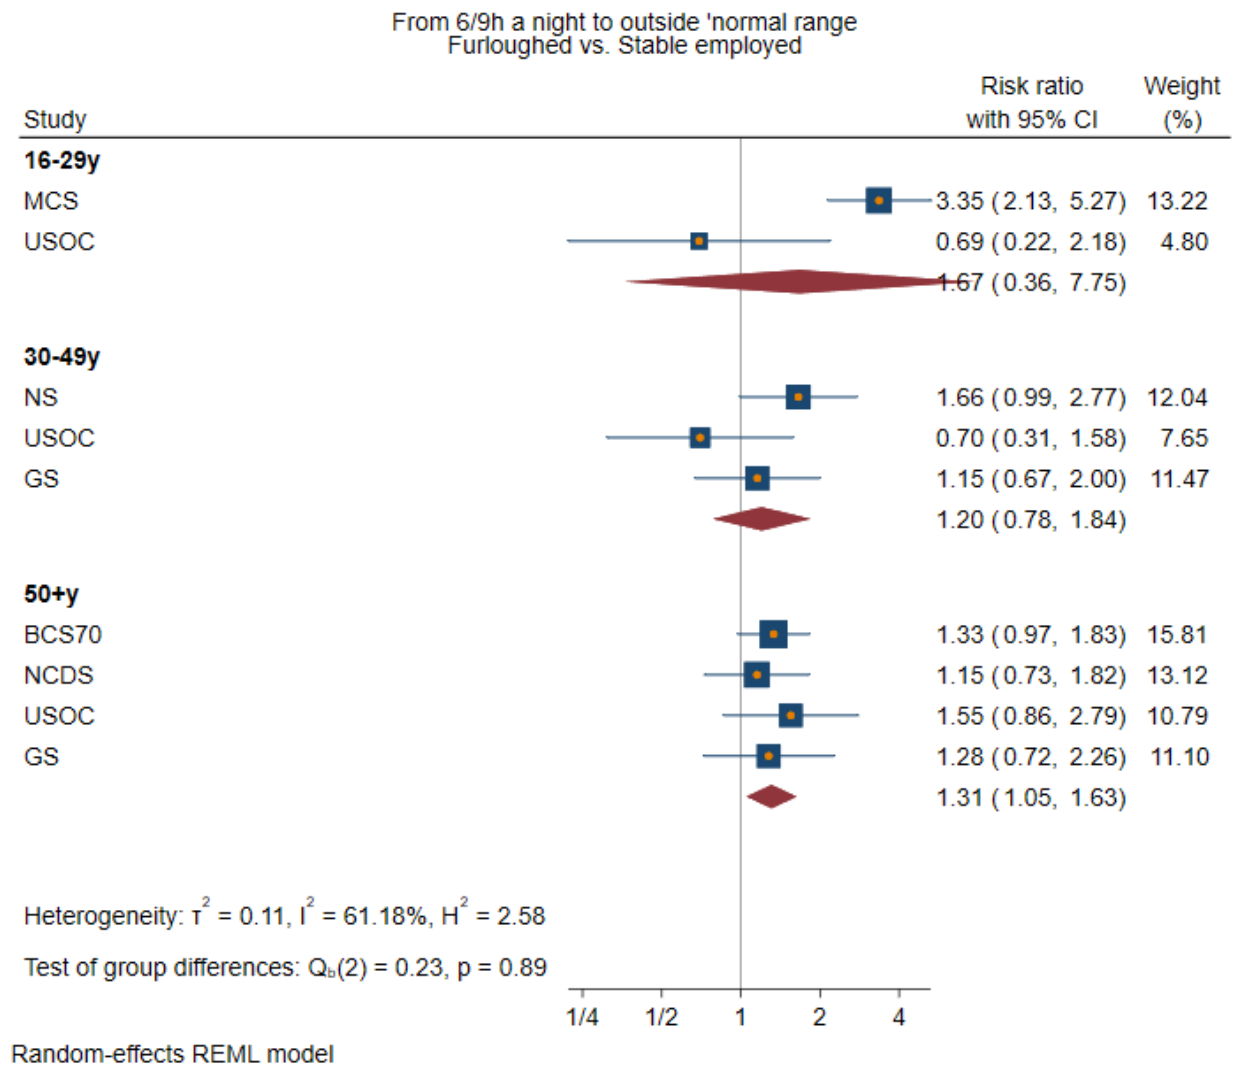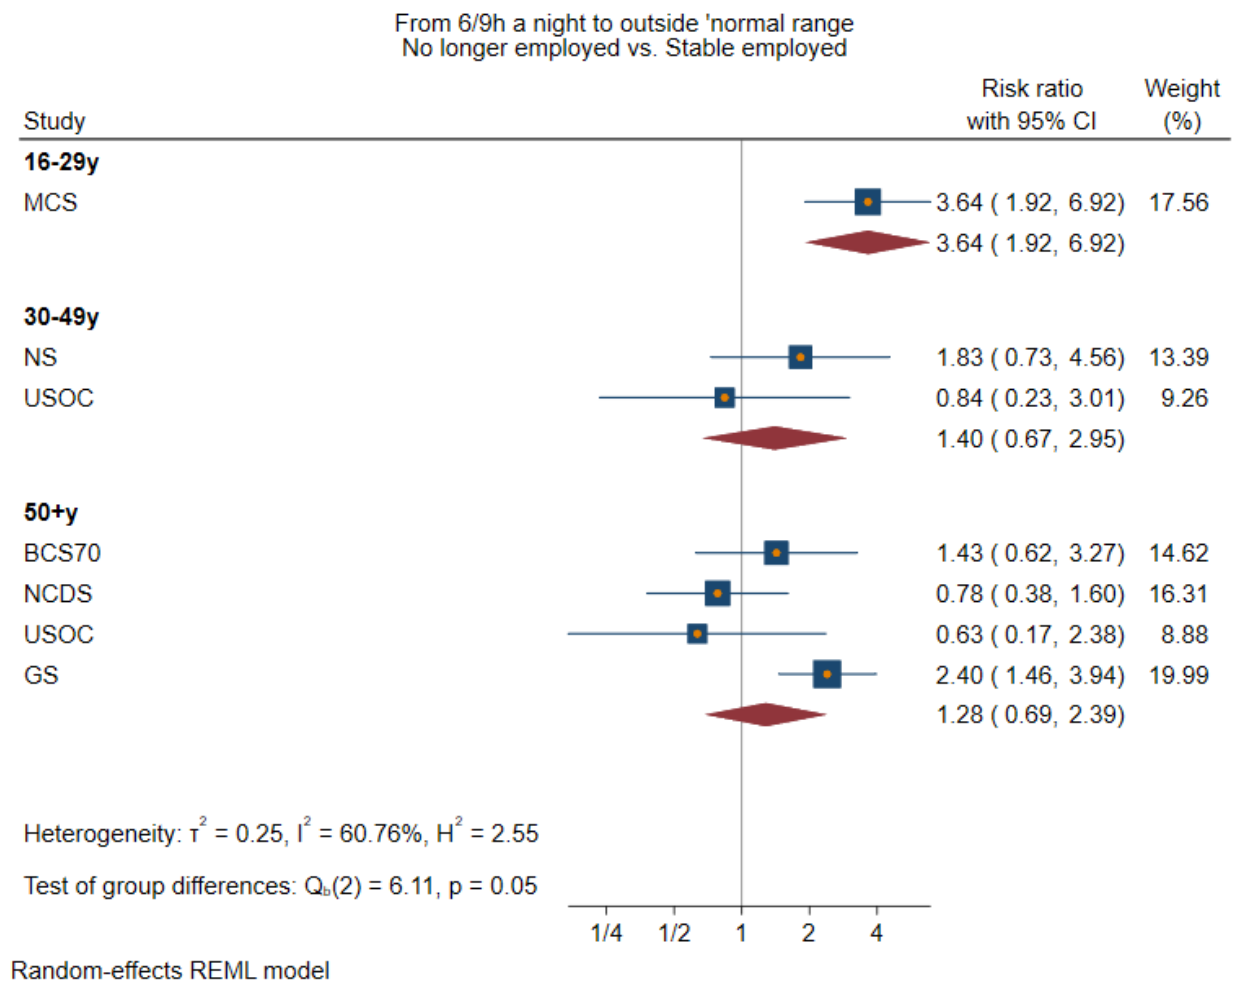

From 6/9h a night to outside 'normal range  
Stable unemployed vs. Stable employed

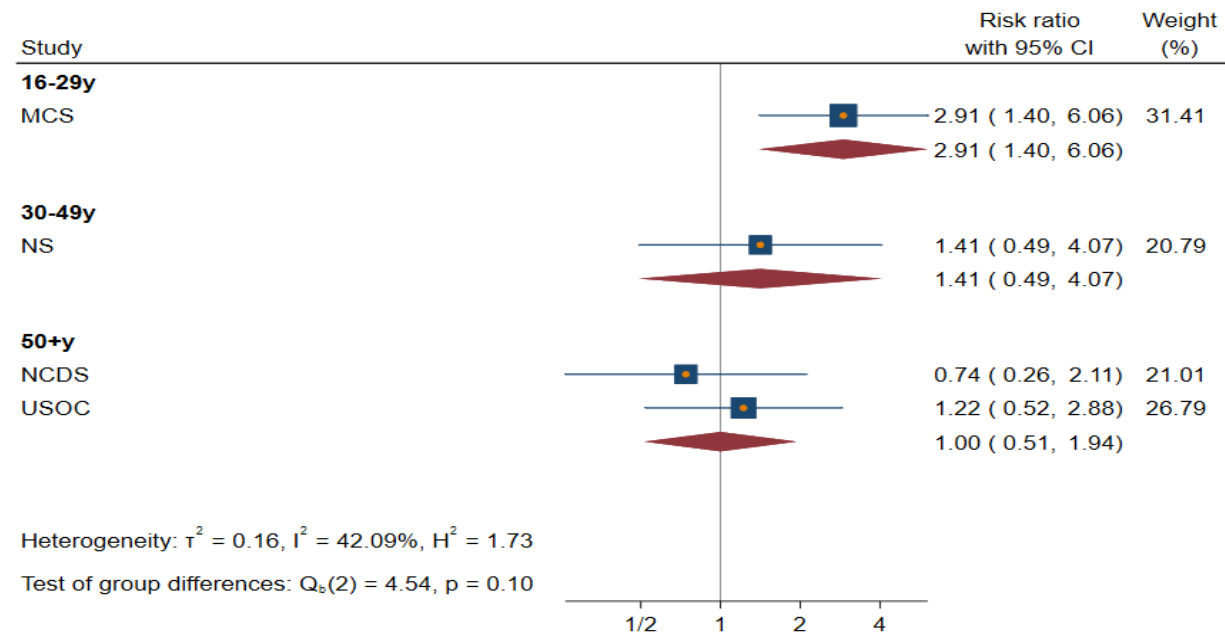

Random-effects REML model

From 6/9h a night to outside 'normal range  
Became employed vs. Stable employed

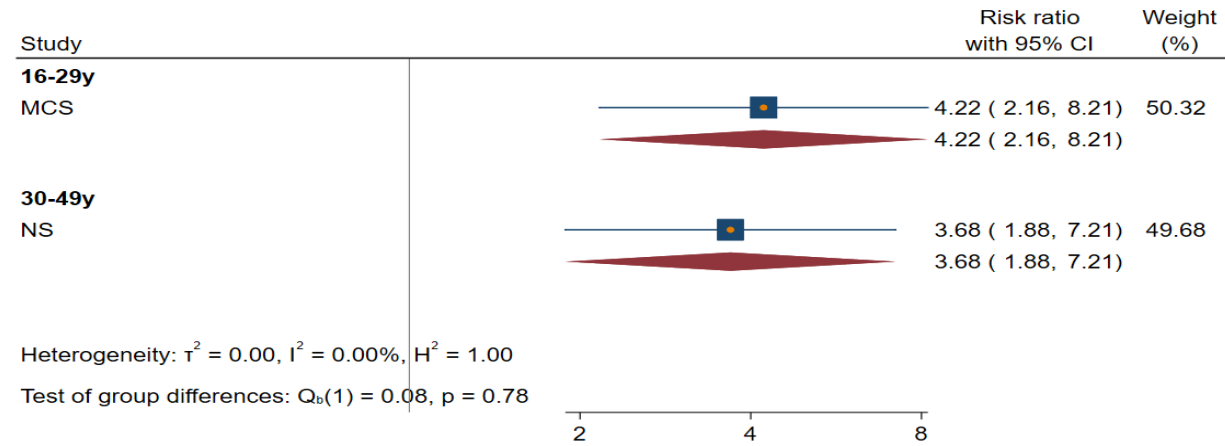

Random-effects REML model

From 6/9h a night to outside 'normal range  
Stable non-employed vs. Stable employed

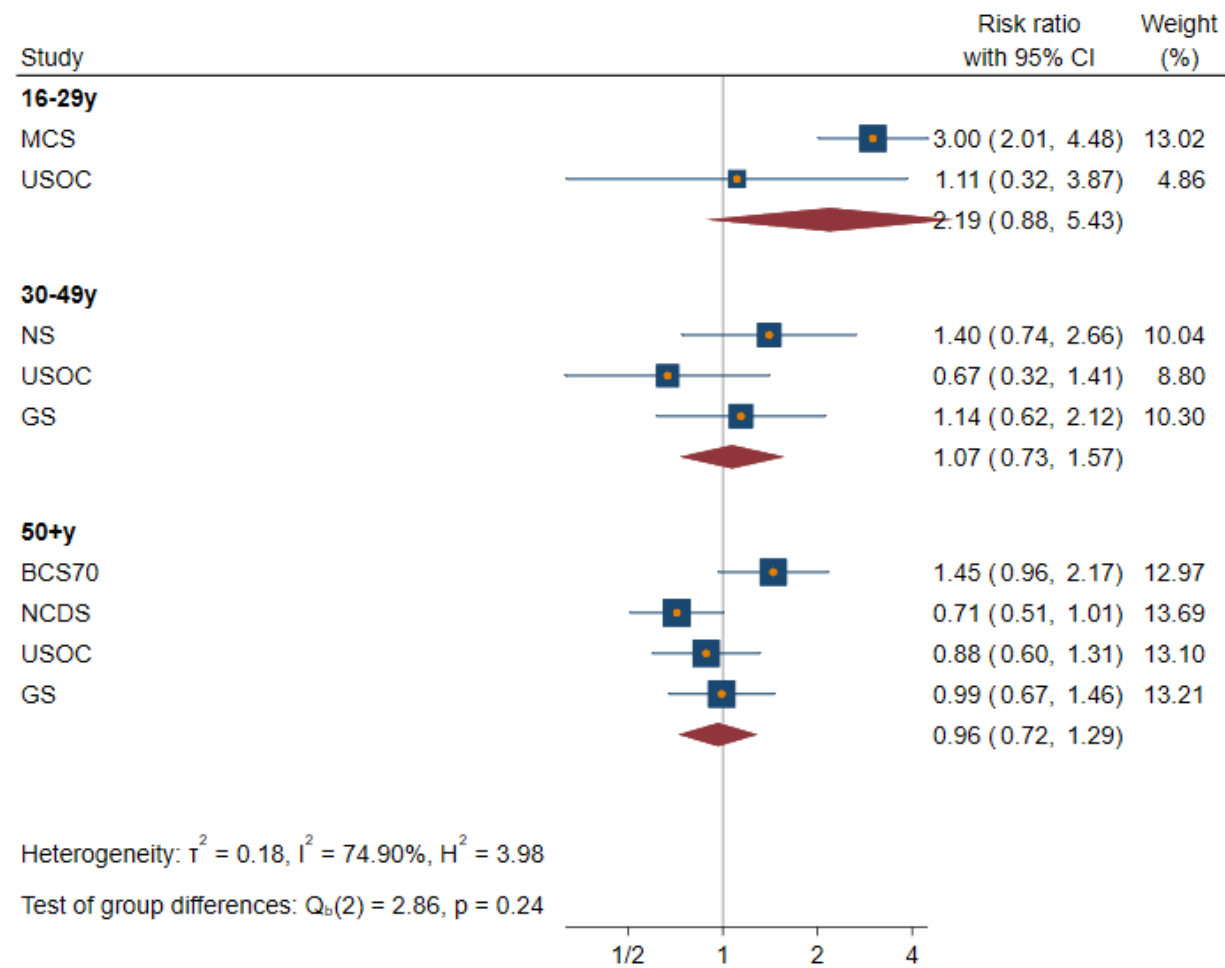

Random-effects REML model

Figure set 11: From outside ‘normal range’ to 6/9h a night

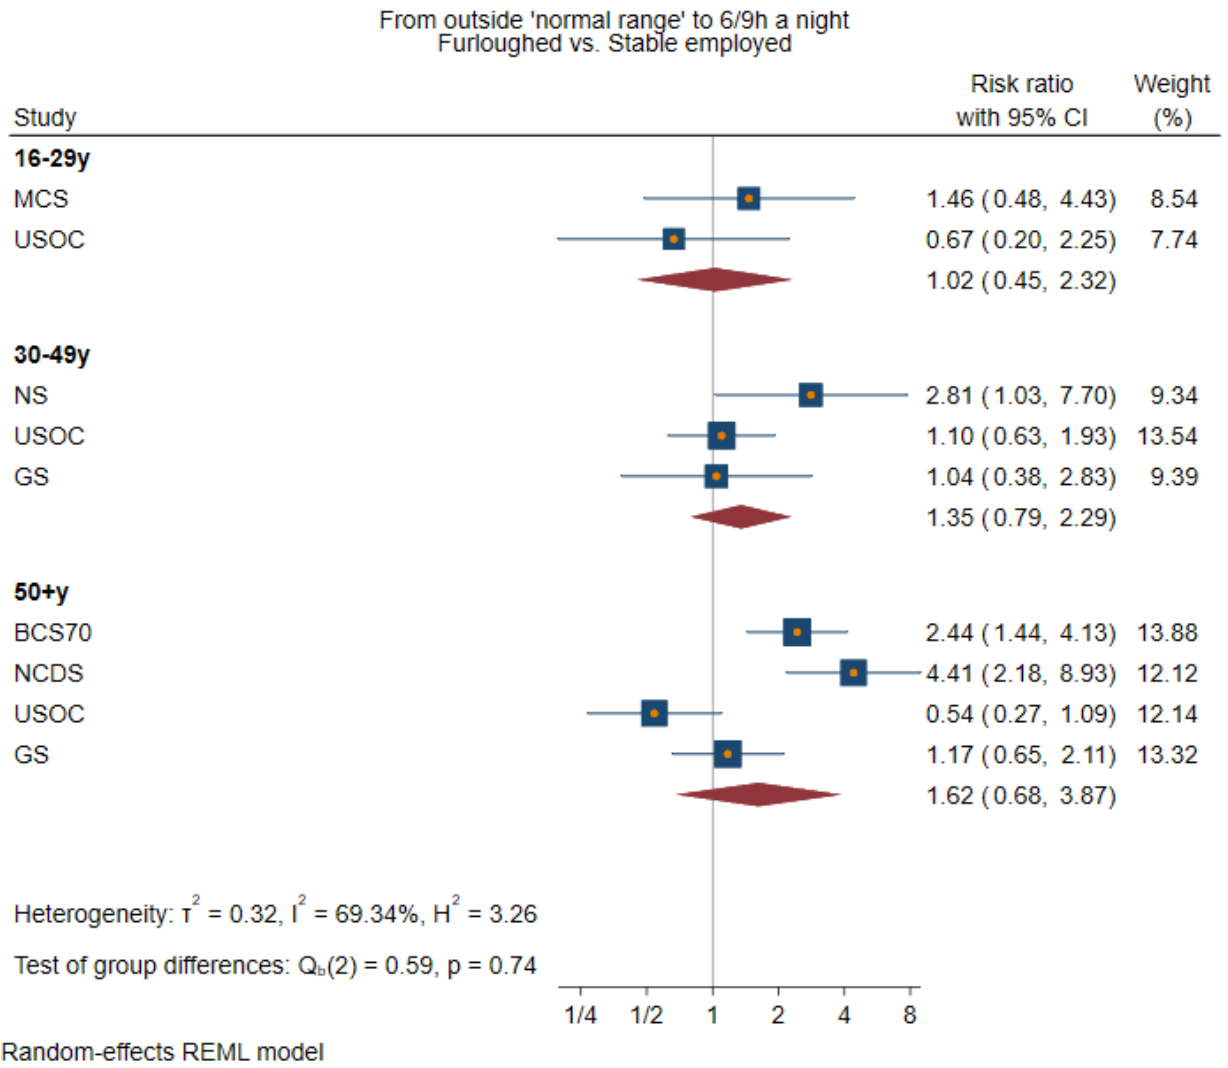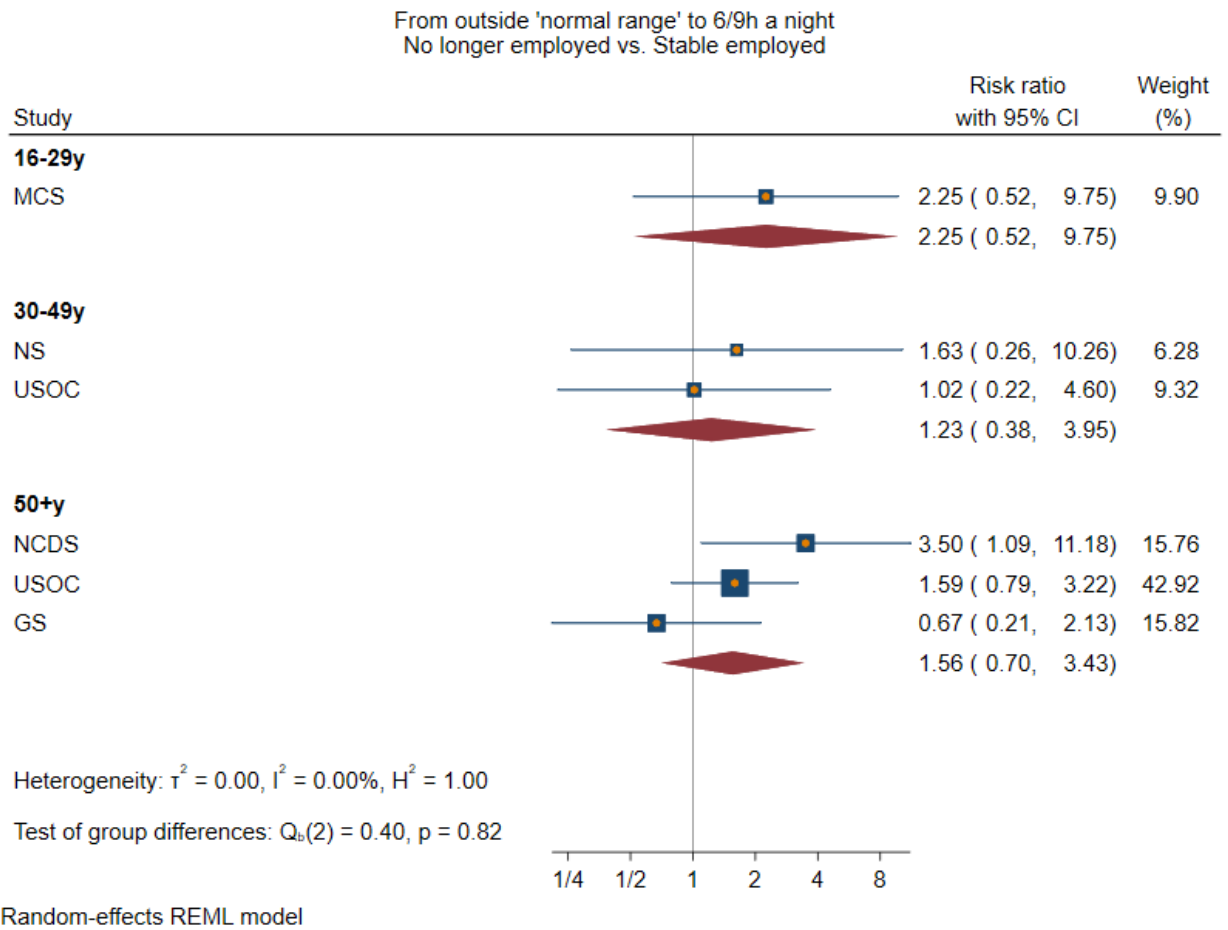



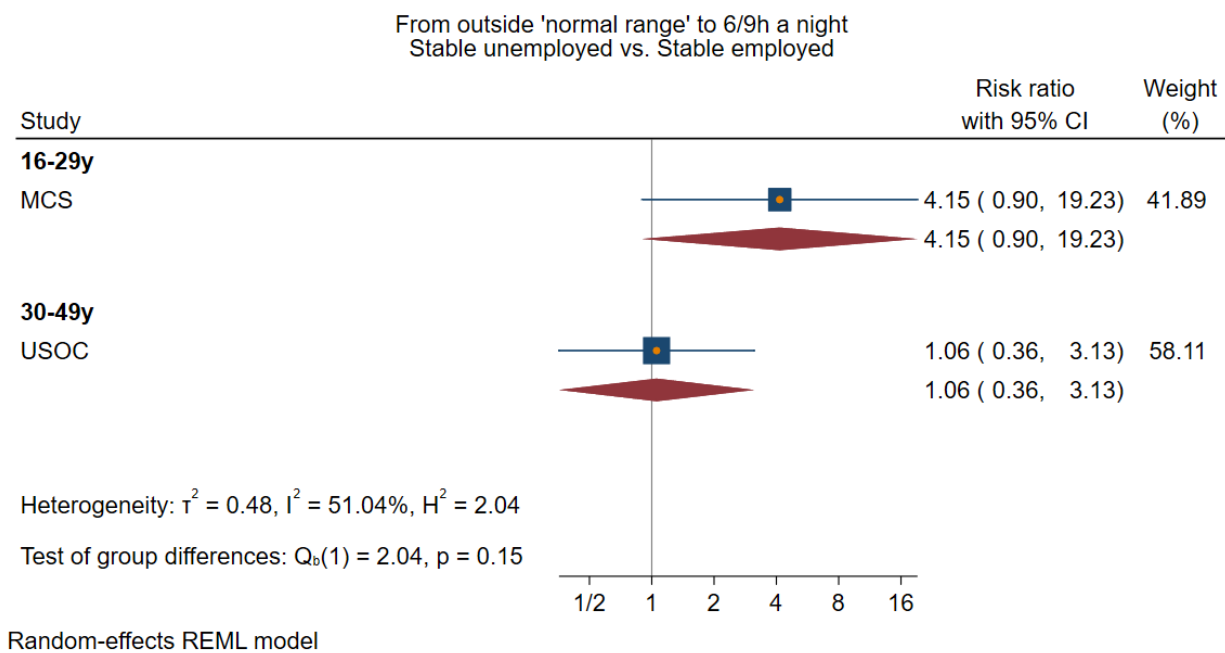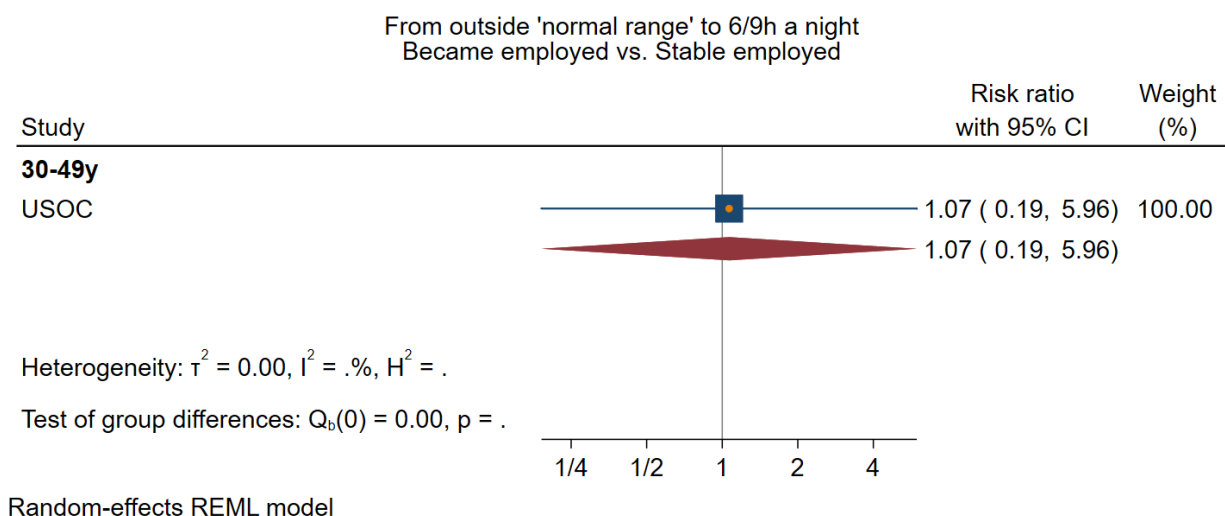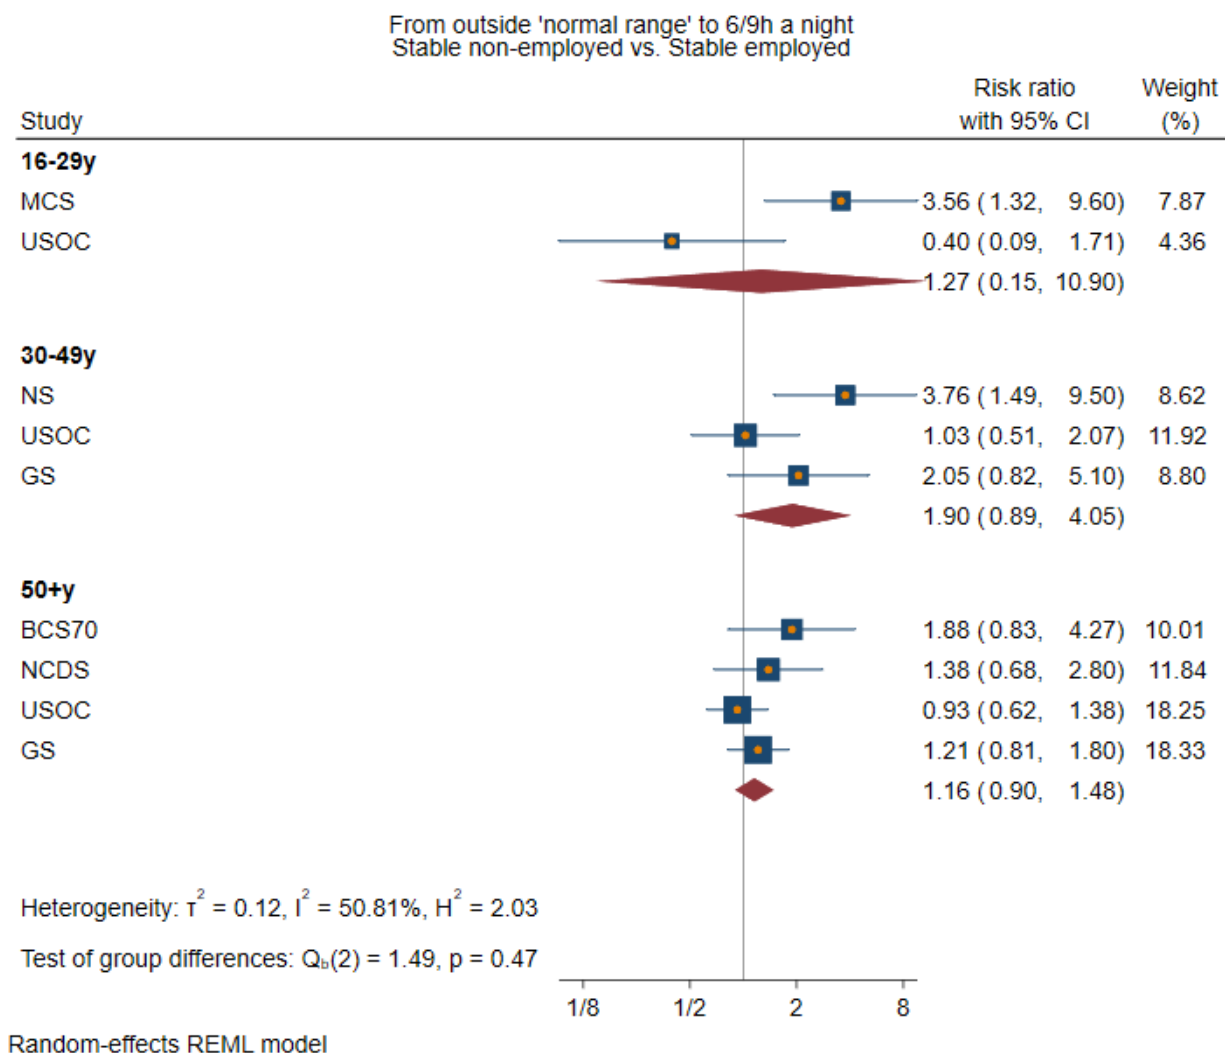

Figure set 12: Currently eats 2 or fewer fruit and veg

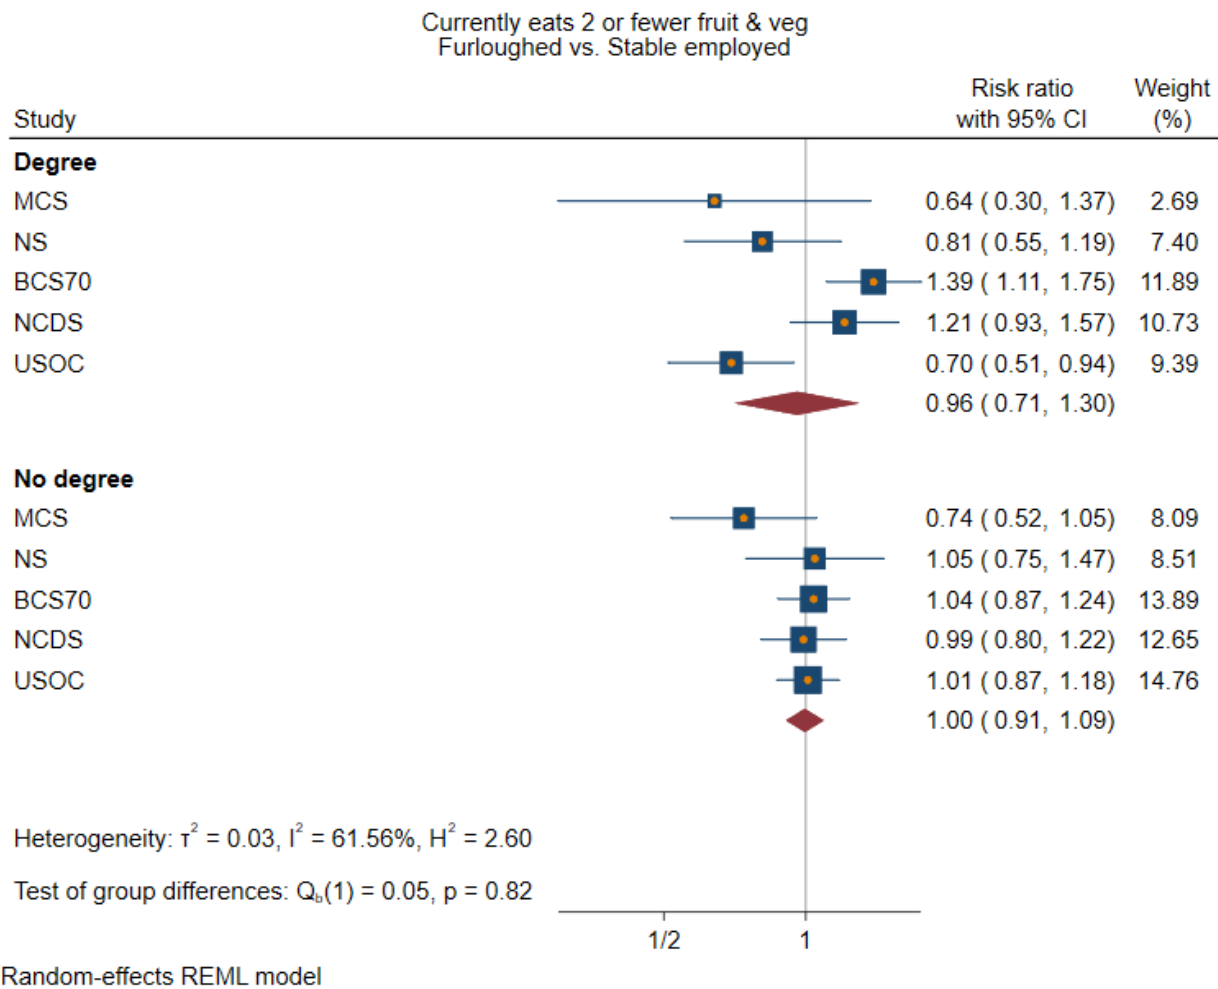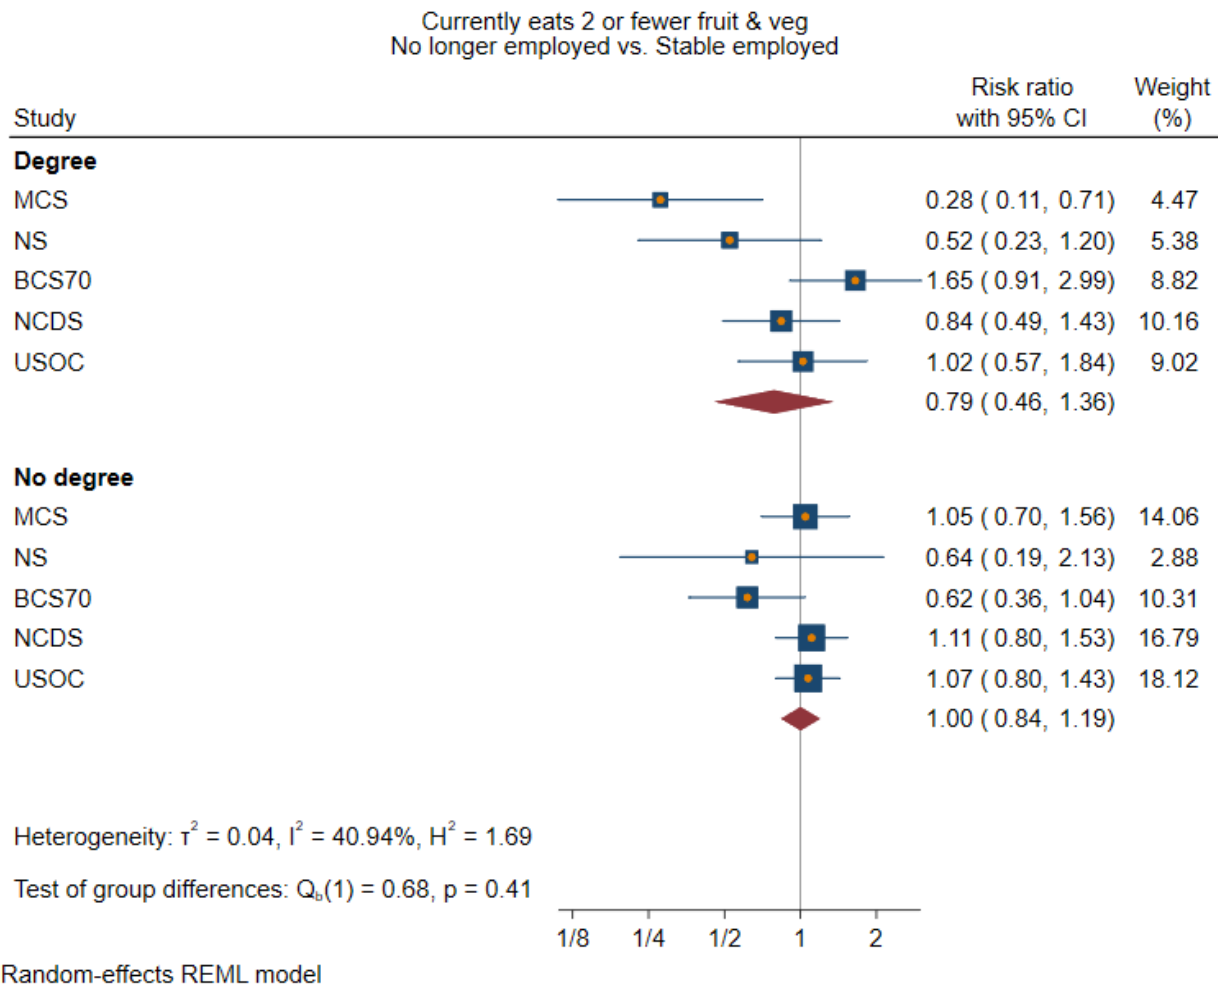

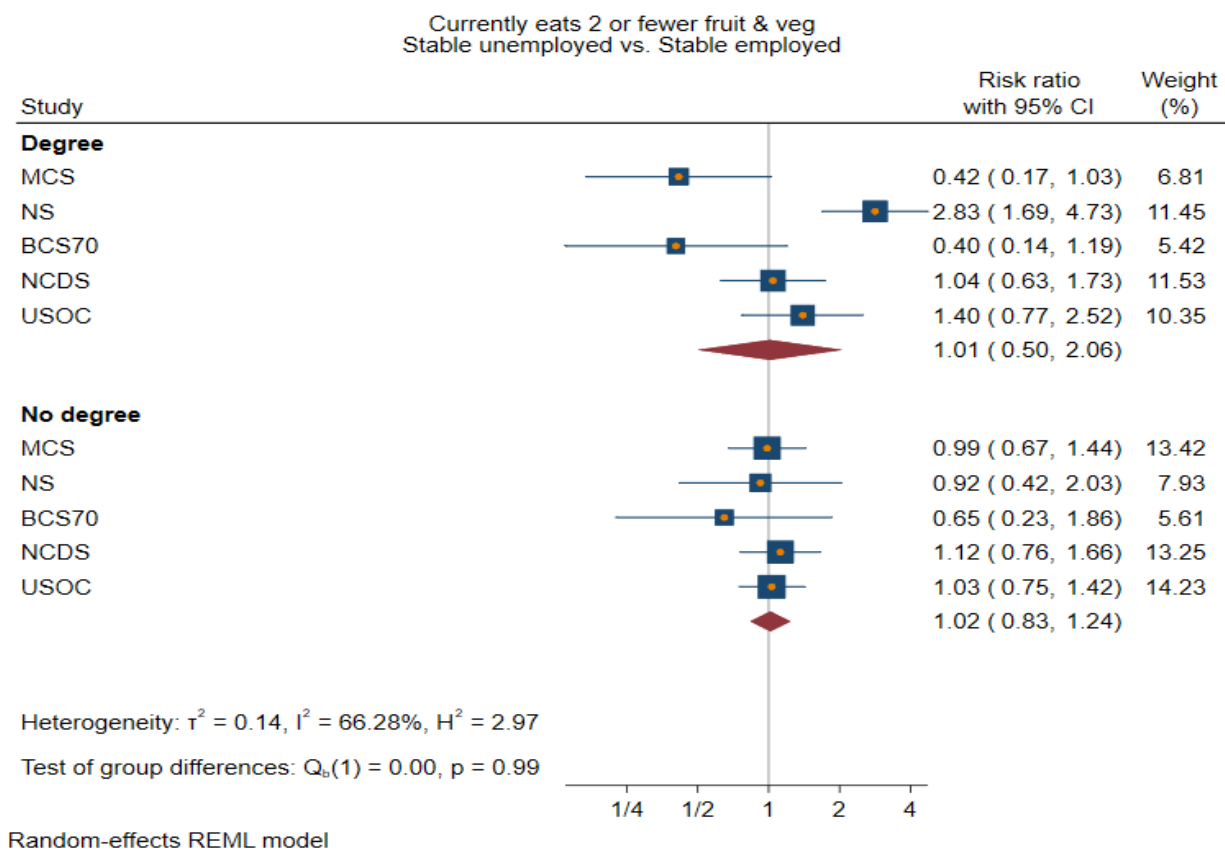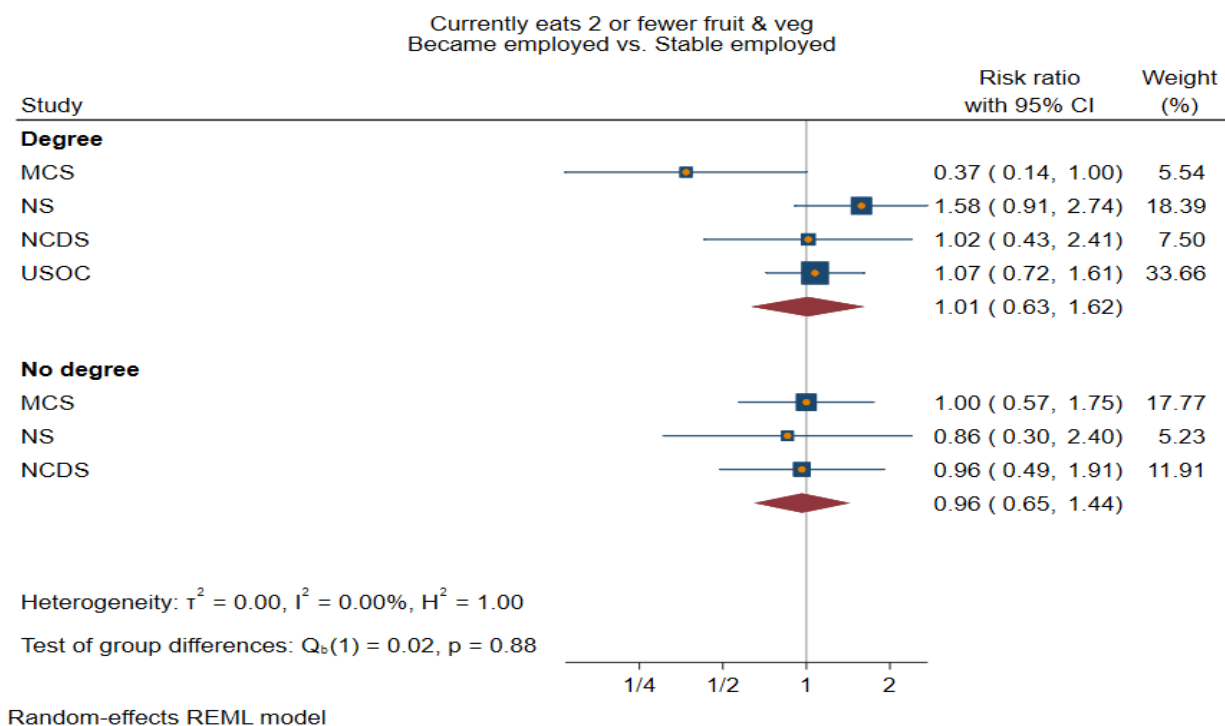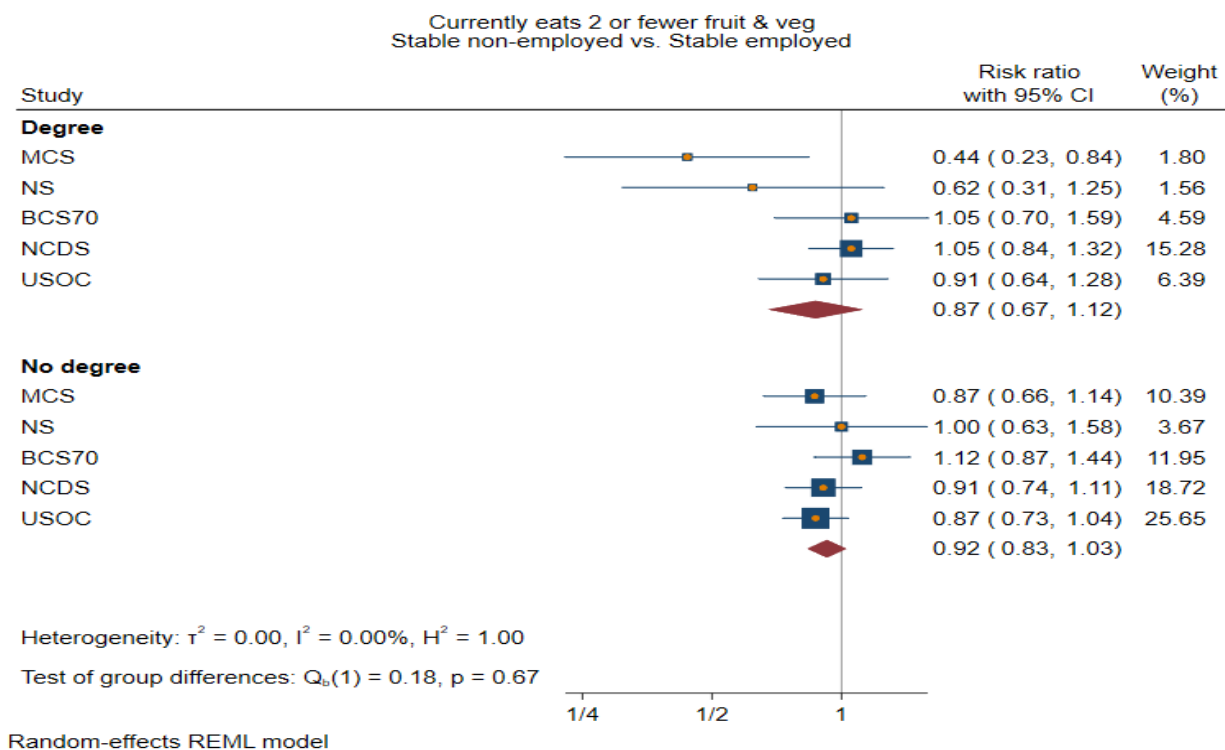

Figure set 13: Fewer fruit and veg

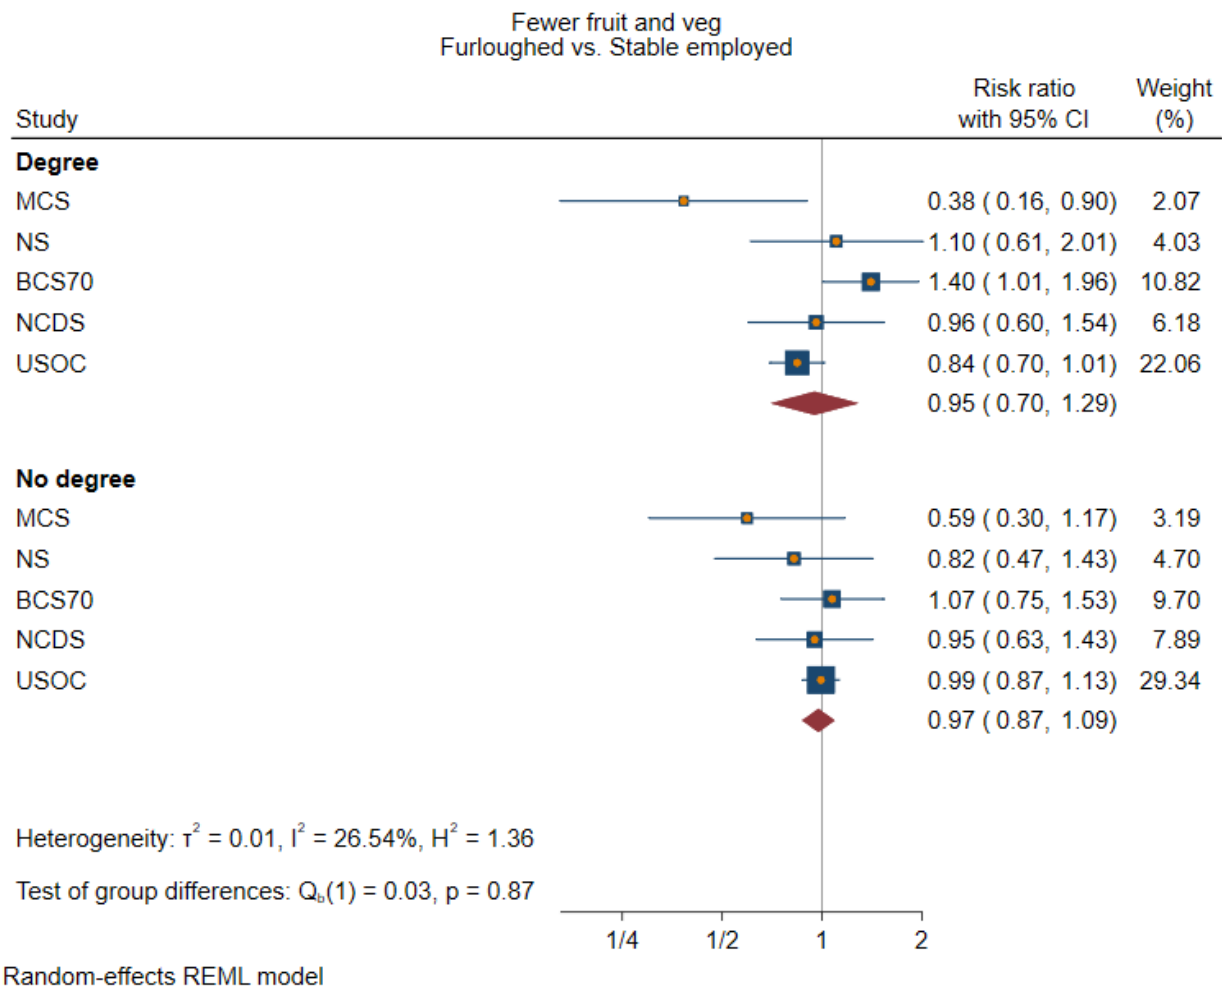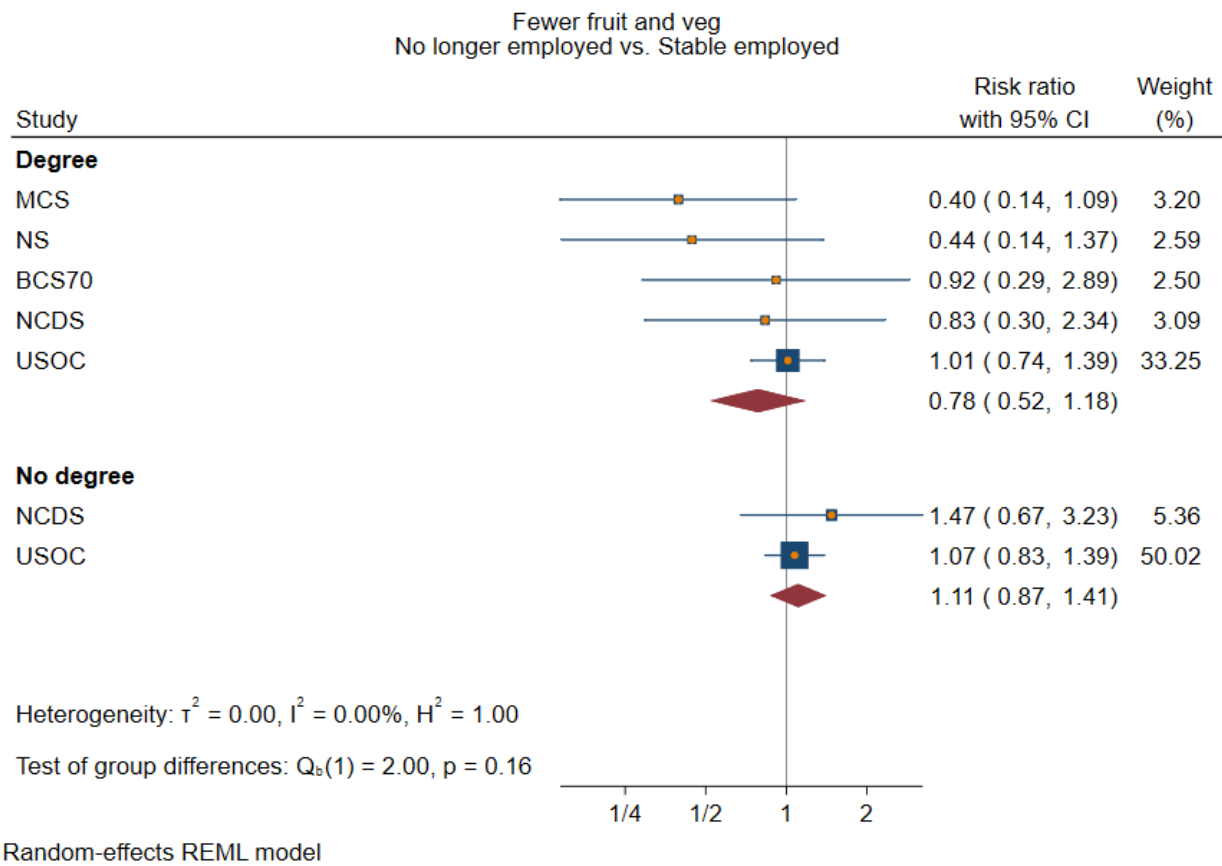

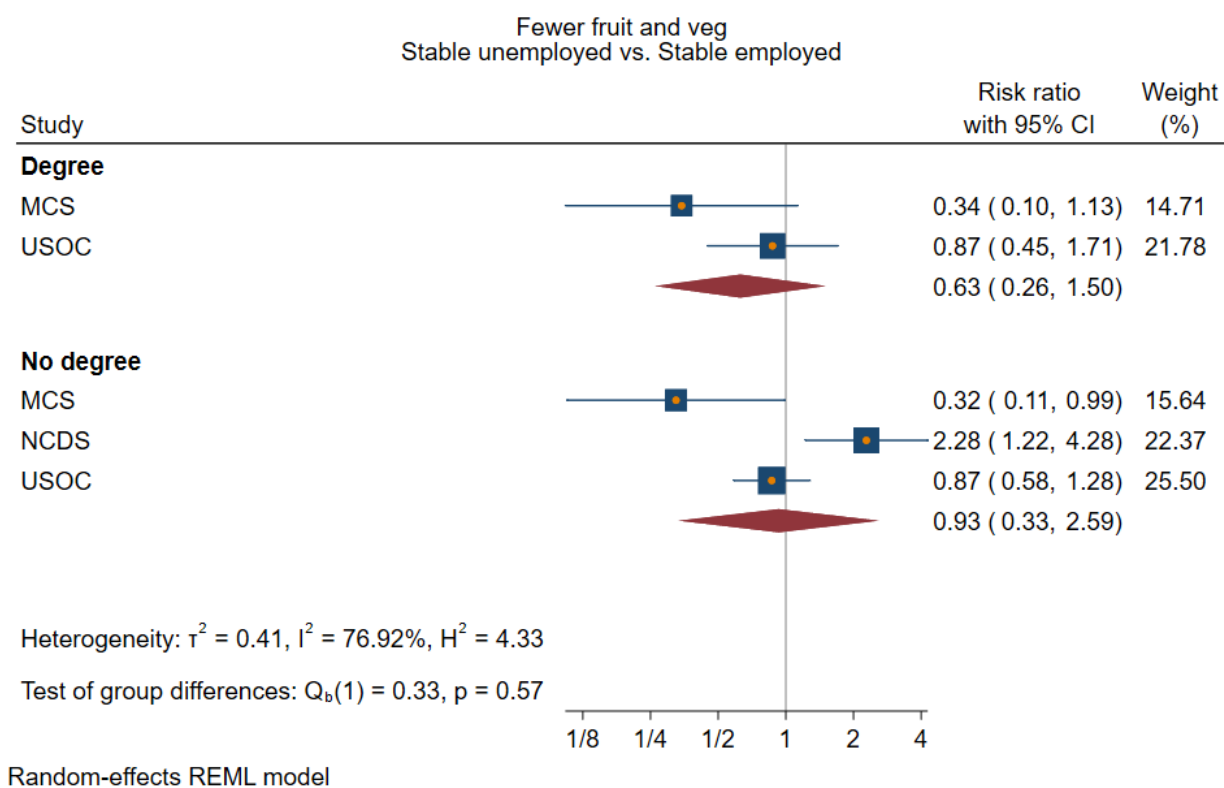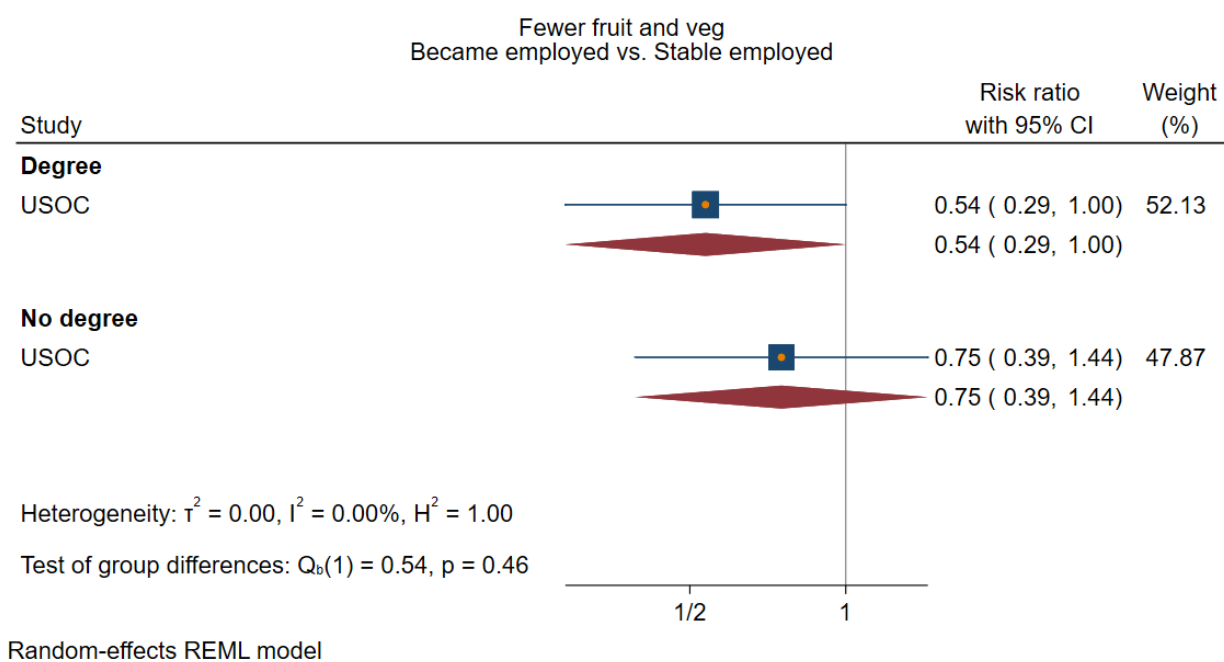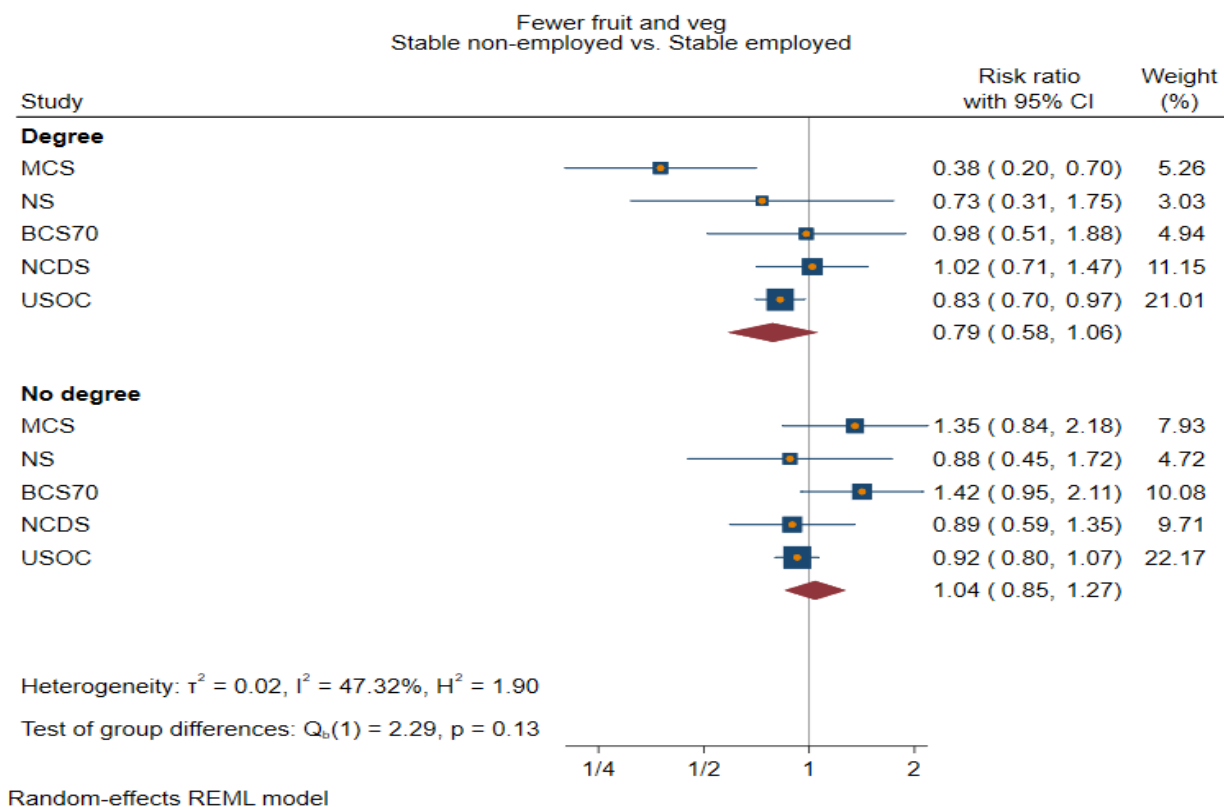

Figure set 14: More fruit and veg

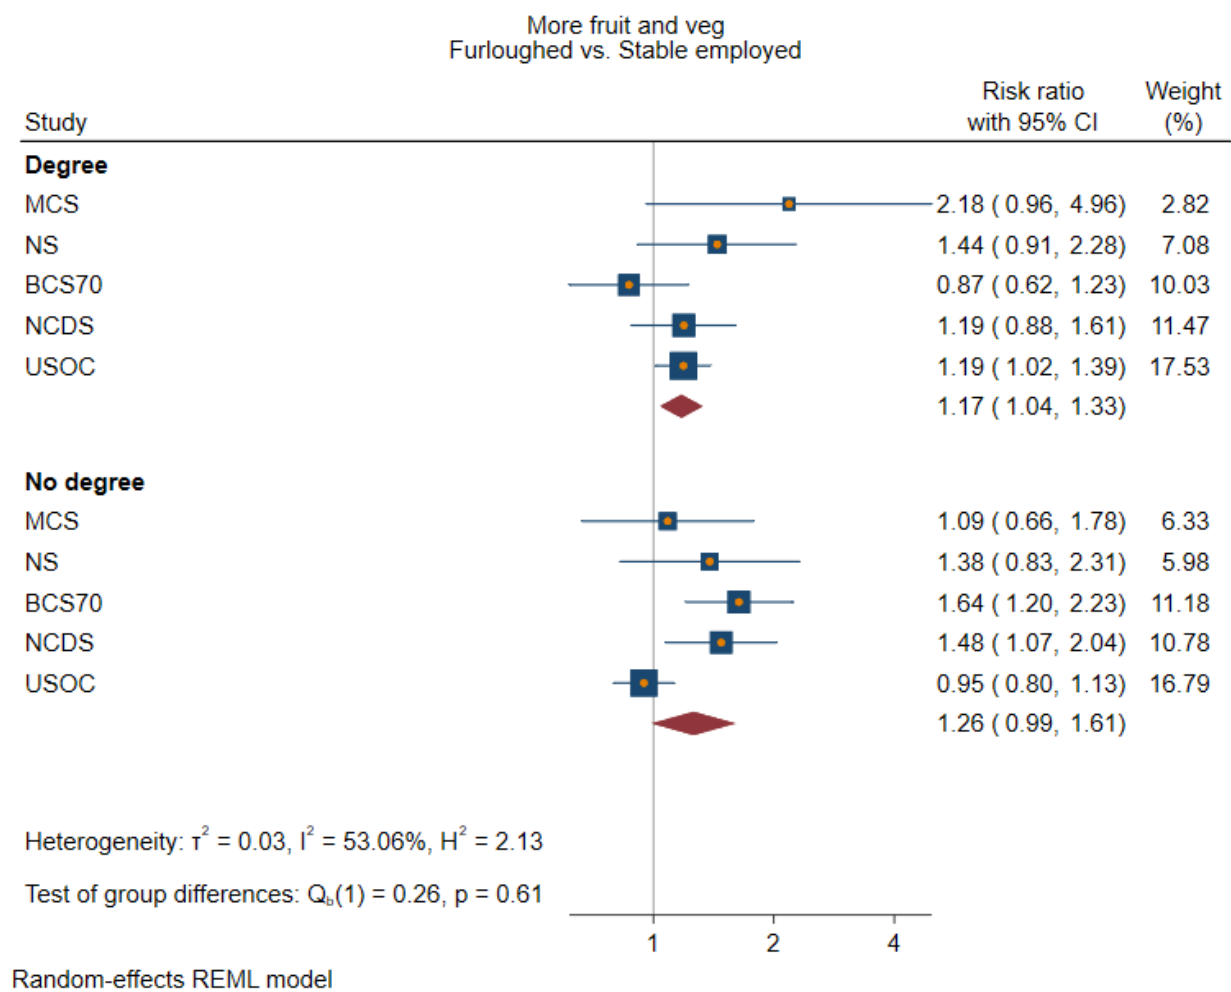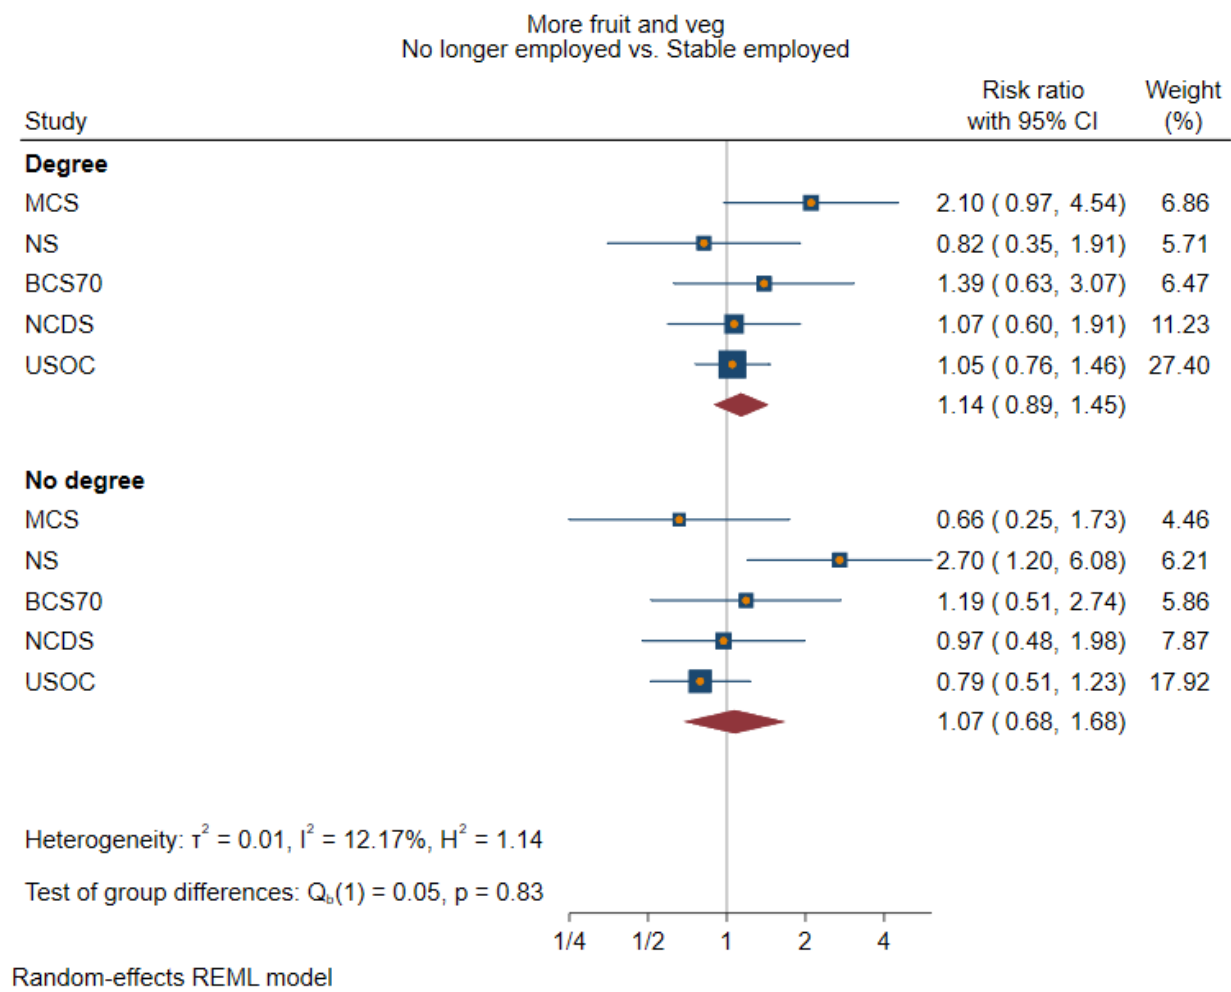

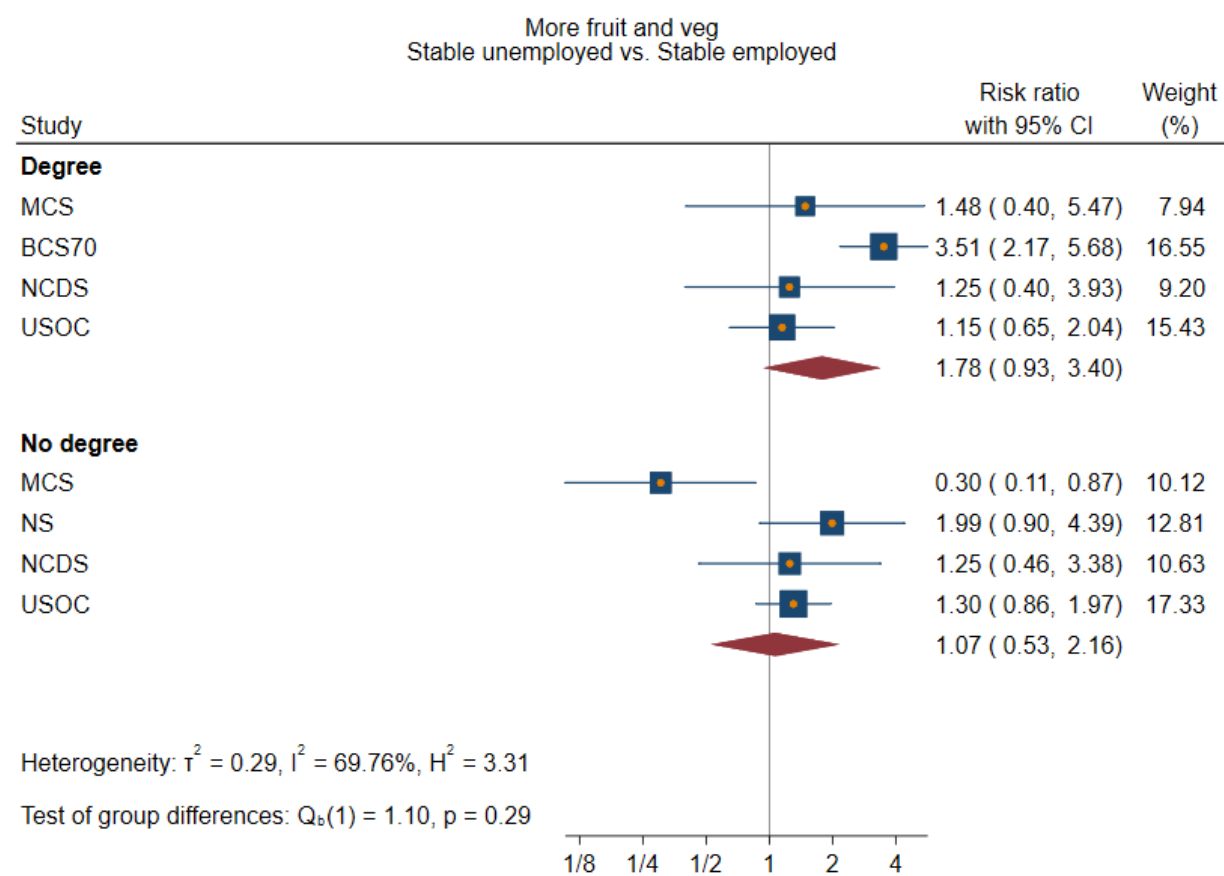

Random-effects REML model

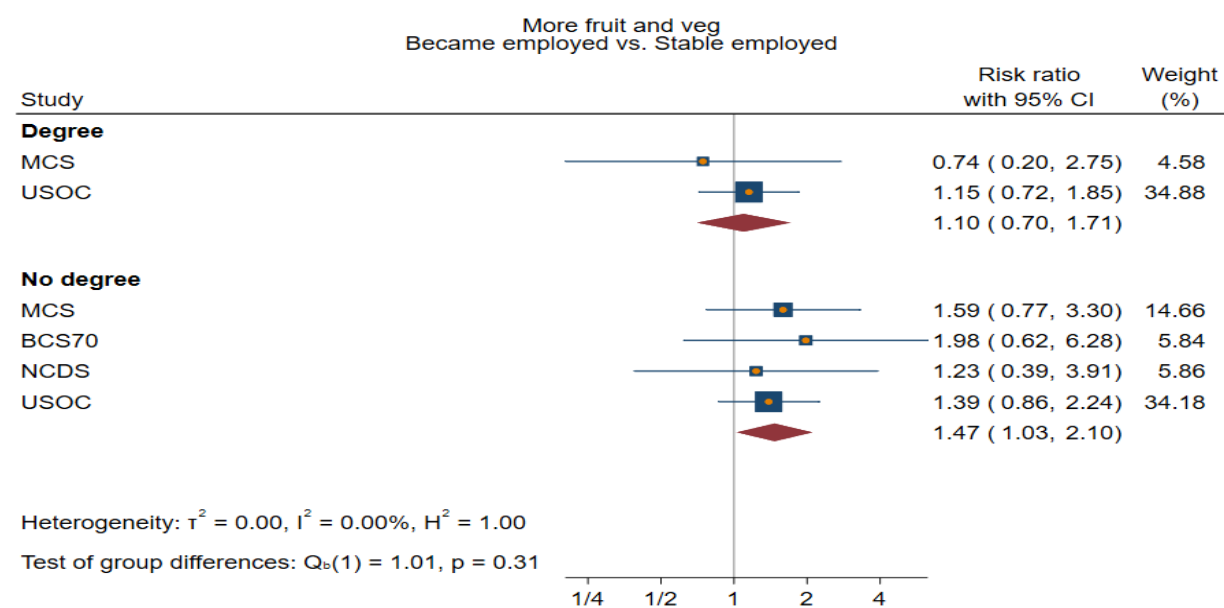

Random-effects REML model

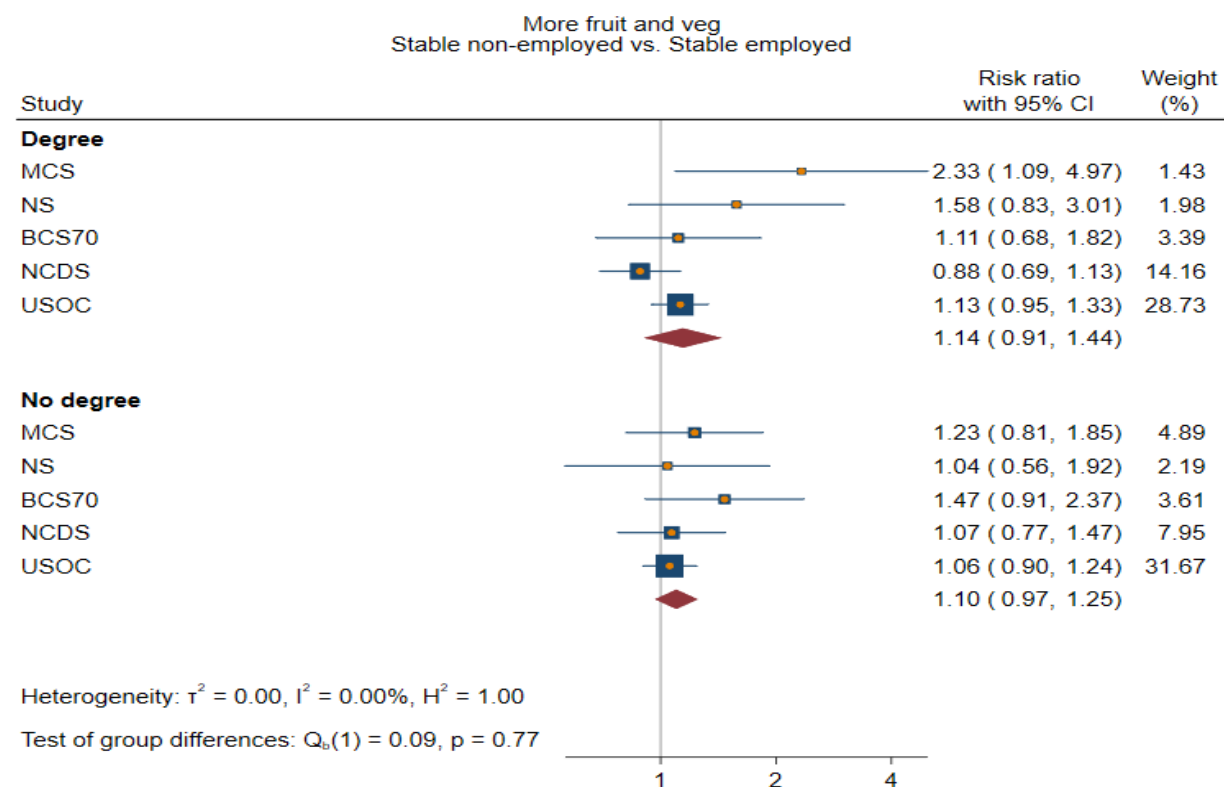

Random-effects REML model

Figure set 15: Less than 3 days a week of at least 30min exercise

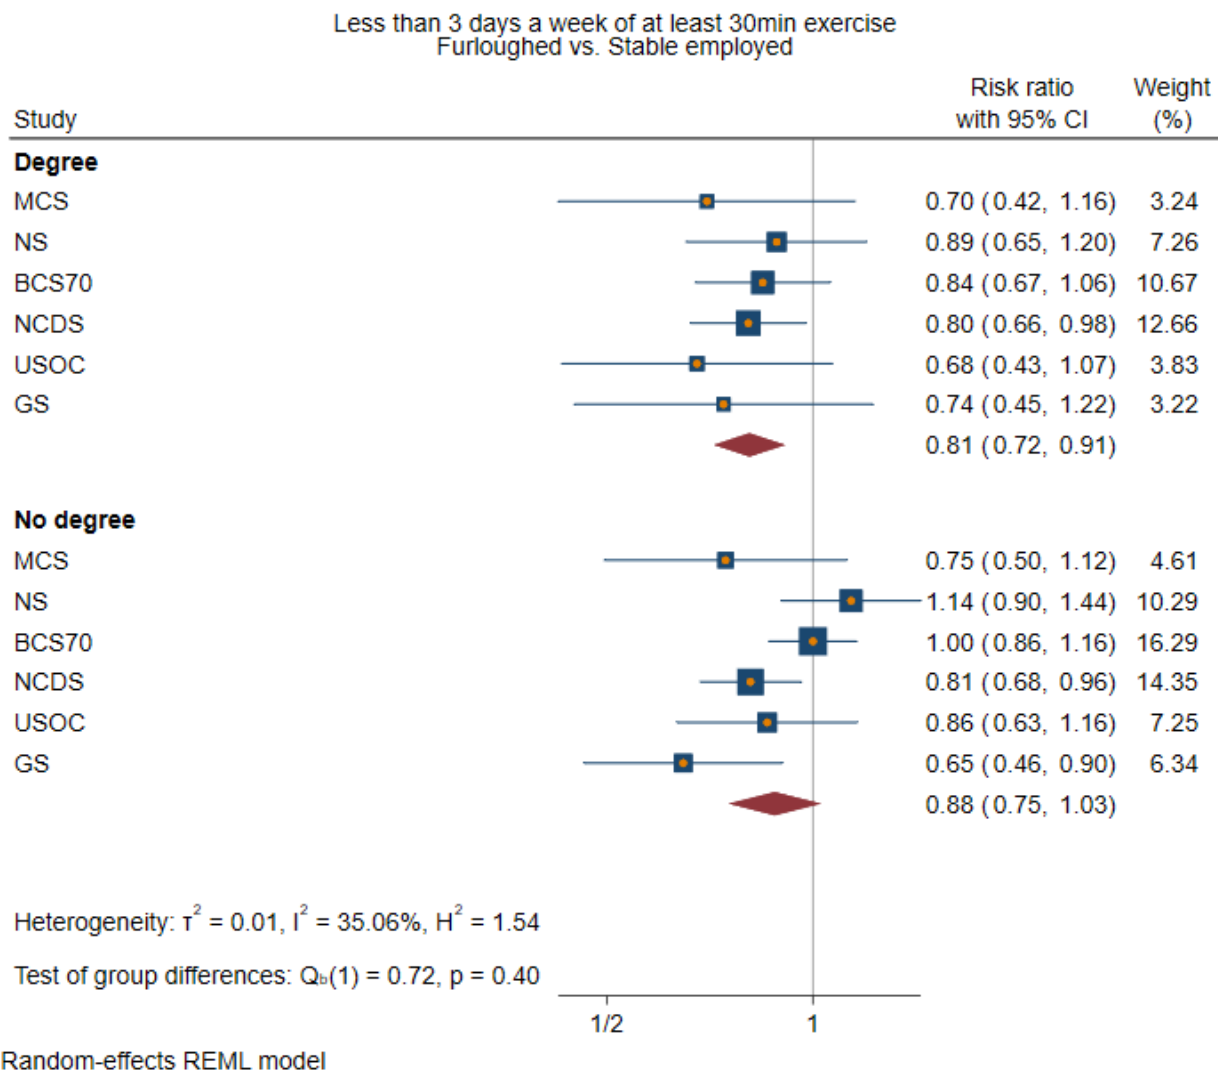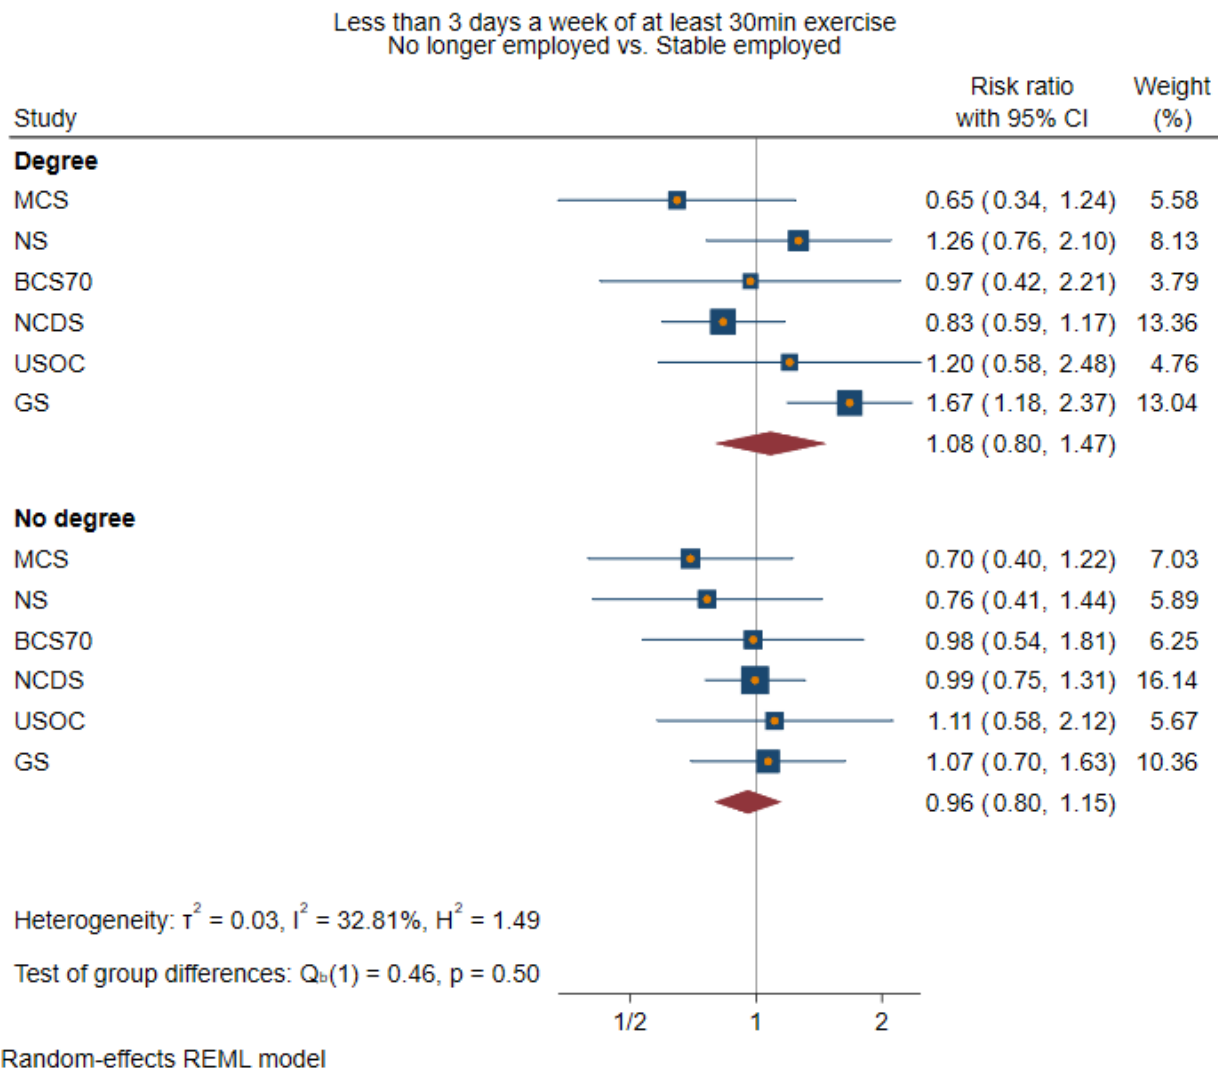



Less than 3 days a week of at least 30min exercise  
Stable unemployed vs. Stable employed

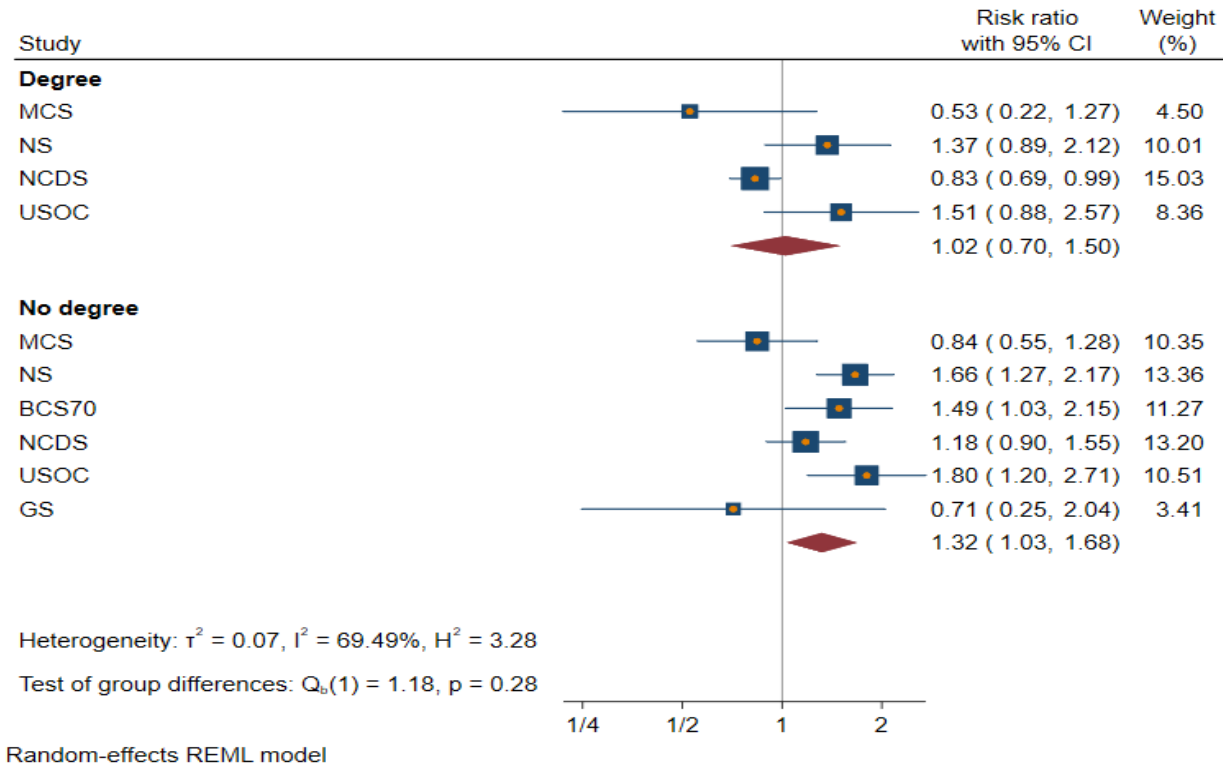

Less than 3 days a week of at least 30min exercise  
Became employed vs. Stable employed

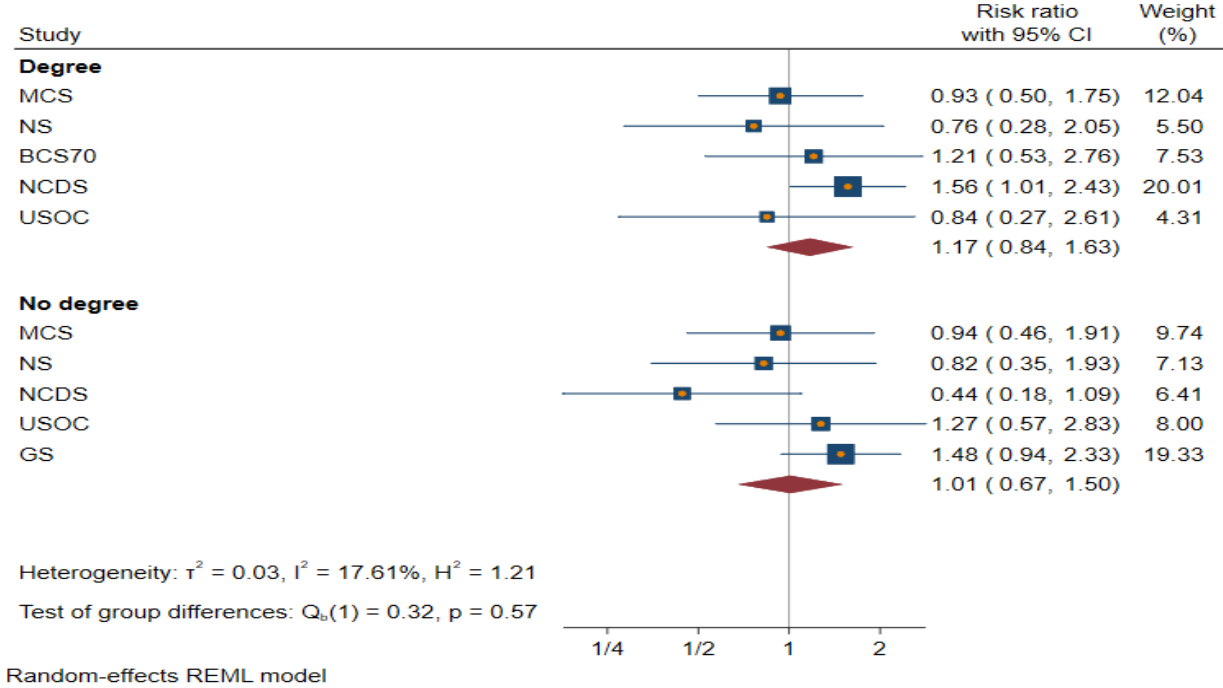

Less than 3 days a week of at least 30min exercise  
Stable non-employed vs. Stable employed

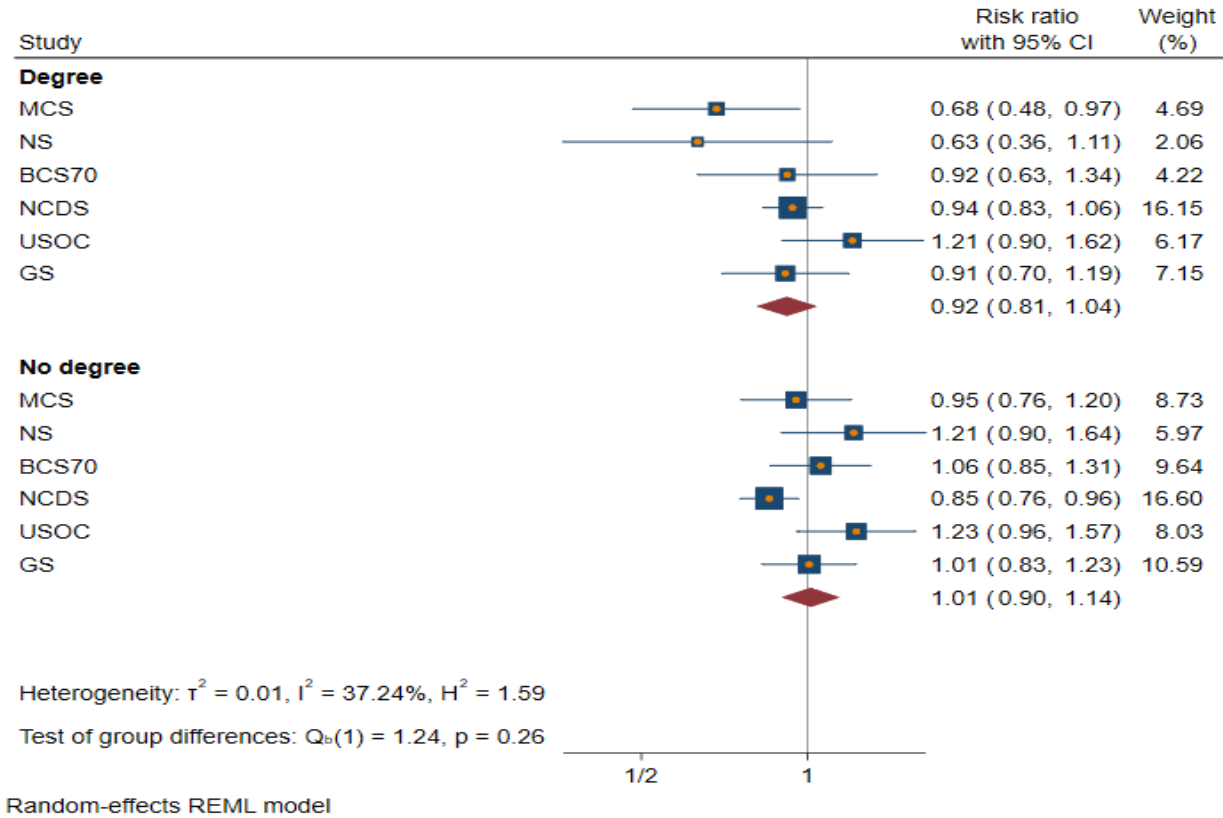

Figure set 16: Less time/ fewer days of physical exercise

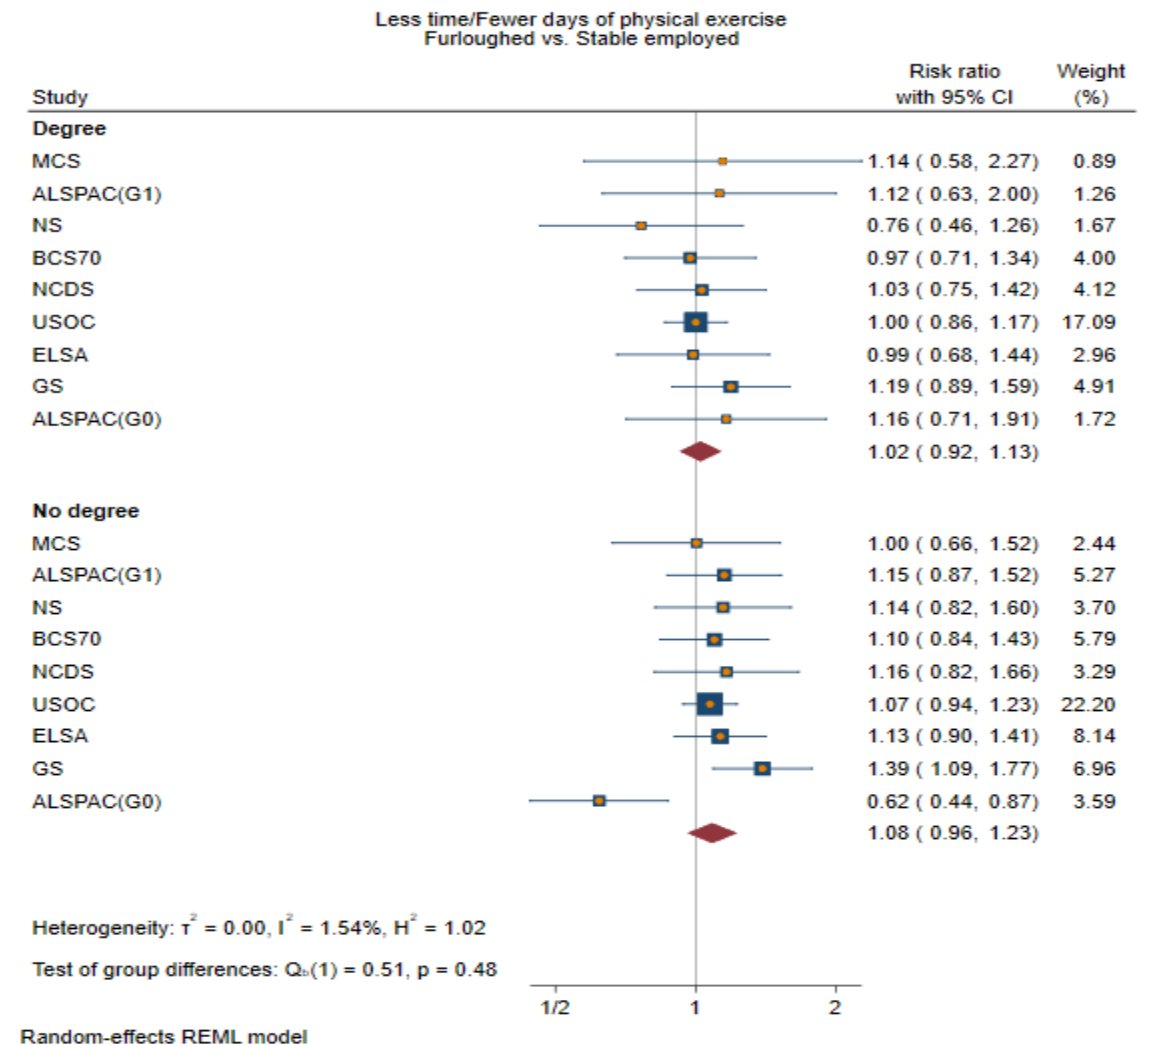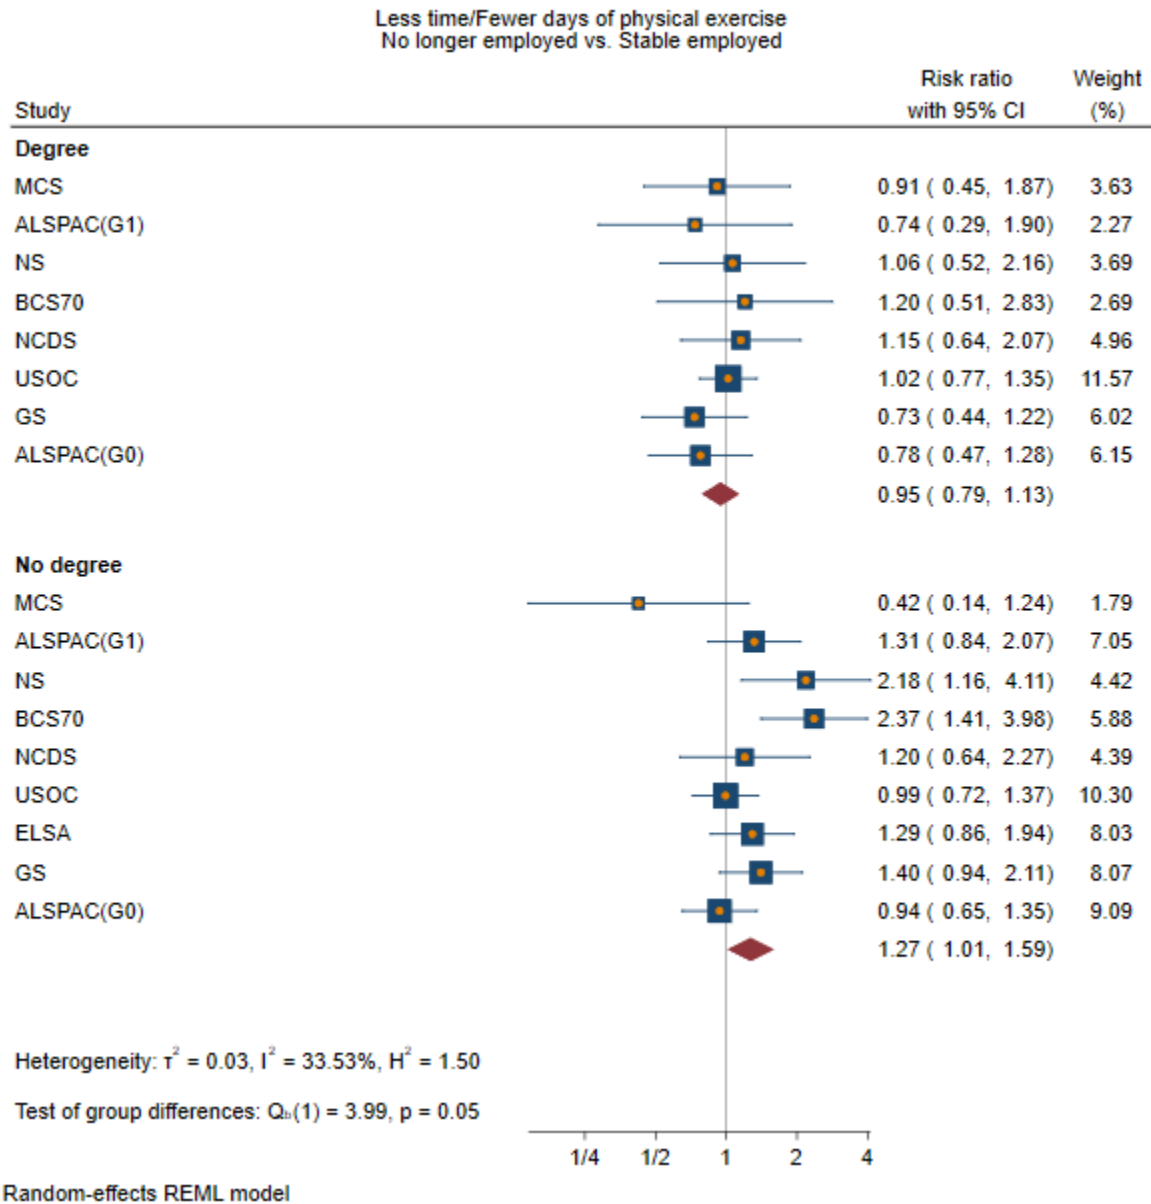

Less time/Fewer days of physical exercise  
Stable unemployed vs. Stable employed

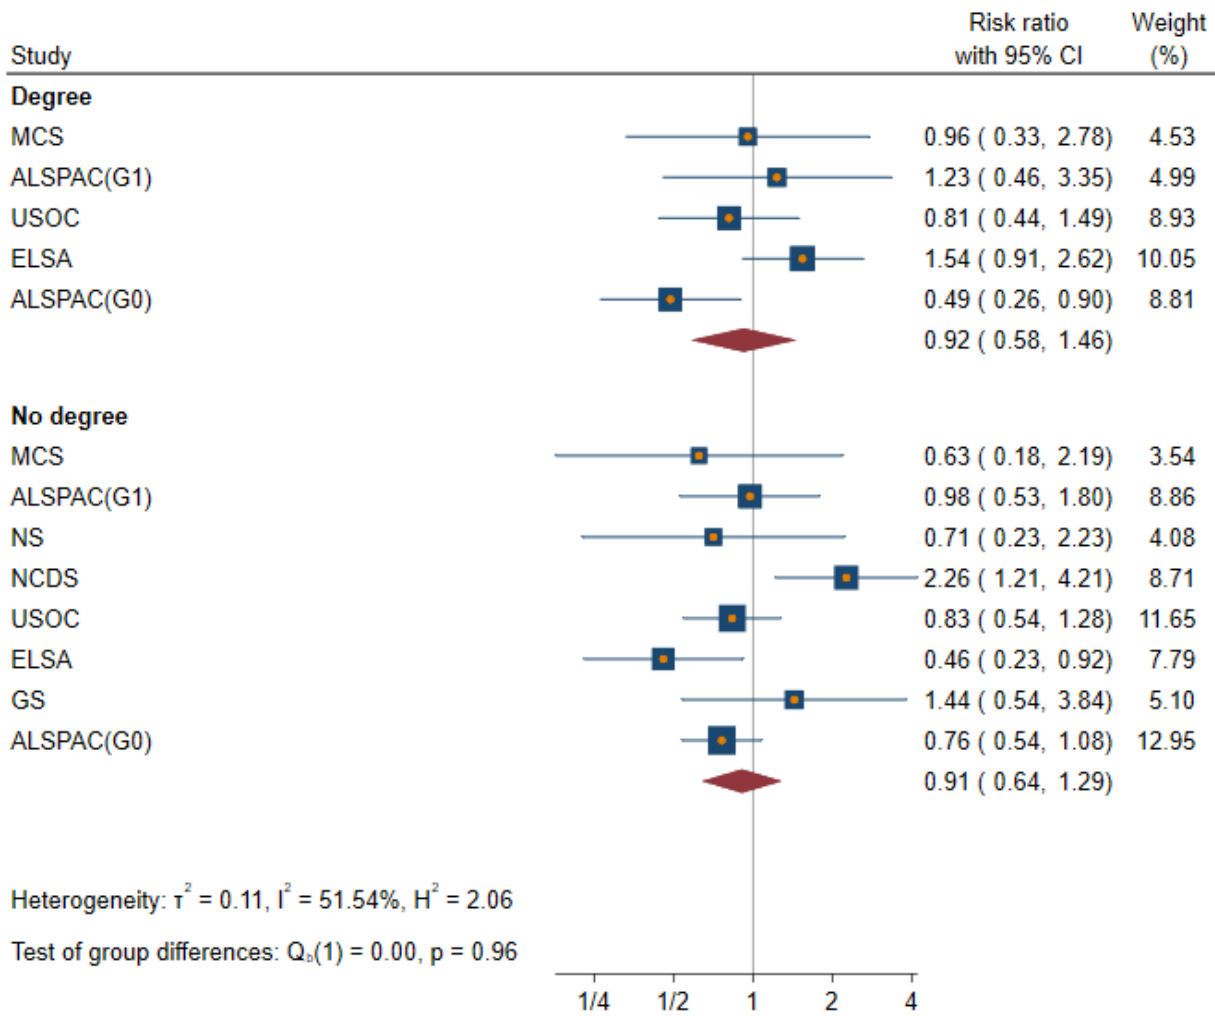

Random-effects REML model

Less time/Fewer days of physical exercise  
Became employed vs. Stable employed

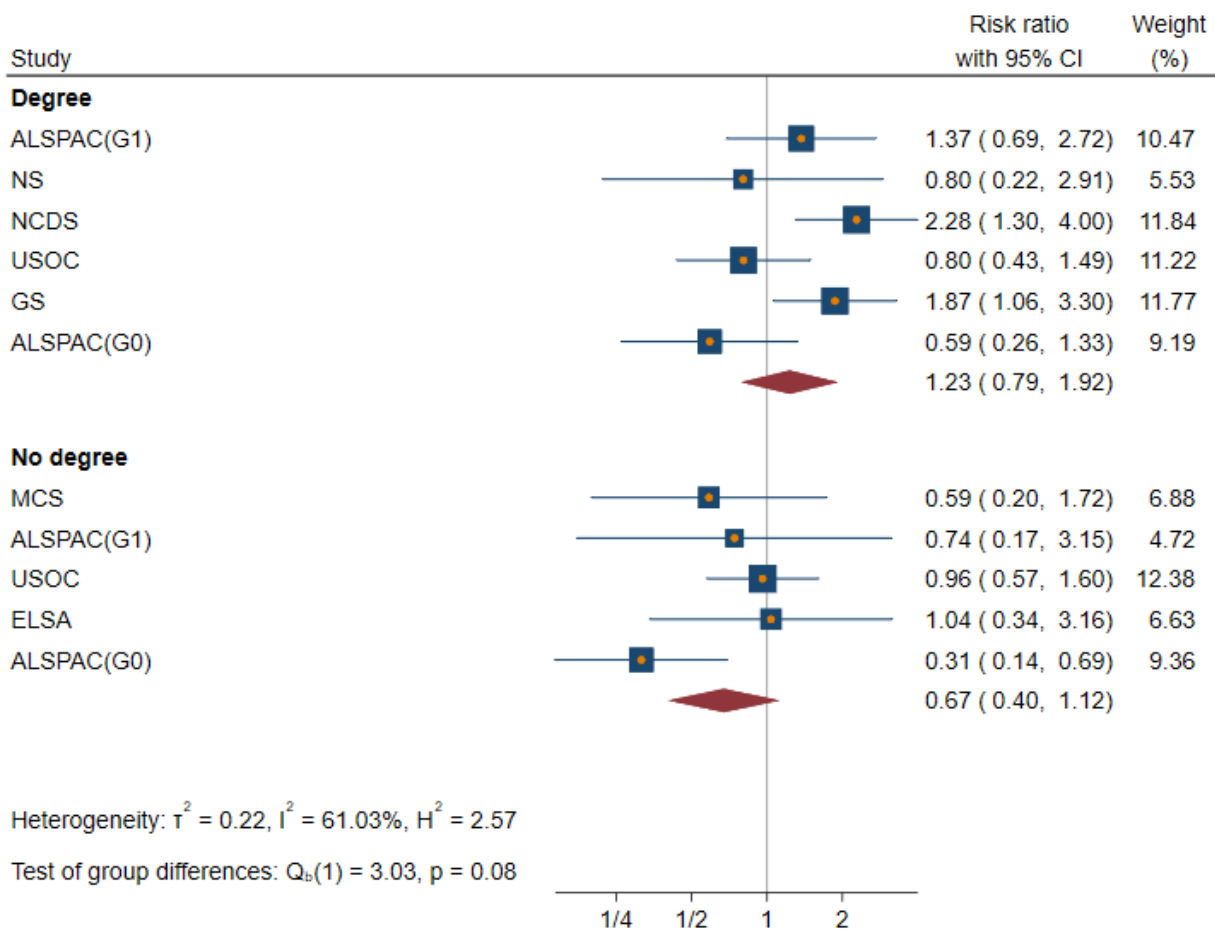

Random-effects REML model

Less time/Fewer days of physical exercise  
Stable non-employed vs. Stable employed

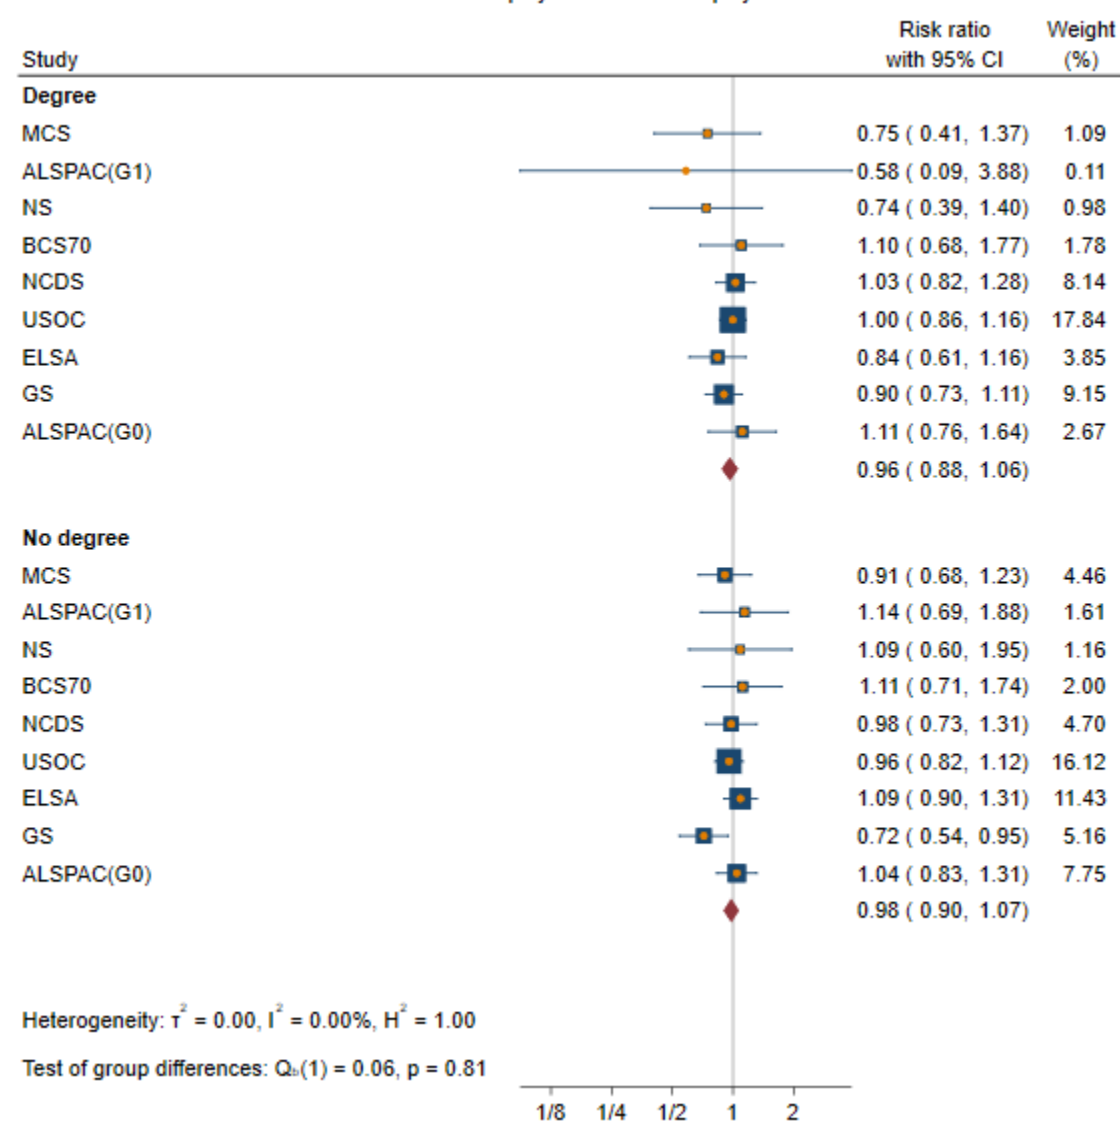

Figure set 17: More time/ days of physical exercise

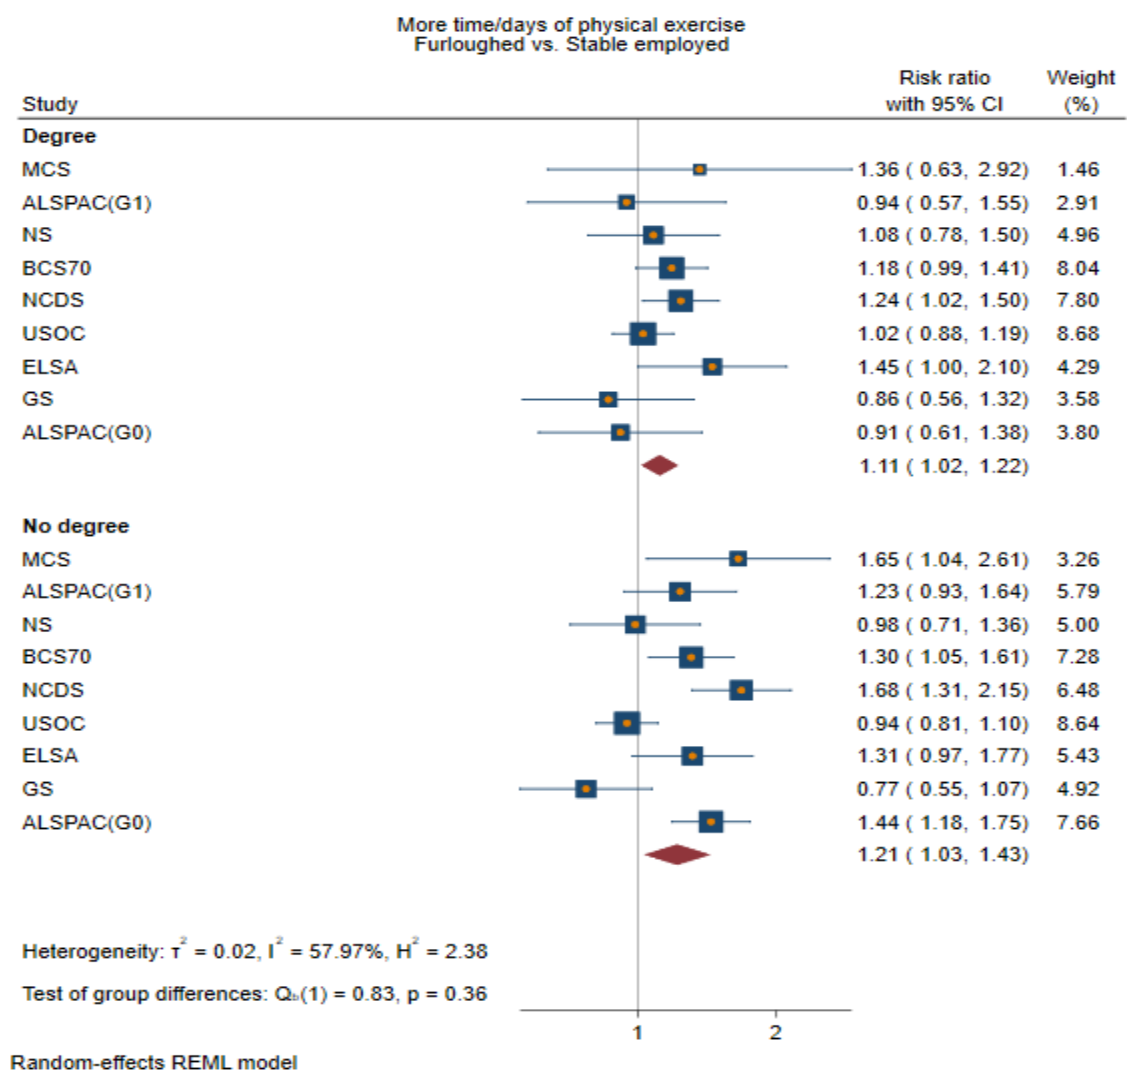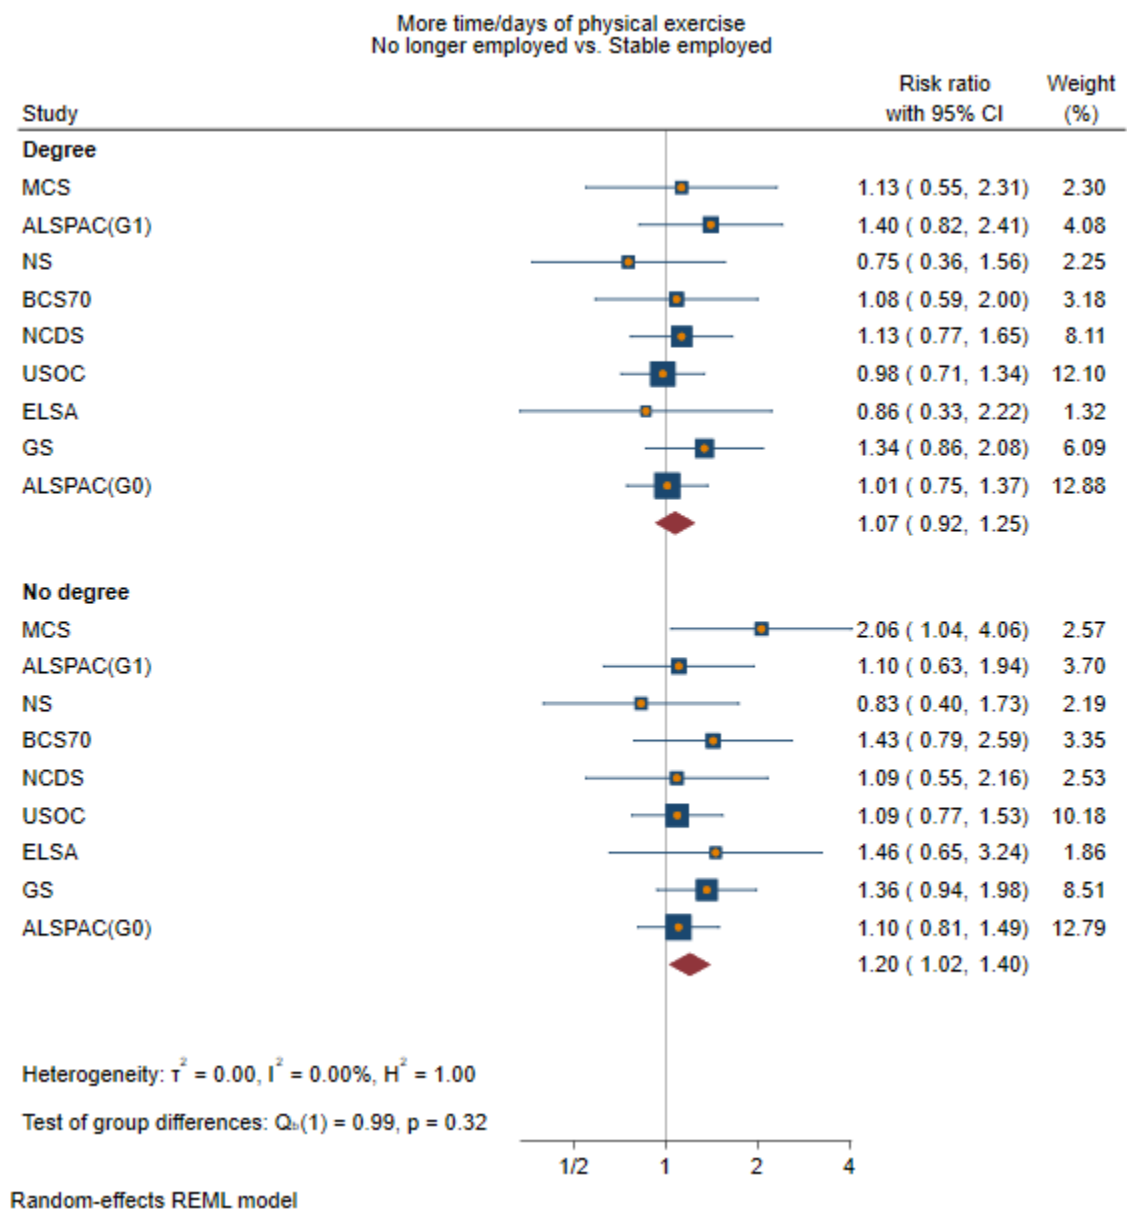

More time/days of physical exercise  
Stable unemployed vs. Stable employed

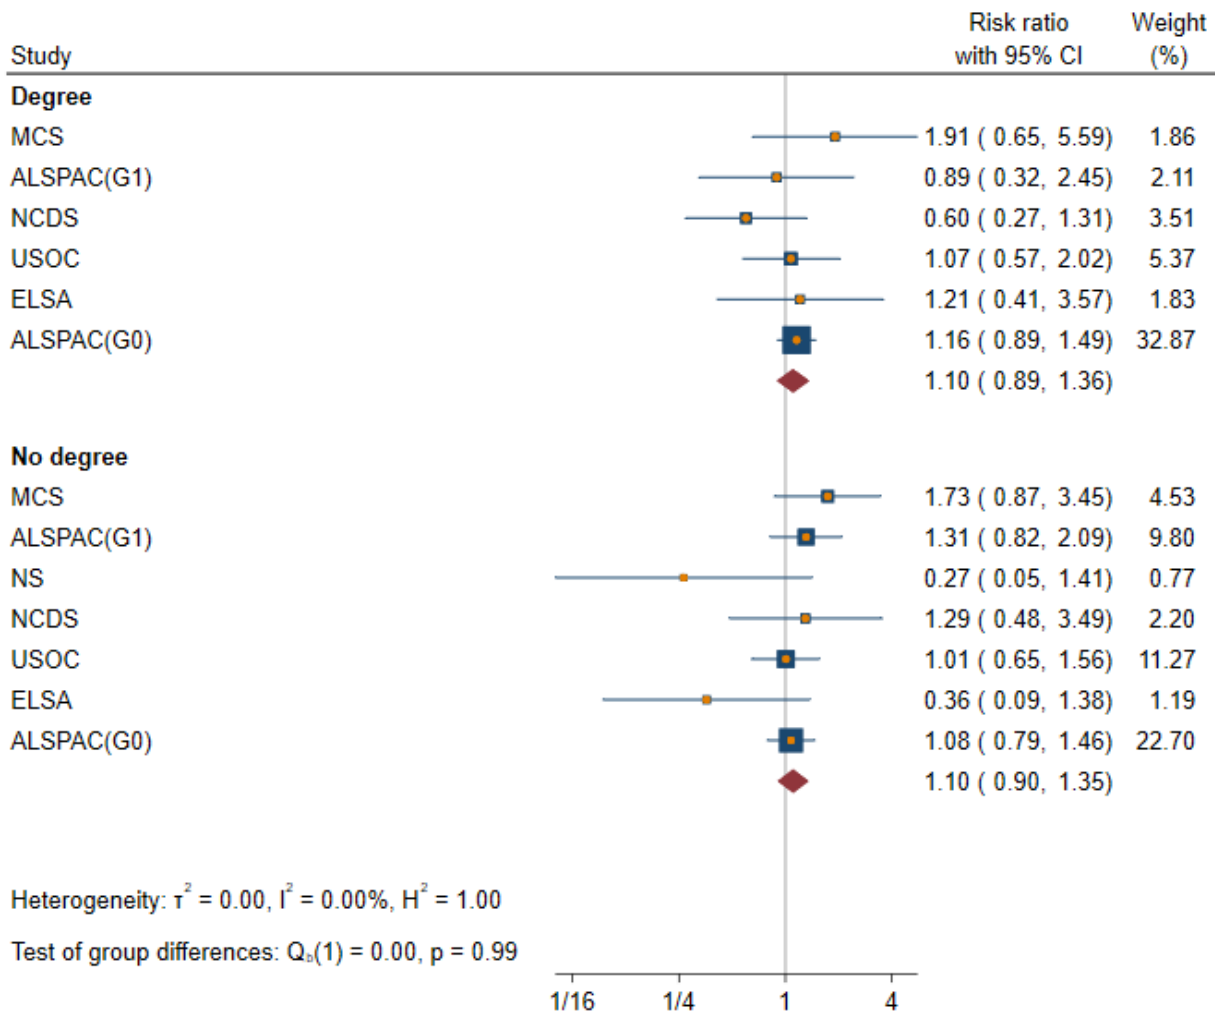

Random-effects REML model

More time/days of physical exercise  
Became employed vs. Stable employed

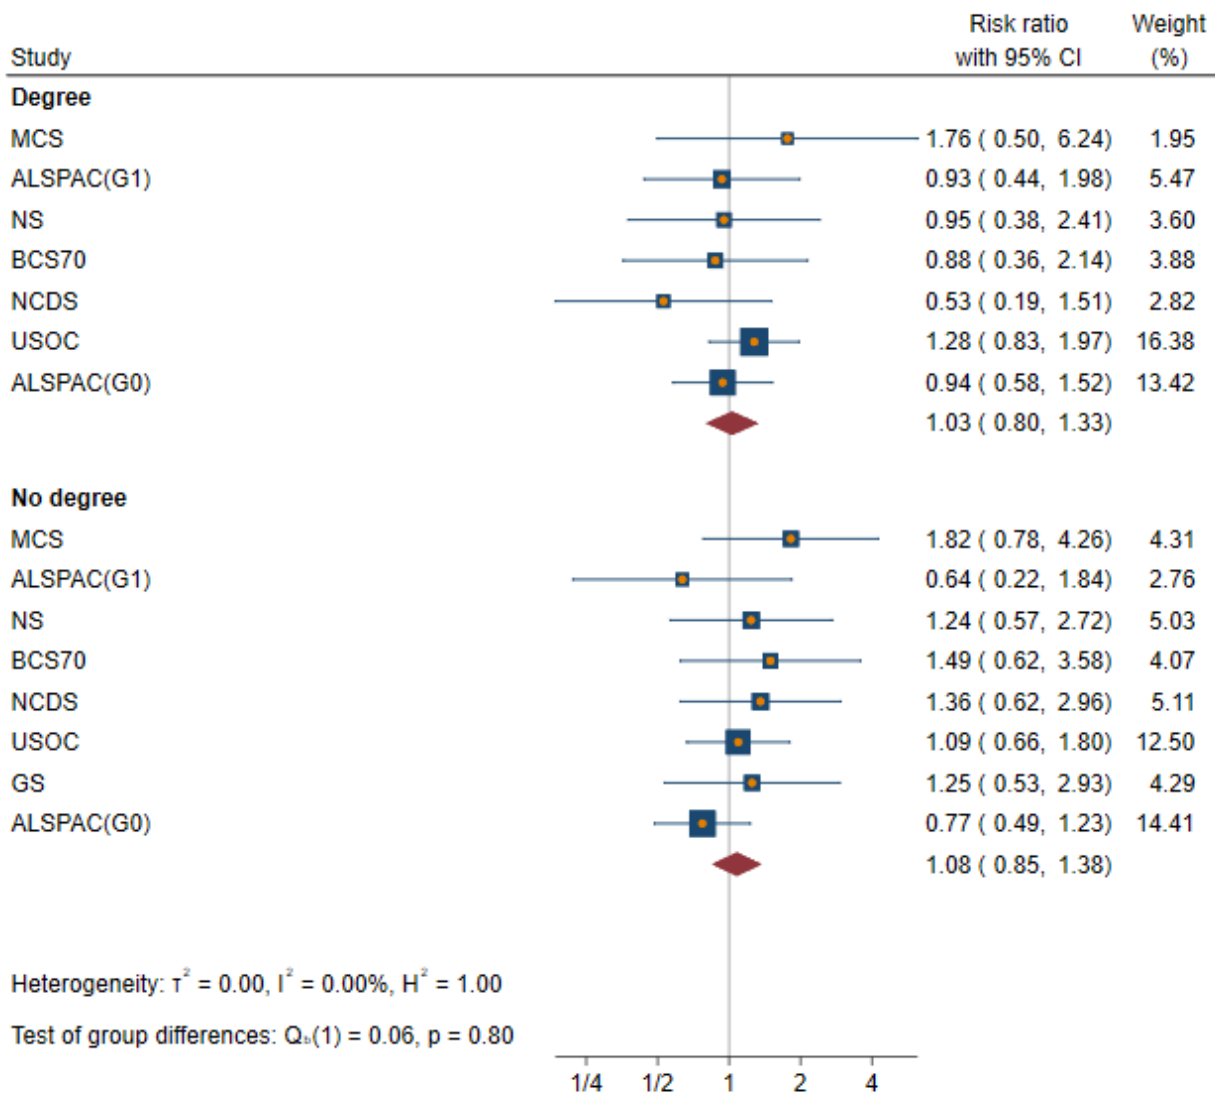

Random-effects REML model

More time/days of physical exercise  
Stable non-employed vs. Stable employed

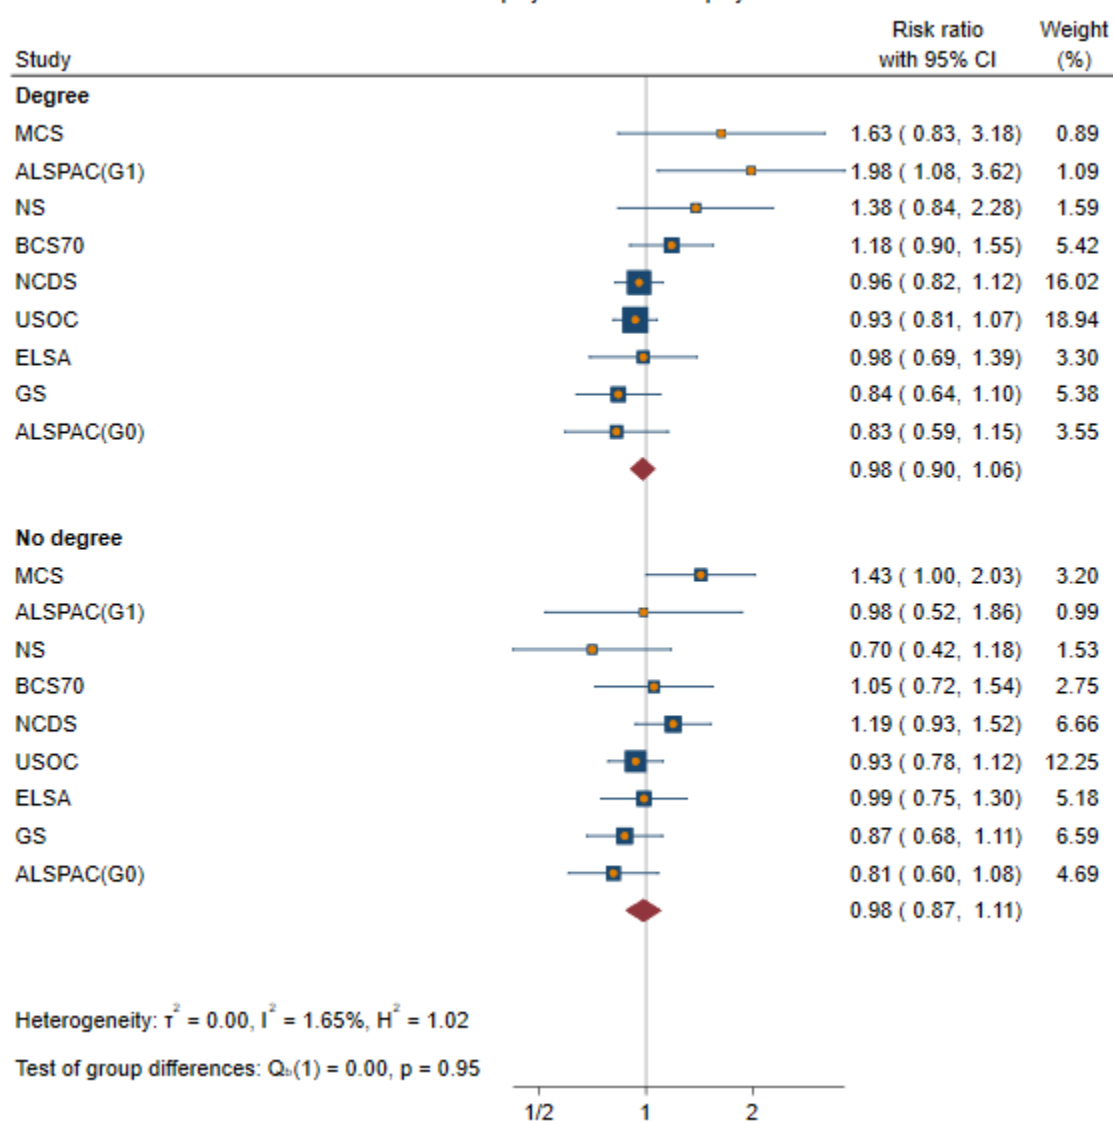

Figure set 18: Sleeps outside ‘normal range’ (i.e. <6 or 9+ hours)

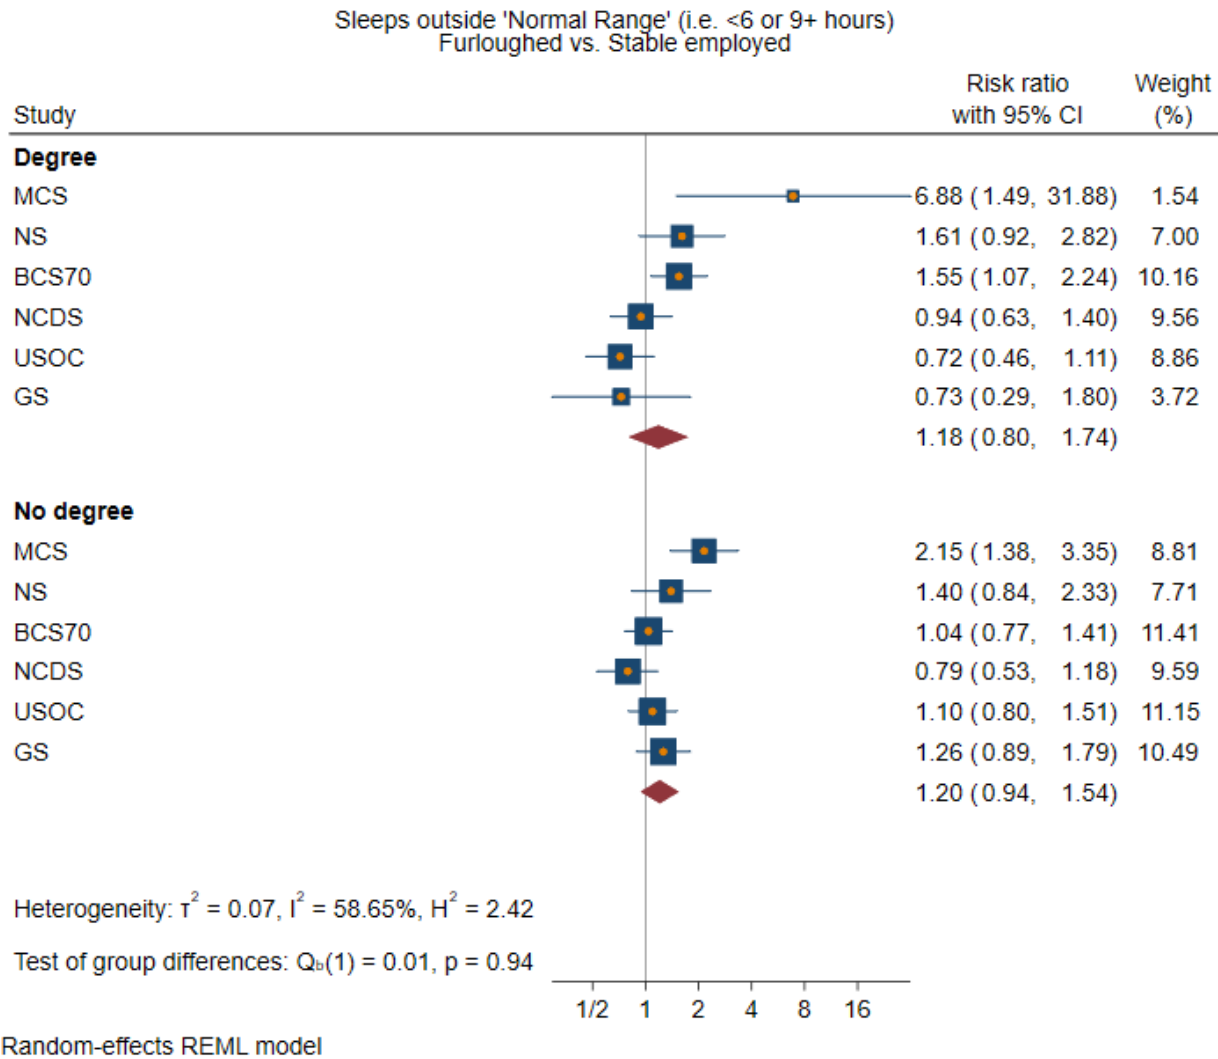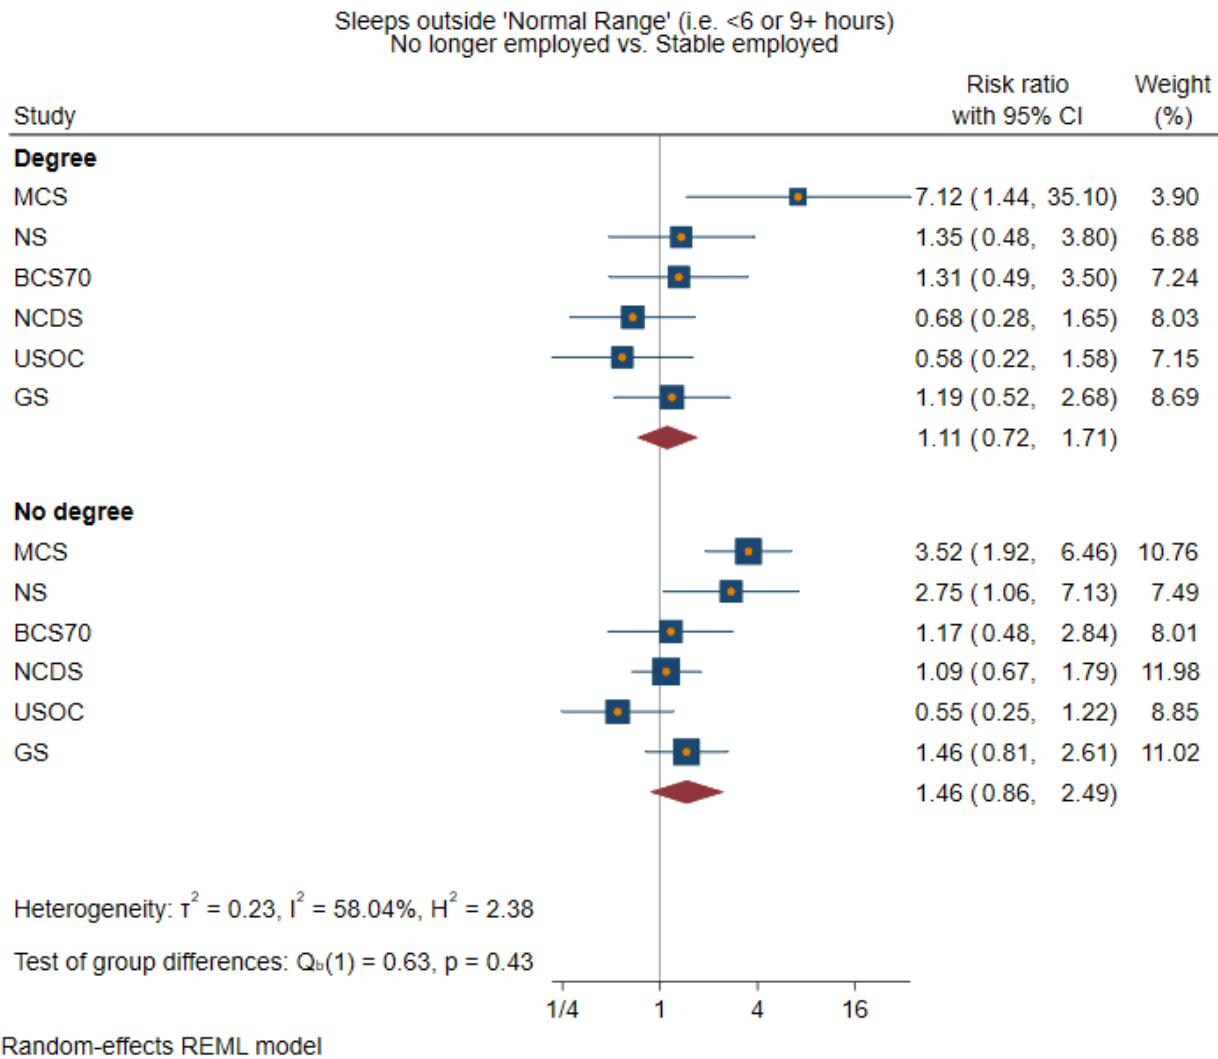



Sleeps outside 'Normal Range' (i.e. <6 or 9+ hours)  
Stable unemployed vs. Stable employed

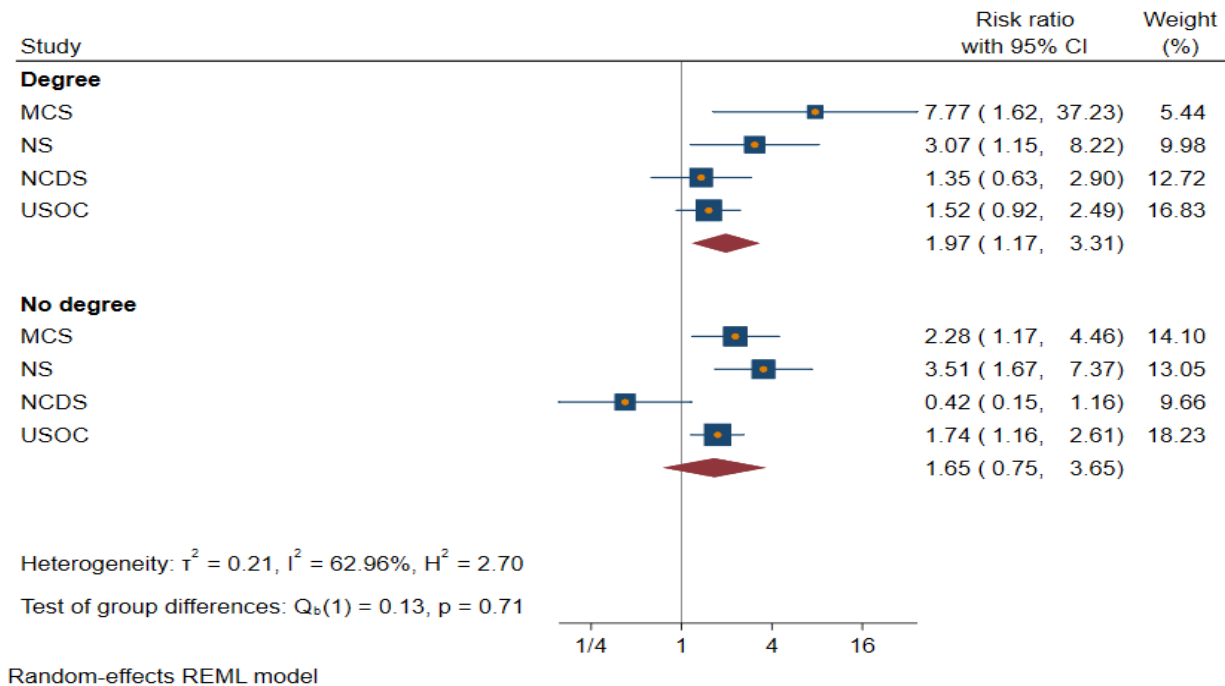

Sleeps outside 'Normal Range' (i.e. <6 or 9+ hours)  
Became employed vs. Stable employed

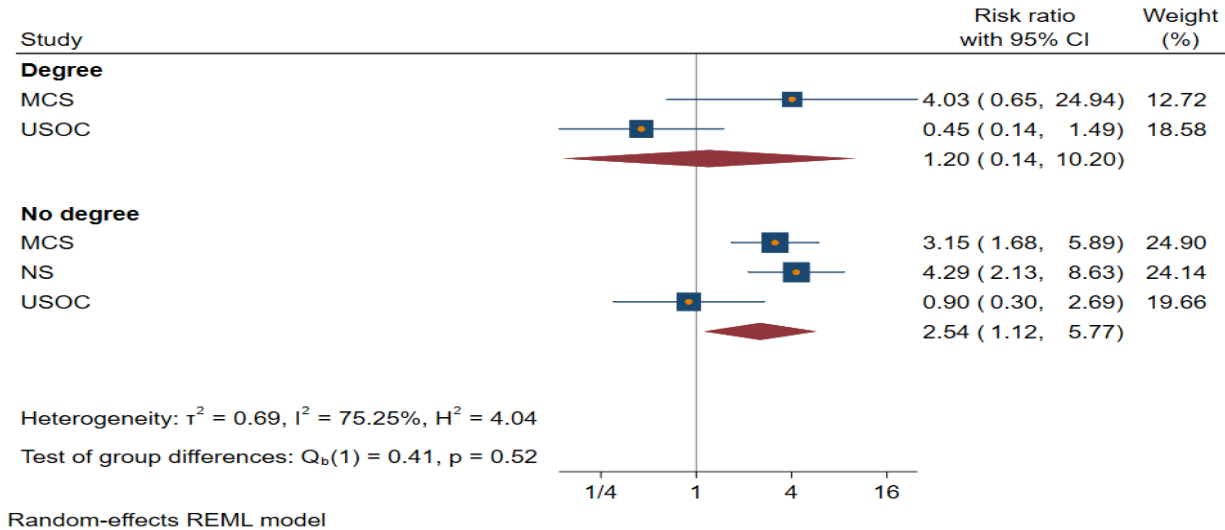

Sleeps outside 'Normal Range' (i.e. <6 or 9+ hours)  
Stable non-employed vs. Stable employed

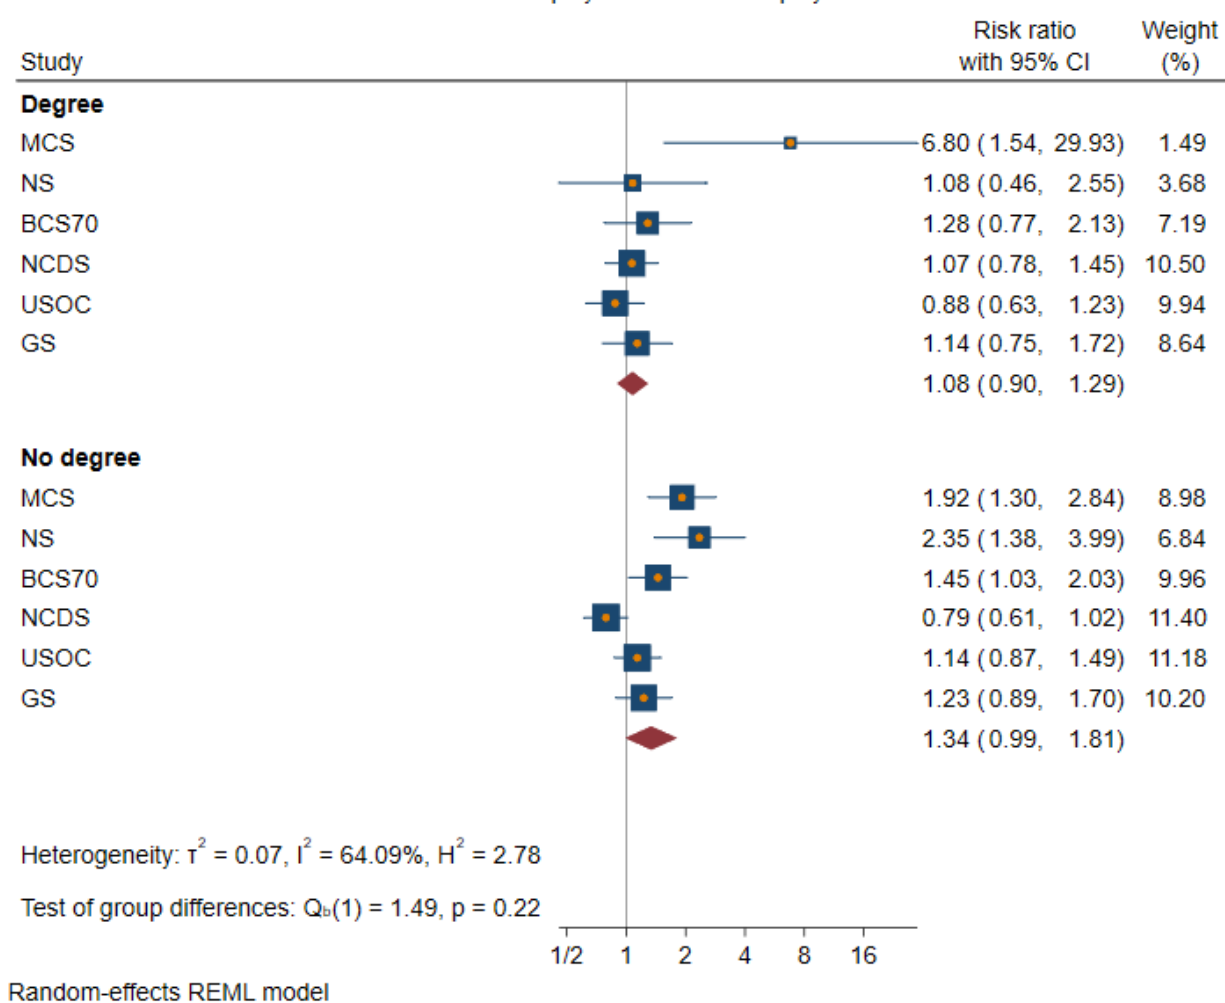

Figure set 19: Sleeps less than before

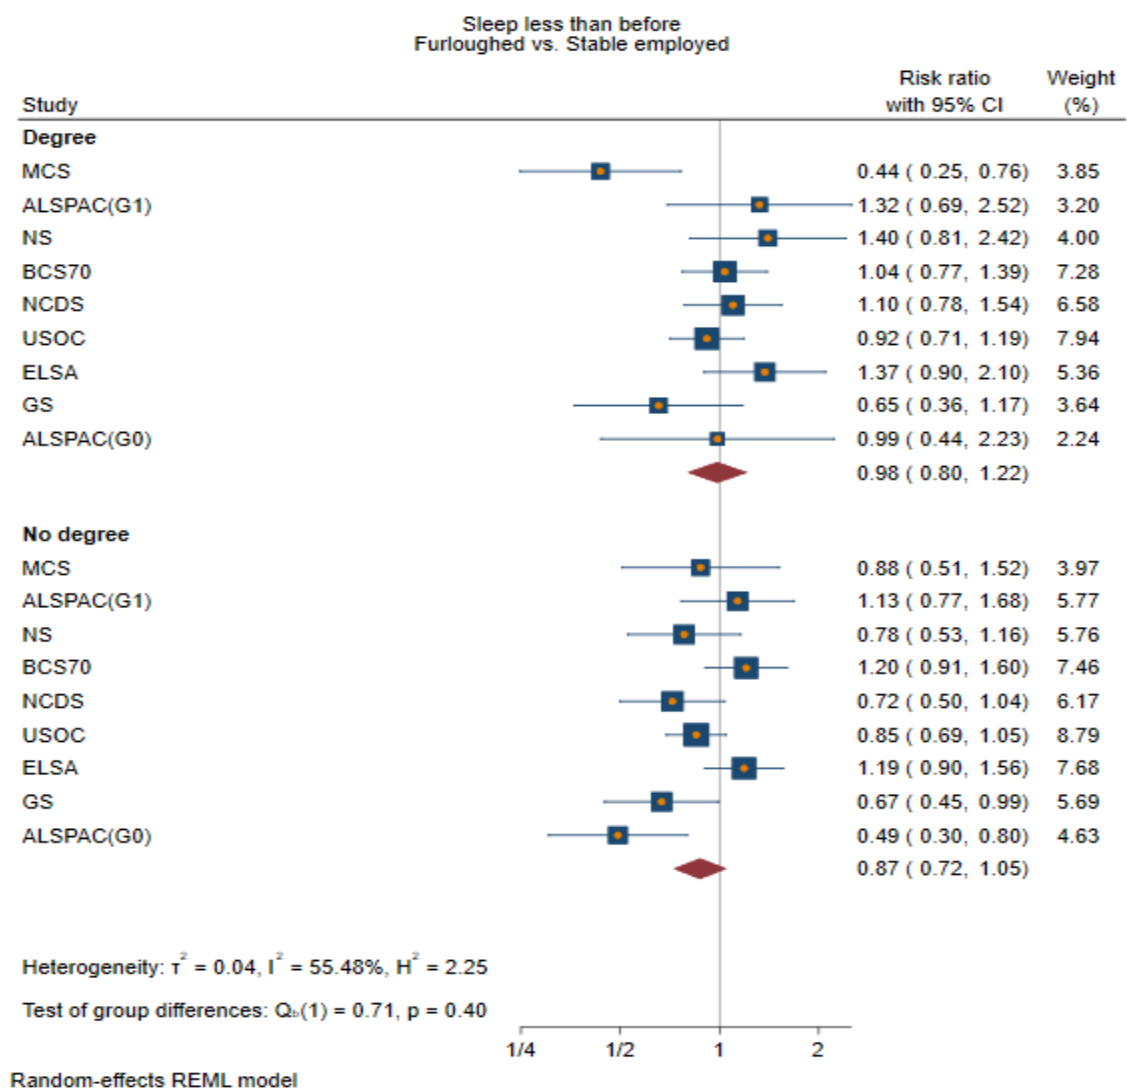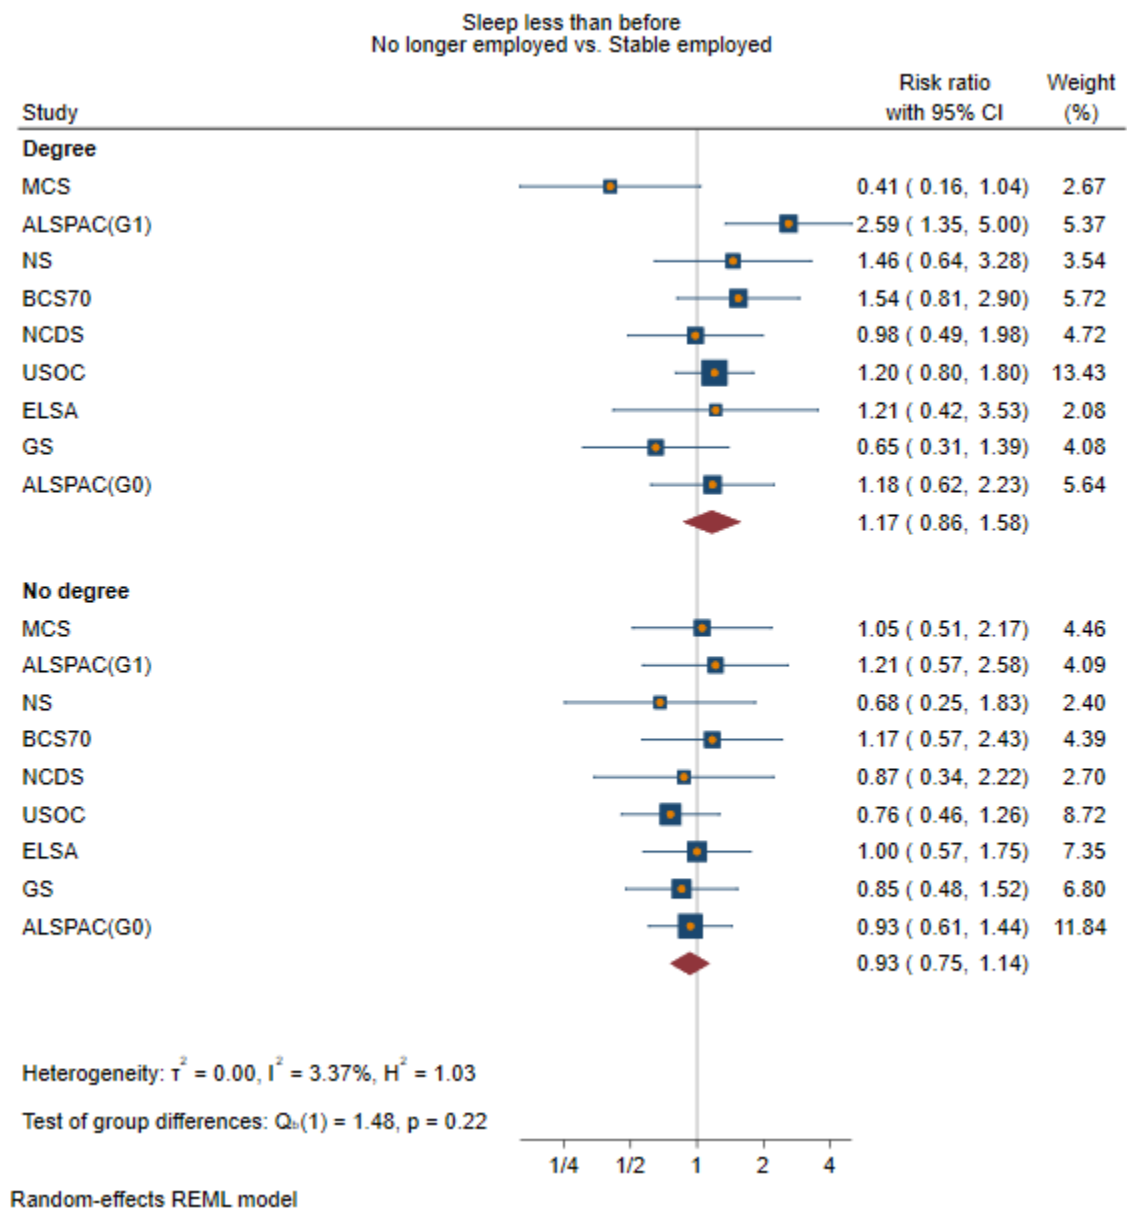

Sleep less than before  
Stable unemployed vs. Stable employed

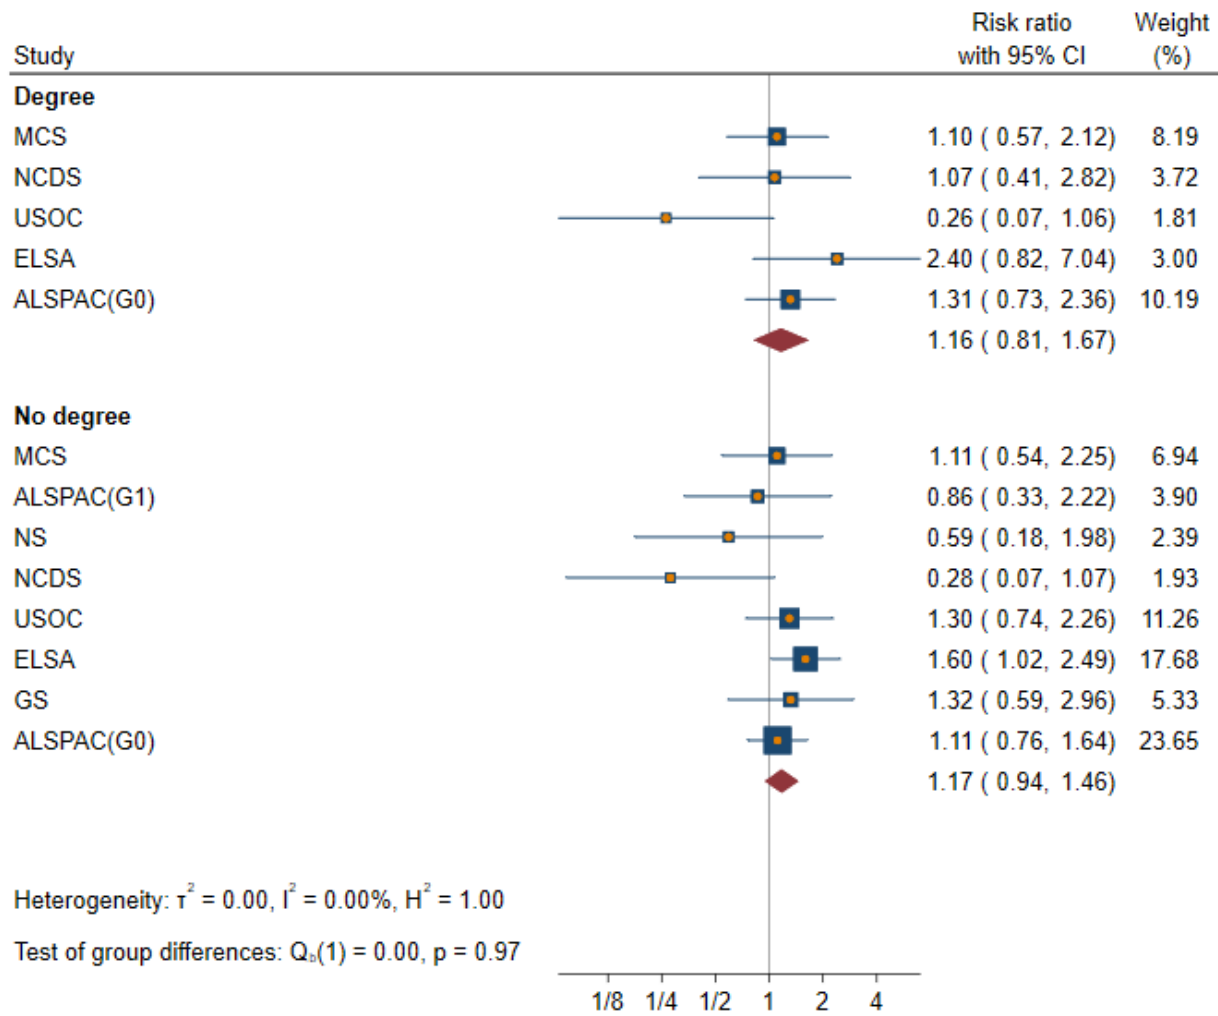

Random-effects REML model

Sleep less than before  
Became employed vs. Stable employed

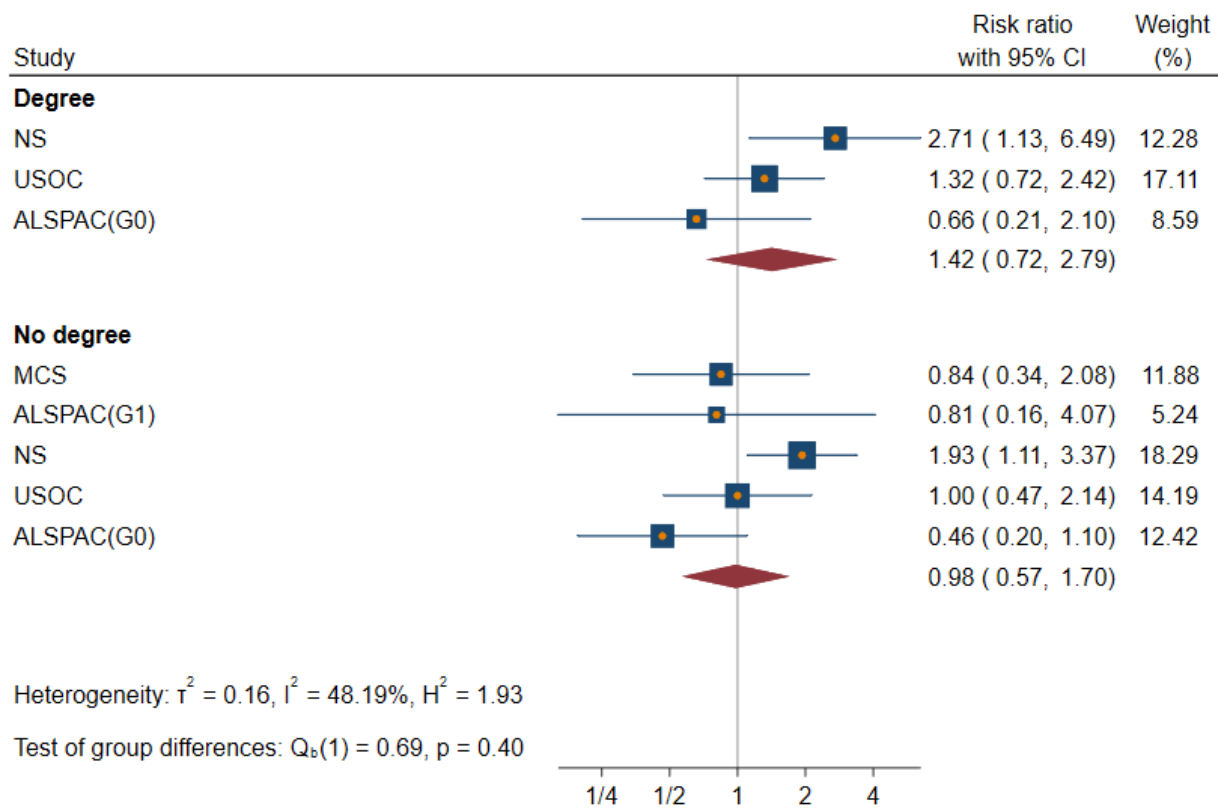

Random-effects REML model

Sleep less than before  
Stable non-employed vs. Stable employed

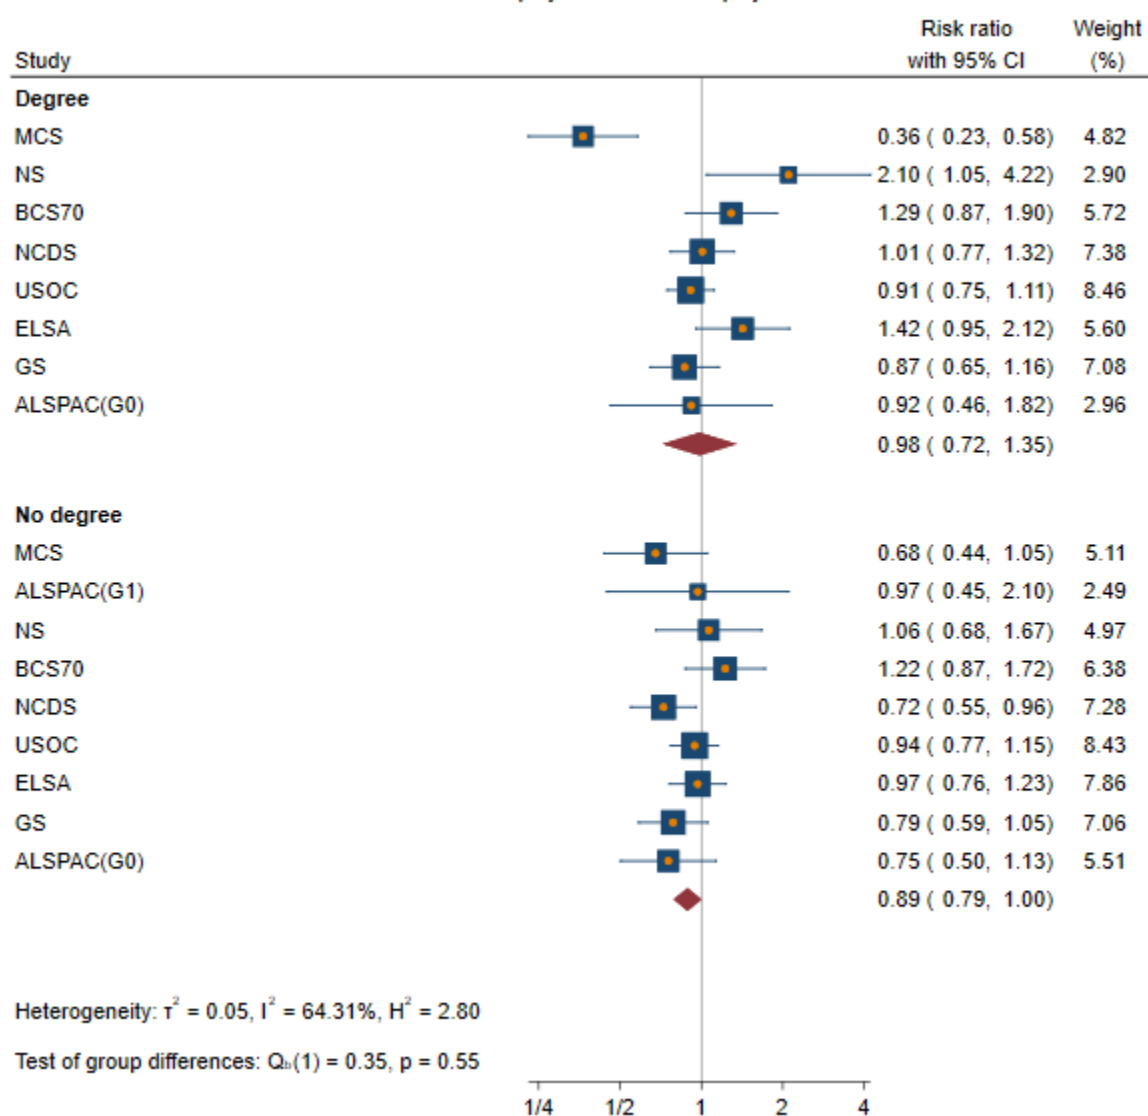

Figure set 20: Sleeps more than before

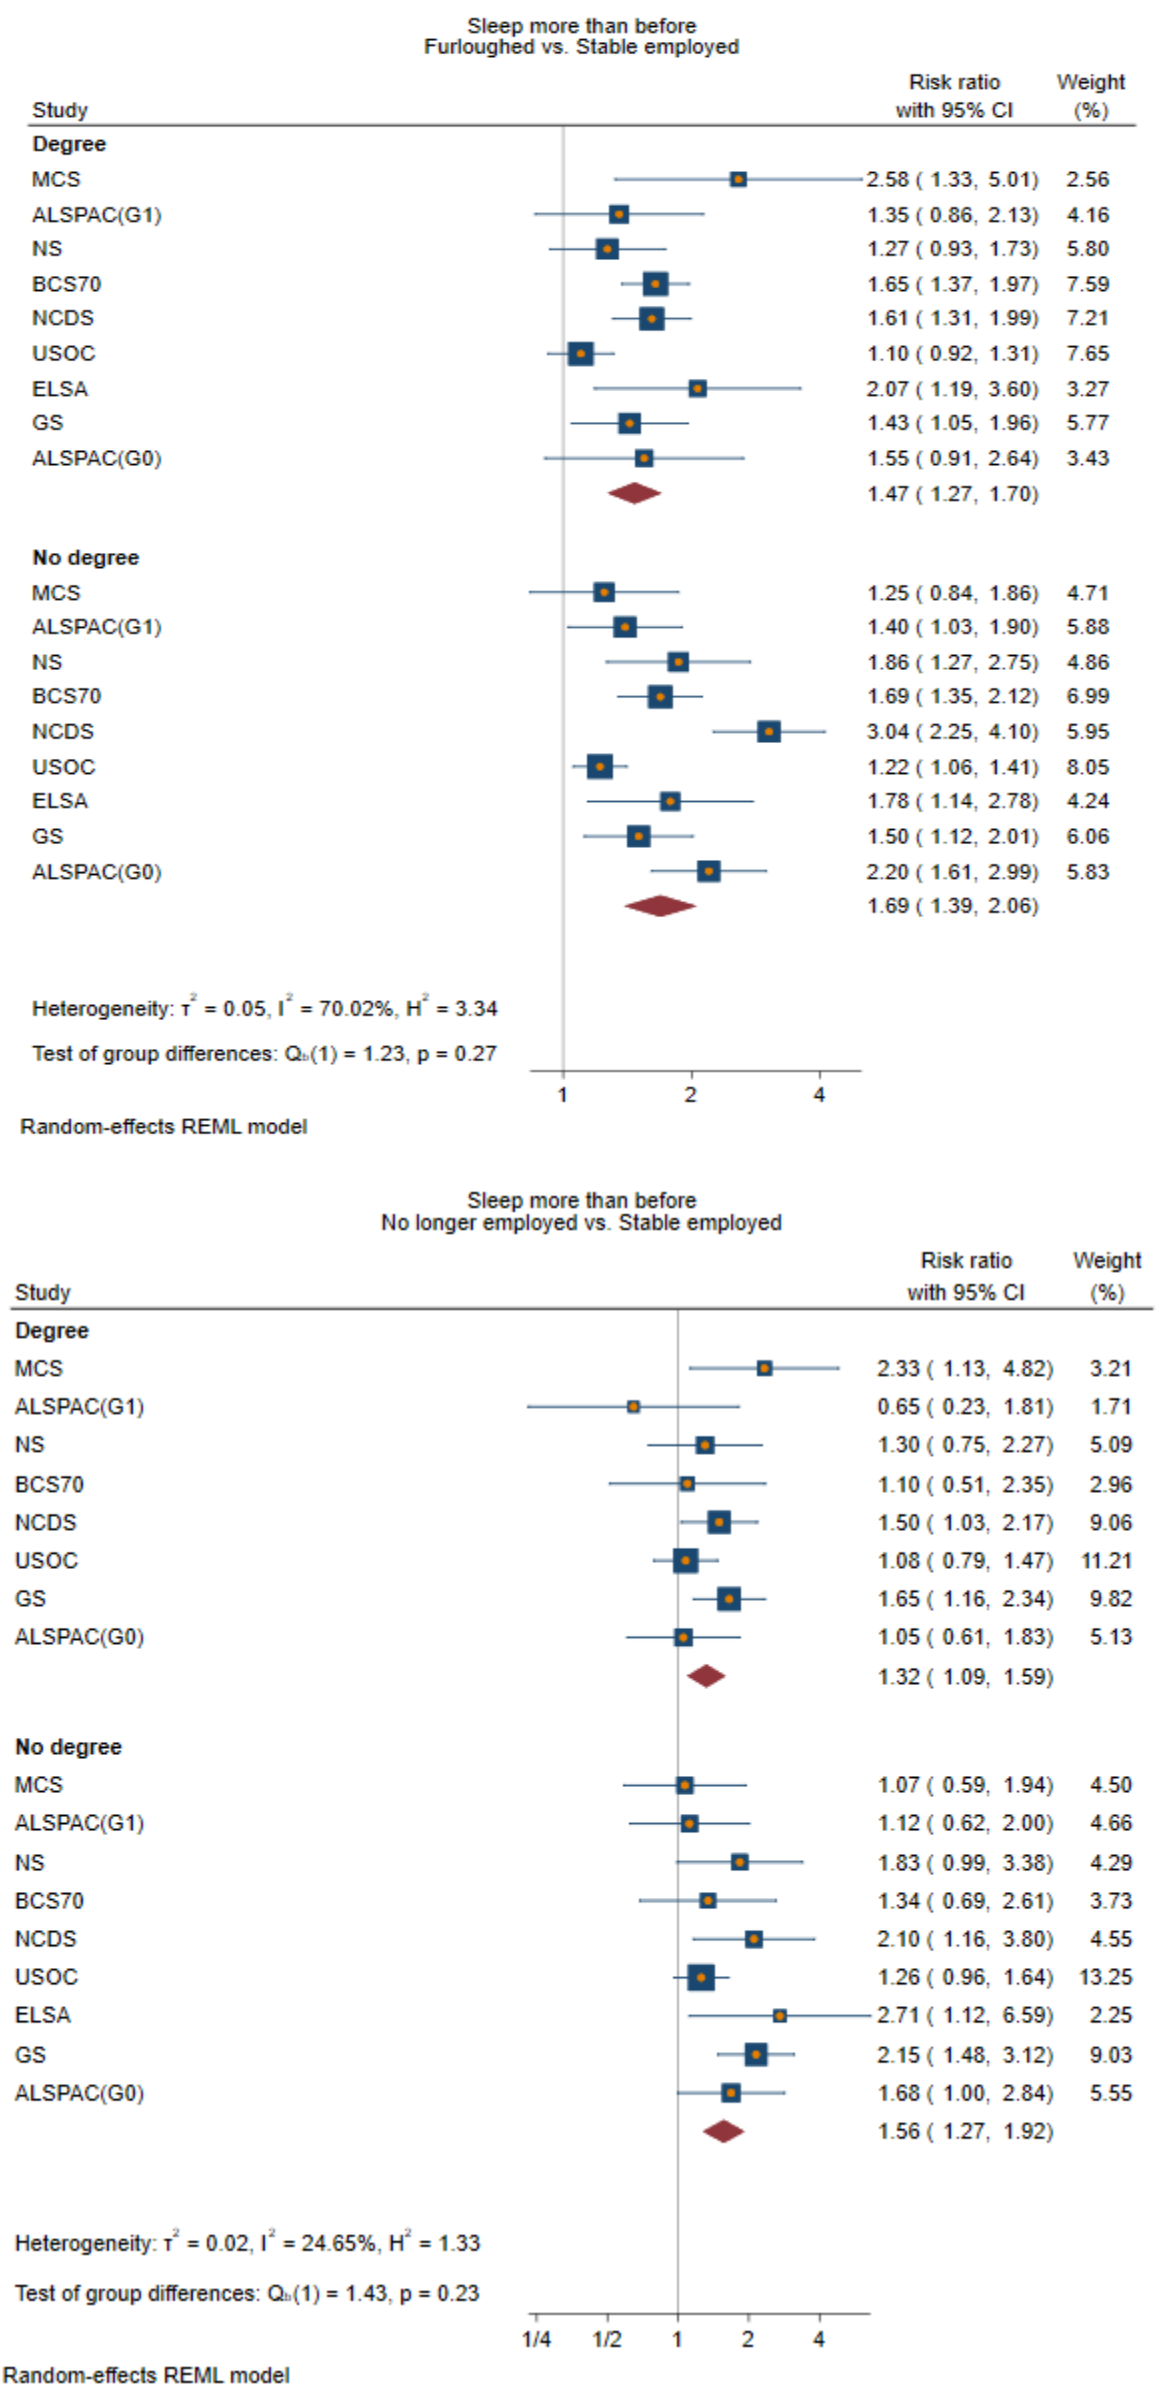

Sleep more than before  
Stable unemployed vs. Stable employed

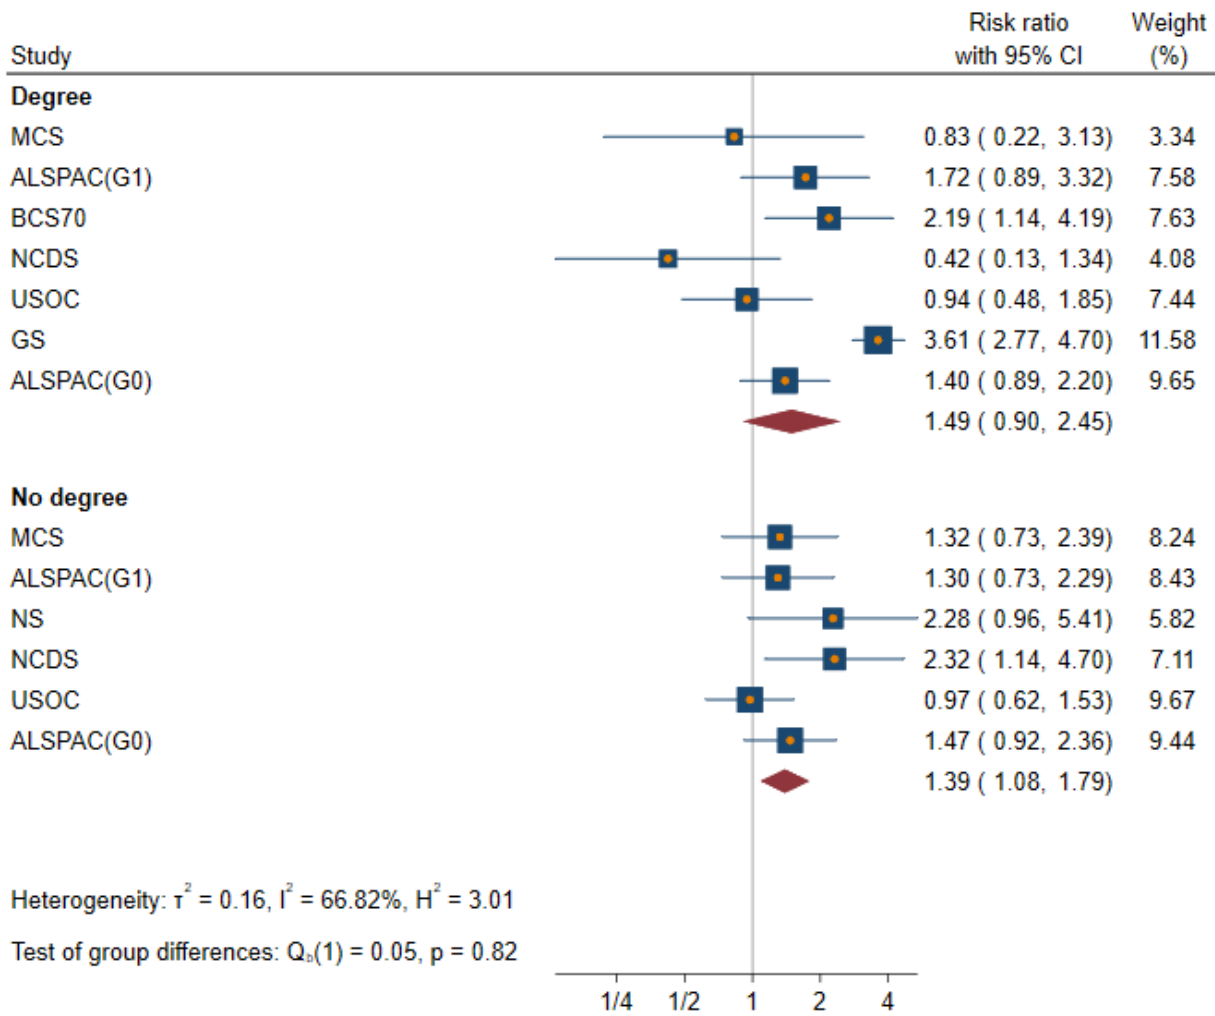

Random-effects REML model

Sleep more than before  
Became employed vs. Stable employed

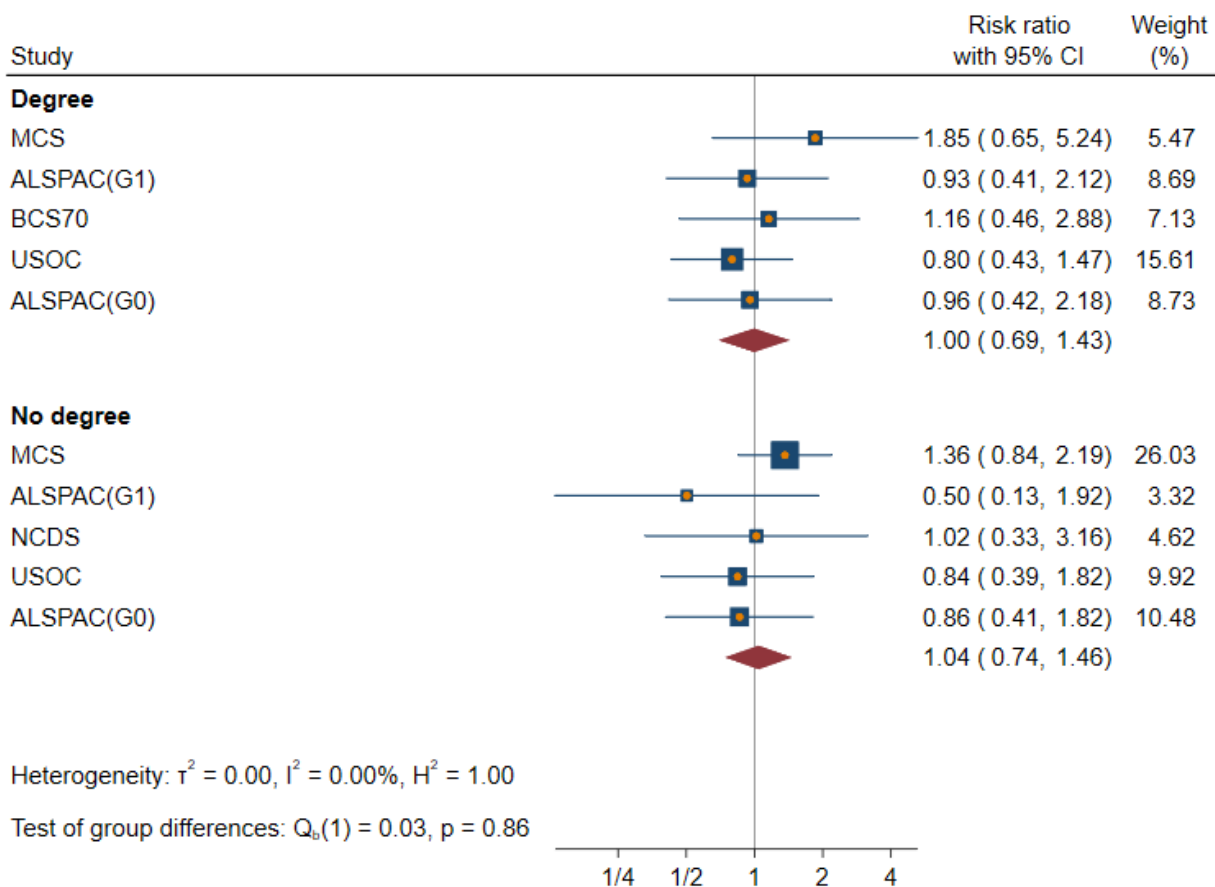

Random-effects REML model

Sleep more than before  
Stable non-employed vs. Stable employed

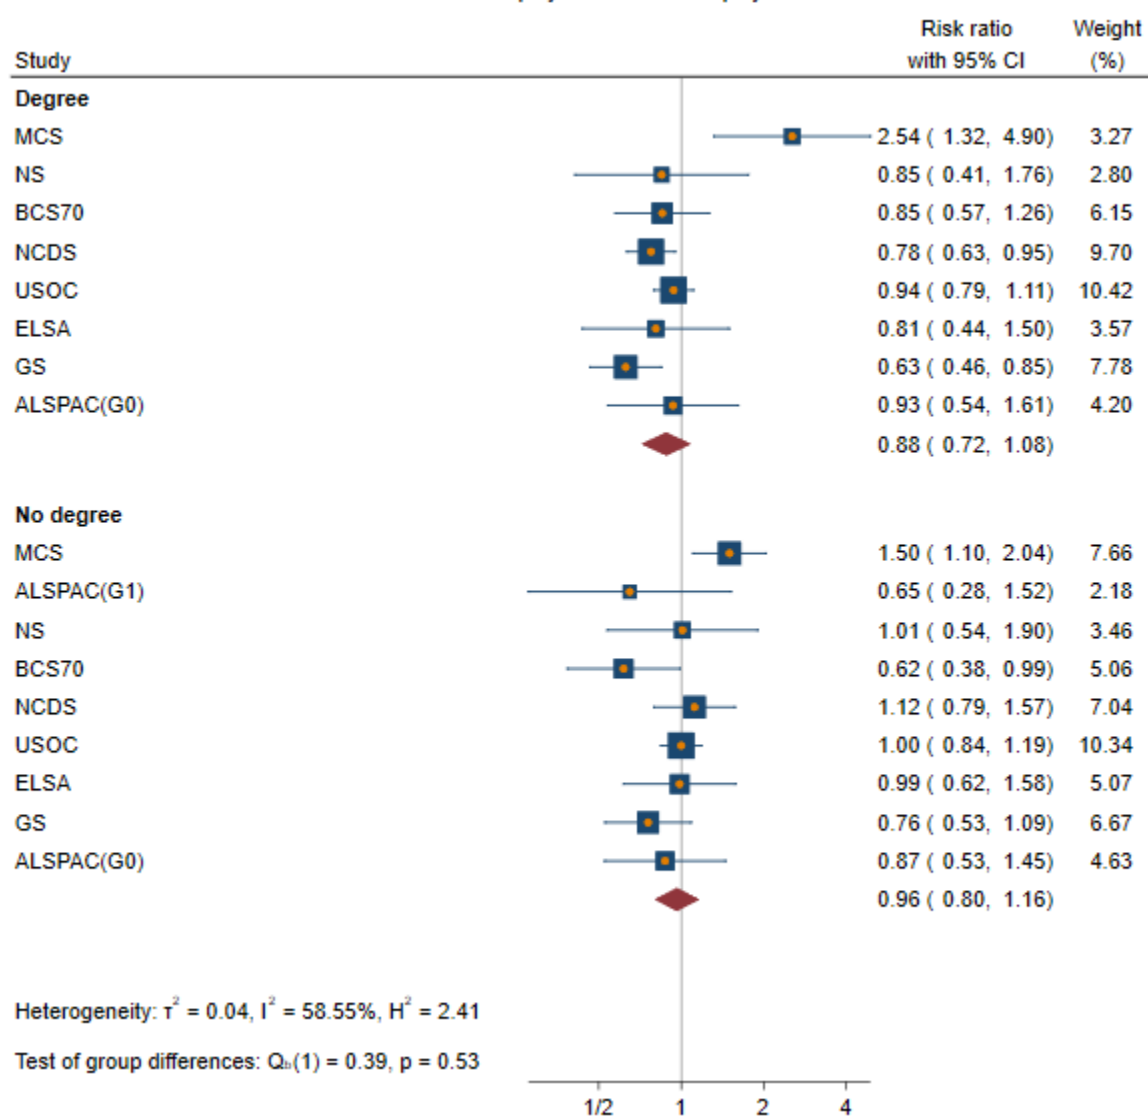

Random-effects REML model

Figure set 21: From 6/9h a night to ‘normal range’

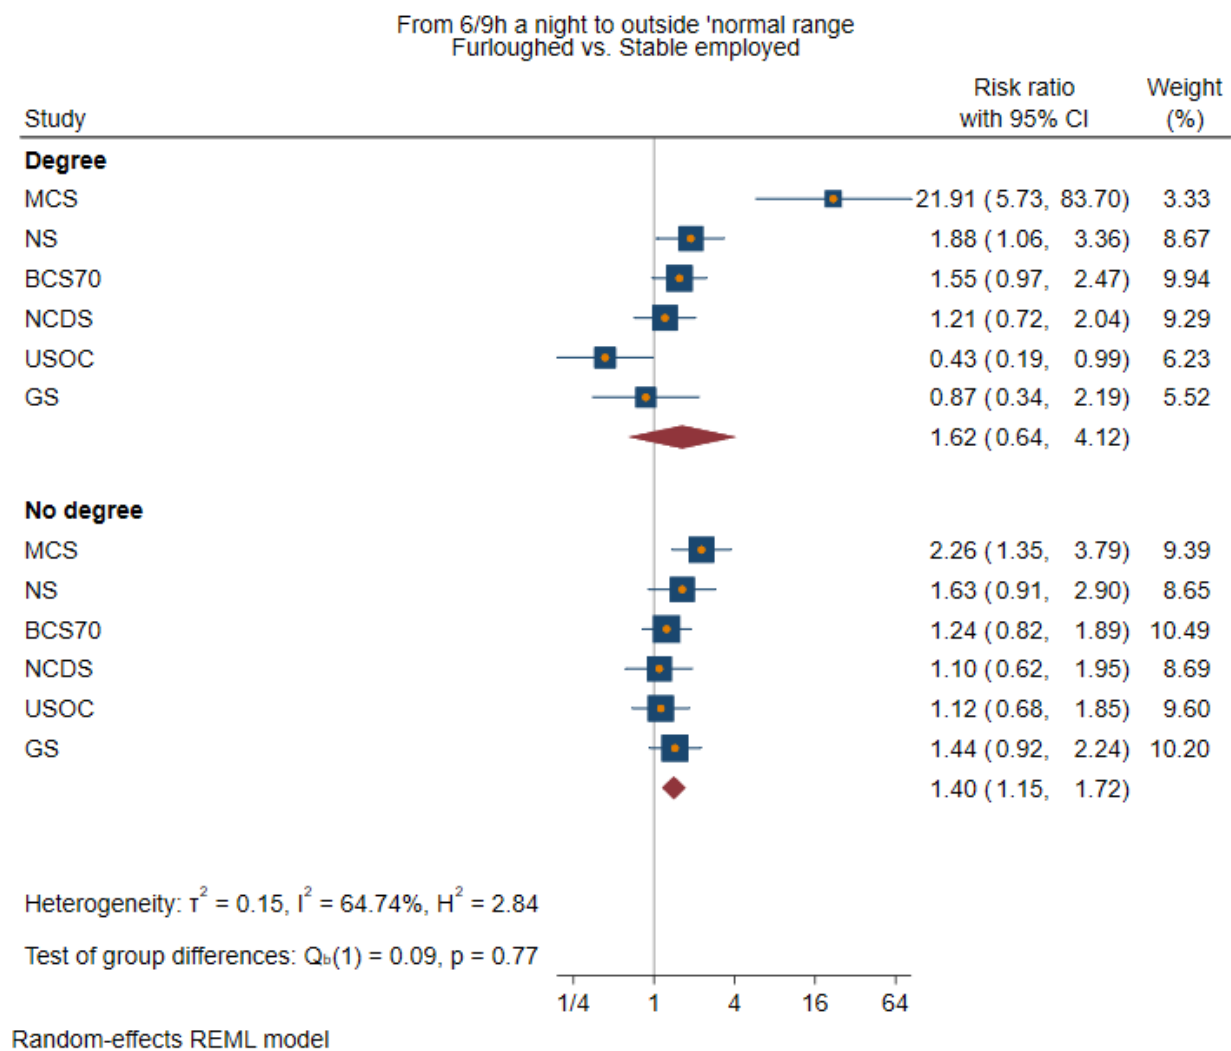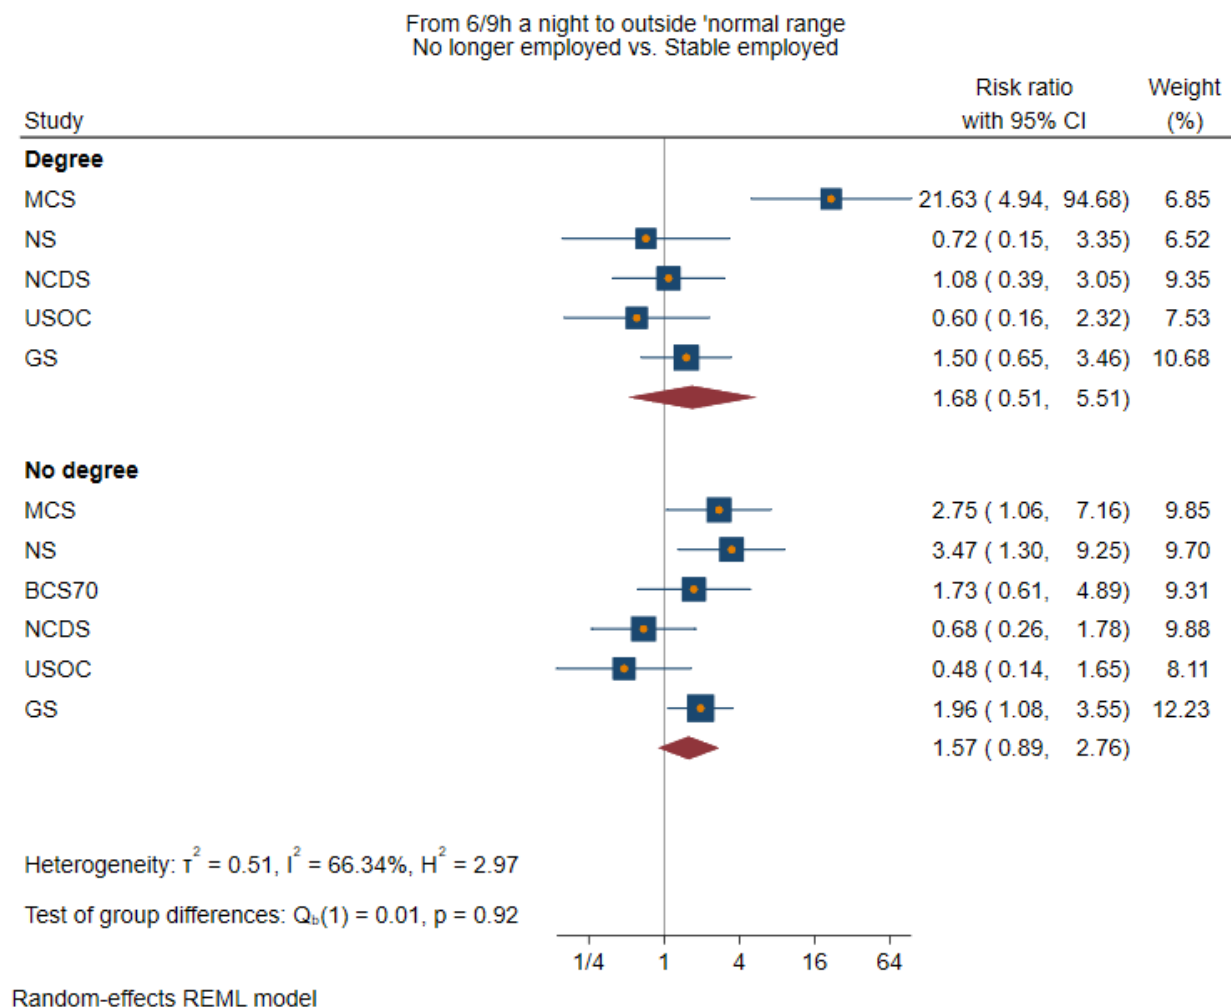



From 6/9h a night to outside 'normal range  
Stable unemployed vs. Stable employed

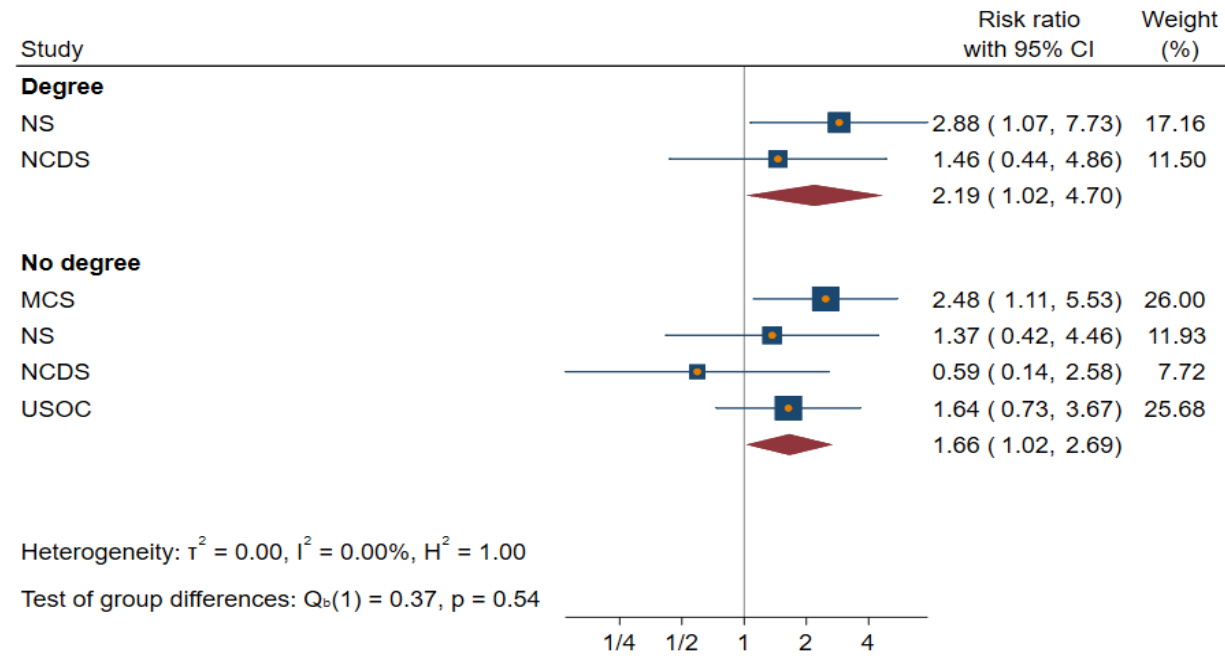

Random-effects REML model

From 6/9h a night to outside 'normal range  
Became employed vs. Stable employed

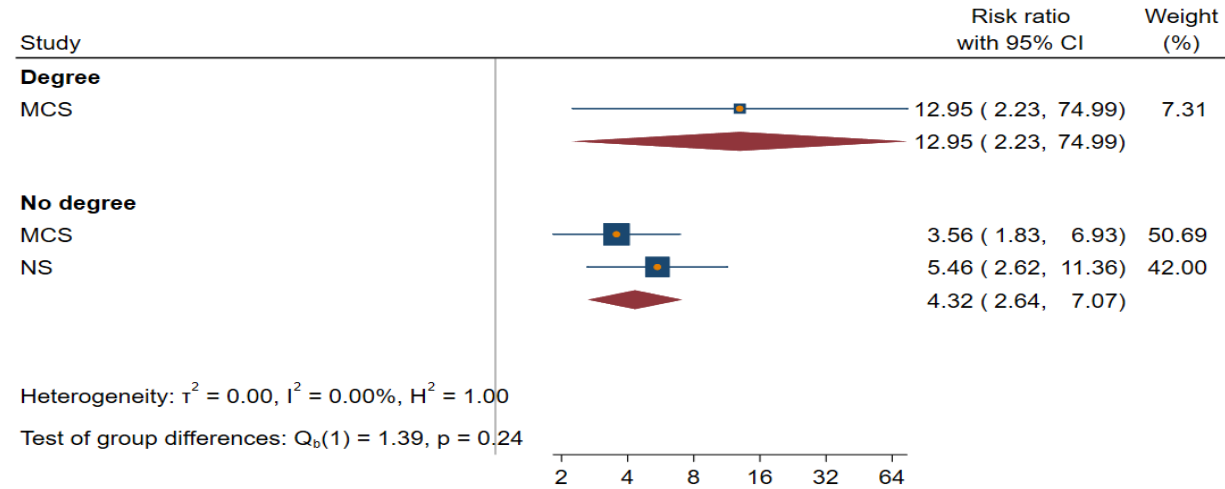

Random-effects REML model

From 6/9h a night to outside 'normal range  
Stable non-employed vs. Stable employed

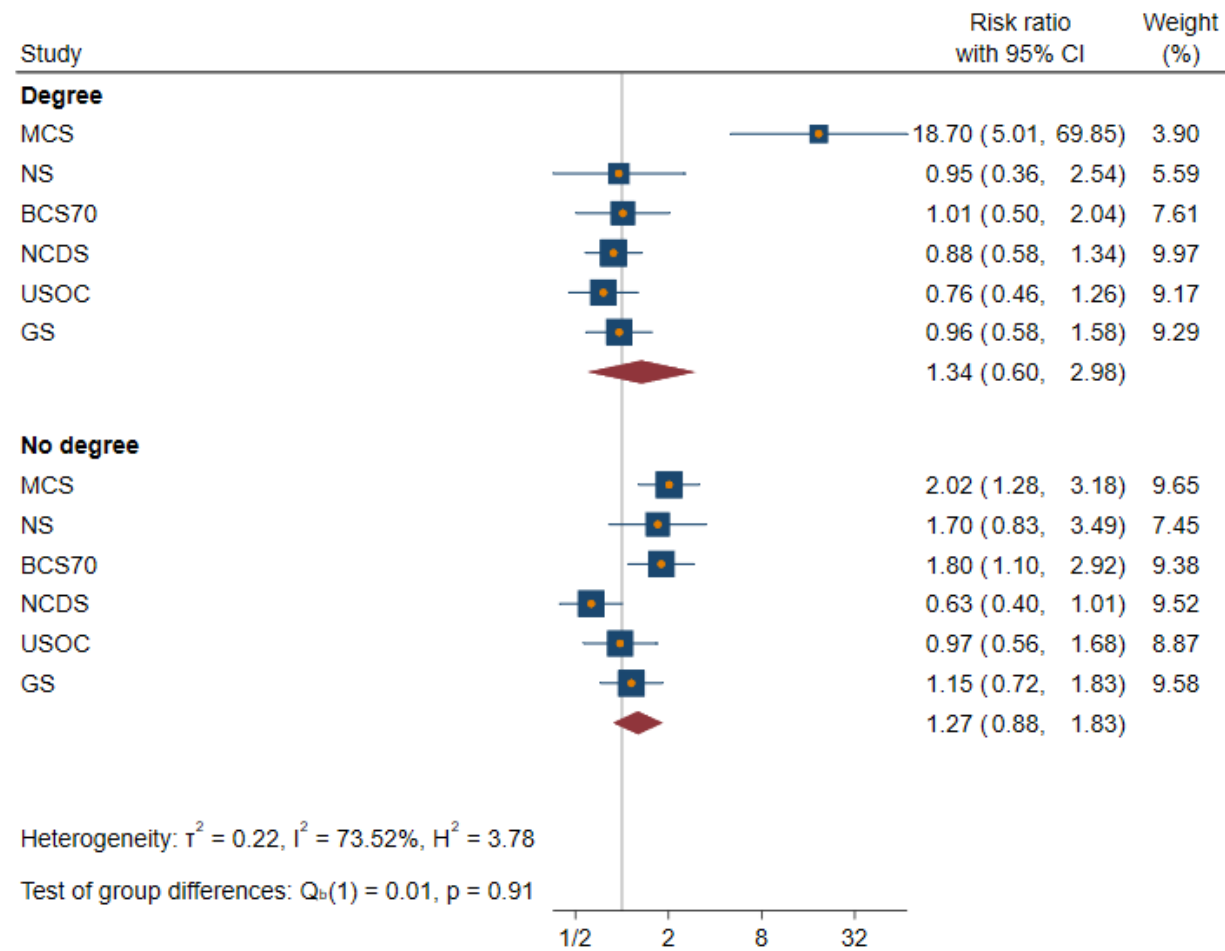

Random-effects REML model

Figure set 22: From ‘normal range’ to 6/9h a night

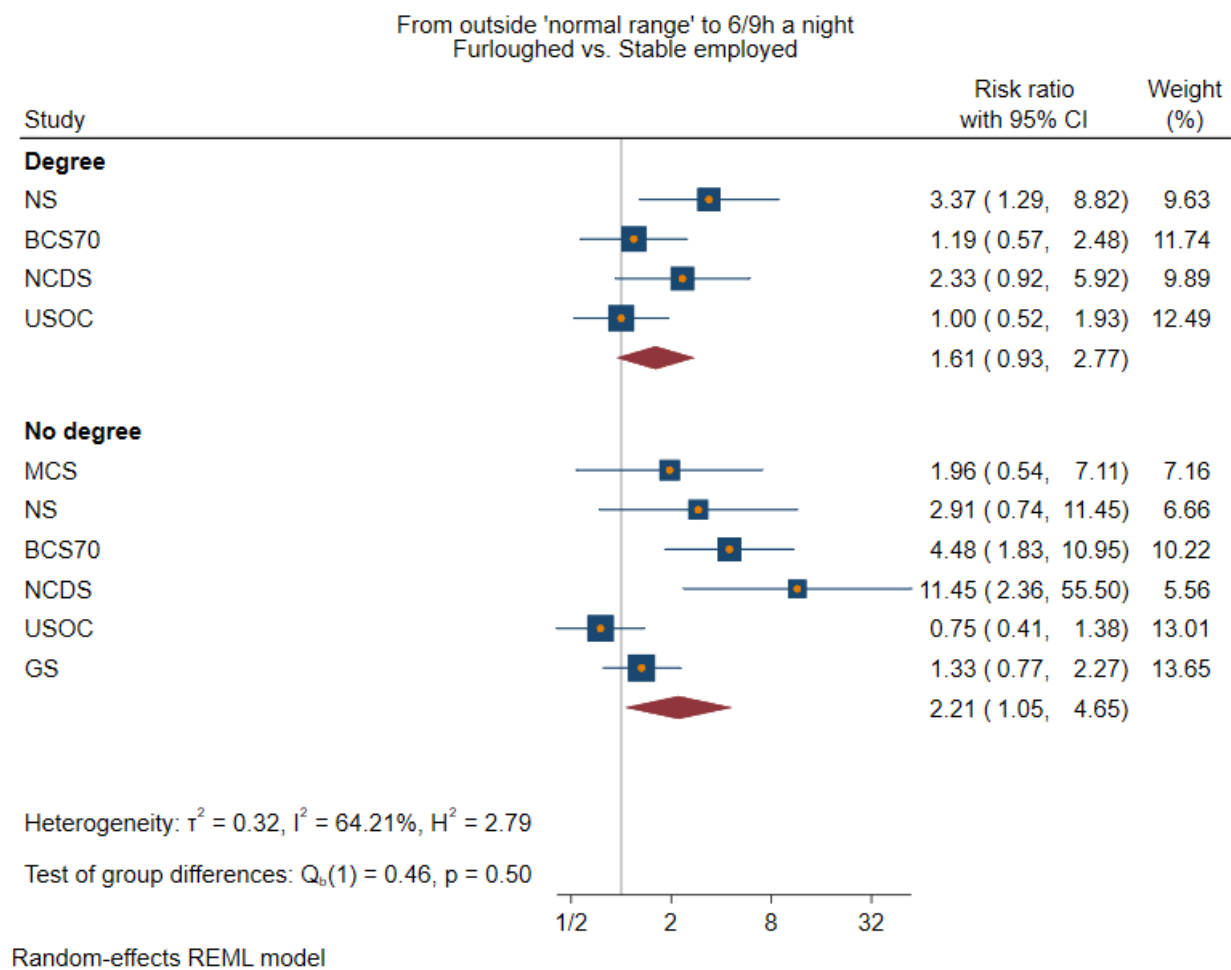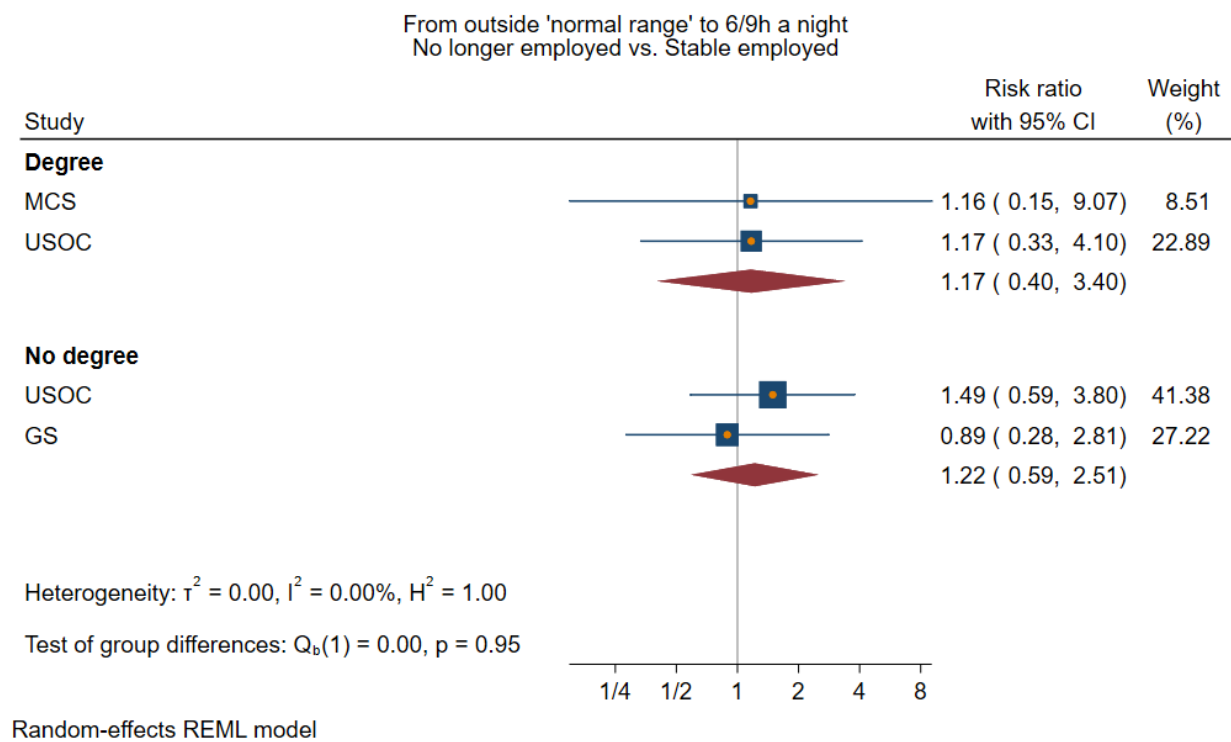

From outside 'normal range' to 6/9h a night  
Stable unemployed vs. Stable employed

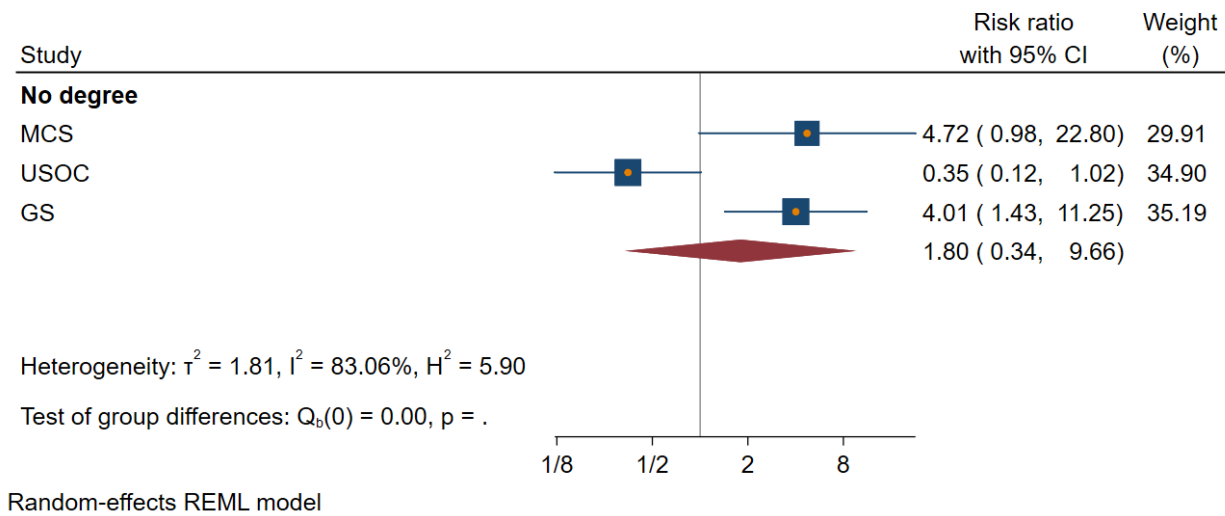

From outside 'normal range' to 6/9h a night  
Became employed vs. Stable employed

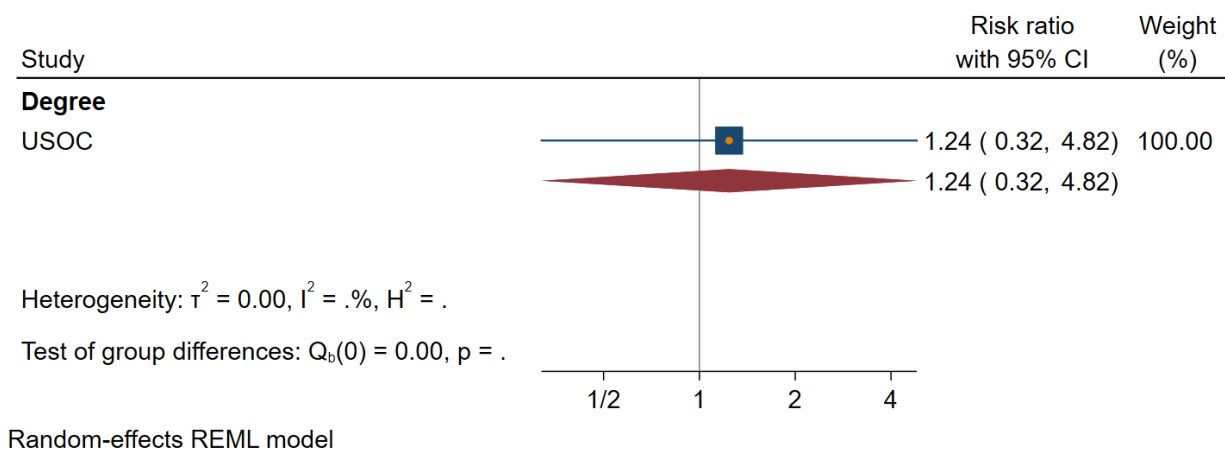

From outside 'normal range' to 6/9h a night  
Stable non-employed vs. Stable employed

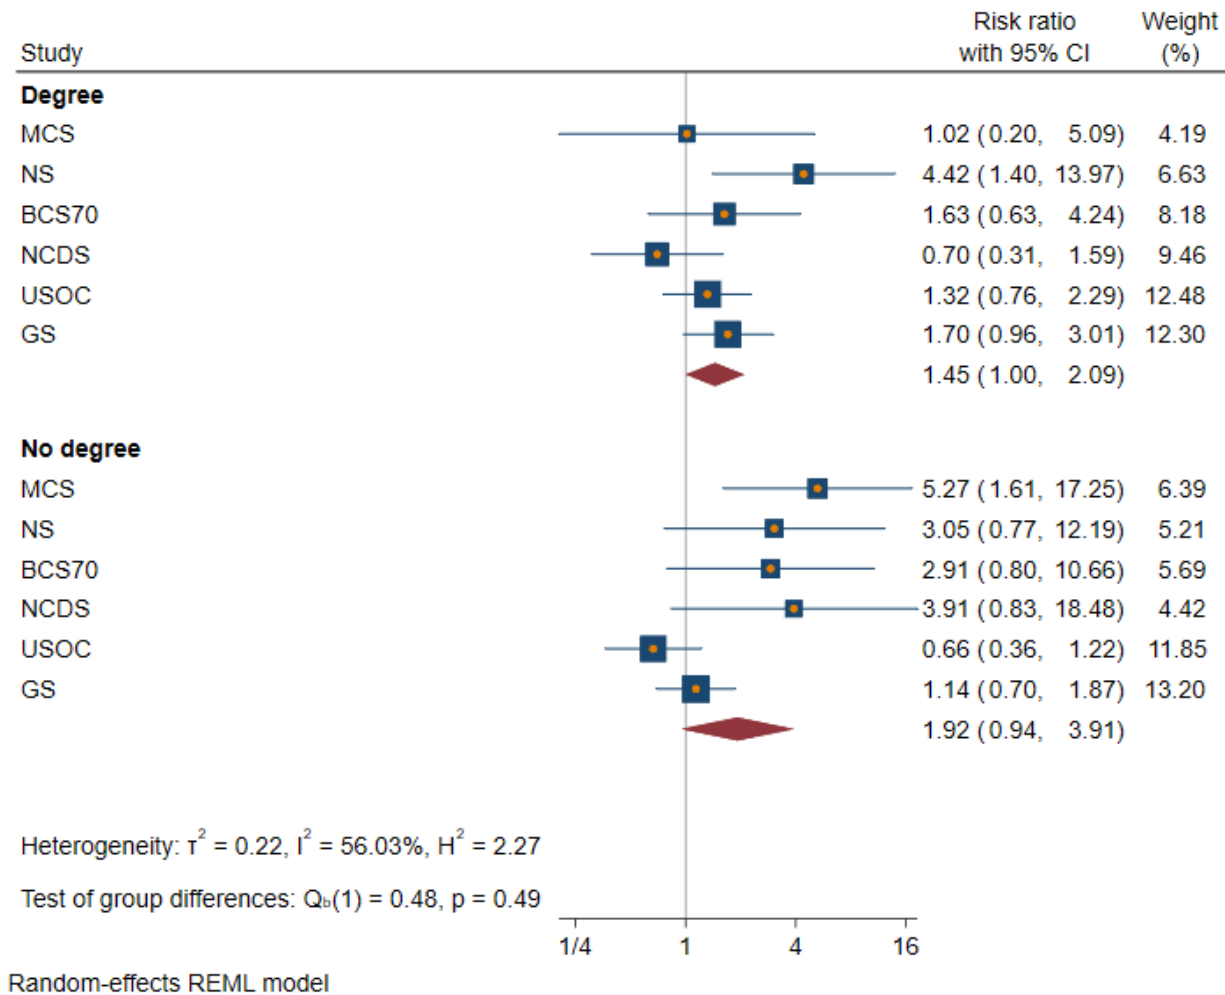

Figure set 23: Currently eats 2 or fewer fruit and veg

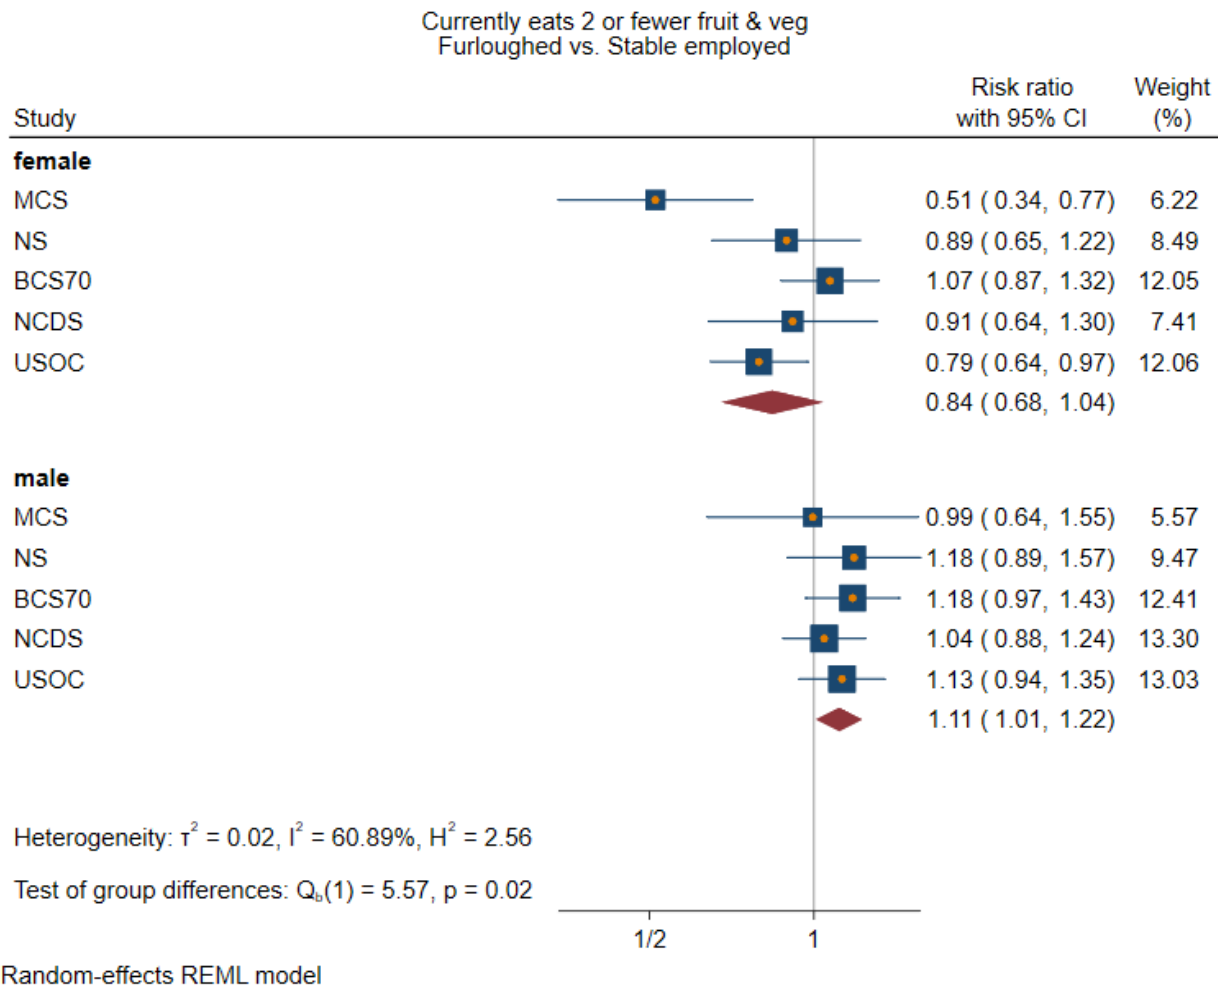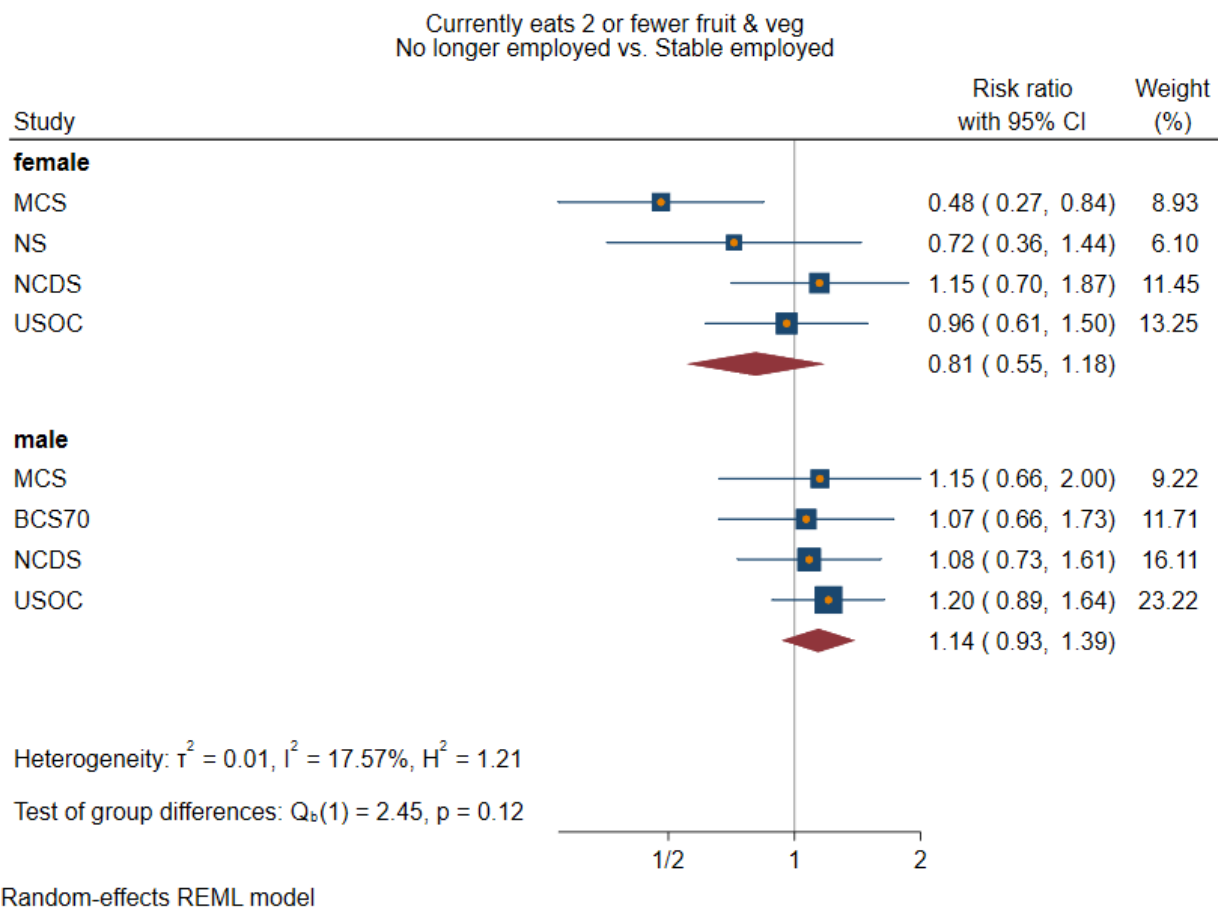

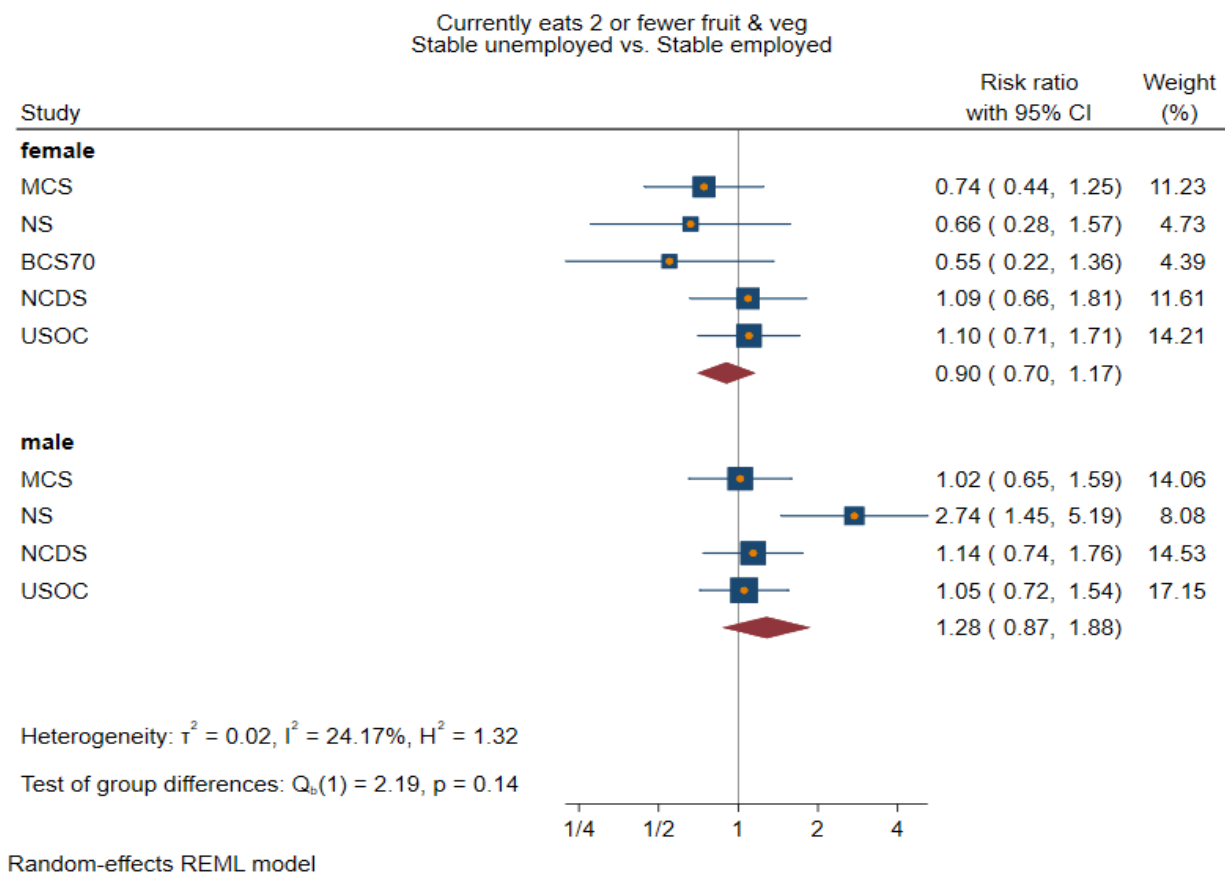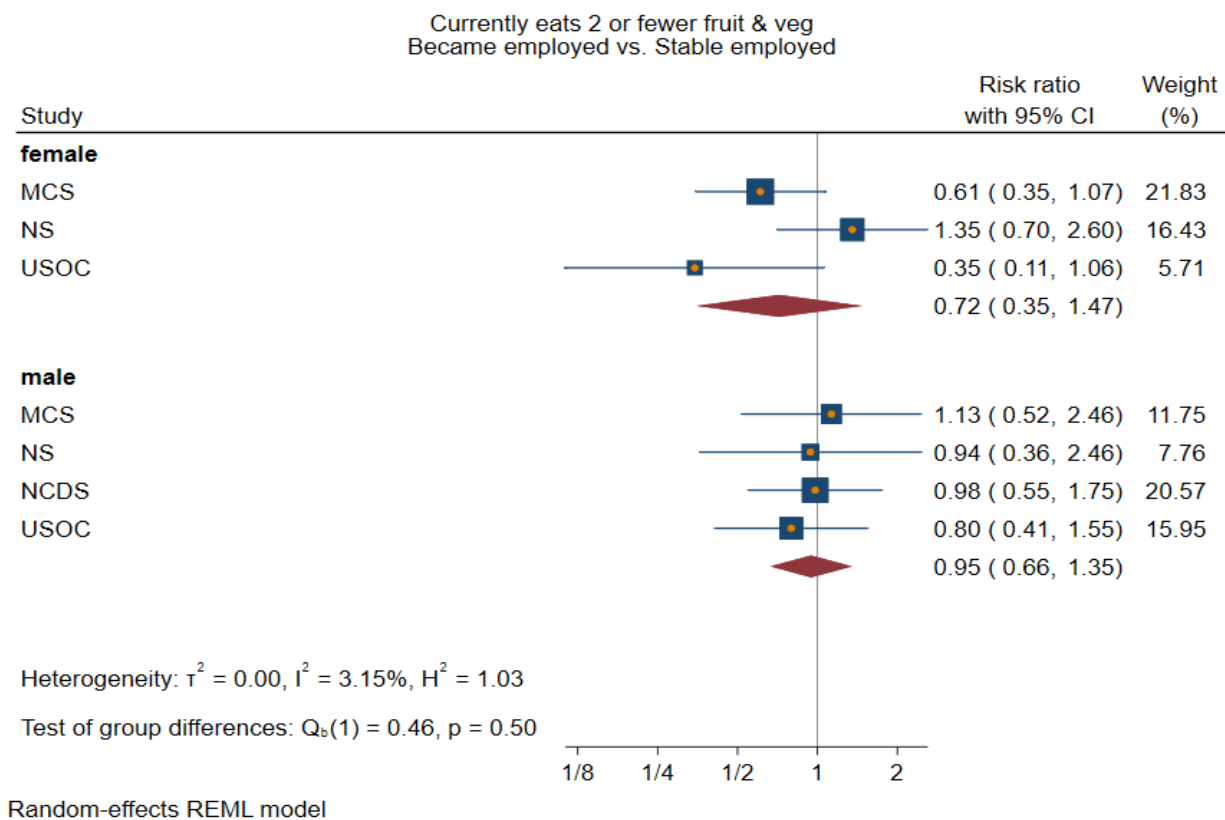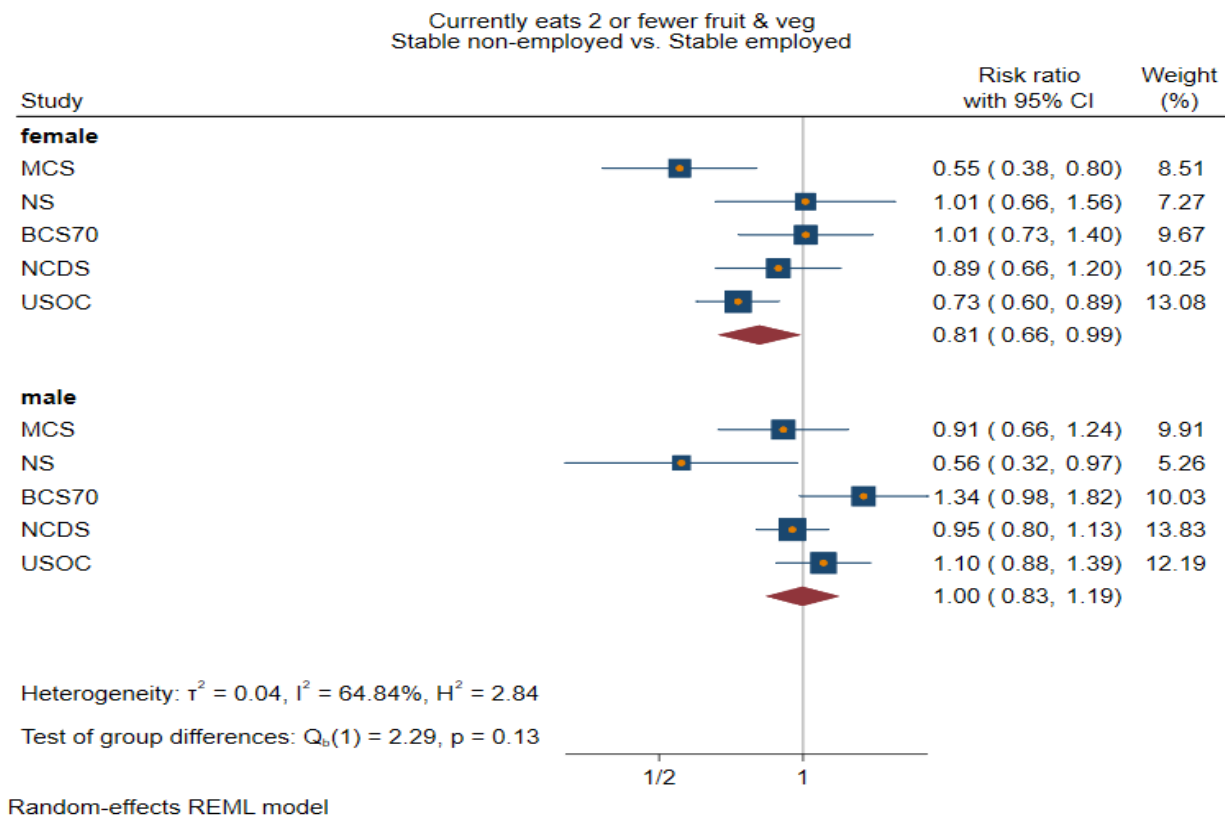

Figure set 24: Fewer fruit and veg

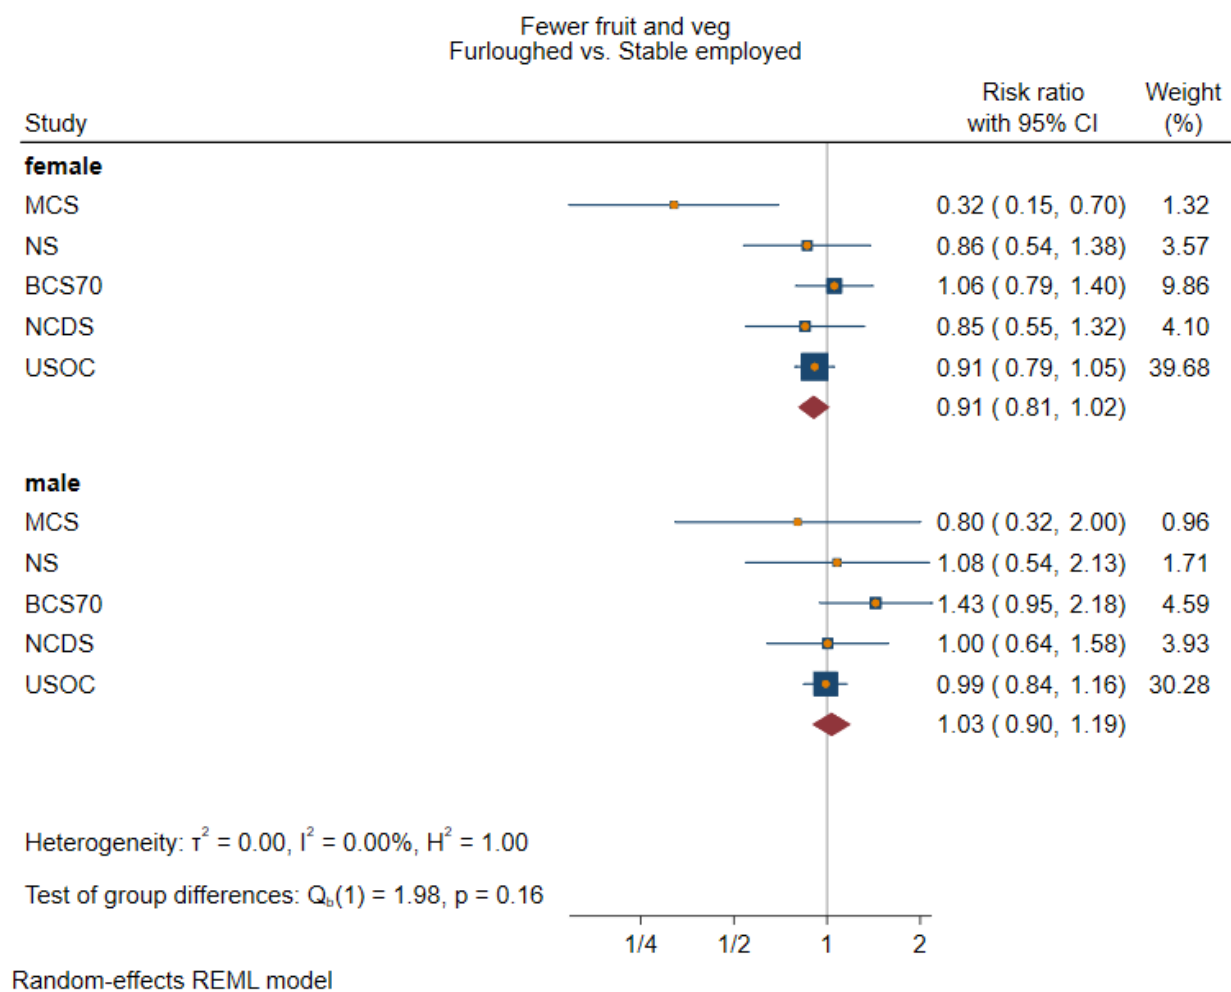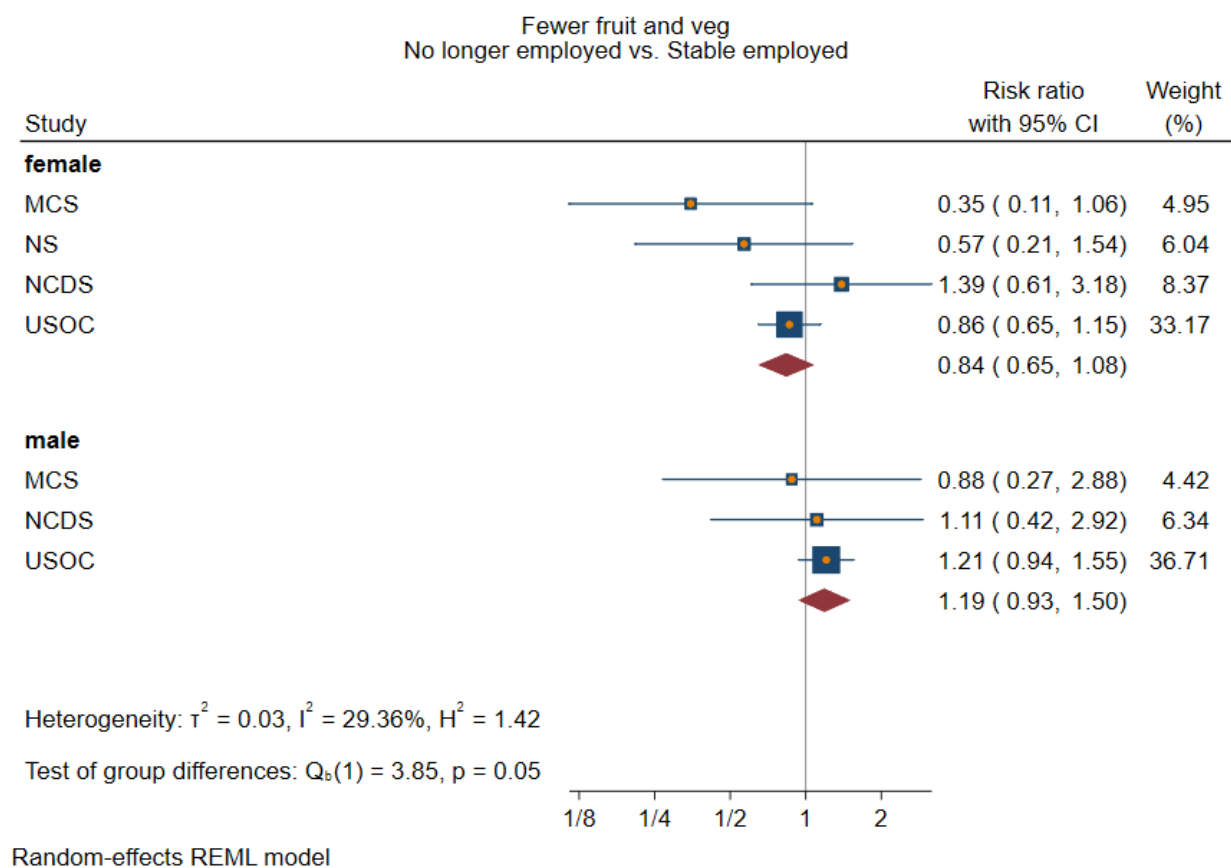

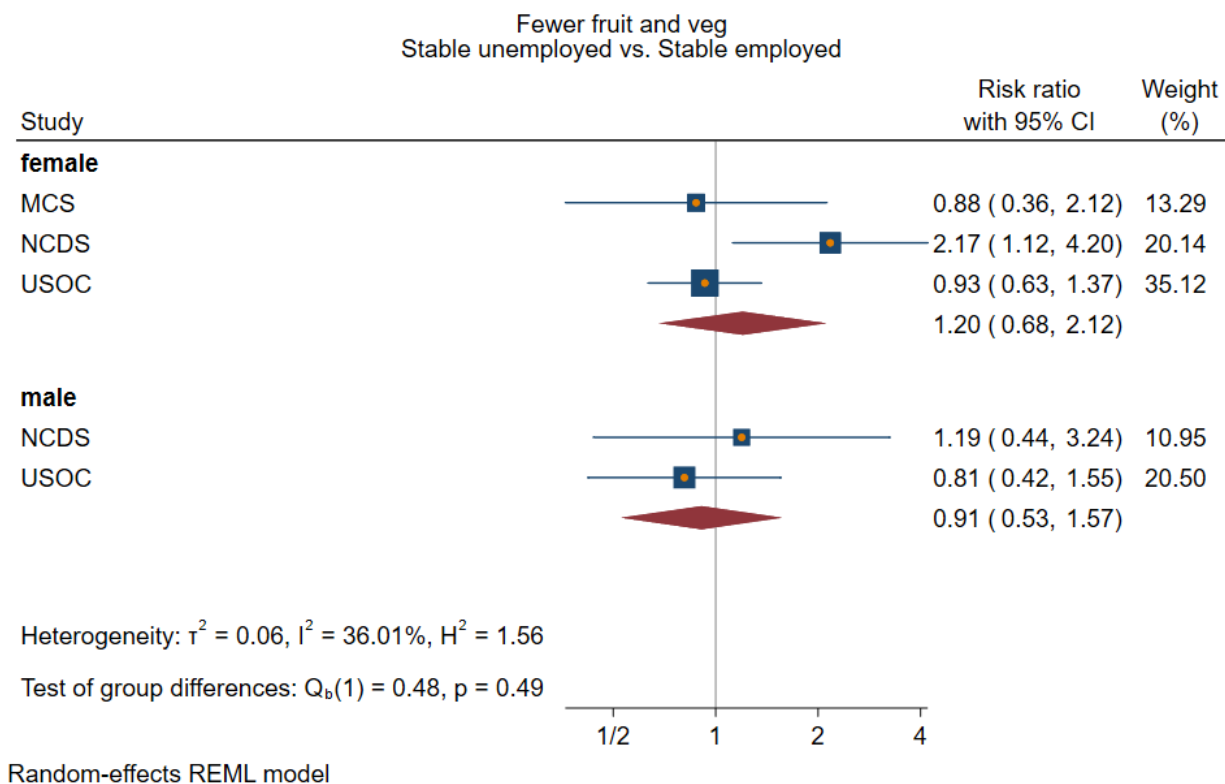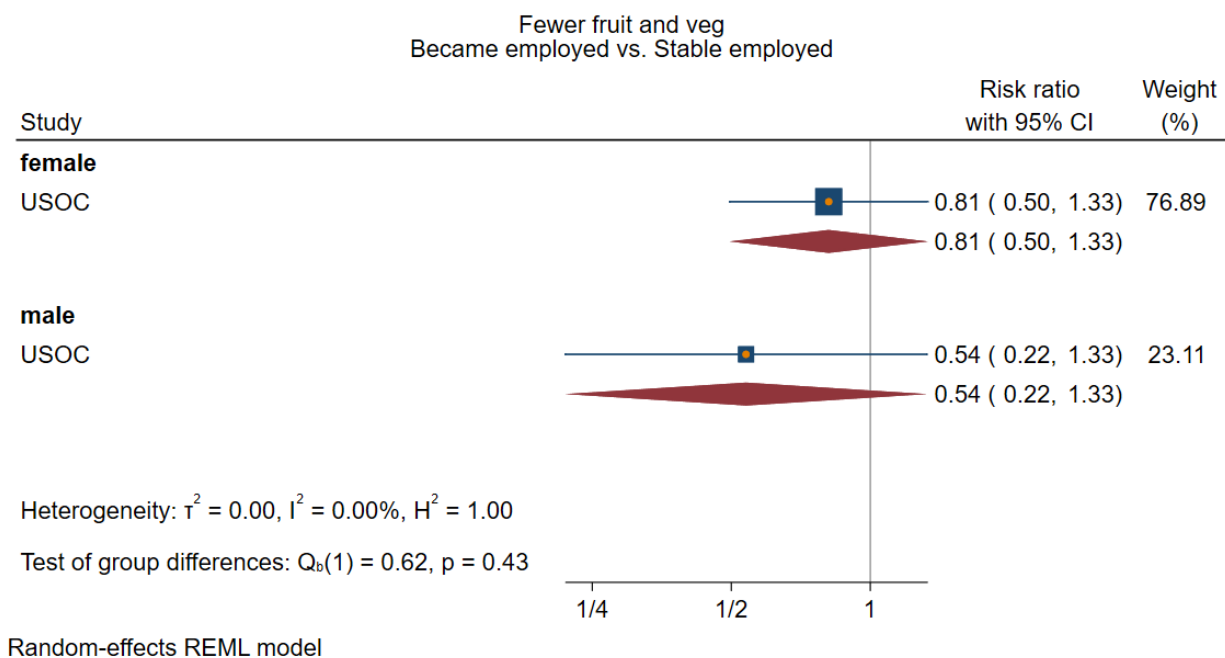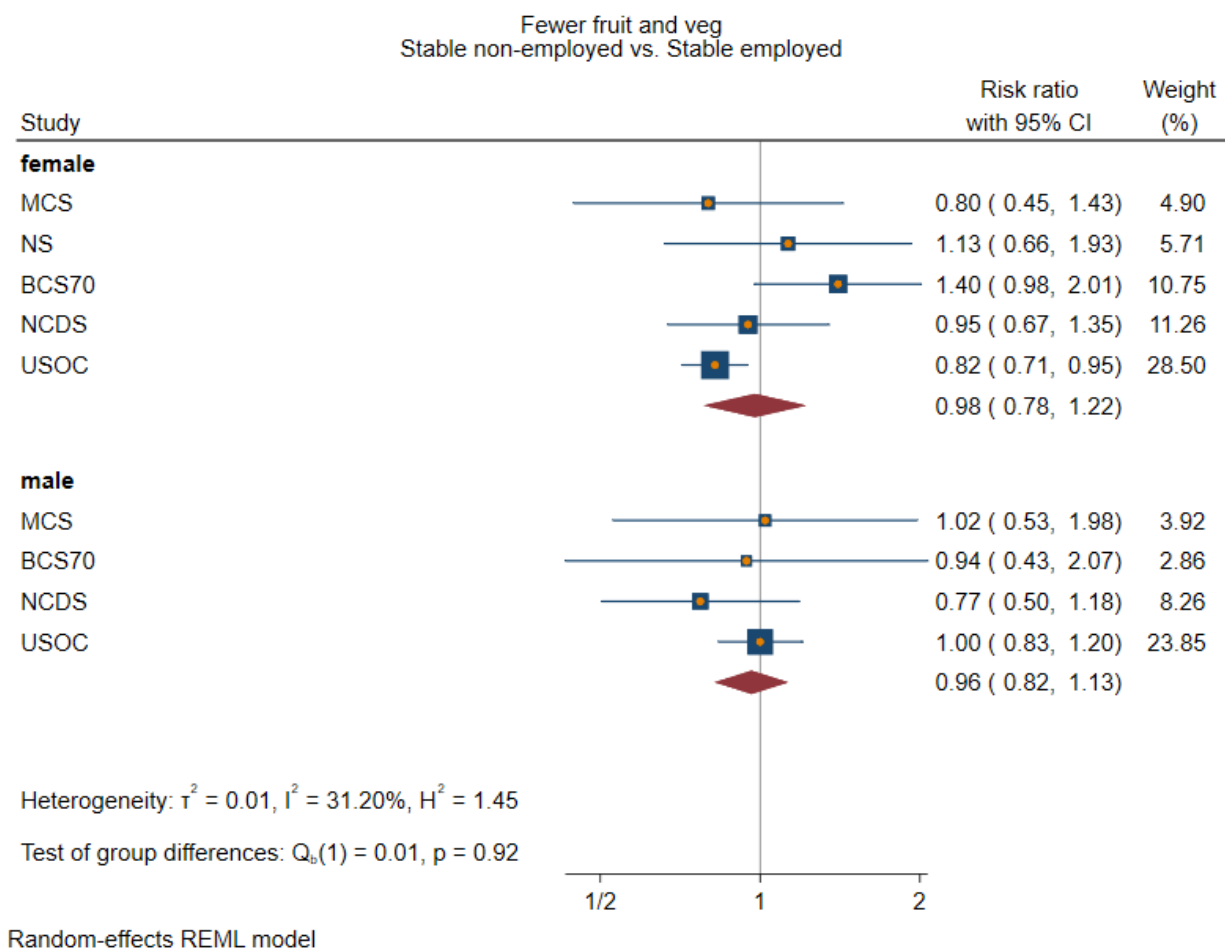

Figure set 25: More fruit and veg

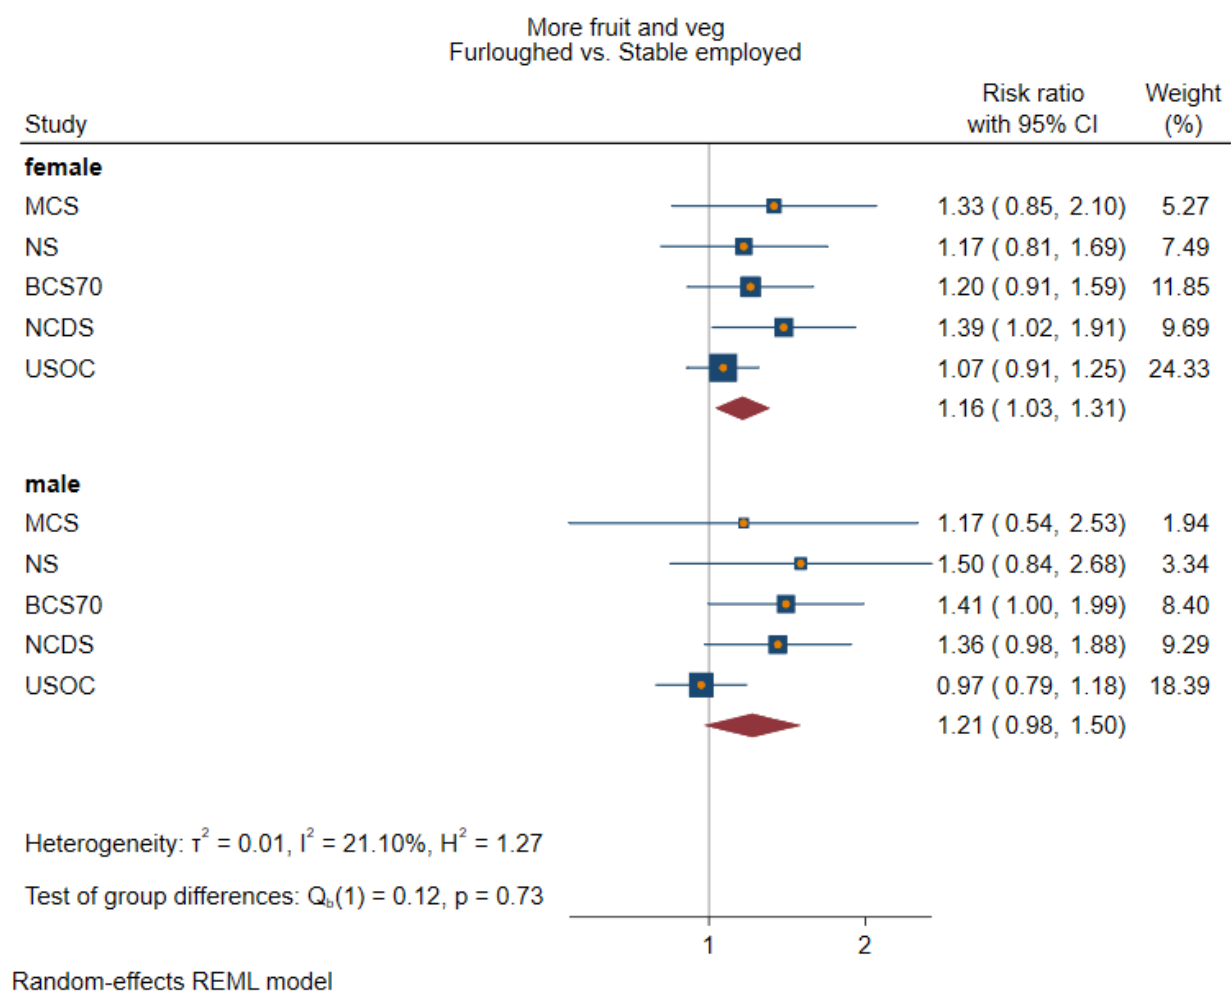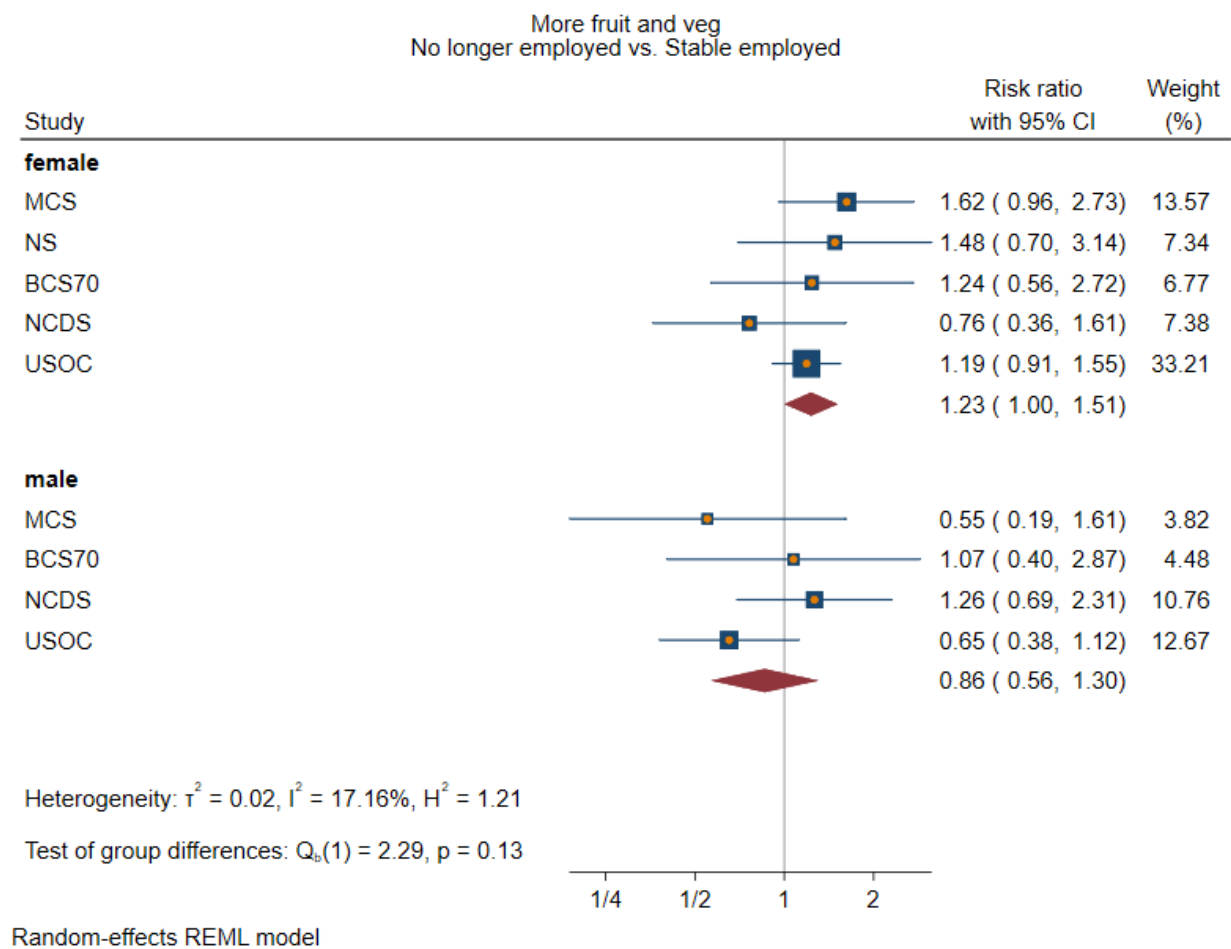



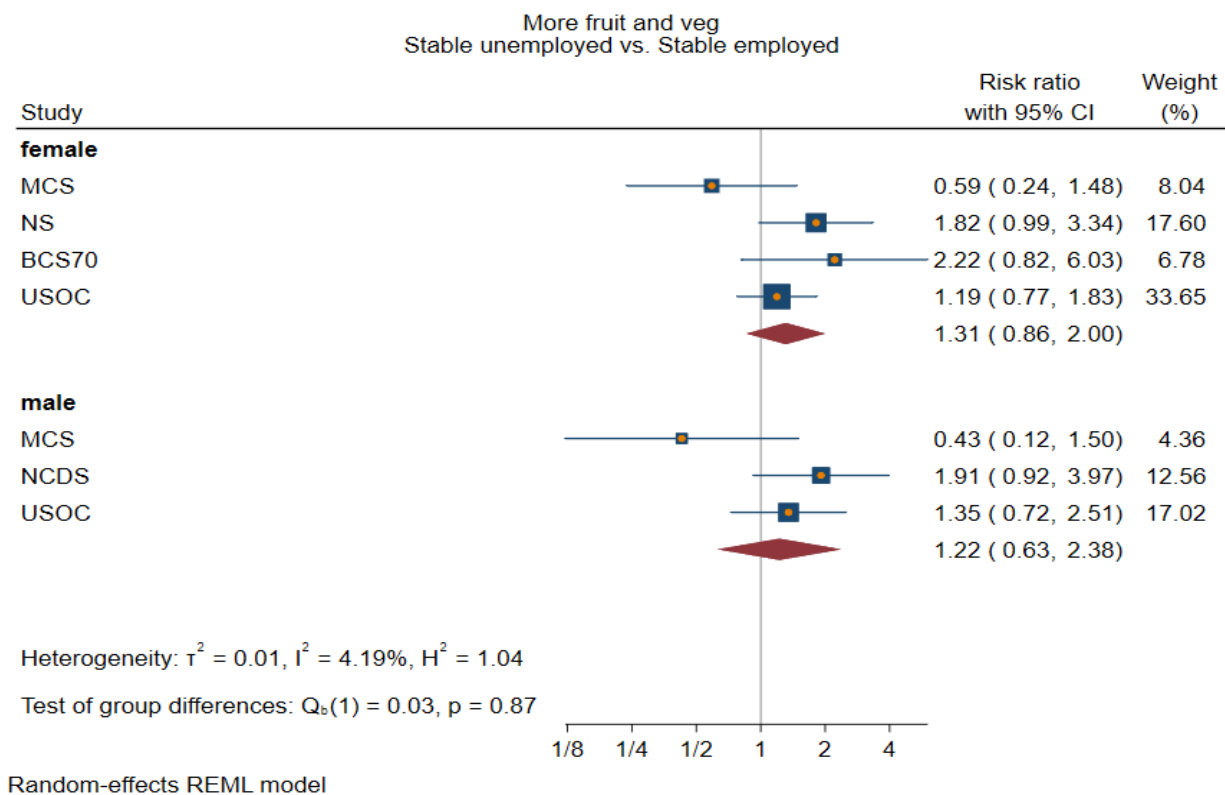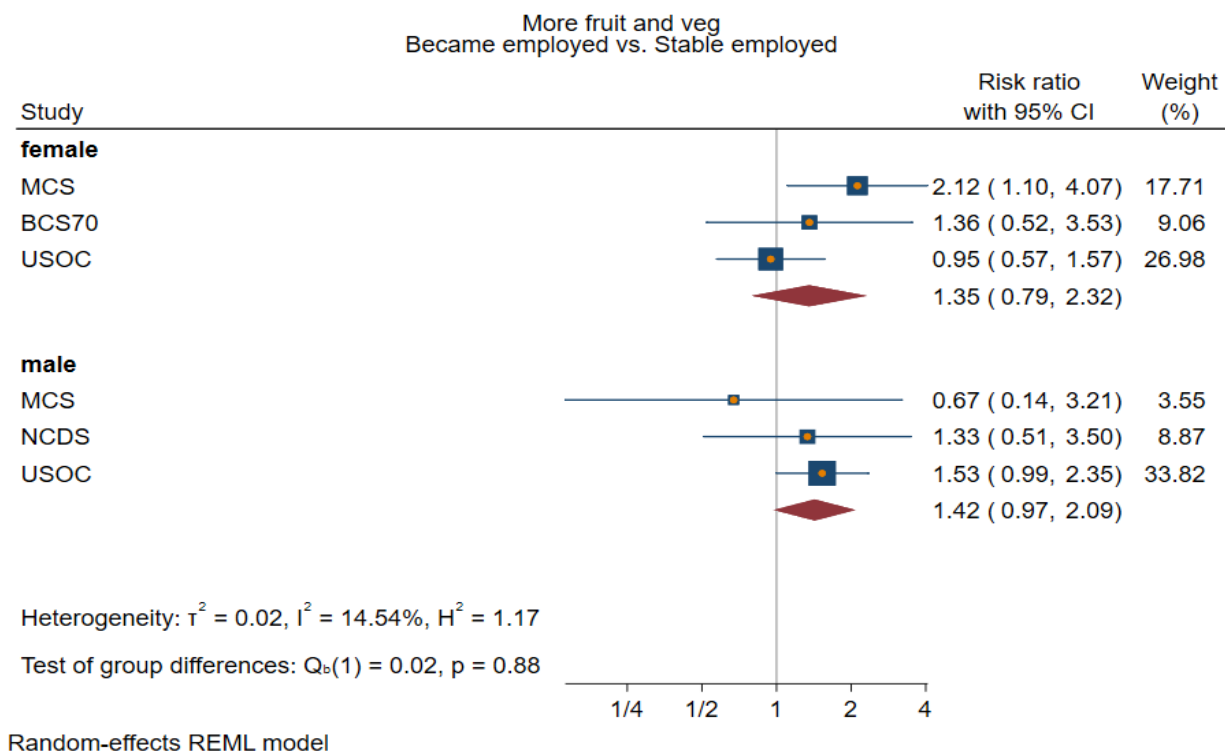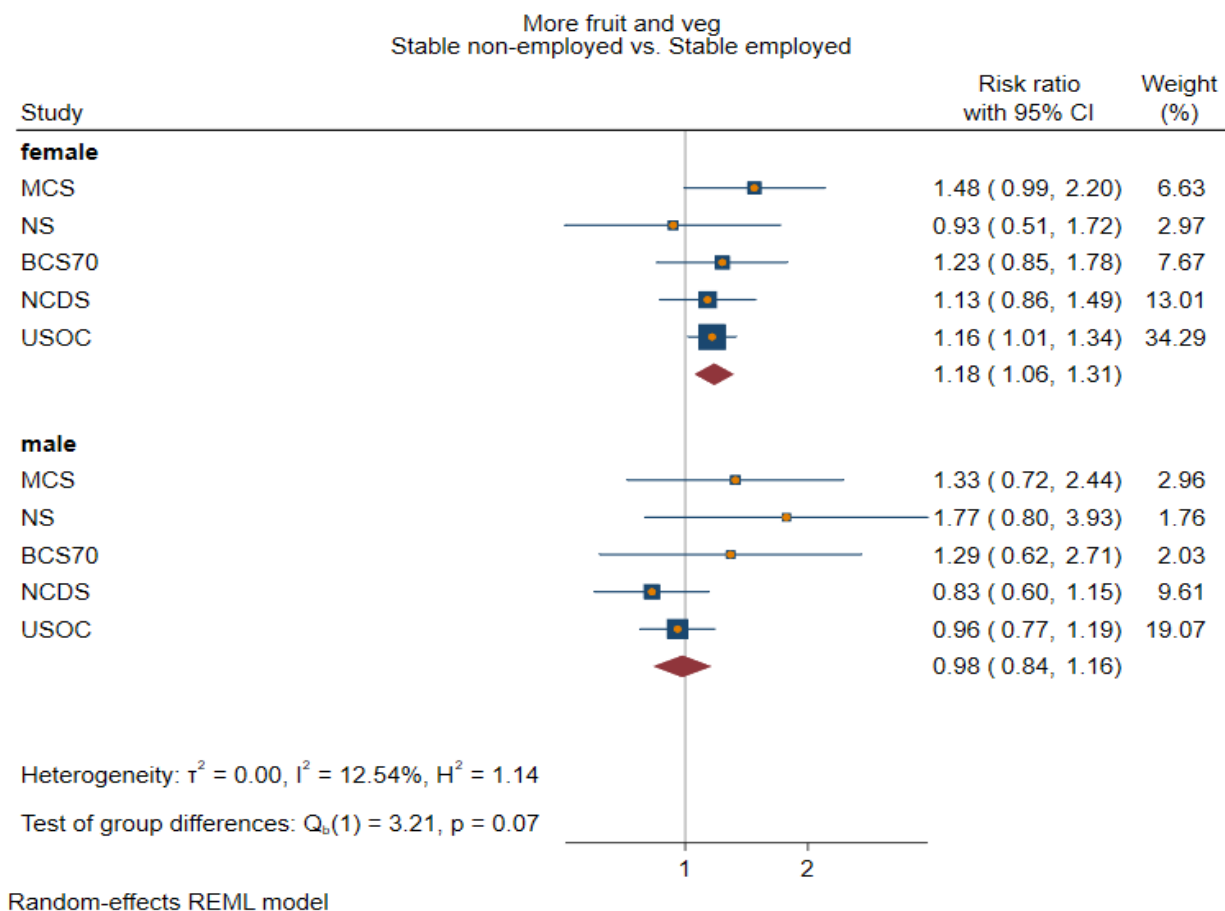

Figure set 26: Less than 3 days a week of at least 30min exercise

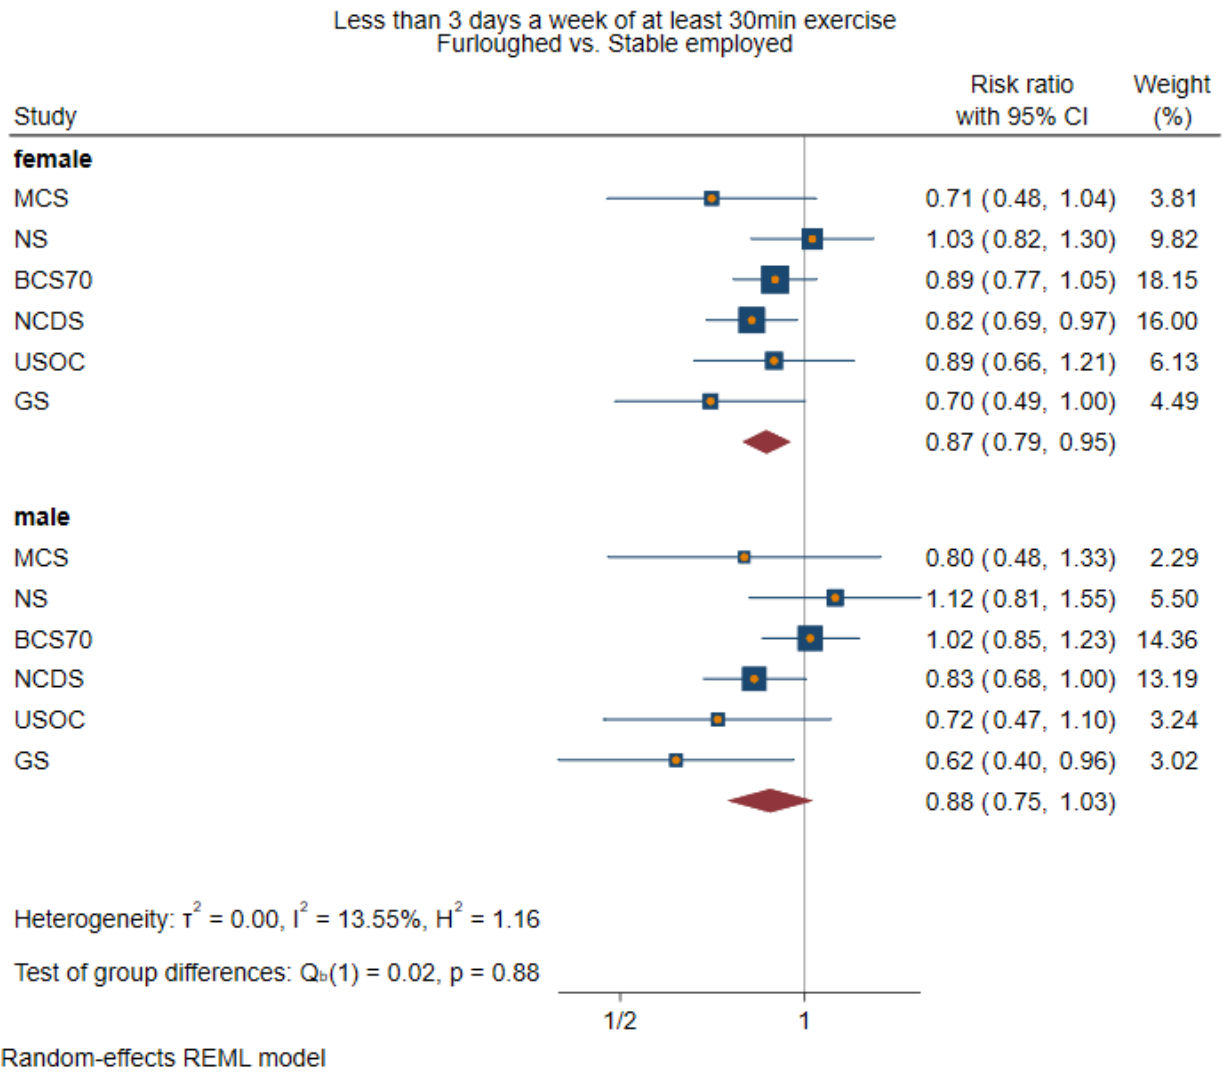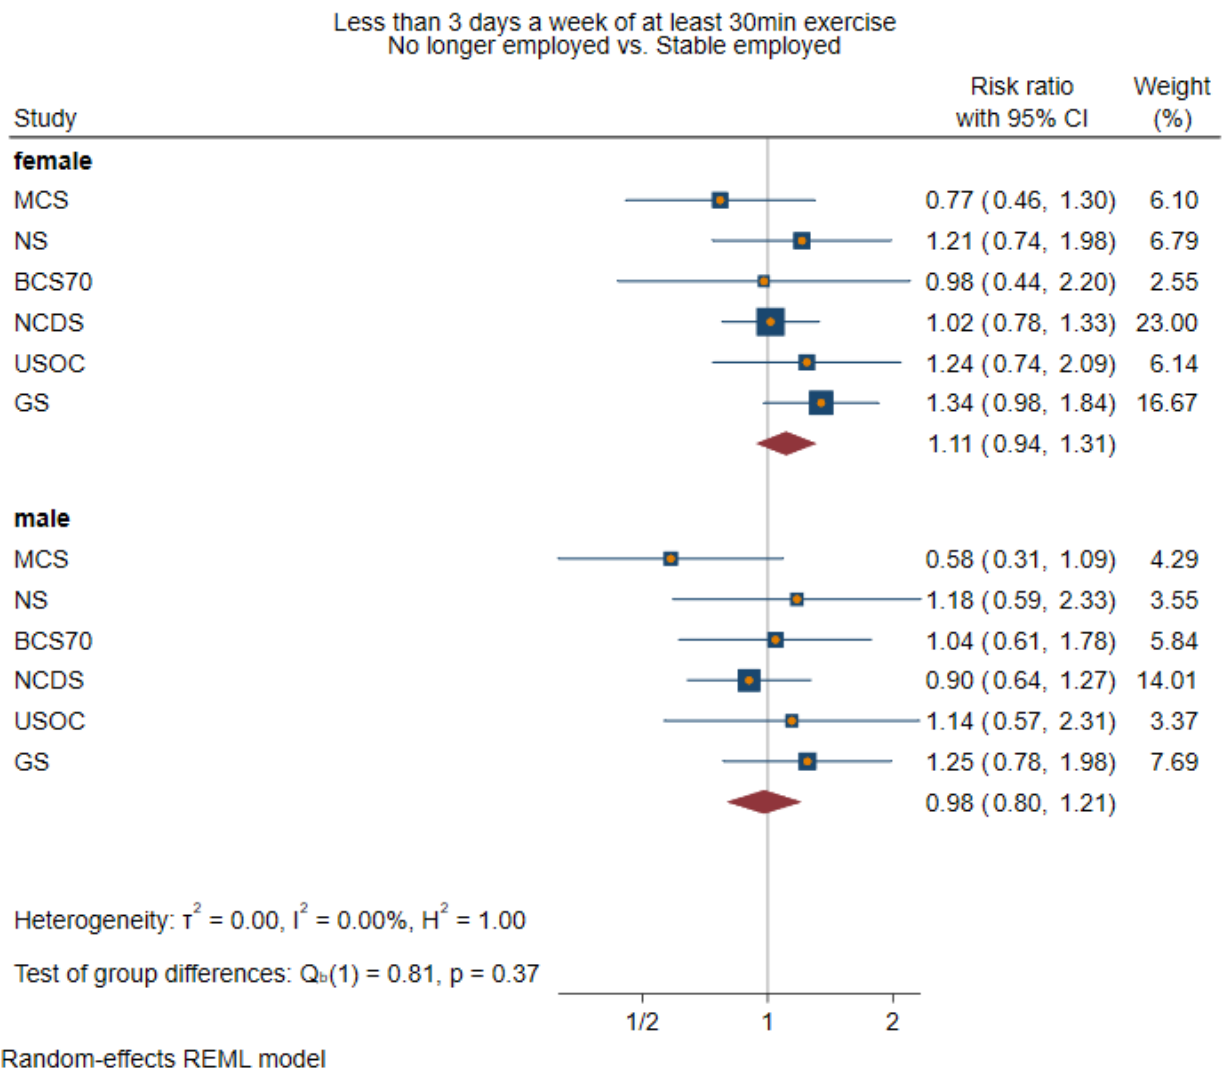

Less than 3 days a week of at least 30min exercise  
Stable unemployed vs. Stable employed

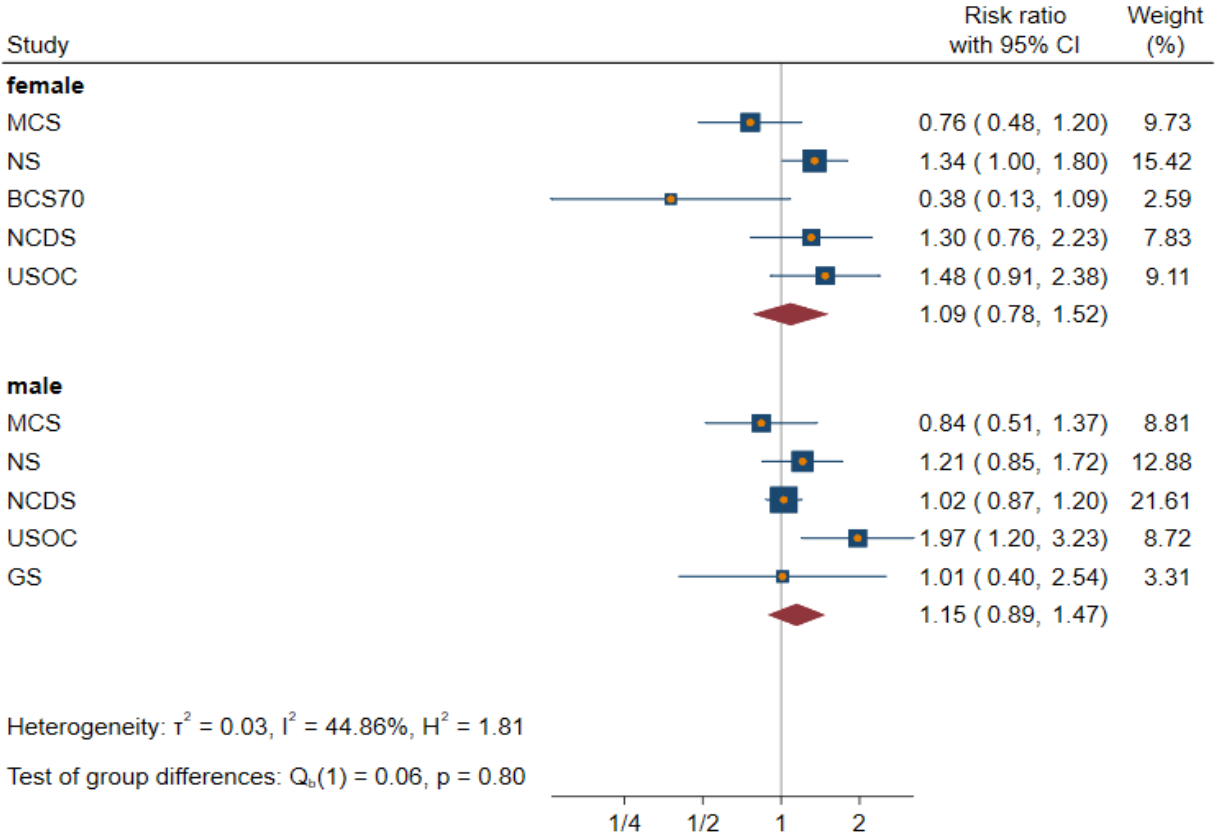

Random-effects REML model

Less than 3 days a week of at least 30min exercise  
Became employed vs. Stable employed

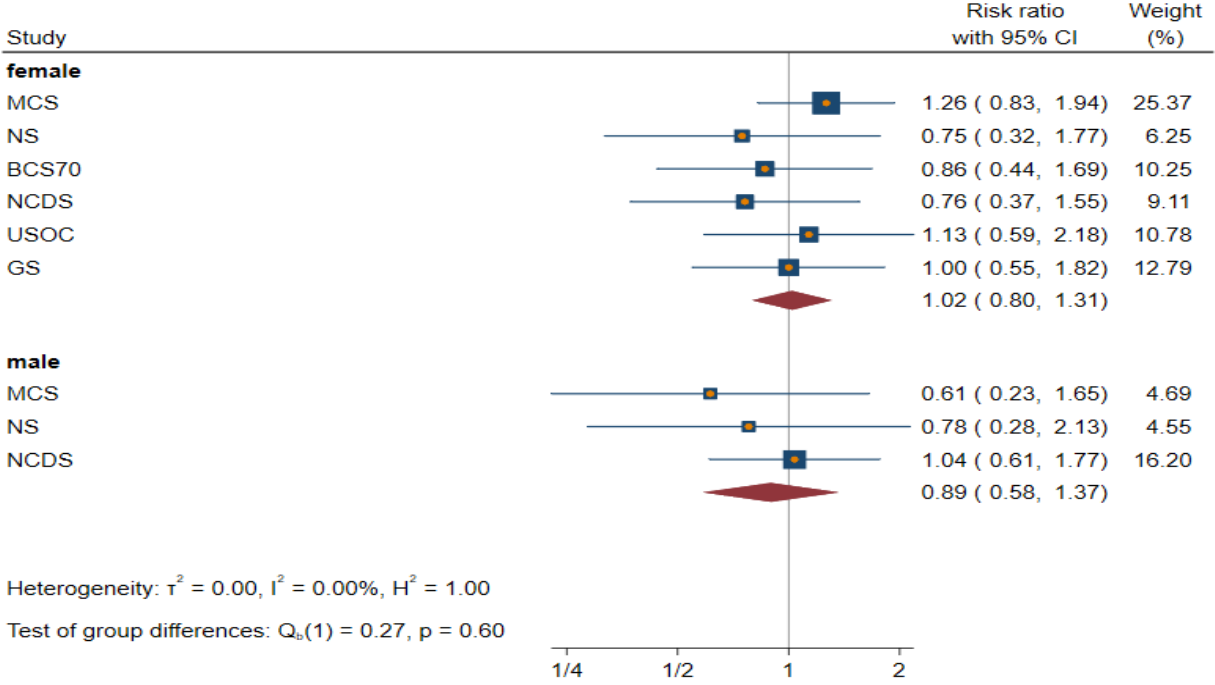

Random-effects REML model

Less than 3 days a week of at least 30min exercise  
Stable non-employed vs. Stable employed

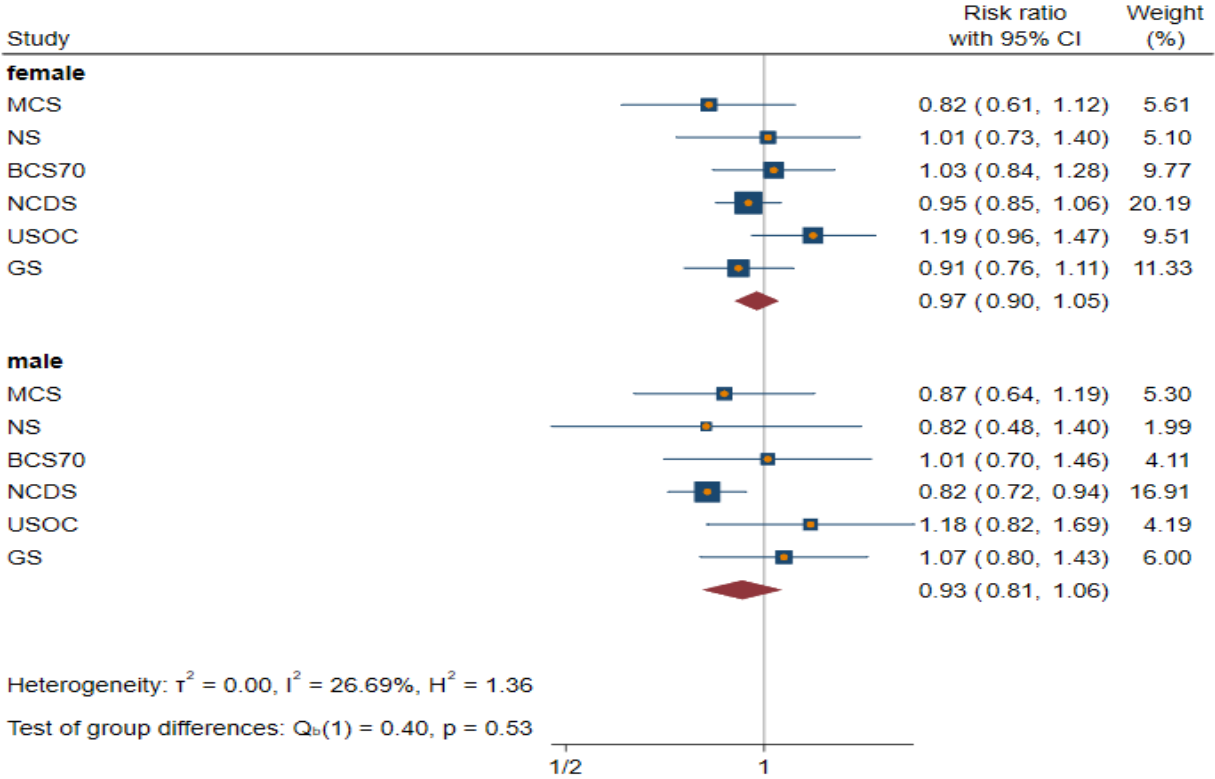

Random-effects REML model

Figure set 27: Less time/fewer days of physical exercise

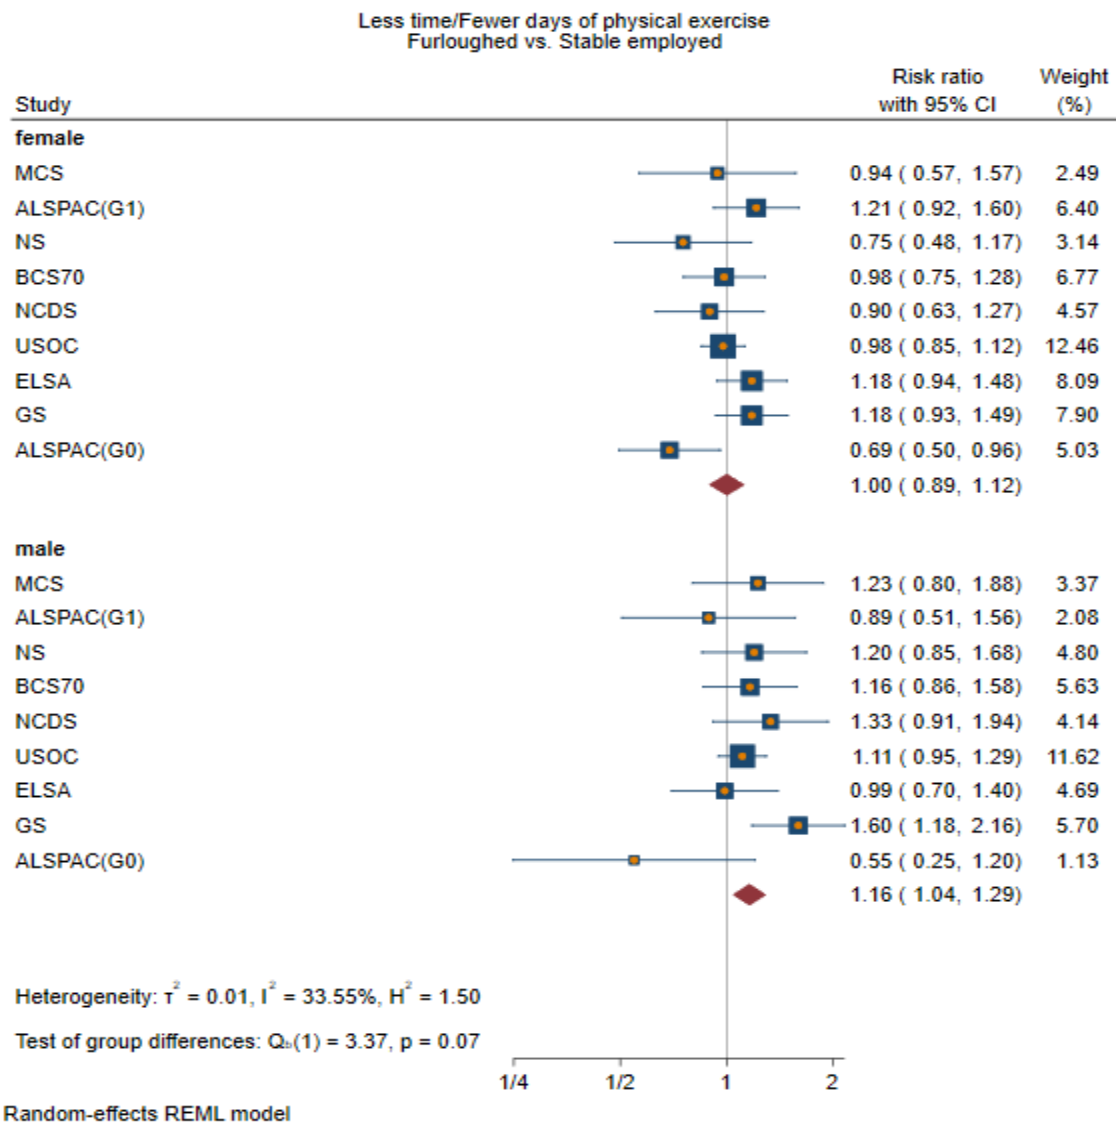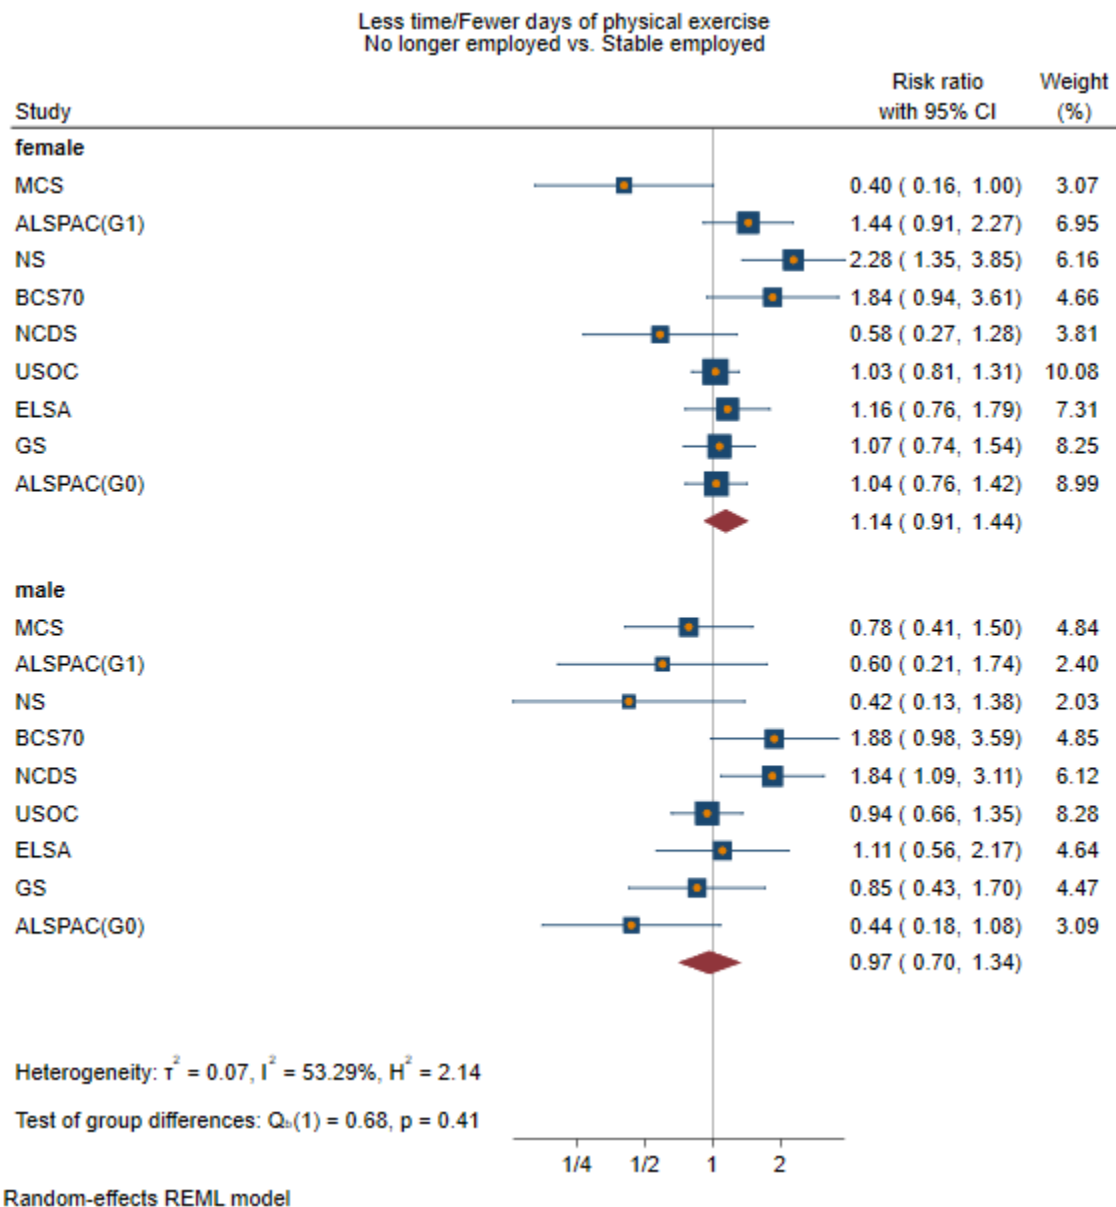

Less time/Fewer days of physical exercise  
Stable unemployed vs. Stable employed

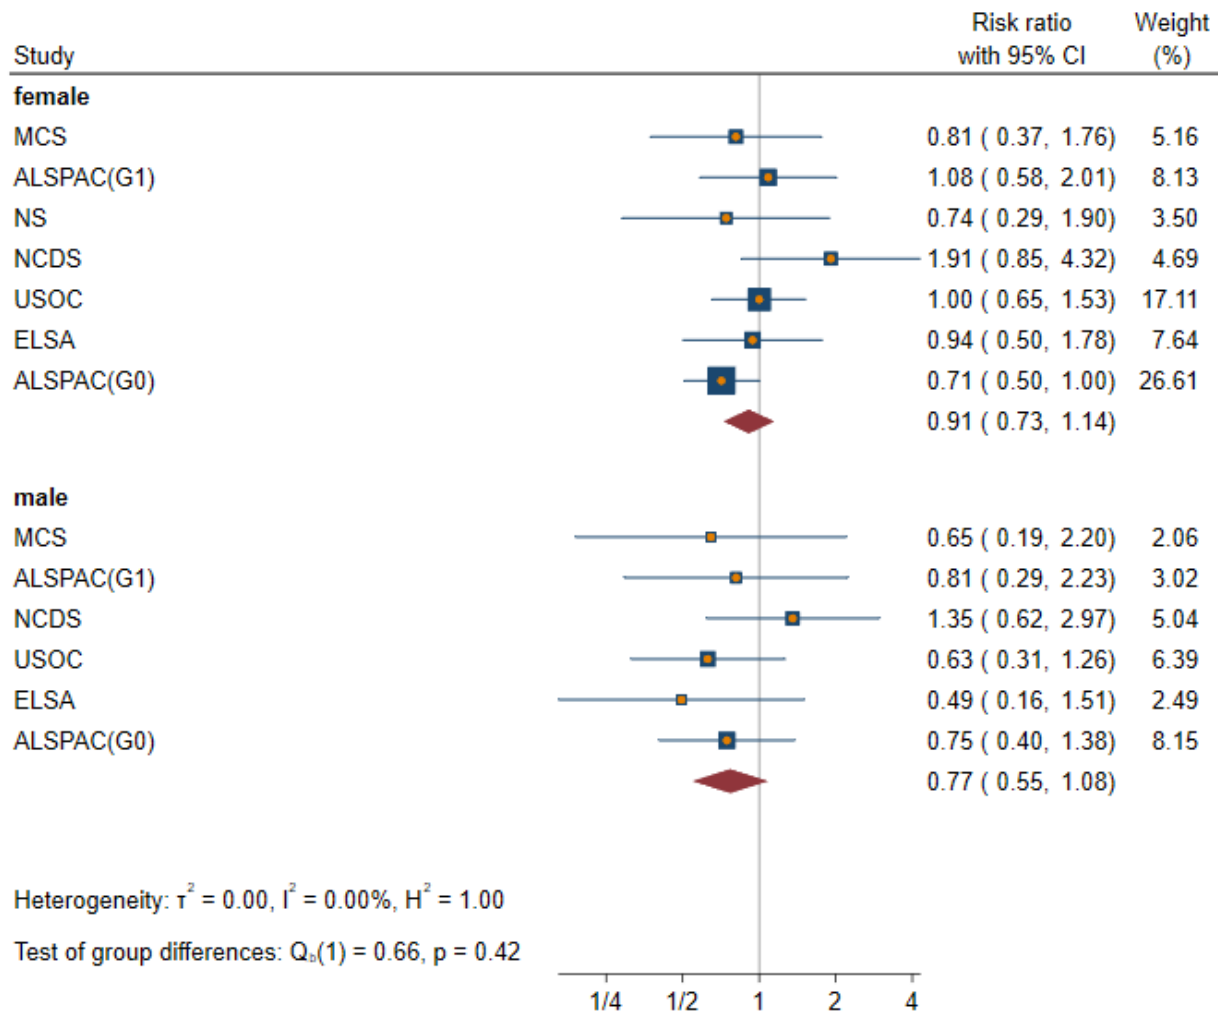

Random-effects REML model

Less time/Fewer days of physical exercise  
Became employed vs. Stable employed

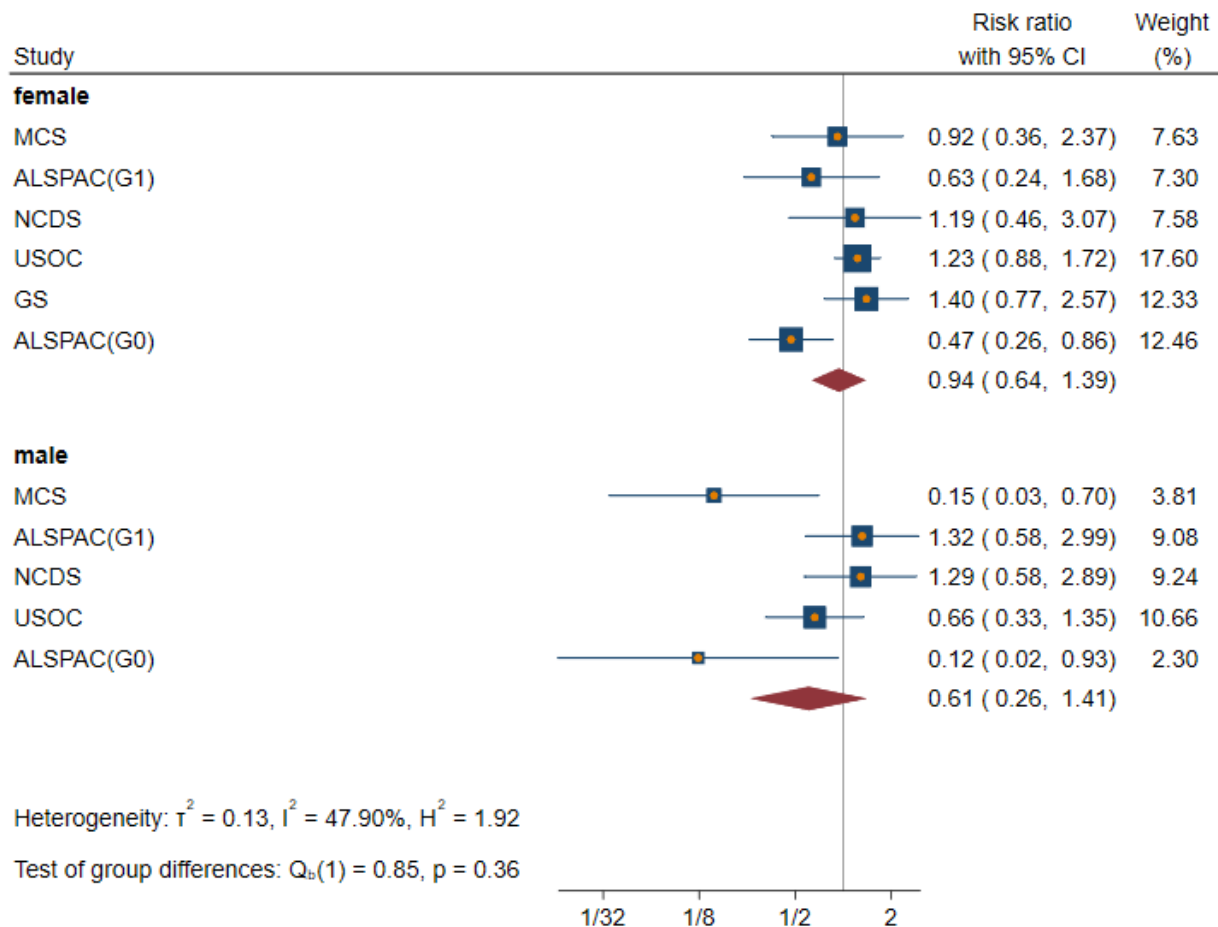

Random-effects REML model

Less time/Fewer days of physical exercise  
Stable non-employed vs. Stable employed

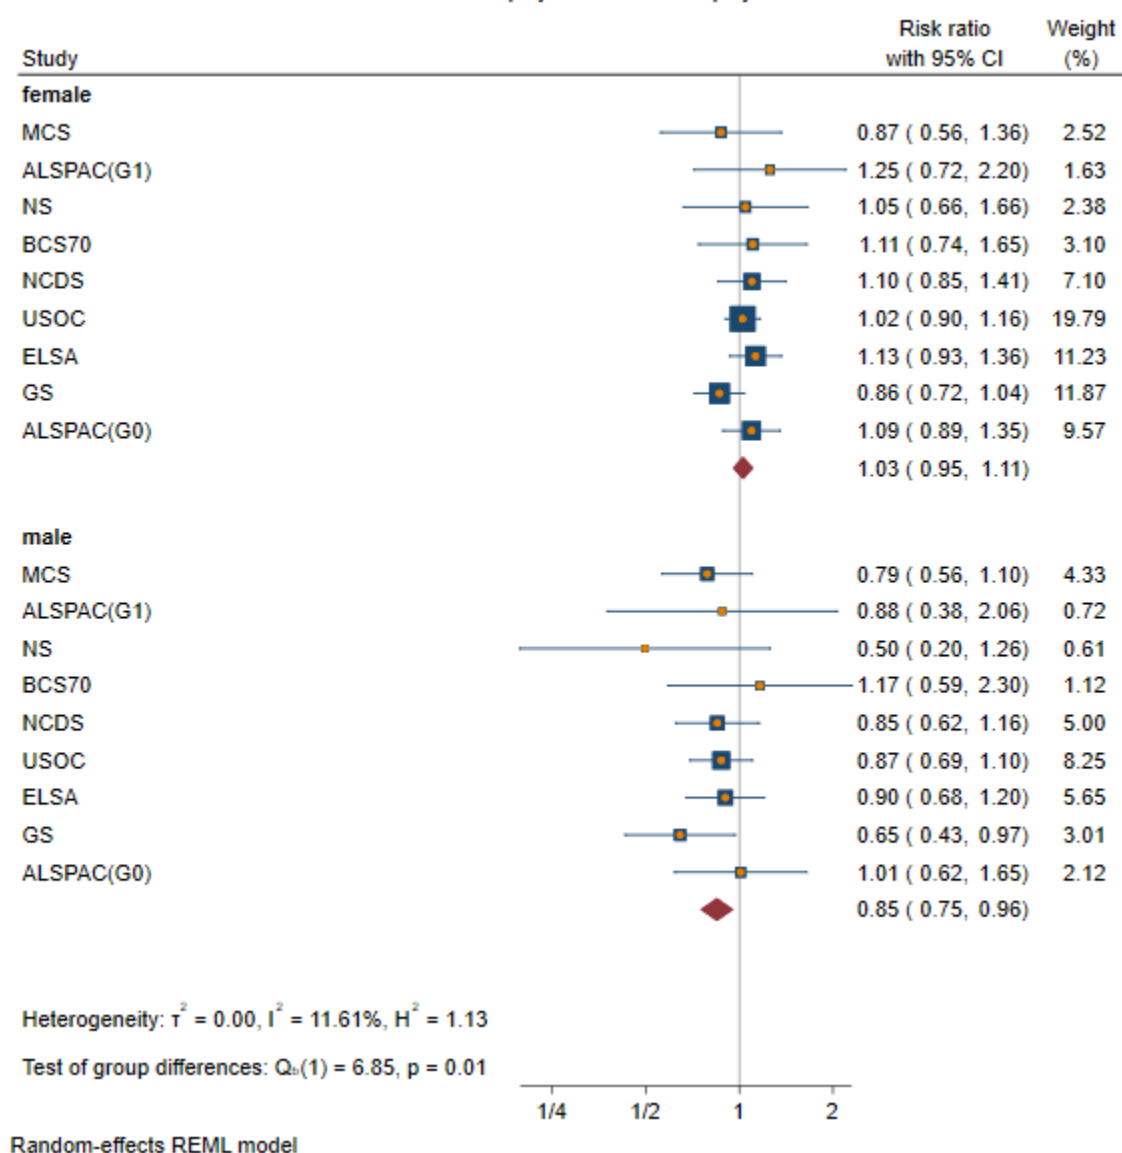

Figure set 28: More time/ days of physical exercise

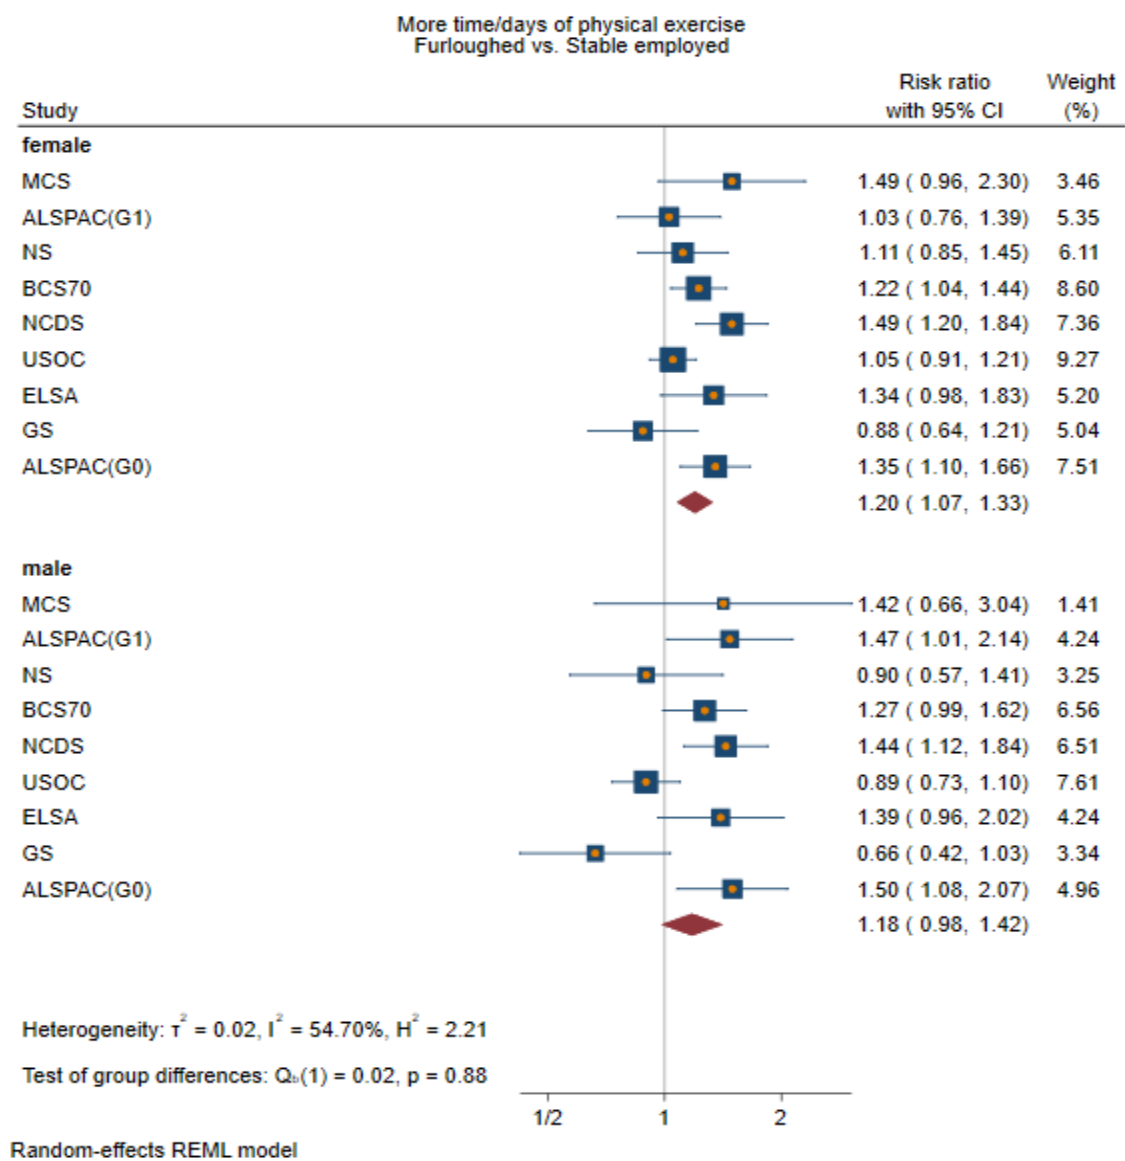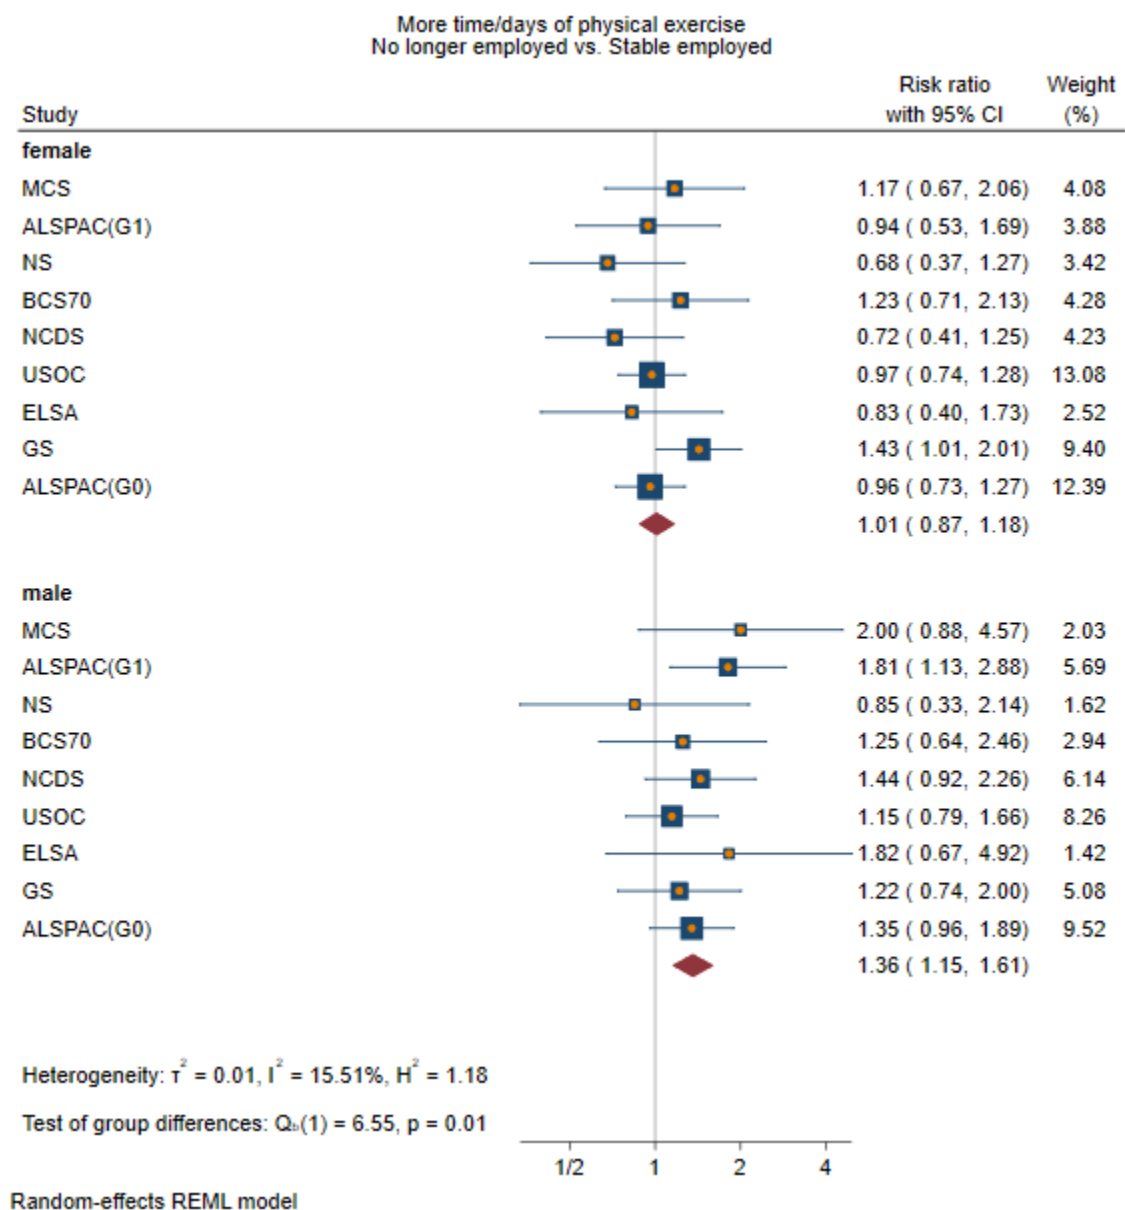



More time/days of physical exercise  
Stable unemployed vs. Stable employed

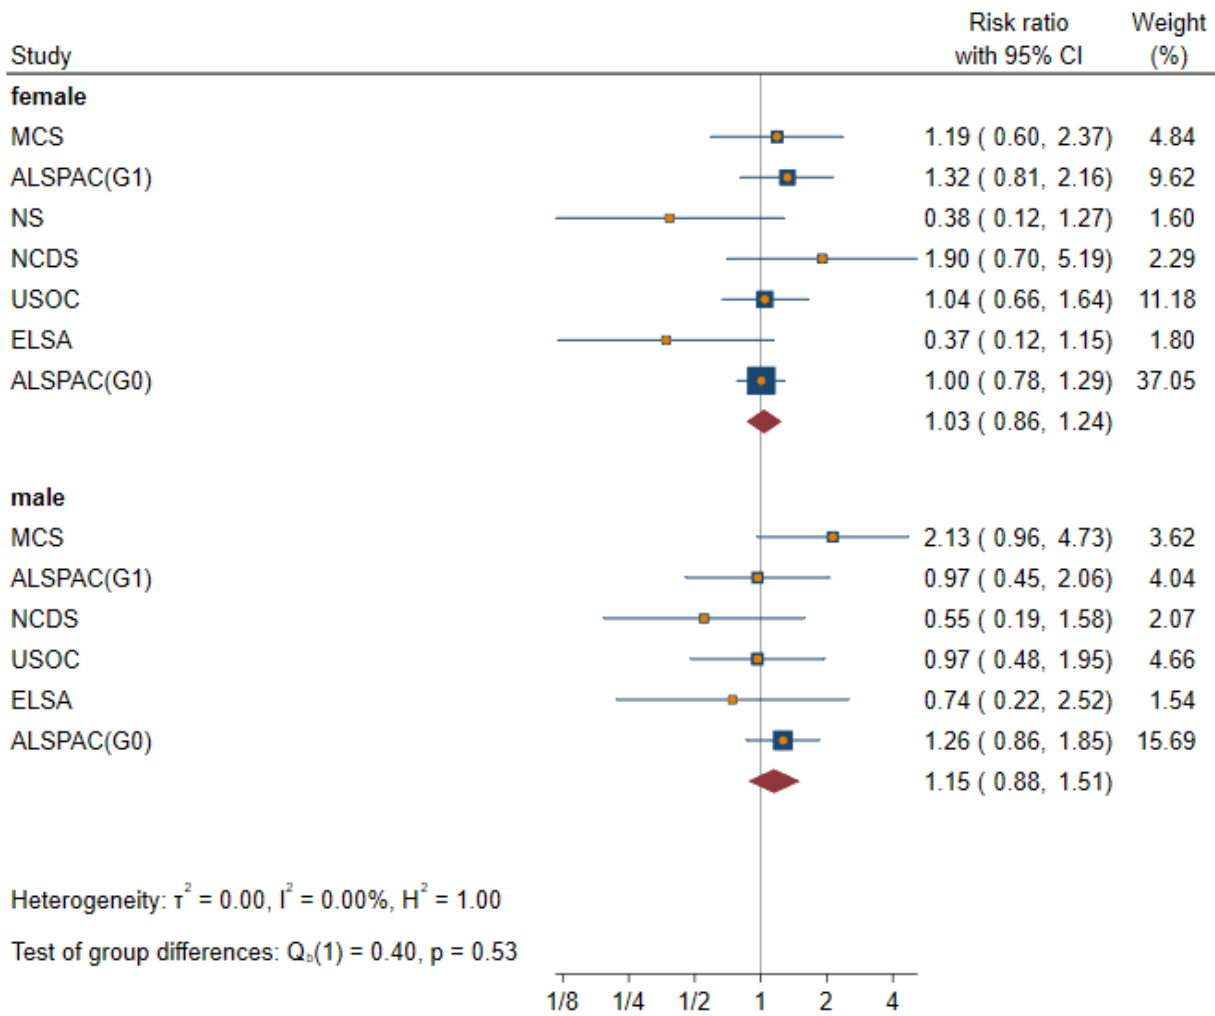

Random-effects REML model

More time/days of physical exercise  
Became employed vs. Stable employed

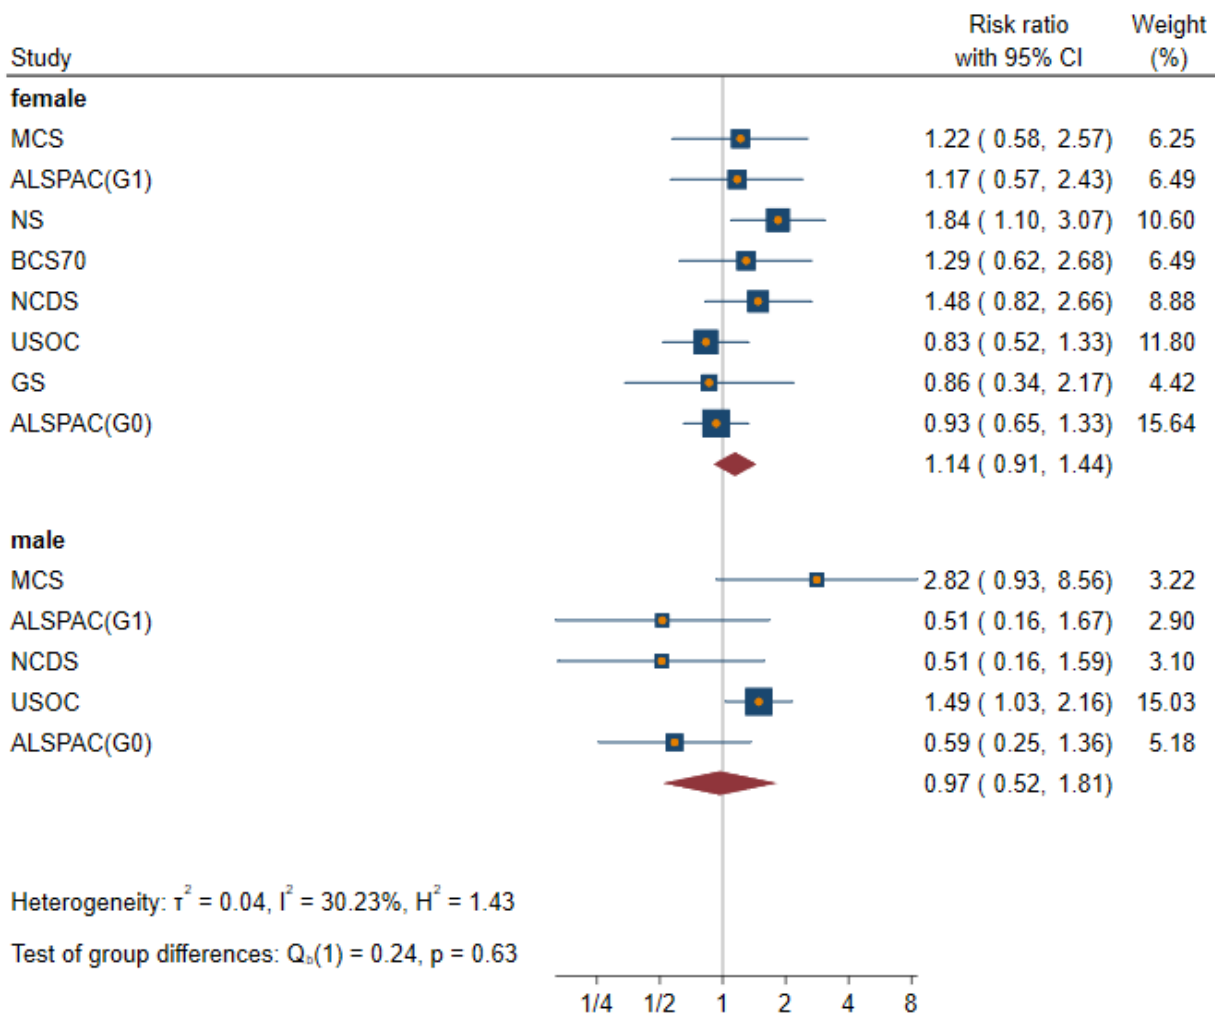

Random-effects REML model



More time/days of physical exercise  
Stable non-employed vs. Stable employed

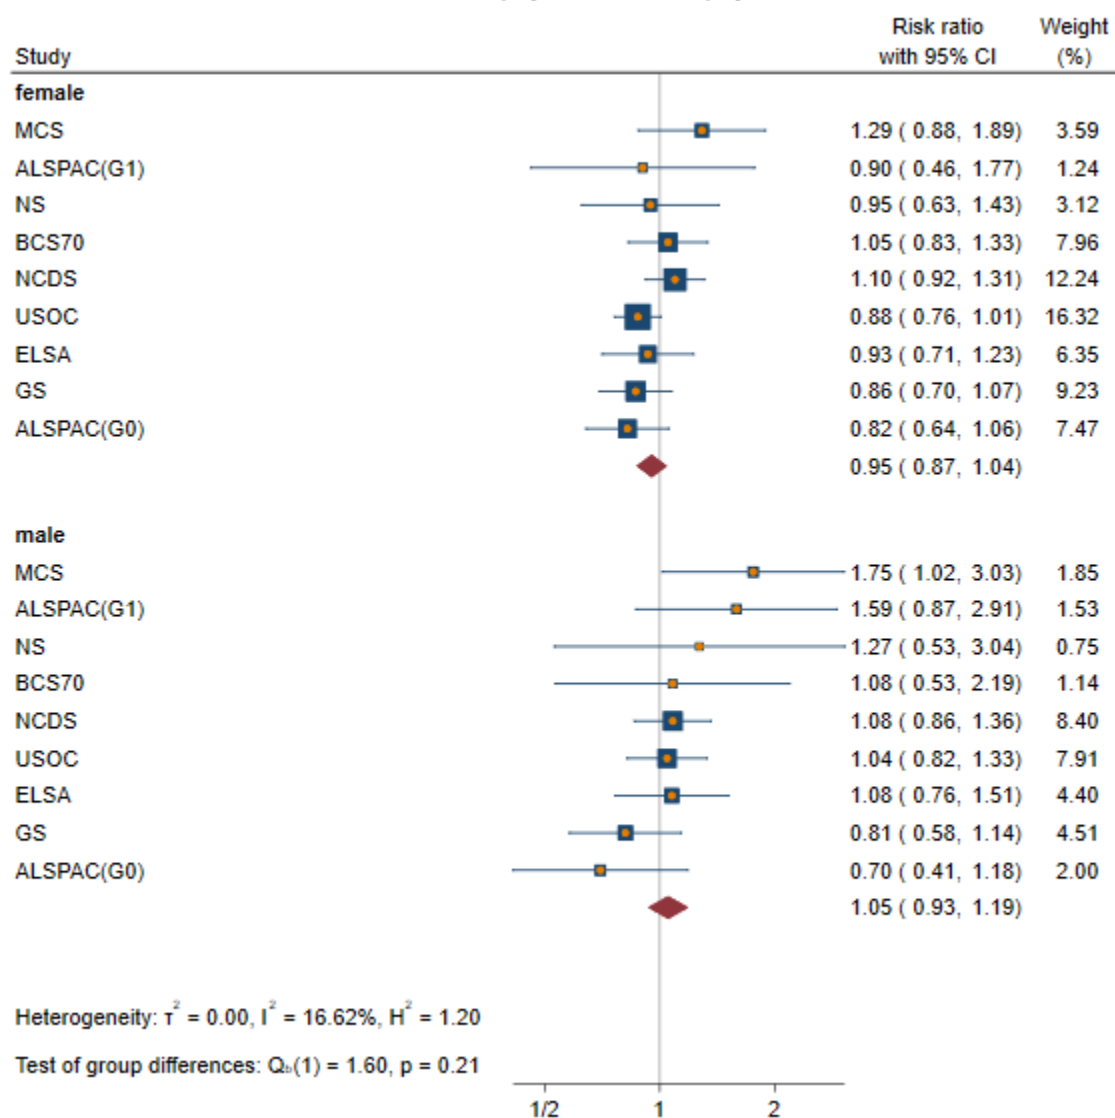

Figure set 29: Sleeps outside ‘normal range’ (i.e. <6 or 9+ hours)

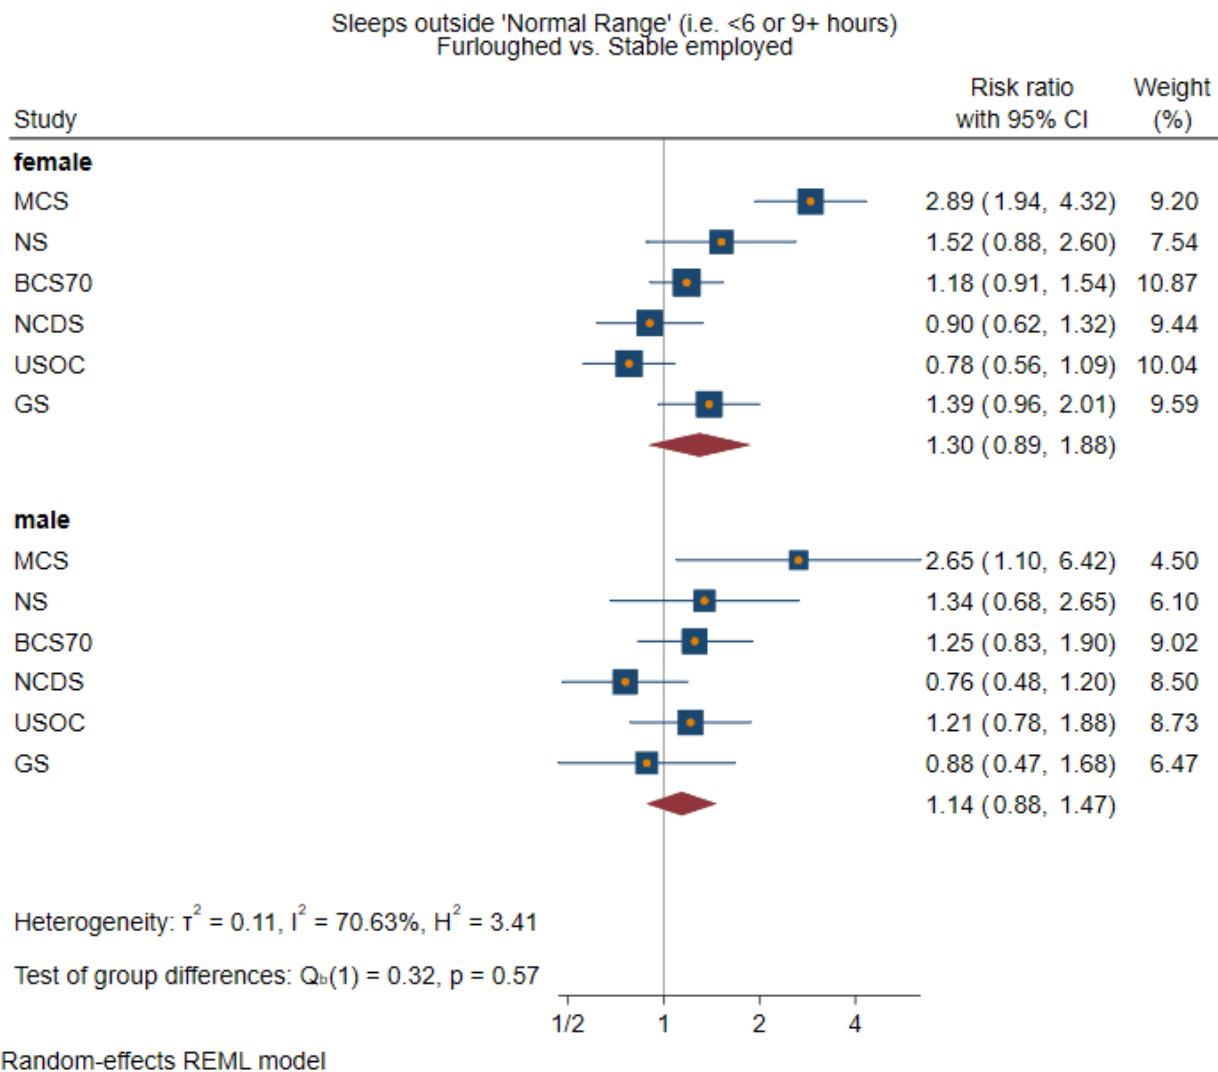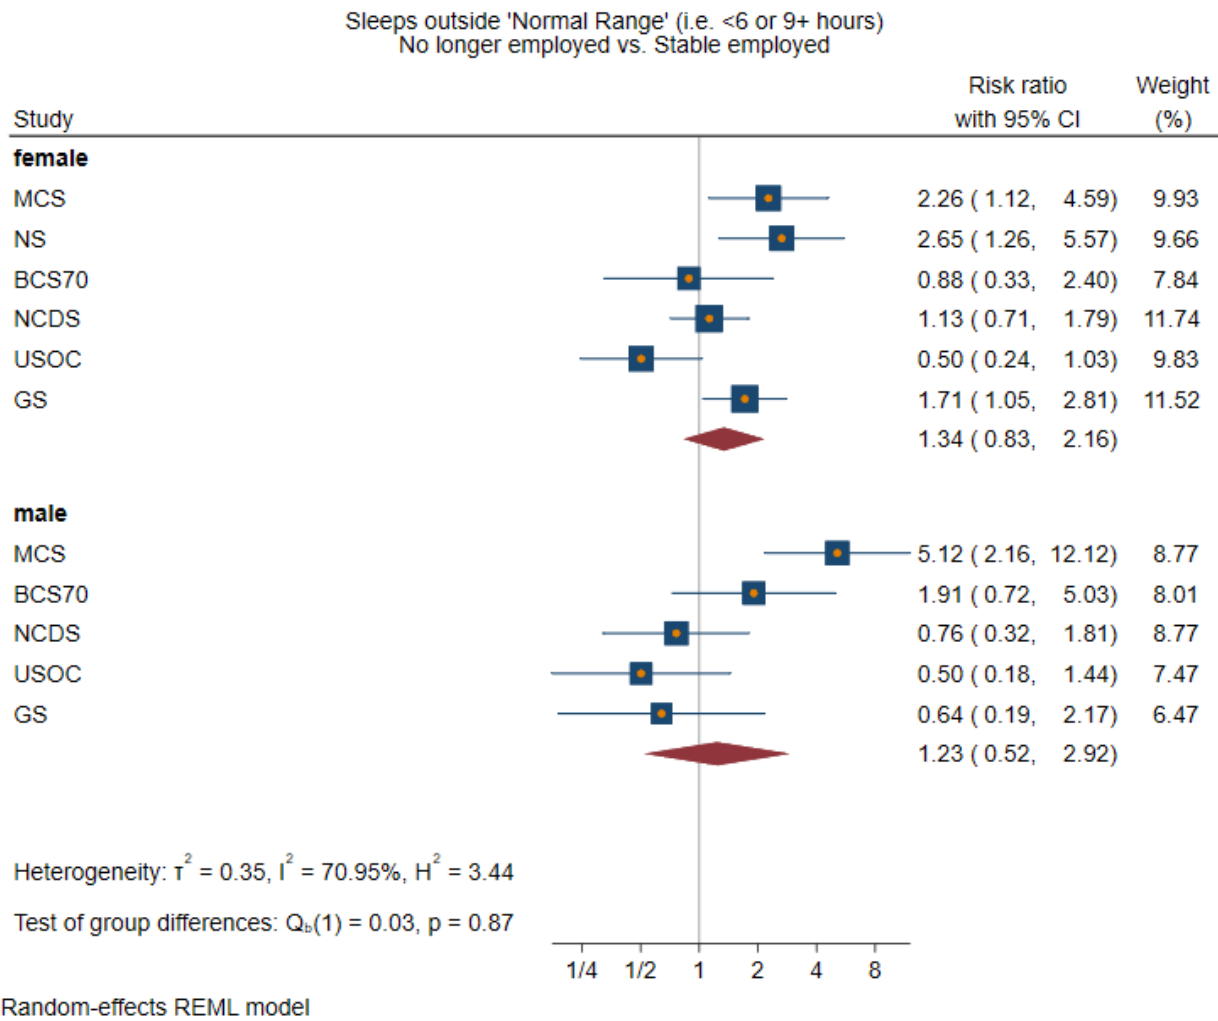

Sleeps outside 'Normal Range' (i.e. <6 or 9+ hours)  
Stable unemployed vs. Stable employed

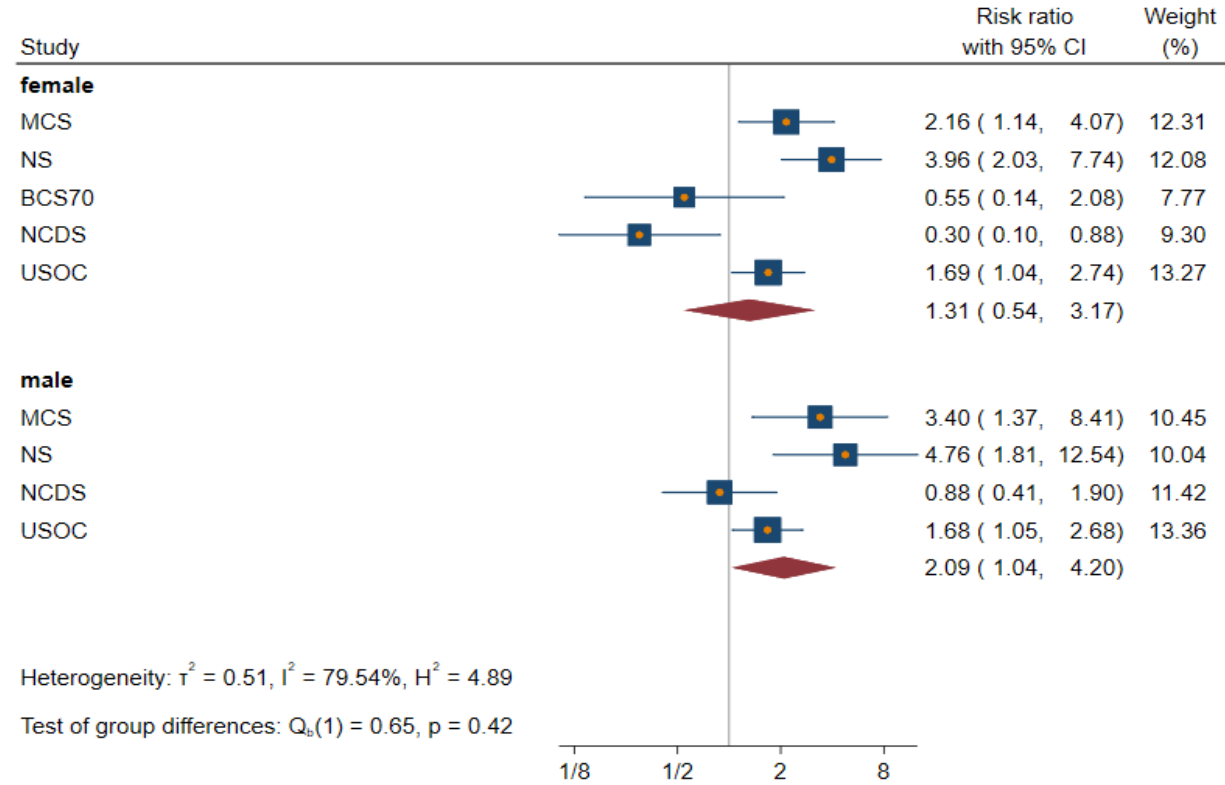

Random-effects REML model

Sleeps outside 'Normal Range' (i.e. <6 or 9+ hours)  
Became employed vs. Stable employed

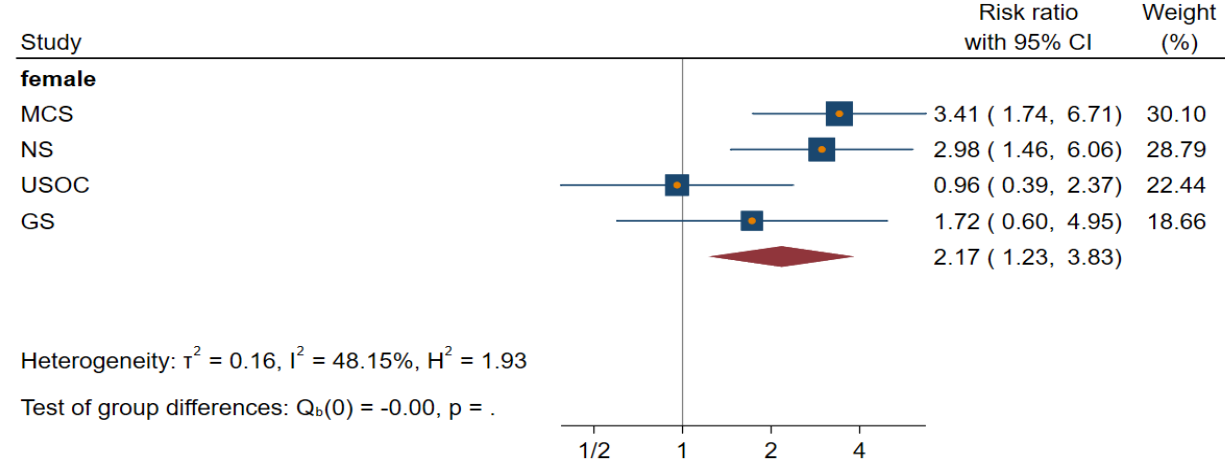

Random-effects REML model

Sleeps outside 'Normal Range' (i.e. <6 or 9+ hours)  
Stable non-employed vs. Stable employed

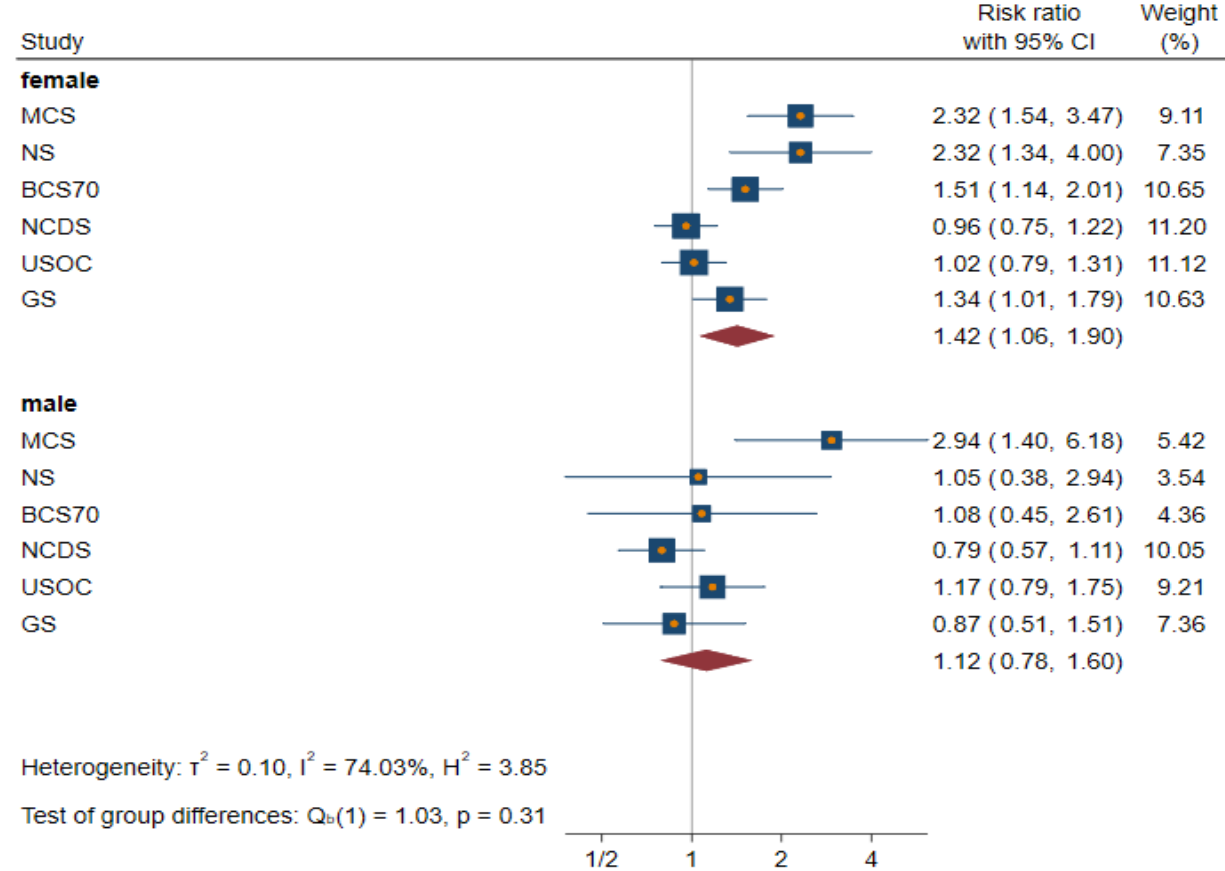

Random-effects REML model

Figure set 30: Sleeps less than before

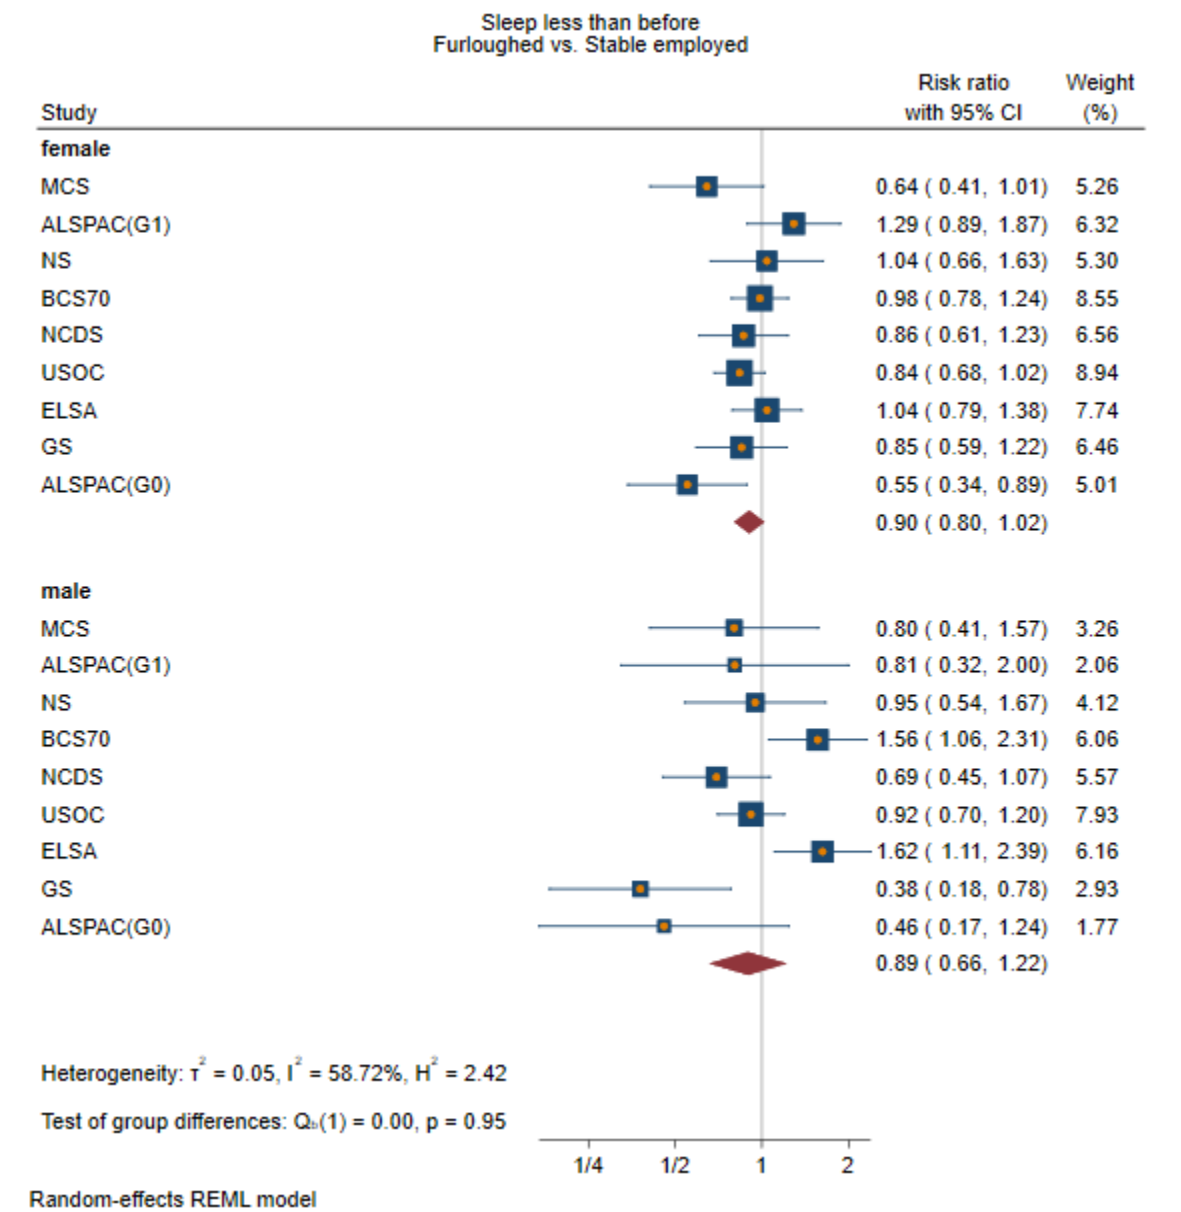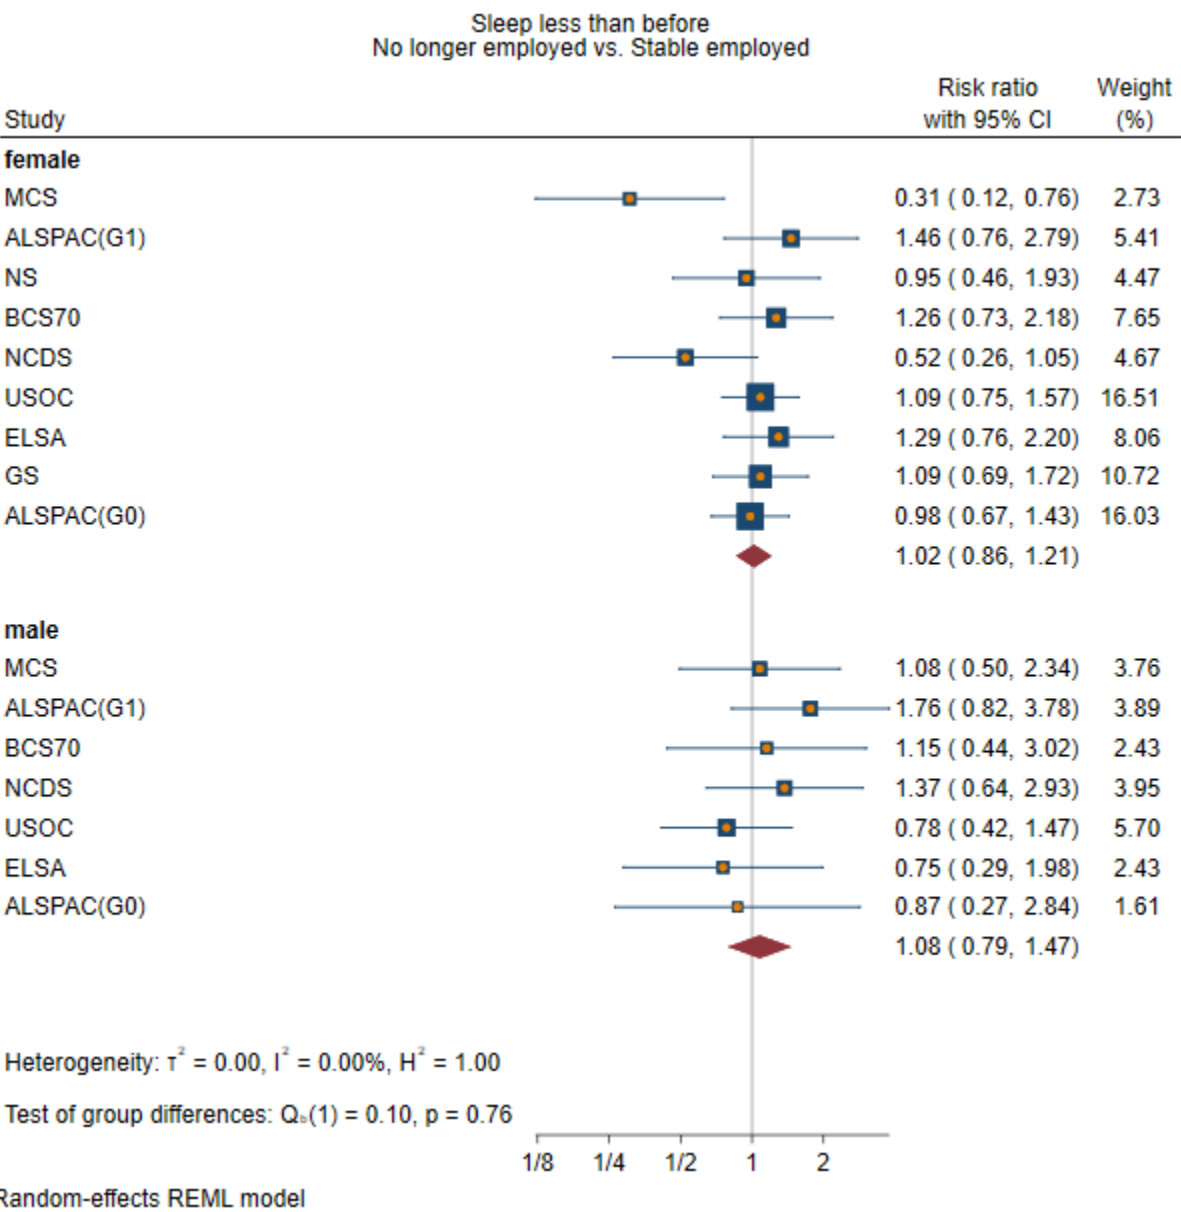

Sleep less than before  
Stable unemployed vs. Stable employed

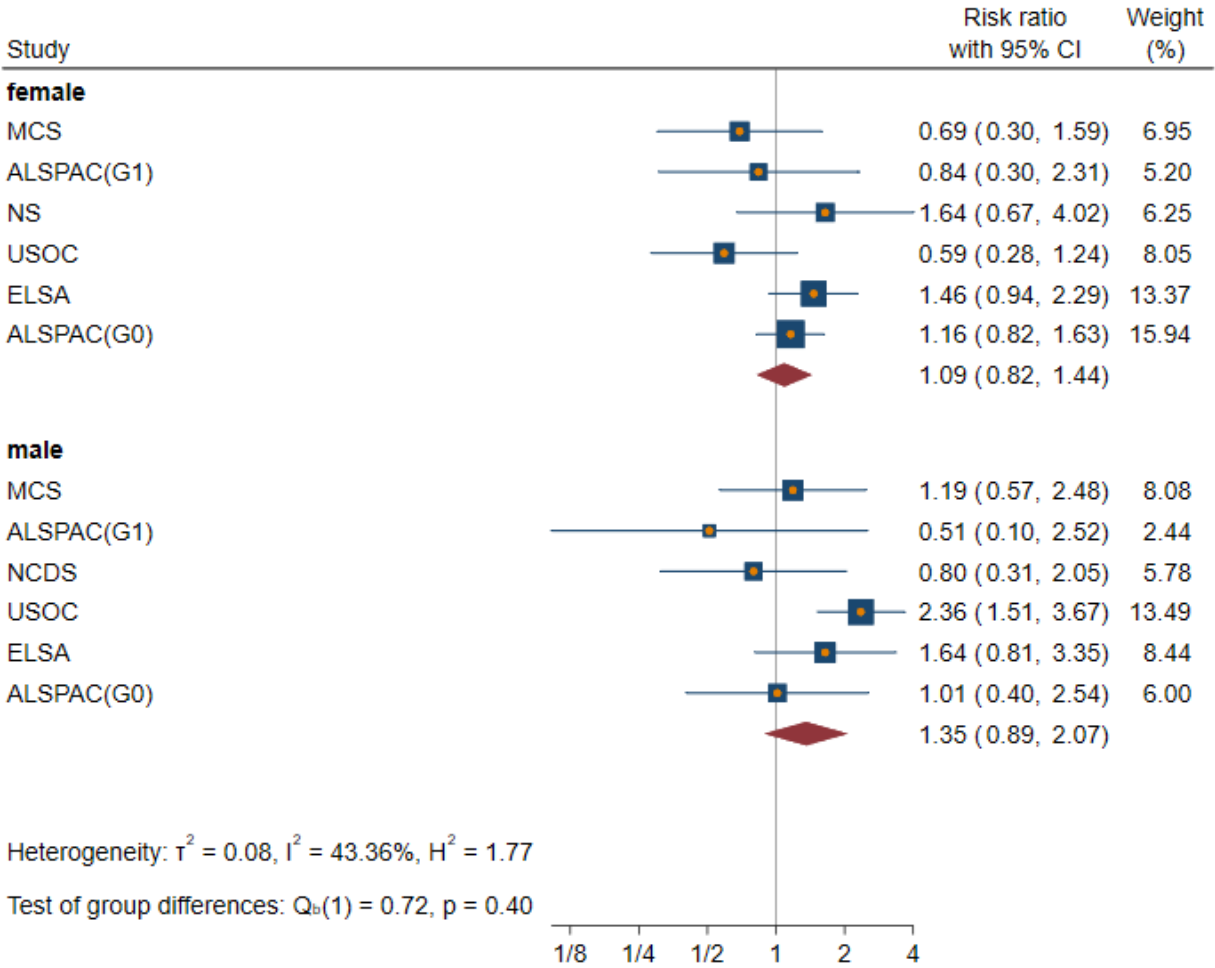

Sleep less than before  
Became employed vs. Stable employed

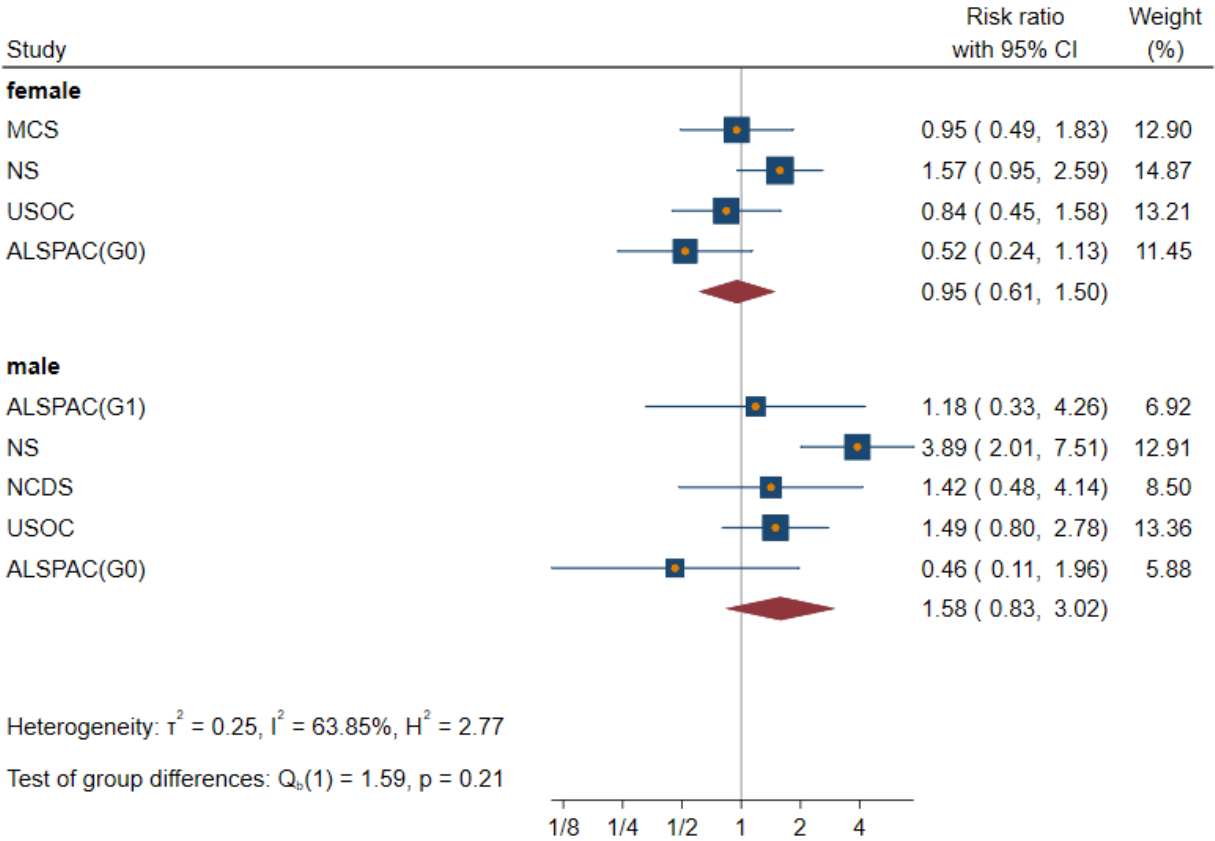

Sleep less than before  
Stable non-employed vs. Stable employed

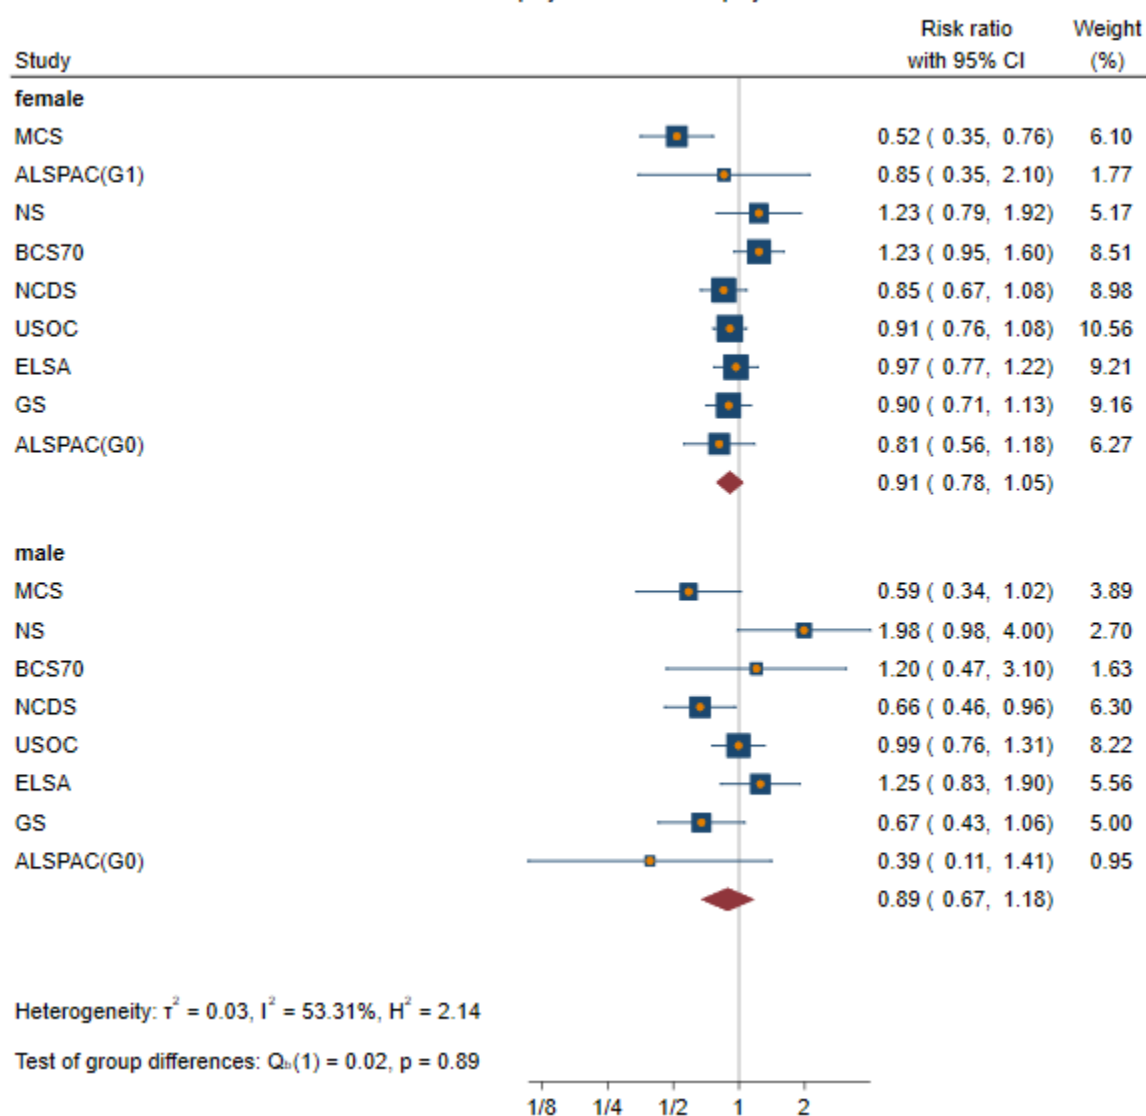

Figure set 31: Sleeps more than before

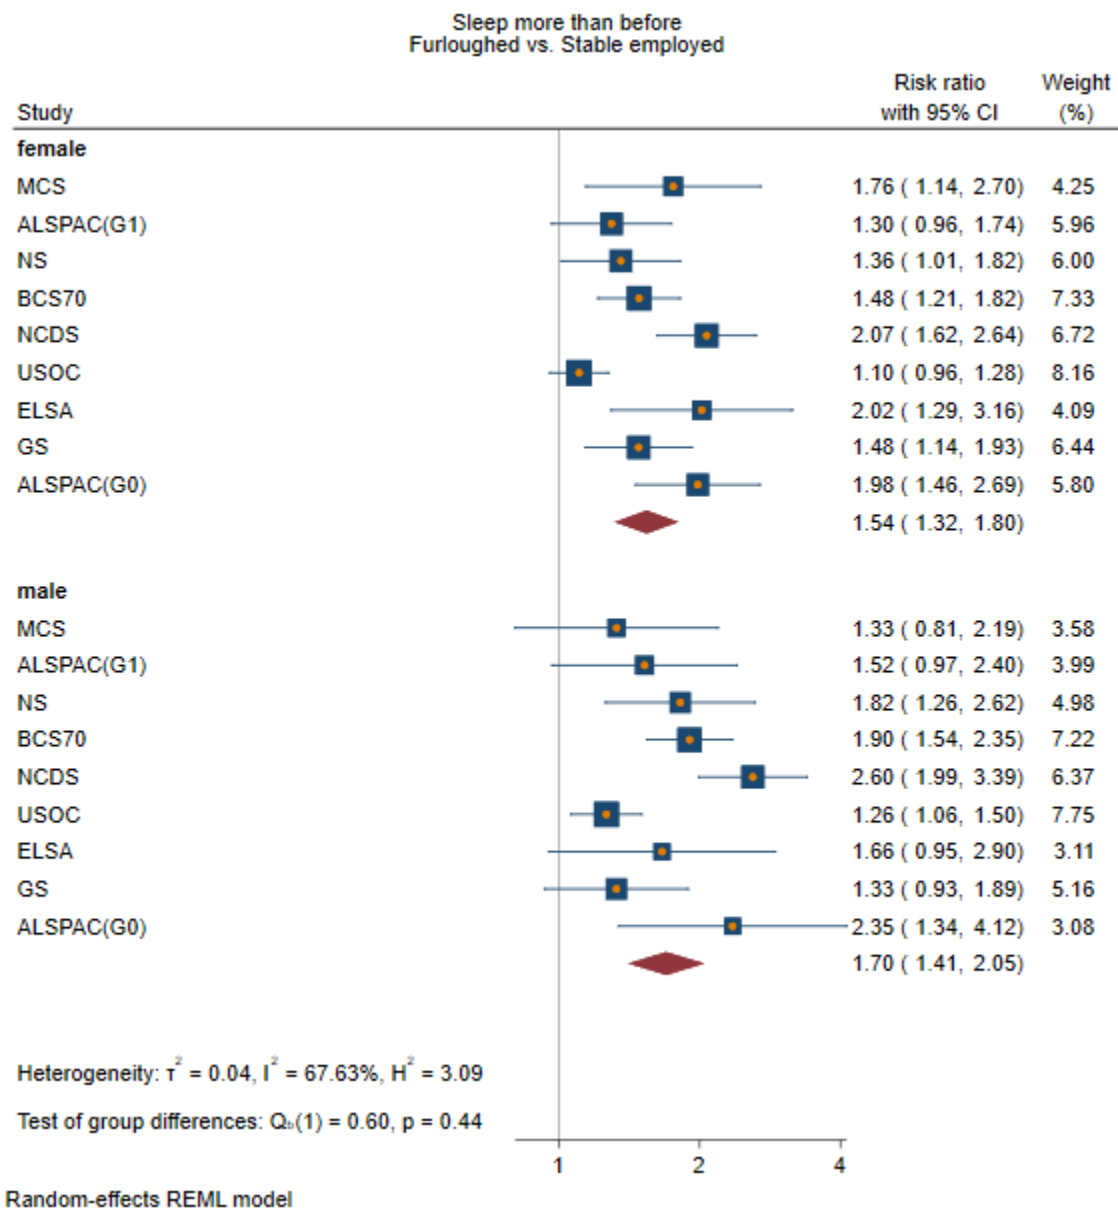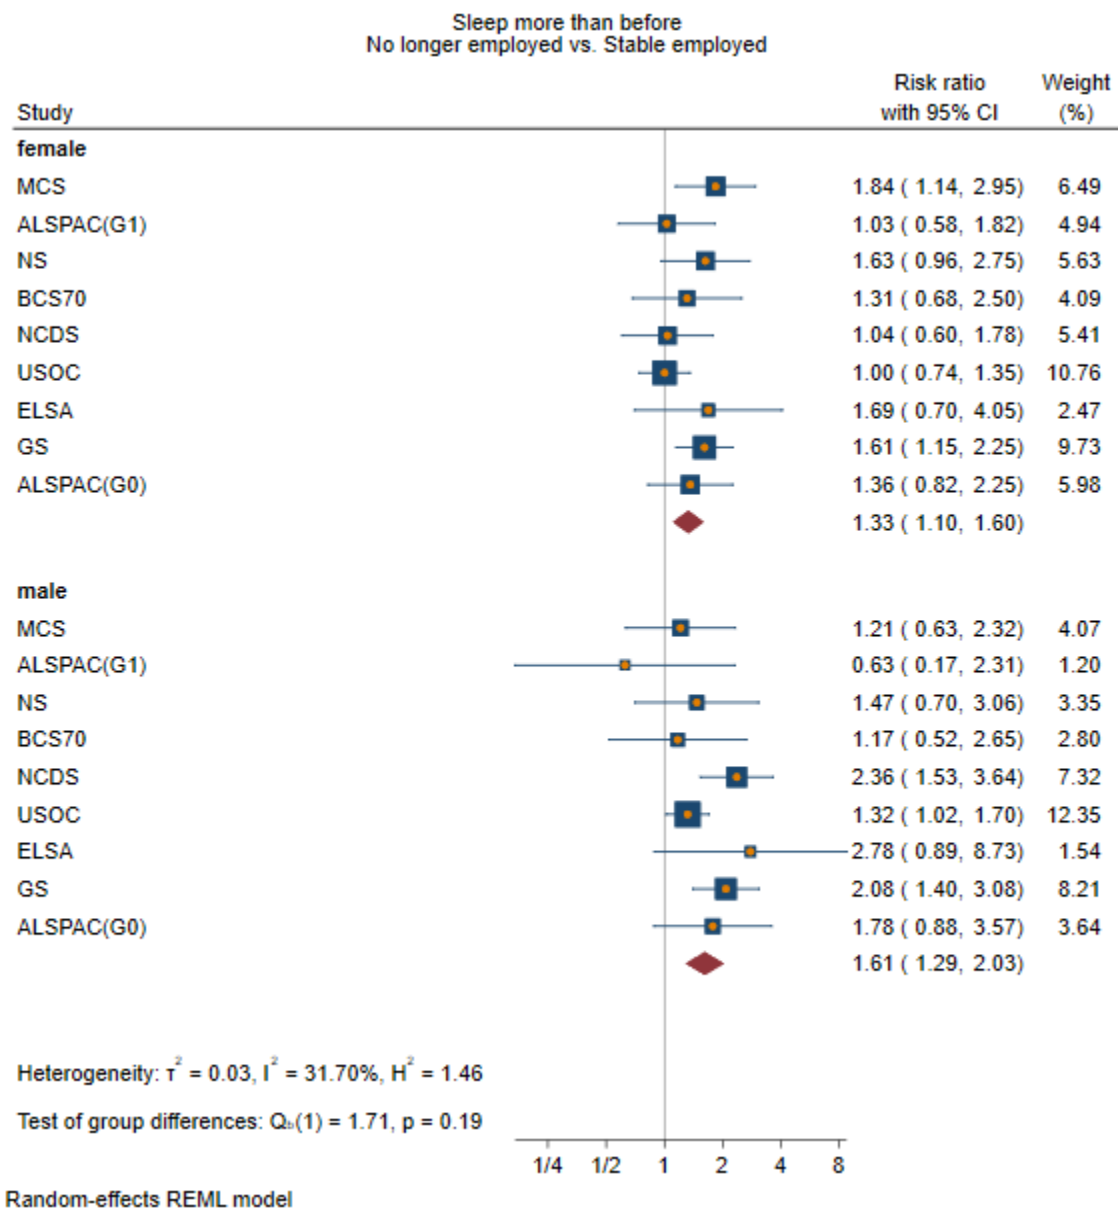

Sleep more than before  
Stable unemployed vs. Stable employed

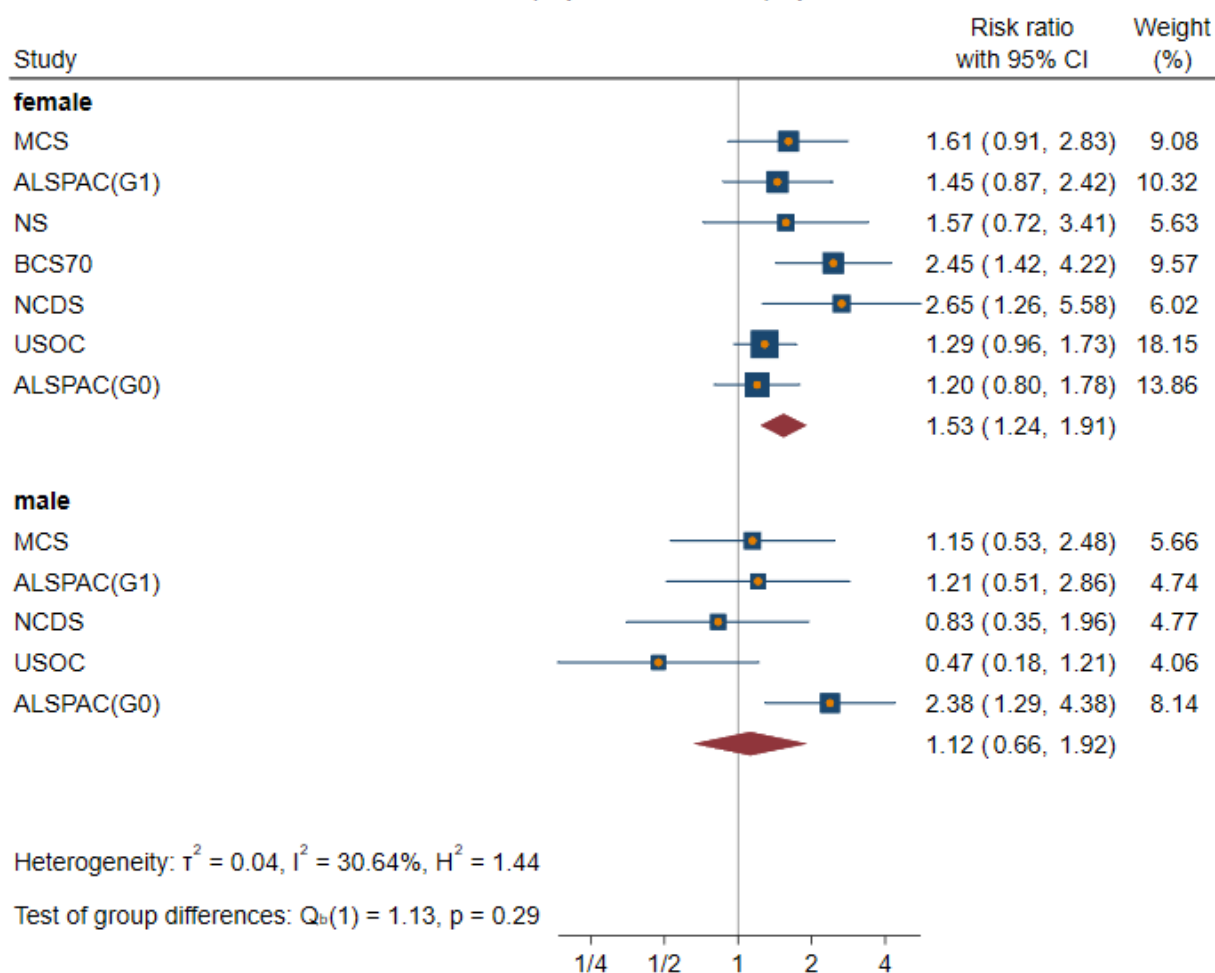

Random-effects REML model

Sleep more than before  
Became employed vs. Stable employed

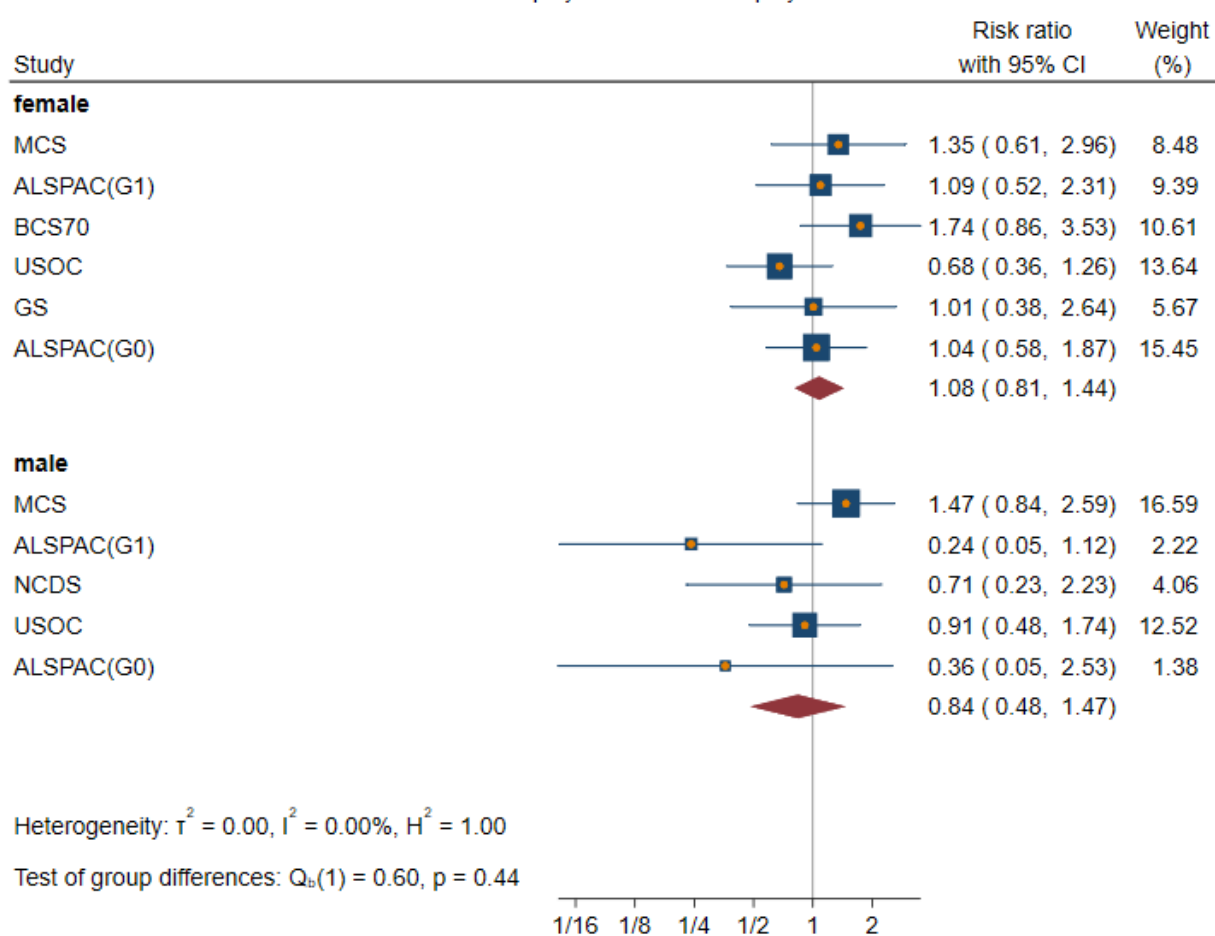

Random-effects REML model



Sleep more than before  
Stable non-employed vs. Stable employed

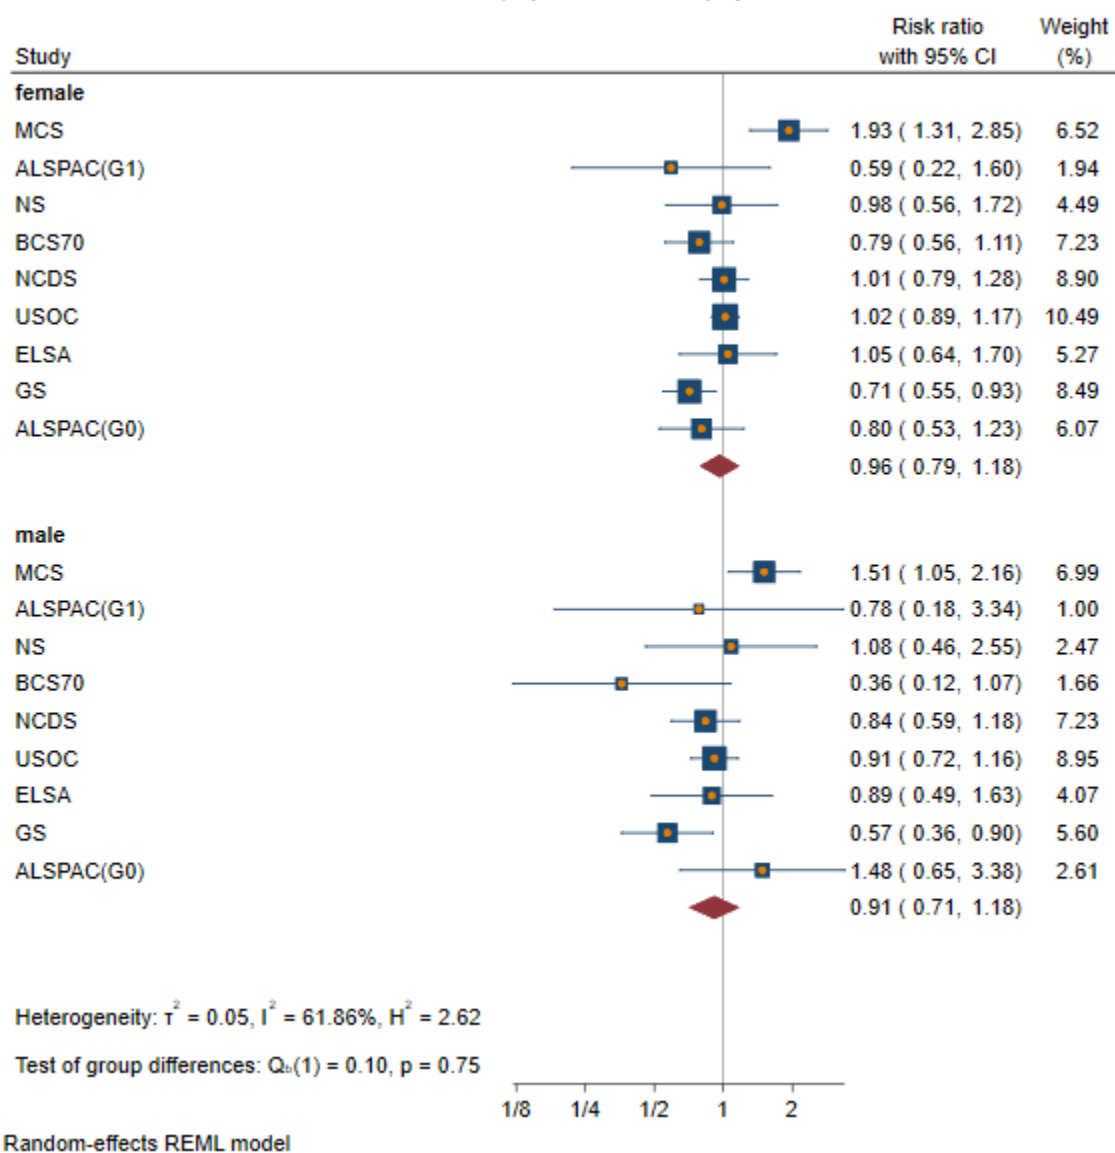

Figure set 32: From 6/9h a night to outside ‘normal range’

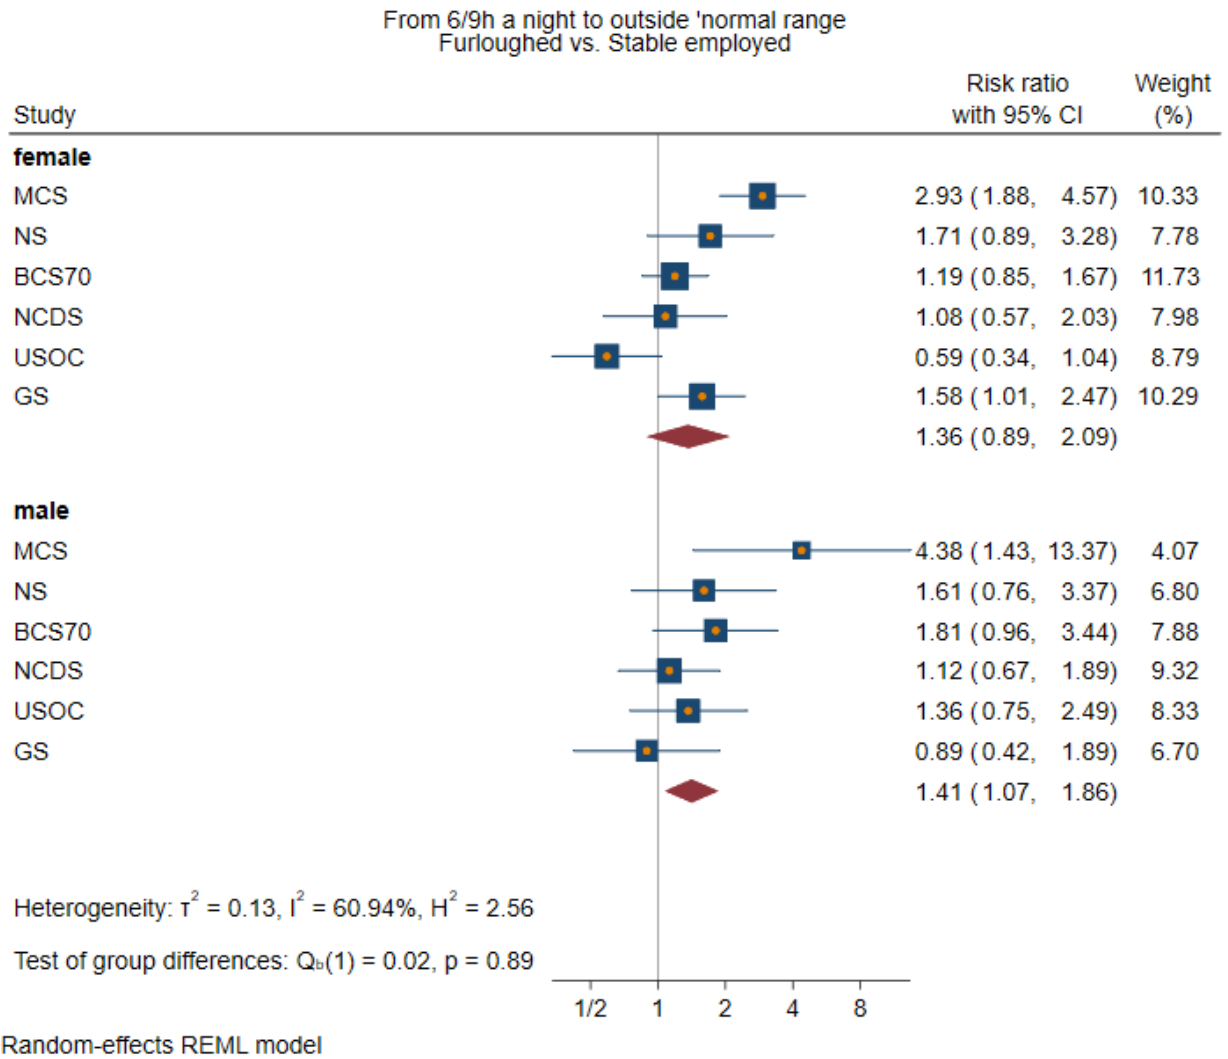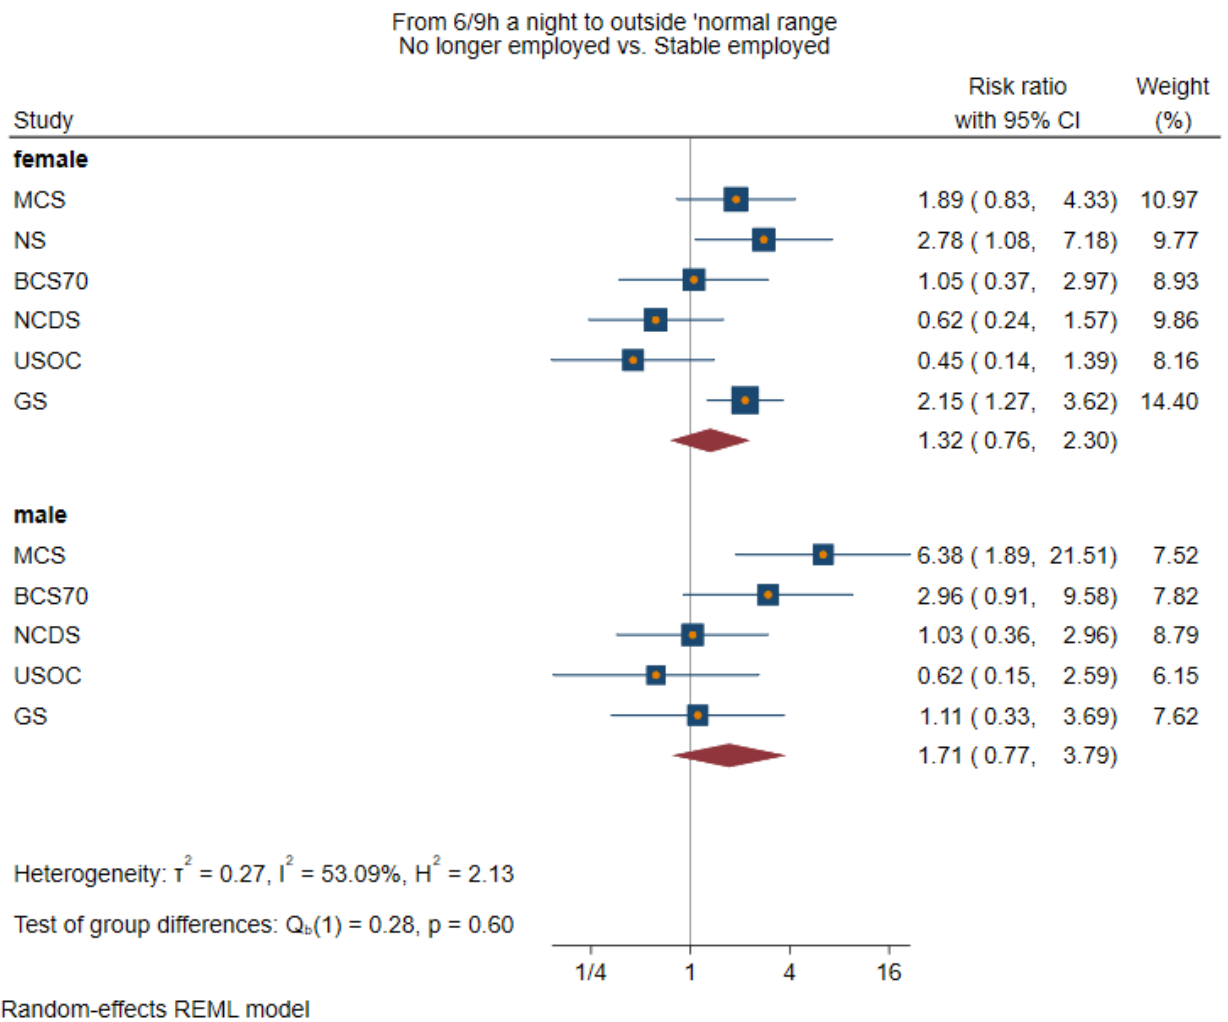

From 6/9h a night to outside 'normal range  
Stable unemployed vs. Stable employed

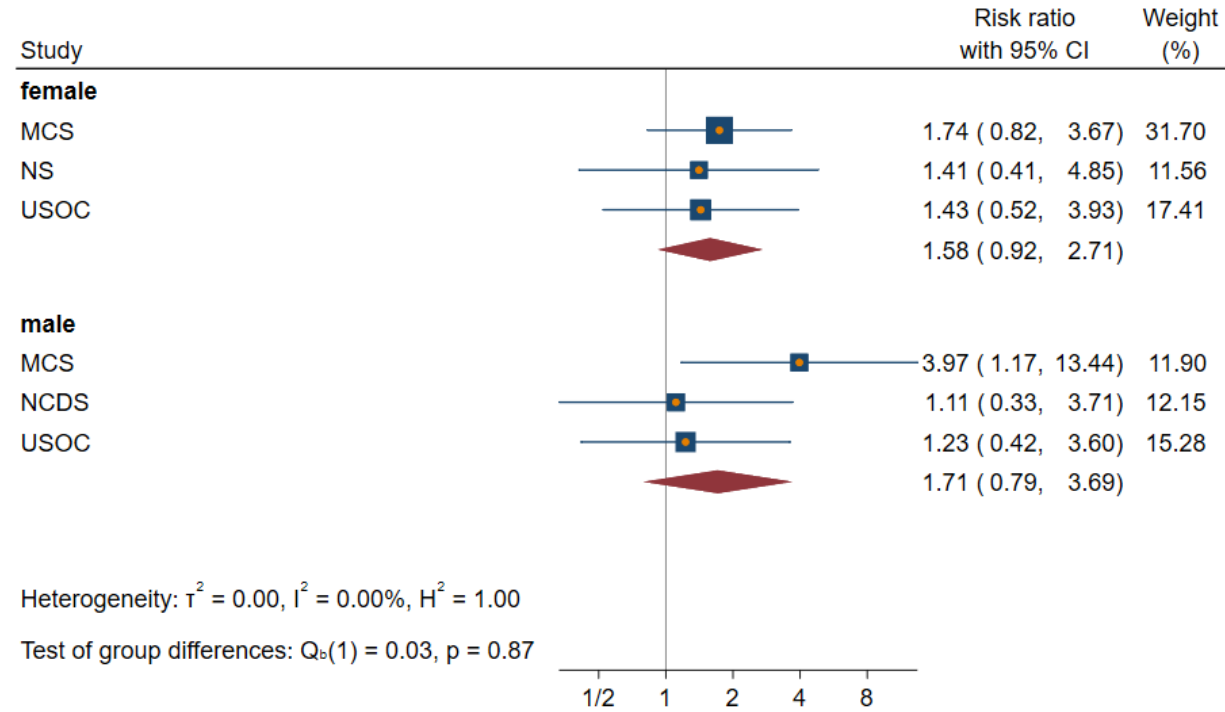

Random-effects REML model

From 6/9h a night to outside 'normal range  
Became employed vs. Stable employed

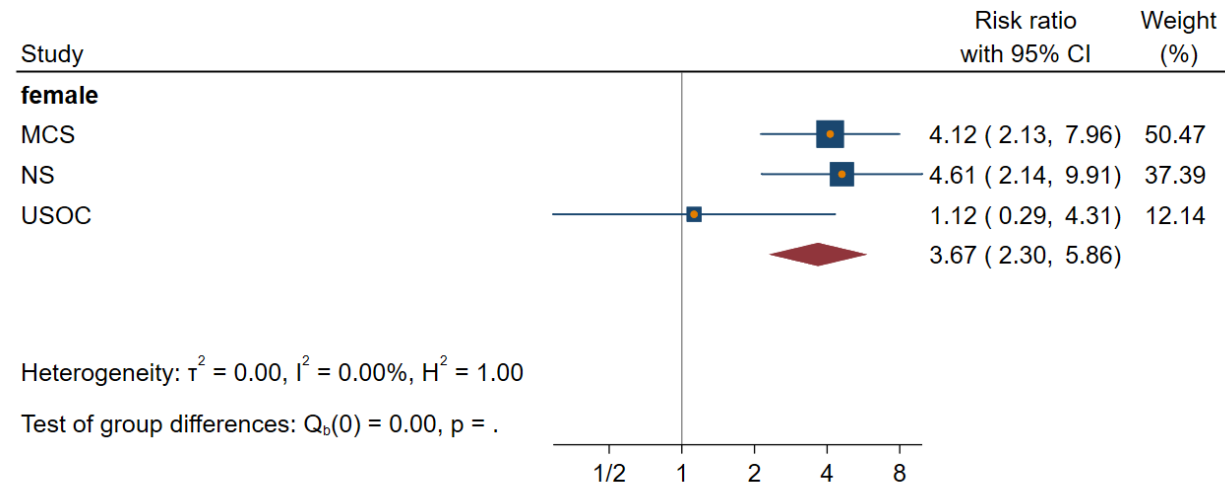

Random-effects REML model

From 6/9h a night to outside 'normal range  
Stable non-employed vs. Stable employed

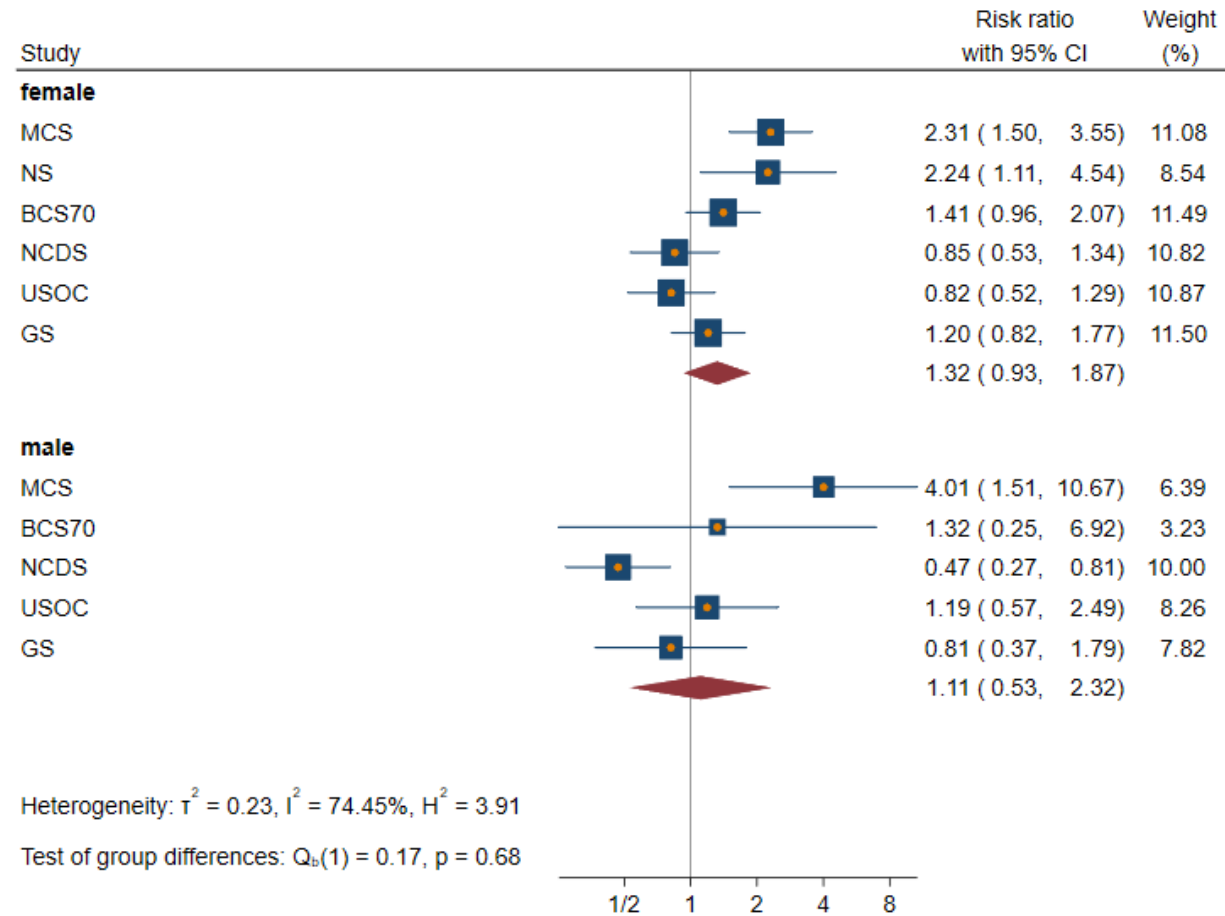

Random-effects REML model

Figure set 33: From outside ‘normal range’ to 6/9h a night

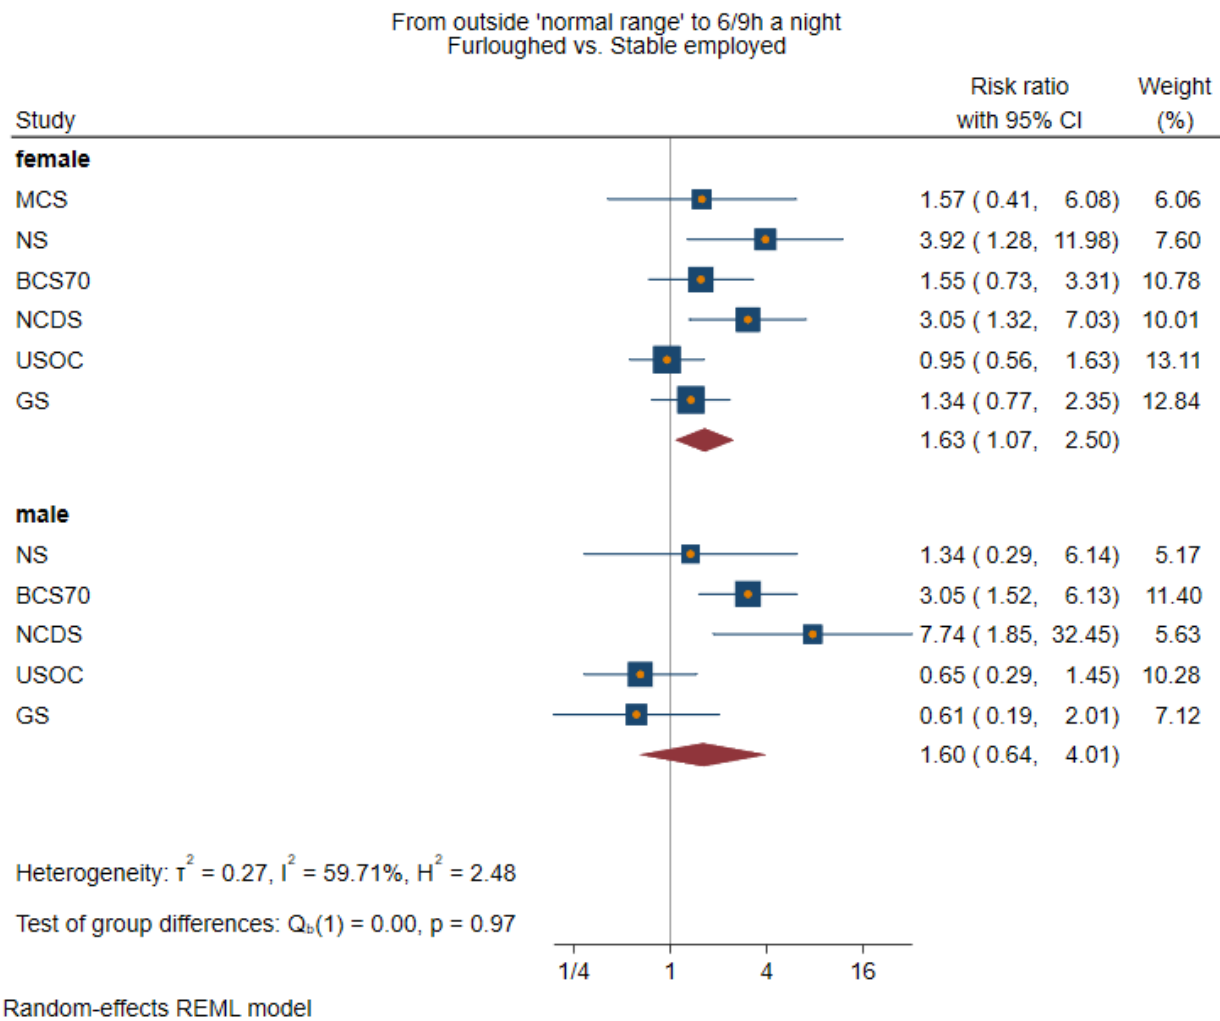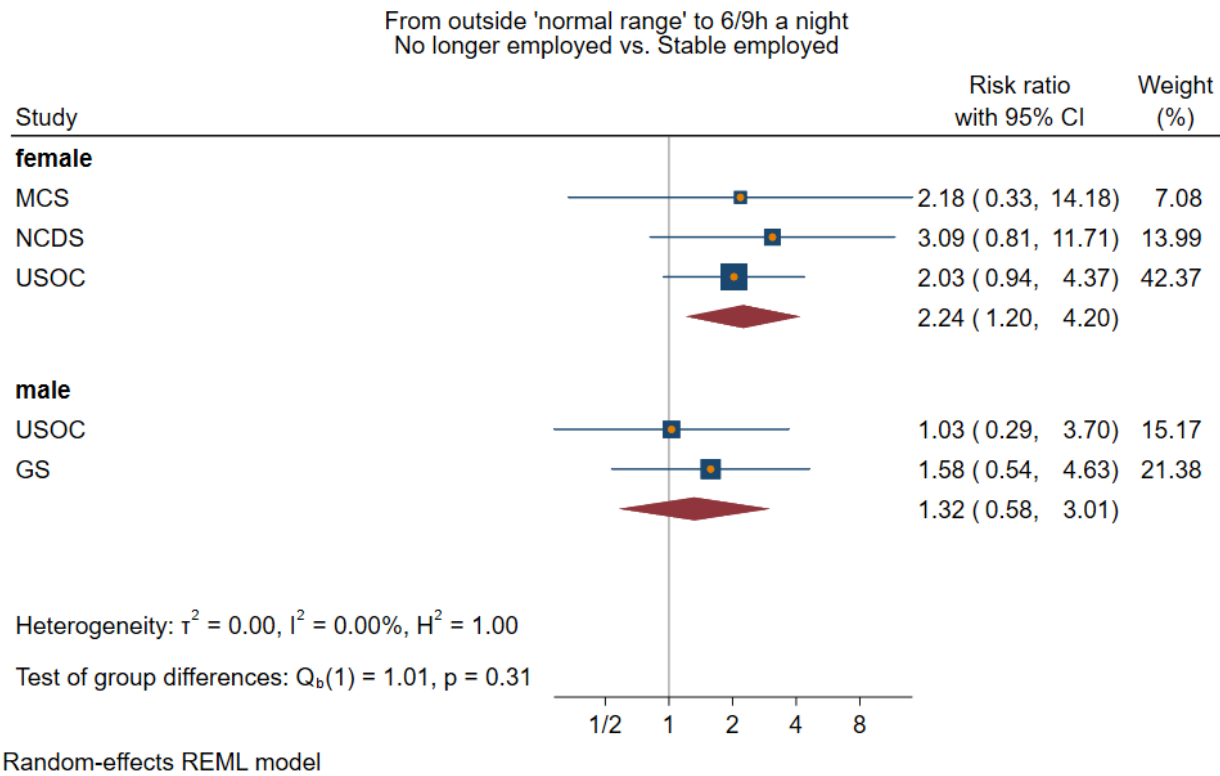

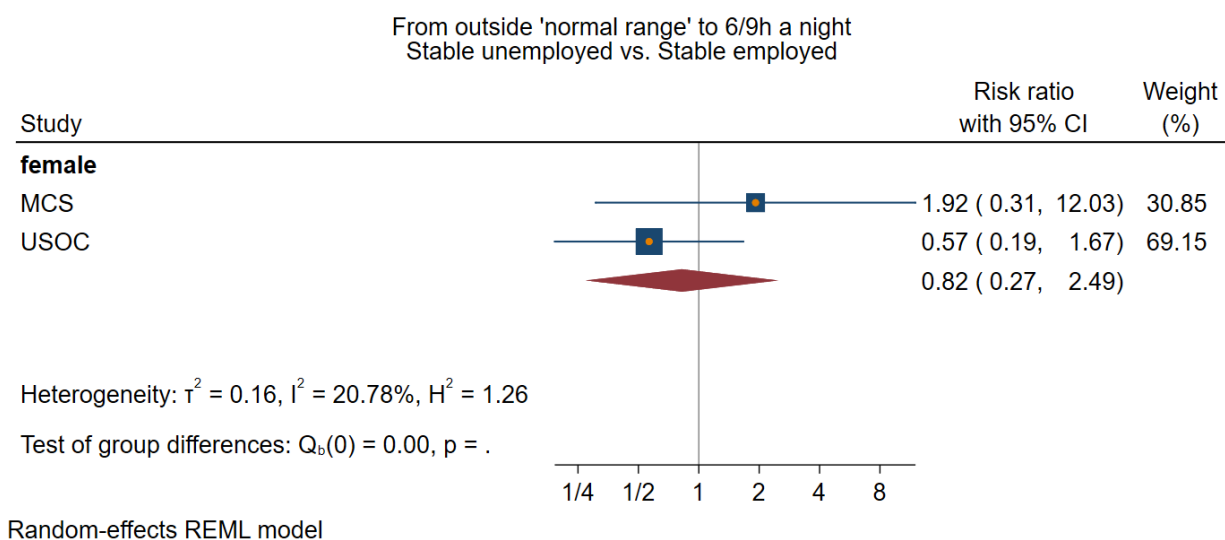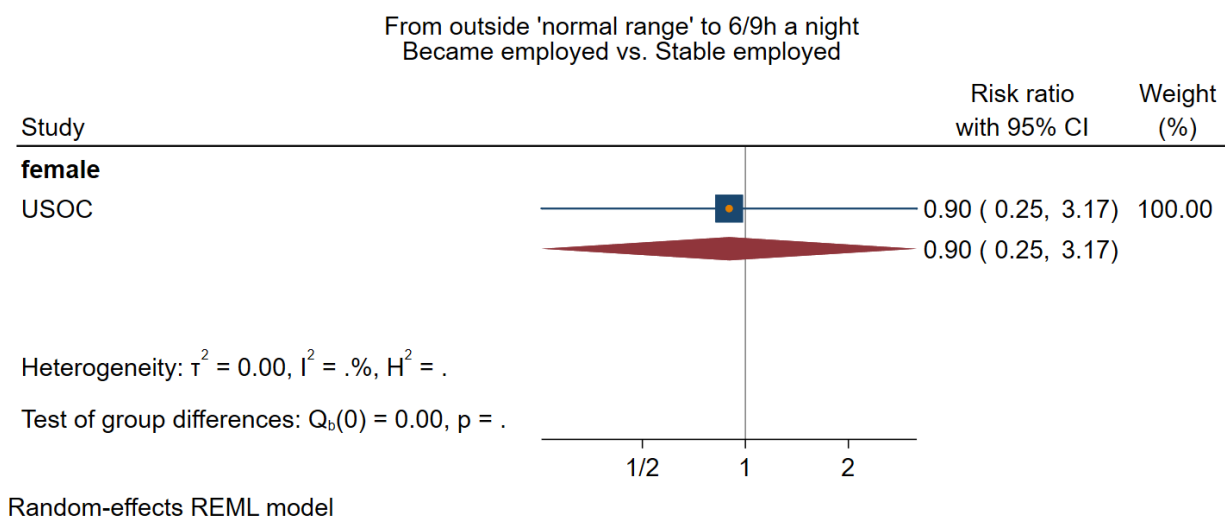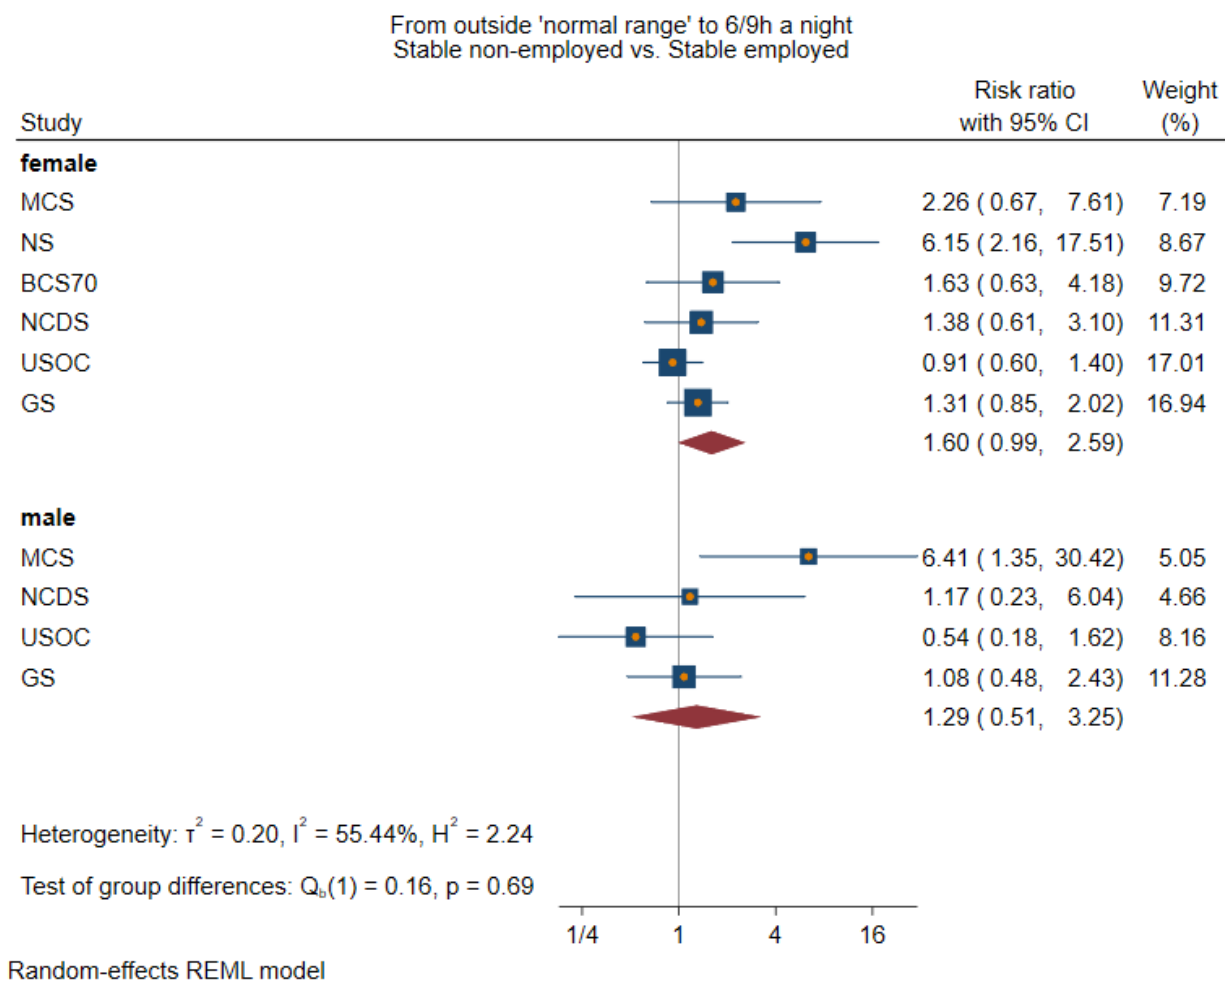

Supplement: MOESM4 [file 20290400]
